# Supplementary material for: Absolute quantitation of individual SARS-CoV-2 RNA molecules: a new paradigm for infection dynamics and variant differences
Source: bioRxiv preprint, doi:10.1101/2021.06.29.450133, version 2 (2021-07-09)
Supplement: Supplemental Table S2 [file 450133_file04.xlsx]

## Sheet: differential-expression_wide
gene_id	gene_name	gene_biotype	class	baseMean|mock_vs_B117_2h	baseMean|mock_vs_B117_8h	baseMean|mock_vs_B117_24h	baseMean|mock_vs_victoria_2h	baseMean|mock_vs_victoria_8h	baseMean|mock_vs_victoria_24h	baseMean|B117_vs_victoria_2h	baseMean|B117_vs_victoria_8h	baseMean|B117_vs_victoria_24h	baseMean|hpi2_vs_hpi8_B117	baseMean|hpi8_vs_hpi24_B117	baseMean|hpi2_vs_hpi24_B117	baseMean|hpi2_vs_hpi8_victoria	baseMean|hpi8_vs_hpi24_victoria	baseMean|hpi2_vs_hpi24_victoria	log2FoldChange|mock_vs_B117_2h	log2FoldChange|mock_vs_B117_8h	log2FoldChange|mock_vs_B117_24h	log2FoldChange|mock_vs_victoria_2h	log2FoldChange|mock_vs_victoria_8h	log2FoldChange|mock_vs_victoria_24h	log2FoldChange|B117_vs_victoria_2h	log2FoldChange|B117_vs_victoria_8h	log2FoldChange|B117_vs_victoria_24h	log2FoldChange|hpi2_vs_hpi8_B117	log2FoldChange|hpi8_vs_hpi24_B117	log2FoldChange|hpi2_vs_hpi24_B117	log2FoldChange|hpi2_vs_hpi8_victoria	log2FoldChange|hpi8_vs_hpi24_victoria	log2FoldChange|hpi2_vs_hpi24_victoria	lfcSE|mock_vs_B117_2h	lfcSE|mock_vs_B117_8h	lfcSE|mock_vs_B117_24h	lfcSE|mock_vs_victoria_2h	lfcSE|mock_vs_victoria_8h	lfcSE|mock_vs_victoria_24h	lfcSE|B117_vs_victoria_2h	lfcSE|B117_vs_victoria_8h	lfcSE|B117_vs_victoria_24h	lfcSE|hpi2_vs_hpi8_B117	lfcSE|hpi8_vs_hpi24_B117	lfcSE|hpi2_vs_hpi24_B117	lfcSE|hpi2_vs_hpi8_victoria	lfcSE|hpi8_vs_hpi24_victoria	lfcSE|hpi2_vs_hpi24_victoria	stat|mock_vs_B117_2h
ENSG00000223972	DDX11L1	transcribed_unprocessed_pseudogene	human	0	0.399128	0	0.153878	0.295833	0	0.141911	0.717298	0	0.368651	0.340913	0	0.44604	0.257997	0.133614	NA	2.07515	NA	1.03172	1.69434	NA	0.789963	-0.36132	NA	1.85056	-1.6145	NA	0.707679	-1.29865	-0.628535	NA	3.12394	NA	4.08047	3.77676	NA	4.08047	2.37446	NA	3.10157	3.25204	NA	3.0139	4.00993	4.08047	NA
ENSG00000227232	WASH7P	unprocessed_pseudogene	human	3.19253	3.84929	3.34022	3.93121	3.62962	2.74435	3.83376	4.27445	2.84043	3.76345	3.89054	3.25118	4.31817	3.07509	3.33923	0.179316	0.366519	0.484773	0.565664	0.255432	-0.105107	0.413616	-0.117955	-0.589284	0.228643	0.115728	0.329091	-0.282574	-0.357495	-0.659708	1.18421	1.01059	1.06477	0.989749	1.02079	1.19994	1.03327	0.921448	1.12562	1.05039	0.961166	1.122	0.905155	1.0967	1.0658	0.151422
ENSG00000278267	MIR6859-1	miRNA	human	1.35074	1.44767	1.10299	1.90555	2.26338	1.50388	0.764635	1.09351	0.322484	0.263344	0.0788701	0.146035	1.58581	1.21053	0.93063	-2.60596	-3.03901	-3.36737	-0.942422	-0.45849	-1.58893	1.66802	2.58084	1.78241	-0.416287	-0.30784	-0.746246	0.51757	-1.12622	-0.624105	1.8642	1.82491	2.0188	1.46039	1.26398	1.7098	2.30735	1.95266	3.34019	3.5844	4.07171	4.08047	1.54049	1.79648	2.08989	-1.3979
ENSG00000243485	MIR1302-2HG	lncRNA	human	0	0	0	0	0	0	0	0	0	0	0	0	0	0	0	NA	NA	NA	NA	NA	NA	NA	NA	NA	NA	NA	NA	NA	NA	NA	NA	NA	NA	NA	NA	NA	NA	NA	NA	NA	NA	NA	NA	NA	NA	NA
ENSG00000284332	MIR1302-2	miRNA	human	0	0	0	0	0	0	0	0	0	0	0	0	0	0	0	NA	NA	NA	NA	NA	NA	NA	NA	NA	NA	NA	NA	NA	NA	NA	NA	NA	NA	NA	NA	NA	NA	NA	NA	NA	NA	NA	NA	NA	NA	NA
ENSG00000237613	FAM138A	lncRNA	human	0.50606	0.443551	0.891339	0.327295	0.339997	0.45858	0.19321	0.0939515	0.66839	0.291602	0.714679	0.726734	0	0.167366	0.161583	-0.646262	-1.09187	1.07154	-1.79993	-1.90766	-0.514706	-1.13359	-0.806158	-1.58506	-0.41553	2.16624	1.73888	NA	1.3971	1.29502	2.73376	2.86137	2.24512	3.38218	3.29577	2.86855	4.08047	4.07175	2.60963	3.45332	2.54982	2.52792	NA	4.08047	4.08047	-0.236401
ENSG00000268020	OR4G4P	unprocessed_pseudogene	human	0	0	0	0	0	0	0	0	0	0	0	0	0	0	0	NA	NA	NA	NA	NA	NA	NA	NA	NA	NA	NA	NA	NA	NA	NA	NA	NA	NA	NA	NA	NA	NA	NA	NA	NA	NA	NA	NA	NA	NA	NA
ENSG00000240361	OR4G11P	transcribed_unprocessed_pseudogene	human	0	0	0	0	0	0	0	0	0	0	0	0	0	0	0	NA	NA	NA	NA	NA	NA	NA	NA	NA	NA	NA	NA	NA	NA	NA	NA	NA	NA	NA	NA	NA	NA	NA	NA	NA	NA	NA	NA	NA	NA	NA
ENSG00000186092	OR4F5	protein_coding	human	0	0	0	0	0	0	0	0	0	0	0	0	0	0	0	NA	NA	NA	NA	NA	NA	NA	NA	NA	NA	NA	NA	NA	NA	NA	NA	NA	NA	NA	NA	NA	NA	NA	NA	NA	NA	NA	NA	NA	NA	NA
ENSG00000238009	AL627309.1	lncRNA	human	0.1497	0.172413	0.341469	0.715187	0.166899	0.339568	0.511343	0	0.342525	0	0.211936	0.185832	0.557327	0.198997	0.672628	-0.703018	-1.09864	0.457628	1.64881	-1.00226	0.392564	2.3732	NA	-0.0655584	NA	1.55757	1.17731	-2.62526	1.3971	-1.24581	4.08047	4.08047	3.36125	2.59577	4.08047	3.43156	2.9992	NA	3.31628	NA	4.08047	4.08047	2.945	4.08047	2.66057	-0.172288
ENSG00000239945	AL627309.3	lncRNA	human	0	0	0	0	0	0	0	0	0	0	0	0	0	0	0	NA	NA	NA	NA	NA	NA	NA	NA	NA	NA	NA	NA	NA	NA	NA	NA	NA	NA	NA	NA	NA	NA	NA	NA	NA	NA	NA	NA	NA	NA	NA
ENSG00000233750	CICP27	processed_pseudogene	human	0	0	0	0	0	0	0	0	0	0	0	0	0	0	0	NA	NA	NA	NA	NA	NA	NA	NA	NA	NA	NA	NA	NA	NA	NA	NA	NA	NA	NA	NA	NA	NA	NA	NA	NA	NA	NA	NA	NA	NA	NA
ENSG00000268903	AL627309.6	processed_pseudogene	human	1.29345	0.649154	0.724527	0.344843	0.856737	0.733318	1.28061	1.20973	1.01061	1.62502	1.02089	1.50803	0.865947	1.1975	0.733099	2.79329	1.4205	1.93937	0.0699547	1.91219	1.91327	-2.70221	0.444677	-0.0394017	-1.26578	0.479988	-0.831582	1.87294	-0.00193254	1.84555	1.93292	2.48886	2.29351	3.36614	2.25025	2.60598	1.9086	1.80502	1.97905	1.55409	1.85742	1.57139	2.23506	1.95025	2.58654	1.44511
ENSG00000269981	AL627309.7	processed_pseudogene	human	0.721024	1.6276	0.894718	0.911045	0.938873	1.13129	0.469756	1.36406	0.84737	1.1055	1.2537	0.498789	0.653637	0.901399	0.872076	-1.51914	0.574751	-0.452054	-0.859829	-0.928365	0.138242	0.682311	-1.51584	0.592666	2.1613	-1.03751	1.09187	-0.034879	1.07119	1.00924	2.56189	1.65331	2.2285	2.22676	2.18375	2.04429	2.74349	1.75093	2.13147	1.95272	1.78496	2.70608	2.35384	2.11224	2.15322	-0.592979
ENSG00000239906	AL627309.2	lncRNA	human	0.171761	0.214529	0	0	0	0	0.168454	0.217613	0	0.376285	0.183172	0.146035	0	0	0	1.22054	0.941774	NA	NA	NA	NA	-1.13359	-0.980163	NA	-0.261152	-0.482655	-0.746246	NA	NA	NA	4.08047	4.06594	NA	NA	NA	NA	4.08047	4.06602	NA	3.16667	4.06596	4.08047	NA	NA	NA	0.299116
ENSG00000241860	AL627309.5	lncRNA	human	1.77874	3.67492	1.96094	1.44136	3.13258	1.78538	0.982814	4.54328	1.50073	3.01253	3.11204	1.49779	2.23157	2.47891	1.01808	-0.55874	0.970257	-0.0329639	-1.80255	0.730302	-0.406872	-1.23674	-0.230666	-0.375296	1.56536	-1.00478	0.541622	2.54823	-1.13636	1.41982	1.41541	1.0568	1.33929	1.76622	1.07385	1.43433	1.99393	0.921268	1.51661	1.19433	1.14991	1.51041	1.52957	1.25307	2.02804	-0.394754
ENSG00000222623	RNU6-1100P	snRNA	human	0	0	0	0	0	0	0	0	0	0	0	0	0	0	0	NA	NA	NA	NA	NA	NA	NA	NA	NA	NA	NA	NA	NA	NA	NA	NA	NA	NA	NA	NA	NA	NA	NA	NA	NA	NA	NA	NA	NA	NA	NA
ENSG00000241599	AL627309.4	lncRNA	human	0	0	0	0	0	0	0	0	0	0	0	0	0	0	0	NA	NA	NA	NA	NA	NA	NA	NA	NA	NA	NA	NA	NA	NA	NA	NA	NA	NA	NA	NA	NA	NA	NA	NA	NA	NA	NA	NA	NA	NA	NA
ENSG00000279928	FO538757.1	unprocessed_pseudogene	human	3.22006	3.31575	2.39965	2.73725	3.38236	2.84994	2.99521	3.73819	2.30513	3.54181	2.6765	2.61135	3.12928	3.19322	2.62838	0.435518	0.248331	-0.157086	-0.150423	0.287386	0.296391	-0.567505	0.0442462	0.448561	-0.146142	-0.391674	-0.578347	0.472572	0.00503331	0.454647	1.10068	1.14497	1.29222	1.22271	1.14138	1.23598	1.17227	1.16691	1.39889	1.09733	1.31575	1.25304	1.24276	1.26026	1.3465	0.395681
ENSG00000279457	WASH9P	unprocessed_pseudogene	human	49.9687	64.6204	56.3044	57.2986	70.1079	60.6782	37.3529	62.8473	47.4108	42.8124	49.9912	38.1922	55.622	59.0662	48.0222	-0.93025	-0.463153	-0.256649	-0.647535	-0.112472	-0.0989131	0.299155	0.351473	0.157918	0.499918	0.209446	0.690373	0.565498	0.0171213	0.559912	0.286305	0.249216	0.262351	0.260565	0.245295	0.259147	0.311643	0.256632	0.280179	0.297434	0.274132	0.31252	0.268309	0.265683	0.282417	-3.24916
ENSG00000273874	MIR6859-2	miRNA	human	0	0	0	0	0	0	0	0	0	0	0	0	0	0	0	NA	NA	NA	NA	NA	NA	NA	NA	NA	NA	NA	NA	NA	NA	NA	NA	NA	NA	NA	NA	NA	NA	NA	NA	NA	NA	NA	NA	NA	NA	NA
ENSG00000228463	AP006222.1	transcribed_processed_pseudogene	human	10.1637	14.1692	11.5647	9.91614	13.3437	11.1508	7.96639	15.2187	10.381	11.771	13.142	9.59694	10.8512	11.9688	8.97813	-0.319446	0.219243	0.247677	-0.630677	0.183068	0.104155	-0.294529	-0.0327205	-0.144047	0.574399	0.0293355	0.583522	0.842656	-0.074278	0.744312	0.601219	0.529914	0.567723	0.620813	0.527639	0.586907	0.666609	0.507565	0.595367	0.568045	0.544782	0.613028	0.594171	0.561894	0.655846	-0.531331
ENSG00000286448	AP006222.2	lncRNA	human	0.169606	0.194015	0.158492	0.180913	0.187804	0.161958	0	0	0	0	0	0	0	0	0	-0.703018	-1.09864	-0.50416	-0.89183	-1.00226	-0.569223	NA	NA	NA	NA	NA	NA	NA	NA	NA	4.08047	4.08047	4.08047	4.08047	4.08047	4.08047	NA	NA	NA	NA	NA	NA	NA	NA	NA	-0.172288
ENSG00000236679	RPL23AP24	processed_pseudogene	human	0	0	0	0	0	0	0	0	0	0	0	0	0	0	0	NA	NA	NA	NA	NA	NA	NA	NA	NA	NA	NA	NA	NA	NA	NA	NA	NA	NA	NA	NA	NA	NA	NA	NA	NA	NA	NA	NA	NA	NA	NA
ENSG00000236601	AL732372.1	lncRNA	human	0	0	0	0	0	0	0	0	0	0	0	0	0	0	0	NA	NA	NA	NA	NA	NA	NA	NA	NA	NA	NA	NA	NA	NA	NA	NA	NA	NA	NA	NA	NA	NA	NA	NA	NA	NA	NA	NA	NA	NA	NA
ENSG00000237094	AL732372.2	transcribed_unprocessed_pseudogene	human	4.20876	3.9925	2.86659	4.14594	4.9925	4.90017	4.23643	4.90095	3.60061	4.10299	2.71919	2.98892	4.99659	5.65764	4.87345	0.288402	-0.176701	-0.65724	0.0800021	0.452465	0.747249	-0.190859	0.616628	1.40957	-0.421136	-0.463587	-0.932929	0.402445	0.296619	0.677276	0.943214	1.00356	1.2357	0.968532	0.885658	0.907267	0.915172	0.898434	1.11122	0.941232	1.26078	1.17343	0.871341	0.819916	0.89179	0.305765
ENSG00000269732	WBP1LP7	processed_pseudogene	human	0	0	0	0	0	0	0	0	0	0	0	0	0	0	0	NA	NA	NA	NA	NA	NA	NA	NA	NA	NA	NA	NA	NA	NA	NA	NA	NA	NA	NA	NA	NA	NA	NA	NA	NA	NA	NA	NA	NA	NA	NA
ENSG00000284733	OR4F29	protein_coding	human	0	0	0	0	0	0	0	0	0	0	0	0	0	0	0	NA	NA	NA	NA	NA	NA	NA	NA	NA	NA	NA	NA	NA	NA	NA	NA	NA	NA	NA	NA	NA	NA	NA	NA	NA	NA	NA	NA	NA	NA	NA
ENSG00000233653	CICP7	processed_pseudogene	human	0.2994	0.344826	0.279873	0.319341	0.333798	0.285387	0	0	0	0	0	0	0	0	0	-1.58516	-1.98473	-1.38523	-1.7729	-1.88843	-1.44701	NA	NA	NA	NA	NA	NA	NA	NA	NA	3.78133	3.6193	3.88909	3.71188	3.60209	3.94076	NA	NA	NA	NA	NA	NA	NA	NA	NA	-0.419206
ENSG00000250575	AL732372.3	unprocessed_pseudogene	human	0	0	0	0.153878	0	0	0.141911	0	0	0	0	0	0.154182	0	0.133614	NA	NA	NA	1.03172	NA	NA	0.789963	NA	NA	NA	NA	NA	-1.04106	NA	-0.628535	NA	NA	NA	4.08047	NA	NA	4.08047	NA	NA	NA	NA	NA	4.08047	NA	4.08047	NA
ENSG00000278757	FO681485.1	snRNA	human	0	0.0922998	0	0	0	0	0	0.0939515	0	0.085237	0.0788701	0	0	0	0	NA	0.766694	NA	NA	NA	NA	NA	-0.806158	NA	0.54332	-0.30784	NA	NA	NA	NA	NA	4.0717	NA	NA	NA	NA	NA	4.07175	NA	4.07162	4.07171	NA	NA	NA	NA	NA
ENSG00000230021	AL669831.3	transcribed_processed_pseudogene	human	2.30348	2.58954	2.30241	3.25991	3.29948	1.71657	2.87826	3.26616	1.49522	2.23734	2.24983	2.00236	3.89936	2.26388	2.25147	-0.152898	-0.176722	0.0445243	0.621344	0.538264	-1.03785	0.7925	0.706126	-1.08665	0.00894407	0.223681	0.213722	-0.0545289	-1.57277	-1.64668	1.25305	1.24167	1.24057	1.0928	1.04652	1.54607	1.15173	1.09613	1.58901	1.30291	1.30365	1.31155	0.975548	1.37999	1.43234	-0.122021
ENSG00000235146	AC114498.1	lncRNA	human	0	0	0	0	0	0	0	0	0	0	0	0	0	0	0	NA	NA	NA	NA	NA	NA	NA	NA	NA	NA	NA	NA	NA	NA	NA	NA	NA	NA	NA	NA	NA	NA	NA	NA	NA	NA	NA	NA	NA	NA	NA
ENSG00000225972	MTND1P23	unprocessed_pseudogene	human	0.310455	0.526435	0.331123	0.454138	0.477658	0.131509	0.452697	0.715044	0.177629	0.521131	0.52843	0.334023	0.6276	0.281761	0.267228	0.258768	1.12804	0.457628	0.858881	0.849796	-0.569223	0.618153	-0.318555	-1.02734	0.91195	-0.674609	0.21554	0.0112146	-1.4084	-1.40283	3.47321	2.86649	3.39814	3.04232	2.95621	4.08047	2.96277	2.52034	4.08047	2.78113	2.81589	3.32598	2.66581	3.87086	4.00835	0.074504
ENSG00000225630	MTND2P28	unprocessed_pseudogene	human	1329.94	1464.44	1237.08	1603.81	1519.71	1182.46	1290.85	1315.82	851.501	1142.84	1061.86	971.441	1465.79	1053.69	1137.15	-0.405722	-0.54842	-0.424966	-0.0253643	-0.313872	-0.666324	0.396752	0.235546	-0.241301	-0.107731	0.124763	-0.0026237	-0.25758	-0.346483	-0.62929	0.0821318	0.100422	0.0755087	0.07139	0.0910682	0.114994	0.0826724	0.192973	0.120732	0.185492	0.104541	0.0876339	0.0882655	0.211434	0.115665	-4.93989
ENSG00000237973	MTCO1P12	unprocessed_pseudogene	human	101.85	115.744	96.4514	114.812	117.348	101.761	84.3632	97.0528	70.3006	83.2194	79.0818	69.7603	97.3534	85.8841	84.2718	-0.613258	-0.623972	-0.571789	-0.425729	-0.479095	-0.465011	0.204349	0.149034	0.106425	0.0209167	0.0565193	0.0583404	-0.0239356	0.0181589	-0.028757	0.217639	0.210962	0.212943	0.20778	0.210035	0.218178	0.233458	0.231112	0.237562	0.235933	0.233968	0.240892	0.227587	0.23727	0.235363	-2.81778
ENSG00000278791	AC114498.2	miRNA	human	0	0	0	0	0	0.211506	0	0	0.181205	0	0	0	0	0.21503	0.207607	NA	NA	NA	NA	NA	1.35433	NA	NA	0.896211	NA	NA	NA	NA	1.3971	1.29502	NA	NA	NA	NA	NA	4.08047	NA	NA	4.08047	NA	NA	NA	NA	4.08047	4.08047	NA
ENSG00000229344	MTCO2P12	unprocessed_pseudogene	human	4.03016	5.8636	3.86197	5.26744	4.44703	3.20137	3.80372	4.70948	1.94845	4.26821	4.07563	2.62561	4.16905	2.19715	2.96785	-0.770838	0.0781915	-0.636598	-0.0657455	-0.770581	-1.65404	0.719481	-0.845068	-1.00691	0.877826	-0.693321	0.145835	-0.67292	-0.873309	-1.57242	1.03839	0.8489	1.11036	0.882036	0.959496	1.22685	0.98489	0.887497	1.46094	0.946468	1.02381	1.25321	0.922238	1.3039	1.19085	-0.742338
ENSG00000240409	MTATP8P1	unprocessed_pseudogene	human	0	0	0	0	0	0	0	0	0	0	0	0	0	0	0	NA	NA	NA	NA	NA	NA	NA	NA	NA	NA	NA	NA	NA	NA	NA	NA	NA	NA	NA	NA	NA	NA	NA	NA	NA	NA	NA	NA	NA	NA	NA
ENSG00000248527	MTATP6P1	unprocessed_pseudogene	human	1253.68	1413.35	1160.8	1490.56	1468.9	1237.78	1029.09	1112.22	762.171	928.05	855.36	764.314	1210.24	983.133	1012.93	-0.81859	-0.891513	-0.861051	-0.425212	-0.616732	-0.697796	0.409862	0.27425	0.161192	-0.0364491	0.0280899	-0.0269569	-0.161145	-0.0774598	-0.262878	0.21404	0.237745	0.207704	0.274985	0.23381	0.347898	0.219299	0.186538	0.297111	0.175212	0.106307	0.0945061	0.222891	0.314858	0.341449	-3.82447
ENSG00000198744	MTCO3P12	unprocessed_pseudogene	human	3.34259	4.00149	3.89457	3.48183	4.06085	3.72766	2.49362	3.60591	3.261	2.91153	3.52874	2.95531	3.10612	3.38358	2.88119	-0.662395	-0.469656	0.0449097	-0.718449	-0.33977	-0.16062	-0.0373696	0.129643	-0.206212	0.231962	0.515872	0.728235	0.410425	0.17793	0.569562	1.13702	1.0204	1.08313	1.10641	0.998126	1.09905	1.20797	0.989579	1.13058	1.11252	1.06166	1.17724	1.07562	1.05955	1.1721	-0.582569
ENSG00000268663	WBP1LP6	processed_pseudogene	human	0	0	0	0	0	0	0	0	0	0	0	0	0	0	0	NA	NA	NA	NA	NA	NA	NA	NA	NA	NA	NA	NA	NA	NA	NA	NA	NA	NA	NA	NA	NA	NA	NA	NA	NA	NA	NA	NA	NA	NA	NA
ENSG00000284662	OR4F16	protein_coding	human	0	0	0	0	0	0	0	0	0	0	0	0	0	0	0	NA	NA	NA	NA	NA	NA	NA	NA	NA	NA	NA	NA	NA	NA	NA	NA	NA	NA	NA	NA	NA	NA	NA	NA	NA	NA	NA	NA	NA	NA	NA
ENSG00000229376	CICP3	processed_pseudogene	human	0	0	0	0	0	0	0	0	0	0	0	0	0	0	0	NA	NA	NA	NA	NA	NA	NA	NA	NA	NA	NA	NA	NA	NA	NA	NA	NA	NA	NA	NA	NA	NA	NA	NA	NA	NA	NA	NA	NA	NA	NA
ENSG00000228327	AL669831.1	transcribed_unprocessed_pseudogene	human	58.7126	78.3449	65.6539	69.1201	74.7138	67.728	46.7566	69.7621	53.2576	53.8468	61.5144	45.4951	60.9868	60.3665	55.6883	-0.868782	-0.286406	-0.227409	-0.493376	-0.364398	-0.206502	0.391927	-0.0763221	0.022515	0.611264	0.0661592	0.657031	0.159976	0.161271	0.298934	0.265542	0.242524	0.255422	0.238539	0.226916	0.249589	0.284462	0.250388	0.282817	0.285279	0.277596	0.303191	0.246966	0.256559	0.269544	-3.27173
ENSG00000223181	RNU6-1199P	snRNA	human	2.03586	0.366428	0.701493	1.67394	1.29129	0.681271	2.89752	0.985833	0.673891	1.77666	0.423873	1.82866	2.26435	1.19865	1.52738	2.45548	-2.05461	0.442747	2.02153	1.46057	0.334091	-0.40155	3.48659	-0.108253	-4.44254	2.49686	-1.98591	-0.519036	-1.11045	-1.65659	1.59401	3.25935	2.44574	1.64936	1.78194	2.37892	1.15727	2.11693	2.45192	1.7838	3.2833	1.66082	1.28101	1.82455	1.69486	1.54045
ENSG00000229905	AL669831.2	lncRNA	human	0	0	0	0	0	0	0	0	0	0	0	0	0	0	0	NA	NA	NA	NA	NA	NA	NA	NA	NA	NA	NA	NA	NA	NA	NA	NA	NA	NA	NA	NA	NA	NA	NA	NA	NA	NA	NA	NA	NA	NA	NA
ENSG00000237491	LINC01409	lncRNA	human	27.296	38.4493	25.8558	33.5081	38.3064	29.4681	24.0748	39.5157	19.8275	28.0501	26.4943	17.7829	34.4392	30.165	26.0906	-0.726729	-0.0239871	-0.682403	-0.241278	0.0320183	-0.301321	0.501607	0.0539497	0.379748	0.733683	-0.652258	0.0613858	0.302362	-0.329503	-0.0492088	0.396842	0.33592	0.405644	0.361527	0.336005	0.401043	0.402058	0.318771	0.450979	0.372593	0.386422	0.455111	0.343858	0.381021	0.409824	-1.83128
ENSG00000285268	AL669831.6	transcribed_processed_pseudogene	human	0	0	0	0	0	0	0	0	0	0	0	0	0	0	0	NA	NA	NA	NA	NA	NA	NA	NA	NA	NA	NA	NA	NA	NA	NA	NA	NA	NA	NA	NA	NA	NA	NA	NA	NA	NA	NA	NA	NA	NA	NA
ENSG00000230092	AL669831.4	transcribed_unprocessed_pseudogene	human	8.50499	8.71413	6.81297	7.6541	6.96476	4.72402	8.52167	8.05523	4.28596	9.56004	7.75758	7.52889	7.00543	4.10871	4.77049	0.554021	0.302638	0.137497	0.0985145	-0.300869	-1.27833	-0.441182	-0.600438	-1.41522	-0.208527	-0.164117	-0.398751	-0.366176	-0.970219	-1.36355	0.712613	0.712907	0.784999	0.736862	0.783135	0.998173	0.653711	0.705735	0.976345	0.629292	0.70587	0.706549	0.730515	1.00252	0.941621	0.77745
ENSG00000177757	FAM87B	lncRNA	human	0.169606	0.286315	0.158492	0.180913	0.187804	0.161958	0	0.0939515	0	0.085237	0.0788701	0	0	0	0	-0.703018	-0.193035	-0.50416	-0.89183	-1.00226	-0.569223	NA	-0.806158	NA	0.54332	-0.30784	NA	NA	NA	NA	4.08047	3.60511	4.08047	4.08047	4.08047	4.08047	NA	4.07175	NA	4.07162	4.07171	NA	NA	NA	NA	-0.172288
ENSG00000228794	LINC01128	lncRNA	human	388.669	458.661	346.767	413.505	448.939	362.137	423.198	536.459	330.808	466.236	418.175	354.924	485.103	424.801	392.585	0.332279	0.402266	0.209393	0.322911	0.430477	0.266062	0.00769947	0.0289815	0.056403	0.105838	-0.19167	-0.106202	0.138301	-0.161947	-0.0464377	0.10474	0.104799	0.111133	0.1054	0.105586	0.116141	0.100767	0.100468	0.11781	0.100297	0.106856	0.107079	0.102308	0.112372	0.113695	3.1724
ENSG00000225880	LINC00115	lncRNA	human	27.9093	38.2329	32.5385	36.2482	43.8799	30.522	27.934	46.0206	27.1945	29.2846	34.0643	25.1017	43.4935	36.8201	30.2188	-0.577499	-0.0074801	0.110238	0.038831	0.4393	-0.138075	0.635187	0.446792	-0.249059	0.606561	0.118409	0.705561	0.433149	-0.57632	-0.16687	0.381453	0.320229	0.342627	0.333039	0.302418	0.36138	0.374101	0.288512	0.363789	0.360574	0.326929	0.387085	0.301175	0.327036	0.359337	-1.51395
ENSG00000288531	AL669831.7	lncRNA	human	0.306462	0.750379	0.286742	1.16773	1.56158	0.623693	0.777792	1.69428	0.282557	0.368651	0.340913	0	2.0543	1.40149	1.05353	-1.61085	0.23092	-1.41253	1.37622	1.83192	0.245427	2.99946	1.57768	1.62401	1.85056	-1.6145	NA	0.479762	-1.54522	-1.09515	3.44327	2.24824	3.53436	1.95059	1.71514	2.58256	2.39504	1.60543	3.82153	3.10157	3.25204	NA	1.44888	1.83789	2.11969	-0.467826
ENSG00000230368	FAM41C	lncRNA	human	0.306462	0.351251	0.489614	0.327295	0.339997	0.655455	0	0	0.485728	0	0.21295	0.186253	0	0.366363	0.352416	-1.61085	-2.0041	-0.447858	-1.79993	-1.90766	0.336592	NA	NA	0.776485	NA	1.55757	1.17731	NA	2.23423	2.12988	3.44327	3.31002	2.76447	3.38218	3.29577	2.40761	NA	NA	2.74354	NA	4.08047	4.08047	NA	3.22478	3.311	-0.467826
ENSG00000234711	TUBB8P11	unprocessed_pseudogene	human	0.171761	0	0	0	0.162733	0.211506	0.168454	0.169619	0.181205	0.178107	0	0.146035	0.159618	0.355911	0.207607	1.22054	NA	NA	NA	0.921293	1.35433	-1.13359	1.0595	0.896211	-1.32153	NA	-0.746246	0.88249	0.435331	1.29502	4.08047	NA	NA	NA	4.08047	4.08047	4.08047	4.08047	4.08047	4.08047	NA	4.08047	4.08047	3.30674	4.08047	0.299116
ENSG00000283040	AL669831.5	transcribed_unprocessed_pseudogene	human	0	0	0	0	0	0.211506	0	0	0.181205	0	0	0	0	0.21503	0.207607	NA	NA	NA	NA	NA	1.35433	NA	NA	0.896211	NA	NA	NA	NA	1.3971	1.29502	NA	NA	NA	NA	NA	4.08047	NA	NA	4.08047	NA	NA	NA	NA	4.08047	4.08047	NA
ENSG00000272438	AL645608.6	lncRNA	human	6.41424	7.76872	10.4257	9.52508	8.79294	6.74123	6.34609	6.76111	7.59648	4.52064	8.86782	7.44534	8.60662	5.87758	6.58199	-1.16999	-0.917343	0.579891	-0.00109862	-0.354328	-0.783032	1.18853	0.562504	-1.37088	0.284432	1.49836	1.77064	-0.326605	-0.422578	-0.777713	0.801424	0.707473	0.60368	0.629741	0.687227	0.801283	0.78642	0.771196	0.746763	0.891073	0.663051	0.751878	0.684012	0.863802	0.796009	-1.45989
ENSG00000230699	AL645608.2	lncRNA	human	60.9912	70.4179	69.7455	65.2262	73.6526	70.8842	31.5313	44.1013	47.9292	34.051	45.1458	39.0741	40.7097	48.9152	42.152	-1.49249	-1.44477	-0.60173	-1.4774	-1.07703	-0.63324	0.0312503	0.370708	-0.0319352	0.0804824	0.84568	0.9064	0.431885	0.446051	0.854975	0.29214	0.266891	0.270679	0.275511	0.258244	0.28566	0.341687	0.294956	0.313178	0.331249	0.300763	0.327752	0.303891	0.30605	0.325539	-5.10882
ENSG00000241180	AL645608.4	lncRNA	human	0	0	0	0	0	0	0	0	0	0	0	0	0	0	0	NA	NA	NA	NA	NA	NA	NA	NA	NA	NA	NA	NA	NA	NA	NA	NA	NA	NA	NA	NA	NA	NA	NA	NA	NA	NA	NA	NA	NA	NA	NA
ENSG00000223764	LINC02593	lncRNA	human	205.182	245.559	263.919	221.769	261.347	251.806	82.701	140.882	177.016	95.1767	164.414	136.123	124.351	164.654	132.752	-2.01	-1.70239	-0.481757	-1.91883	-1.21234	-0.737032	0.107229	0.49233	-0.256107	0.337648	1.21948	1.54603	0.738012	0.47782	1.19359	0.186307	0.176836	0.157054	0.17818	0.163524	0.172076	0.221334	0.185659	0.161551	0.215893	0.171395	0.18178	0.187975	0.172459	0.191593	-10.7886
ENSG00000187634	SAMD11	protein_coding	human	914.312	982.295	1198.34	961.708	1036.62	1252.13	404.417	451.093	969.449	385.073	720.754	679.693	467.985	813.664	752.826	-1.71668	-2.1749	-0.275481	-1.81253	-1.5977	-0.206595	-0.0790641	0.580219	0.0689323	-0.422937	1.89921	1.45761	0.246058	1.39358	1.61685	0.0997145	0.111397	0.0881243	0.0953753	0.105676	0.097597	0.103263	0.127384	0.0813777	0.122303	0.0998262	0.0872548	0.10918	0.102607	0.0904212	-17.216
ENSG00000188976	NOC2L	protein_coding	human	3875.55	4221.4	3442.26	4241.53	4060.54	3509.2	4104.26	4285.95	3011.96	4081.95	3627.98	3329.41	4296.81	3549	3705.29	0.161172	0.012166	0.0156863	0.228365	-0.00493235	0.00772116	0.0840193	-0.0154409	-0.00864579	-0.113566	0.00482557	-0.12879	-0.202005	0.0147454	-0.210033	0.0548958	0.0694797	0.0690053	0.0554958	0.0603445	0.0742067	0.0448122	0.0617335	0.0809498	0.0602079	0.0730271	0.0614001	0.0495113	0.0697538	0.0683462	2.93595
ENSG00000187961	KLHL17	protein_coding	human	397.745	559.253	448.451	435.211	569.298	455.175	238.207	510.581	320.719	339.654	396.655	269.501	388.975	412.523	299.038	-1.27047	-0.444678	-0.506693	-1.15428	-0.285531	-0.533257	0.132796	0.158404	-0.0268204	0.862457	-0.0613113	0.780404	0.899666	-0.244855	0.631891	0.139788	0.127154	0.140785	0.135347	0.128941	0.137243	0.138379	0.112916	0.136	0.12399	0.126463	0.142473	0.122565	0.122196	0.130444	-9.08855
ENSG00000187583	PLEKHN1	protein_coding	human	189.869	245.076	187.118	203.811	246.927	183.379	181.782	280.893	160.464	218.714	214.249	166.49	236.644	211.907	174.42	-0.0852953	0.255224	0.0664754	-0.0687049	0.348888	-0.0572965	0.0342248	0.0922164	-0.124409	0.377236	-0.188464	0.169342	0.449504	-0.404612	0.0222407	0.17042	0.151385	0.163133	0.161262	0.145634	0.17142	0.163852	0.132029	0.167005	0.153491	0.148514	0.167744	0.140984	0.150467	0.167085	-0.5005
ENSG00000187642	PERM1	protein_coding	human	8.81476	9.10134	15.454	7.55386	10.2589	14.64	3.22485	5.33024	15.6978	4.34346	11.6319	10.923	4.04857	11.5757	9.13916	-1.32	-1.88384	0.703364	-2.99962	-1.10305	0.50703	-1.66926	0.795571	-0.19617	-0.549005	2.58296	2.03844	1.93185	1.61534	3.52064	0.696059	0.694524	0.51329	0.898401	0.614806	0.512073	1.16492	0.83826	0.502956	0.925956	0.661496	0.666066	1.06163	0.595156	0.86728	-1.89639
ENSG00000272512	AL645608.7	lncRNA	human	39.0986	51.382	63.8703	49.688	54.2885	64.6215	41.3422	58.5614	75.3969	42.4624	68.2676	54.7505	56.3161	70.6723	65.7845	-0.33395	0.0830338	1.0925	0.180854	0.313908	1.06618	0.533831	0.230507	-0.0262069	0.455541	1.00981	1.44527	0.165699	0.754969	0.898377	0.338845	0.298955	0.293944	0.304677	0.284783	0.276953	0.307513	0.25392	0.249959	0.301412	0.263745	0.297383	0.260179	0.235322	0.252768	-0.985555
ENSG00000188290	HES4	protein_coding	human	112.695	121.528	116.876	111.025	103.975	115.585	109.999	111	115.425	119.738	124.053	113.972	100.934	106.636	112.151	0.210264	0.0262699	0.477807	-0.0170277	-0.339057	0.391997	-0.210539	-0.364066	-0.0864244	-0.149198	0.451968	0.283611	-0.290818	0.732856	0.419211	0.19098	0.188183	0.199603	0.193195	0.202255	0.197235	0.184671	0.192795	0.198238	0.179362	0.189518	0.193079	0.198761	0.200754	0.192656	1.10097
ENSG00000187608	ISG15	protein_coding	human	33.5214	42.9723	40.2165	30.9836	45.4481	41.9896	29.2356	53.3569	44.2383	40.2226	46.8577	37.5209	40.5459	50.5211	37.4973	0.0748027	0.390732	0.714134	-0.370378	0.583891	0.75239	-0.428317	0.193779	0.0377012	0.351511	0.325322	0.65555	0.987476	0.169883	1.13376	0.331064	0.303073	0.320372	0.355802	0.301634	0.312179	0.357844	0.284316	0.309435	0.305339	0.300896	0.326519	0.330446	0.294719	0.339971	0.225946
ENSG00000231702	AL645608.3	processed_pseudogene	human	0	0	0	0	0	0	0	0	0	0	0	0	0	0	0	NA	NA	NA	NA	NA	NA	NA	NA	NA	NA	NA	NA	NA	NA	NA	NA	NA	NA	NA	NA	NA	NA	NA	NA	NA	NA	NA	NA	NA	NA	NA
ENSG00000224969	AL645608.1	lncRNA	human	0.171761	0.0922998	0.360371	0	0.295833	0.423011	0.168454	0.405733	0.67605	0.263344	0.456191	0.476409	0.291858	0.688058	0.415215	1.22054	0.766694	2.22434	NA	1.69434	2.37688	-1.13359	0.937201	0.125194	-0.416287	1.45802	1.02699	1.65626	0.645346	2.32364	4.08047	4.0717	3.52307	NA	3.77676	3.38103	4.08047	3.11753	2.59677	3.5844	2.98717	2.92735	3.77751	2.60832	3.37483	0.299116
ENSG00000188157	AGRN	protein_coding	human	6912.26	8208.13	6333.08	7695.27	7801.18	6529.53	6984.42	8380.53	5390.4	7419.86	6796.92	5717.46	7841.7	6639.78	6550.63	-0.0334997	0.0635488	-0.0951242	0.0859426	0.0107137	-0.0702181	0.136259	-0.0510228	0.0237874	0.132711	-0.157141	-0.0447662	-0.0437869	-0.0790134	-0.145903	0.0640953	0.0700549	0.0642829	0.0570782	0.05913	0.0764093	0.095478	0.0671623	0.0800894	0.071518	0.0724126	0.0668923	0.0558677	0.0747004	0.0729922	-0.522654
ENSG00000242590	AL645608.5	lncRNA	human	0	0	0	0	0	0	0	0	0	0	0	0	0	0	0	NA	NA	NA	NA	NA	NA	NA	NA	NA	NA	NA	NA	NA	NA	NA	NA	NA	NA	NA	NA	NA	NA	NA	NA	NA	NA	NA	NA	NA	NA	NA
ENSG00000217801	AL390719.1	transcribed_unprocessed_pseudogene	human	55.9732	81.0362	57.8861	62.1965	82.039	60.9082	73.3773	122.655	70.4104	91.6844	91.3654	67.1256	100.697	95.0811	76.8907	0.892976	1.38289	1.10469	0.97595	1.46633	1.16924	0.0979252	0.0818068	0.0631054	0.524294	-0.275576	0.22848	0.52114	-0.293035	0.204696	0.268173	0.242824	0.290113	0.263646	0.233057	0.264934	0.232658	0.189252	0.260454	0.213984	0.240275	0.26181	0.204916	0.208668	0.235328	3.32986
ENSG00000273443	AL645608.8	lncRNA	human	4.86777	5.94155	4.0538	7.57133	4.64709	4.55839	10.2036	9.10434	6.16433	8.9121	7.80837	6.5338	10.5008	7.16257	9.58458	2.41284	2.49892	2.21831	3.05606	2.15623	2.38466	0.664302	-0.331337	0.164799	0.114757	-0.268686	-0.174615	-0.8676	0.231727	-0.659025	1.01318	0.949014	1.04926	0.883374	1.01289	1.02169	0.614631	0.663	0.759605	0.664539	0.699041	0.761387	0.609034	0.729083	0.628665	2.38144
ENSG00000237330	RNF223	protein_coding	human	2.28535	1.17743	0.518863	1.22005	0.64637	1.30895	3.0116	1.48149	1.29225	3.09963	1.21743	2.12584	1.49638	1.56166	2.02242	3.68049	2.40917	1.27228	2.572	1.36743	2.87712	-1.08596	-1.0244	1.57682	-1.2149	-1.11062	-2.35547	-1.15297	1.49004	0.318063	1.69717	1.94959	2.89508	1.93993	2.47709	1.90756	1.18554	1.60542	1.80692	1.16119	1.8467	1.62217	1.60889	1.58545	1.33685	2.16861
ENSG00000131591	C1orf159	protein_coding	human	454.346	521.172	394.73	497.662	516.027	403.468	492.565	584.465	347.722	514.666	449.517	391.796	555.824	453.735	437.353	0.232242	0.23005	0.0264269	0.297736	0.288602	0.0243513	0.0821041	0.0598141	-0.00305164	0.0335764	-0.20258	-0.189347	0.0222423	-0.262706	-0.263712	0.098838	0.0980213	0.106201	0.0959962	0.0972444	0.116373	0.0910463	0.0912128	0.118396	0.0925041	0.100439	0.102043	0.0902461	0.109839	0.109388	2.34973
ENSG00000285812	AL390719.3	lncRNA	human	0	0	0.58459	0	0	0	0	0	0.510152	0	0.613546	0.537273	0	0	0	NA	NA	2.90142	NA	NA	NA	NA	NA	-2.50949	NA	3.03961	2.65942	NA	NA	NA	NA	NA	2.54017	NA	NA	NA	NA	NA	2.62187	NA	2.48556	2.56583	NA	NA	NA	NA
ENSG00000223823	LINC01342	lncRNA	human	0	0.199842	0.383058	0	0	0.196875	0	0.203333	0.501269	0.185554	0.57234	0.35144	0	0.198997	0.190834	NA	0.941774	2.29685	NA	NA	1.35433	NA	-0.980163	-0.945193	0.720002	1.39554	2.05276	NA	1.3971	1.29502	NA	4.06594	3.17859	NA	NA	4.08047	NA	4.06602	2.71581	4.06582	2.61123	3.2177	NA	4.08047	4.08047	NA
ENSG00000207730	MIR200B	miRNA	human	2.60968	1.31665	0.945541	2.27184	1.03962	0.974737	3.40674	0.971119	0.636123	2.61061	0.888963	2.01677	1.94888	0.682652	1.7606	1.69415	-0.253154	-0.635271	1.26776	-1.032	-0.650162	-0.412236	-0.776809	-0.000170408	-1.91077	-0.38039	-2.28153	-2.27053	0.377728	-1.90063	1.26225	1.63749	2.05162	1.43401	1.90684	1.97598	1.13011	1.94424	2.49799	1.25144	2.07701	1.5803	1.6764	2.34056	1.74729	1.34216
ENSG00000207607	MIR200A	miRNA	human	0.54312	0.0922998	0	1.20655	0.675022	0.361988	1.64322	0.804762	0.308099	0.647817	0.0788701	0.461307	1.87829	0.954993	1.39981	2.6995	0.766694	NA	3.75156	2.85067	2.19249	1.06488	2.06856	1.73095	-1.88482	-0.30784	-2.22467	-0.8784	-0.635134	-1.52506	2.77011	4.0717	NA	1.96726	2.38388	3.30694	1.52355	2.16626	3.39699	2.42044	4.07171	2.88244	1.38837	1.96027	1.72565	0.974507
ENSG00000198976	MIR429	miRNA	human	1.79957	0.341835	0.509968	1.01388	1.14804	0.131509	2.41712	1.22865	0.332523	1.8927	0.558337	1.76335	1.85041	0.863778	0.753185	3.34441	0.350879	1.33323	2.31052	2.4565	-0.569223	-1.02043	2.02445	-1.89856	-2.82419	0.950536	-1.98477	0.174521	-3.0196	-2.87142	1.72613	3.37306	2.73068	2.04288	2.09036	4.08047	1.22797	2.00427	3.3027	1.6076	2.60933	1.58701	1.47856	2.36821	2.30798	1.93752
ENSG00000272141	AL390719.2	lncRNA	human	8.56223	5.10472	2.04626	9.94777	6.85278	4.54782	16.0163	10.5934	4.41978	11.9747	4.99776	7.84077	15.0837	9.09488	11.658	3.35902	2.27567	0.90543	3.48925	2.82065	2.38746	0.142546	0.533764	1.47097	-1.03338	-1.36219	-2.41708	-0.637076	-0.430083	-1.08768	0.890199	1.09948	1.42626	0.860692	0.934364	1.09134	0.488888	0.659817	0.980312	0.617876	0.994318	0.809356	0.511194	0.667952	0.613685	3.77334
ENSG00000205231	TTLL10-AS1	lncRNA	human	0	0	0.202873	0	0	0.165113	0	0	0.318907	0	0.21295	0.186253	0	0.167366	0.161583	NA	NA	1.41939	NA	NA	1.35433	NA	NA	-0.0655588	NA	1.55757	1.17731	NA	1.3971	1.29502	NA	NA	4.08047	NA	NA	4.08047	NA	NA	3.40107	NA	4.08047	4.08047	NA	4.08047	4.08047	NA
ENSG00000162571	TTLL10	protein_coding	human	0	0	0.383058	0	0.147916	0	0	0.155891	0.334448	0	0.40161	0.35144	0.145929	0.128999	0	NA	NA	2.29685	NA	0.921293	NA	NA	1.0595	-1.90509	NA	2.43416	2.05276	0.88249	-0.526457	NA	NA	NA	3.17859	NA	4.08047	NA	NA	4.08047	3.29573	NA	3.10078	3.2177	4.08047	4.08047	NA	NA
ENSG00000186891	TNFRSF18	protein_coding	human	0.136856	0.357077	0.308435	0.331554	0.152193	0.343014	0.170448	0.203333	0.338025	0.185554	0.35939	0.165187	0.185776	0.21503	0.368205	-0.703018	-0.0344687	0.457627	0.0699544	-1.00226	0.392564	0.789963	-0.980163	-0.0655585	0.720002	0.495297	1.17731	-1.04106	1.3971	0.333252	4.08047	3.33558	3.48569	3.41348	4.08047	3.4192	4.08047	4.06602	3.33172	4.06582	3.2717	4.08047	4.08047	4.08047	3.30703	-0.172288
ENSG00000186827	TNFRSF4	protein_coding	human	1.68504	2.52744	1.23542	1.48888	2.85725	1.69224	1.55831	3.83372	1.30779	2.52253	1.99606	1.29534	2.69885	2.76219	1.56246	0.312652	1.00839	-0.324775	-0.213931	1.30498	0.437778	-0.50911	0.287769	0.769287	0.737841	-1.31483	-0.631991	1.55618	-0.871085	0.66375	1.50794	1.24567	1.80785	1.53709	1.19263	1.46408	1.5557	1.01645	1.76494	1.26242	1.52098	1.86075	1.25264	1.20778	1.52692	0.207337
ENSG00000078808	SDF4	protein_coding	human	2327.86	2645.17	2174.92	2538.76	2550.67	2146.44	2307.28	2624.35	1810.96	2392.84	2235.19	1967.66	2516.11	2119.84	2113.28	-0.0285635	-0.0607643	-0.0322814	0.0331731	-0.0709048	-0.136218	0.0786604	-0.00848349	-0.104662	0.00279472	0.0301256	0.0127045	-0.0728277	-0.0632484	-0.158907	0.0682342	0.0727977	0.0718158	0.0691637	0.0747975	0.0804382	0.0525441	0.0588799	0.0701342	0.0553311	0.0596839	0.055687	0.0585794	0.0698209	0.0679191	-0.418609
ENSG00000176022	B3GALT6	protein_coding	human	648.152	757.465	620.658	695.485	746.388	601.426	657.698	821.182	542.227	713.412	682.089	584.311	753.642	651.3	606.804	0.0887909	0.140054	0.154198	0.102794	0.186524	0.00600995	0.0313216	0.0474826	-0.148974	0.0868646	0.0154343	0.0819095	0.11505	-0.178369	-0.0862612	0.0927671	0.0857464	0.0919889	0.0845644	0.0836339	0.0982152	0.0881447	0.0806499	0.10396	0.0900773	0.0902299	0.0972531	0.0808691	0.0943671	0.0969368	0.957138
ENSG00000184163	C1QTNF12	protein_coding	human	6.87013	11.1716	7.65075	7.52735	10.8211	7.32797	3.27361	10.3788	4.28592	6.35489	7.18724	3.82045	6.759	6.59837	3.83942	-1.72052	-0.274744	-0.868968	-1.59532	-0.254092	-1.15965	0.147684	0.0226789	-0.288591	1.48664	-0.596124	0.870507	1.37181	-0.902116	0.445666	0.835834	0.600459	0.730485	0.768519	0.599605	0.768465	1.063	0.593733	0.904755	0.822175	0.723237	0.997876	0.766282	0.763035	0.97623	-2.05845
ENSG00000260179	AL162741.1	lncRNA	human	3.29304	4.80767	3.41449	3.22506	4.89765	3.15142	3.22308	6.50906	3.20261	4.69199	4.72533	3.35306	4.79073	4.53173	3.06603	0.246149	0.811774	0.486819	0.0207607	0.946214	0.235355	-0.204953	0.142286	-0.249648	0.596804	-0.324941	0.257152	0.945687	-0.705289	0.22875	1.06675	0.92819	1.08645	1.15865	0.894601	1.12898	1.10271	0.758406	1.10136	0.889825	0.923303	1.05134	0.932951	0.925445	1.18652	0.230748
ENSG00000160087	UBE2J2	protein_coding	human	838.129	961.726	757.984	911.452	871.279	752.41	912.786	1005.64	682.964	960.616	870.979	759.043	950.345	785.063	818.793	0.269839	0.261619	0.178489	0.317459	0.0868054	0.0977548	0.0640756	-0.172549	-0.0811476	0.0271506	-0.0814471	-0.0748255	-0.199354	0.0131042	-0.209014	0.0801976	0.0891926	0.0810952	0.077509	0.0789233	0.0898366	0.0743199	0.0825644	0.0881491	0.0853106	0.0866252	0.0785921	0.0724621	0.0847856	0.0856268	3.36468
ENSG00000230415	LINC01786	lncRNA	human	15.947	18.6723	15.5893	15.601	20.7717	13.1484	8.8157	15.6782	7.22967	11.2022	11.1739	9.4602	12.797	10.5478	6.32531	-1.04757	-0.992359	-0.877077	-1.49379	-0.439589	-1.86032	-0.427829	0.556605	-0.984561	0.0924172	0.115025	0.18931	1.08465	-1.41593	-0.355956	0.541591	0.499213	0.545963	0.563048	0.460037	0.63408	0.647219	0.486007	0.722967	0.56905	0.57755	0.623354	0.553095	0.626705	0.775205	-1.93425
ENSG00000162572	SCNN1D	protein_coding	human	92.03	107.548	92.8222	102.128	118.034	100.895	64.7125	91.4921	67.8206	67.2351	69.9327	59.52	87.1414	87.3034	74.0173	-0.96382	-0.849998	-0.66517	-0.800302	-0.426395	-0.449102	0.178483	0.437089	0.216249	0.139772	0.19487	0.315554	0.408345	-0.0208044	0.363946	0.231762	0.220971	0.224864	0.217194	0.225182	0.215402	0.266173	0.260885	0.253289	0.268358	0.262657	0.27543	0.257534	0.255175	0.24884	-4.15866
ENSG00000131584	ACAP3	protein_coding	human	802.64	924.286	786.782	934.444	927.87	796.873	772.789	876.774	640.51	753.689	742.568	644.852	889.386	754.367	761.764	-0.313484	-0.296591	-0.167352	-0.0478992	-0.189816	-0.197297	0.282047	0.106919	-0.0305178	0.0537299	0.13008	0.162724	-0.110922	-0.0050247	-0.13876	0.103811	0.109568	0.107637	0.0996442	0.102413	0.111041	0.0898294	0.100131	0.105711	0.100924	0.105635	0.0991138	0.0893039	0.099743	0.0973357	-3.01974
ENSG00000278073	MIR6726	miRNA	human	0	0	0	0	0	0	0	0	0	0	0	0	0	0	0	NA	NA	NA	NA	NA	NA	NA	NA	NA	NA	NA	NA	NA	NA	NA	NA	NA	NA	NA	NA	NA	NA	NA	NA	NA	NA	NA	NA	NA	NA	NA
ENSG00000169972	PUSL1	protein_coding	human	244.478	290.059	212.235	261.023	257.439	218.802	266.393	311.998	194.757	293.949	257.544	217.294	280.707	235.742	238.344	0.325921	0.407821	0.124275	0.32298	0.18067	0.151236	0.0134775	-0.226157	0.026214	0.117573	-0.282394	-0.184715	-0.110878	-0.0272434	-0.161601	0.136221	0.124658	0.140168	0.136756	0.129876	0.14276	0.138292	0.120494	0.149036	0.126211	0.131389	0.143269	0.133317	0.139135	0.147351	2.39258
ENSG00000127054	INTS11	protein_coding	human	1405.58	1572.7	1275.61	1553.89	1558.55	1325.21	1431.73	1602.81	1101.33	1442.84	1308.66	1170.32	1580.15	1344.87	1340.67	0.0118306	-0.0626126	-0.0774721	0.110338	0.00387478	-0.0305144	0.115143	0.0684385	0.0457983	-0.0387572	-0.0133227	-0.072649	-0.0747717	-0.0327053	-0.1304	0.0646675	0.0720469	0.0703183	0.0698706	0.07533	0.0842213	0.0671942	0.0786373	0.0876137	0.0694248	0.0755338	0.0690712	0.0769122	0.0912243	0.0865991	0.182945
ENSG00000283712	MIR6727	miRNA	human	0	0	0	0	0	0	0	0	0	0	0	0	0	0	0	NA	NA	NA	NA	NA	NA	NA	NA	NA	NA	NA	NA	NA	NA	NA	NA	NA	NA	NA	NA	NA	NA	NA	NA	NA	NA	NA	NA	NA	NA	NA
ENSG00000240731	AL139287.1	lncRNA	human	33.3784	46.0815	32.5401	41.9077	46.7414	32.0544	29.9701	46.8934	21.3835	33.0987	32.2379	22.3132	42.5837	32.4389	28.5127	-0.76832	-0.125535	-0.620941	-0.217557	-0.0119866	-0.754453	0.566396	0.106587	-0.132249	0.680626	-0.497025	0.164117	0.235927	-0.737555	-0.524274	0.396245	0.350974	0.398699	0.357501	0.345467	0.411739	0.355228	0.301866	0.416222	0.347094	0.353784	0.40524	0.307894	0.360564	0.374725	-1.939
ENSG00000224051	CPTP	protein_coding	human	632.952	799.45	594.056	706.011	766.218	603.973	677.8	914.426	542.104	763.417	715.229	568.939	811.433	695.875	642.288	0.137272	0.388748	0.146042	0.257159	0.365051	0.132296	0.137593	-0.0225552	-0.0146374	0.287632	-0.242079	0.0253045	0.138971	-0.230655	-0.11464	0.0932428	0.0868259	0.100399	0.0859435	0.0904579	0.100448	0.0813265	0.0777089	0.105092	0.082229	0.0904471	0.0975267	0.0787199	0.0929808	0.090857	1.4722
ENSG00000169962	TAS1R3	protein_coding	human	10.4386	10.4236	9.59091	14.6657	12.1823	10.4968	13.4196	11.1218	8.75828	9.4379	8.66106	8.70644	15.3441	11.0699	13.2158	-0.0147478	-0.461757	-0.0755375	0.692454	0.11844	0.12199	0.721649	0.579981	0.197562	-0.410985	0.387179	-0.0434886	-0.543314	0.00687102	-0.559216	0.61192	0.597553	0.615583	0.509297	0.553587	0.59978	0.545709	0.584145	0.640782	0.633793	0.6454	0.659237	0.499465	0.586293	0.543377	-0.0241008
ENSG00000107404	DVL1	protein_coding	human	1811.12	2385.85	1860.78	1994.6	2185.21	1820.64	1983.68	2790.2	1826.9	2347.85	2367.19	1834.69	2364.17	2145.82	1970.25	0.249818	0.596743	0.489477	0.33083	0.46088	0.379323	0.0976777	-0.134726	-0.110446	0.382617	-0.105902	0.256364	0.161229	-0.0789951	0.0594773	0.0653893	0.066339	0.0639083	0.0624174	0.0614451	0.0767223	0.0603366	0.0594715	0.0760657	0.0642545	0.0637338	0.0625399	0.0566044	0.071583	0.0743296	3.82047
ENSG00000284372	MIR6808	miRNA	human	0	0	0	0	0	0	0	0	0	0	0	0	0	0	0	NA	NA	NA	NA	NA	NA	NA	NA	NA	NA	NA	NA	NA	NA	NA	NA	NA	NA	NA	NA	NA	NA	NA	NA	NA	NA	NA	NA	NA	NA	NA
ENSG00000162576	MXRA8	protein_coding	human	3.1243	5.60158	6.53082	3.86311	4.91581	5.75225	1.49993	4.77614	6.35446	2.9514	6.52457	4.20075	3.07535	5.06467	4.12269	-2.2823	-0.211848	0.755276	-1.40188	-0.530002	0.387691	0.924405	-0.318785	-0.366873	2.10973	0.971551	3.04509	0.903425	0.92159	1.80271	1.26457	0.816323	0.752998	1.10367	0.879034	0.816029	1.71001	0.886024	0.751715	1.25991	0.749615	1.15998	1.20172	0.875307	1.08878	-1.80481
ENSG00000175756	AURKAIP1	protein_coding	human	1178.65	1333.72	1038.48	1258.07	1245.87	1037.83	1248	1400.22	908.058	1318.7	1166.13	1030.19	1317.65	1087.88	1098.41	0.234071	0.190661	0.0685381	0.232573	0.0956311	0.00562987	0.0146625	-0.0917173	-0.0632246	-0.00905631	-0.120094	-0.149406	-0.105511	-0.0882121	-0.215857	0.085813	0.0884524	0.0887428	0.0799887	0.0847361	0.122649	0.0653185	0.0690211	0.117074	0.0735487	0.0764007	0.0751918	0.0618178	0.111137	0.11006	2.72769
ENSG00000223663	NDUFB4P8	processed_pseudogene	human	0.369204	0.194015	0.744422	0.334792	0.187804	0.373464	0.335121	0	0.693283	0.206365	0.61456	0.70693	0.154182	0.21503	0.341221	0.258769	-1.09864	1.94183	0.0699545	-1.00226	0.392565	-0.171807	NA	-1.5514	-1.32153	3.04157	1.69826	-1.04106	1.3971	0.333251	3.26654	4.08047	2.39047	3.40168	4.08047	3.31781	3.3039	NA	2.41572	4.08047	2.63975	2.3902	4.08047	4.08047	3.39708	0.0792181
ENSG00000221978	CCNL2	protein_coding	human	1782.52	2058.85	1669.29	2051.73	2084.83	1685.65	1586.97	1851.15	1192.85	1564.54	1464.87	1266.5	1856.5	1504.95	1486.96	-0.494409	-0.471757	-0.490893	-0.245981	-0.321949	-0.535349	0.264648	0.147985	-0.0453564	0.0605419	-0.0210858	0.0198852	-0.045205	-0.210672	-0.278867	0.194943	0.180987	0.186813	0.195675	0.184562	0.117856	0.140797	0.0814766	0.0842039	0.0844977	0.0778232	0.0825717	0.0833272	0.0882228	0.0901589	-2.53616
ENSG00000224870	MRPL20-AS1	lncRNA	human	202.718	281.801	216.574	226.905	270.958	220.723	176.964	297.365	185.862	224.61	237.795	170.751	240.735	232.479	194.259	-0.45709	0.130673	-0.0400518	-0.303455	0.107266	-0.0491195	0.170499	-0.0223383	-0.00951233	0.623119	-0.168981	0.43396	0.442358	-0.154185	0.265247	0.141384	0.123639	0.143766	0.145742	0.129682	0.145466	0.155263	0.122197	0.157915	0.132018	0.136146	0.154465	0.143968	0.144166	0.161459	-3.23297
ENSG00000242485	MRPL20	protein_coding	human	706.311	766.703	583.211	759.934	750.396	613.115	714.568	764.115	469.97	718.749	591.246	547.561	756.658	607.925	617.731	0.0719256	-0.091082	-0.303339	0.0921594	-0.0597161	-0.214219	0.0369032	0.032323	0.088783	-0.127388	-0.210988	-0.358656	-0.120916	-0.15243	-0.295834	0.0828254	0.0835644	0.0902301	0.083375	0.0884494	0.0974351	0.0787625	0.0843786	0.100868	0.0795219	0.0872161	0.0869583	0.0850253	0.0986864	0.0949201	0.8684
ENSG00000264293	RN7SL657P	misc_RNA	human	0	0	0	0	0	0	0	0	0	0	0	0	0	0	0	NA	NA	NA	NA	NA	NA	NA	NA	NA	NA	NA	NA	NA	NA	NA	NA	NA	NA	NA	NA	NA	NA	NA	NA	NA	NA	NA	NA	NA	NA	NA
ENSG00000272455	AL391244.2	lncRNA	human	48.8967	60.5328	48.8461	58.2982	63.6644	50.7373	52.4129	70.1117	45.0764	54.19	53.908	43.6887	67.1397	58.4433	53.6019	-0.0680807	0.161211	0.120065	0.248141	0.367952	0.161058	0.335094	0.205372	0.0401178	0.266263	-0.0403768	0.205289	0.149096	-0.204825	-0.0775078	0.303459	0.292503	0.305782	0.279847	0.273293	0.308399	0.267107	0.255549	0.297034	0.278695	0.285236	0.295447	0.243692	0.269684	0.275386	-0.224349
ENSG00000235098	ANKRD65	protein_coding	human	0.169606	0.378615	0.158492	0.180913	0.187804	0.161958	0	0.187903	0	0.170474	0.15774	0	0	0	0	-0.703018	0.354947	-0.50416	-0.89183	-1.00226	-0.569223	NA	-1.33638	NA	1.07291	-0.83787	NA	NA	NA	NA	4.08047	3.25207	4.08047	4.08047	4.08047	4.08047	NA	4.05592	NA	4.05584	4.05589	NA	NA	NA	NA	-0.172288
ENSG00000225905	AL391244.1	lncRNA	human	0.1497	0.172413	0.341469	0.344843	0.166899	0.142694	0.170448	0	0.175704	0	0.211936	0.185832	0.185776	0	0.160598	-0.703018	-1.09864	0.457628	0.0699547	-1.00226	-0.569223	0.789963	NA	-1.02734	NA	1.55757	1.17731	-1.04106	NA	-0.628535	4.08047	4.08047	3.36125	3.36614	4.08047	4.08047	4.08047	NA	4.08047	NA	4.08047	4.08047	4.08047	NA	4.08047	-0.172288
ENSG00000205116	TMEM88B	protein_coding	human	0	0	0	0	0	0	0	0	0	0	0	0	0	0	0	NA	NA	NA	NA	NA	NA	NA	NA	NA	NA	NA	NA	NA	NA	NA	NA	NA	NA	NA	NA	NA	NA	NA	NA	NA	NA	NA	NA	NA	NA	NA
ENSG00000225285	LINC01770	lncRNA	human	1.76837	2.63176	2.68781	2.75851	1.95694	2.90299	1.13965	1.00368	2.21724	0.91541	1.93422	1.24207	1.23809	1.55323	2.25821	-3.04697	-1.16369	-0.354802	-0.735375	-3.34739	-0.193119	2.34358	-2.15817	0.164777	1.89396	0.822555	2.71905	-2.59488	3.17099	0.556449	1.74021	1.26464	1.21644	1.19269	1.69936	1.17683	1.93463	2.12523	1.31199	2.14647	1.4361	1.92702	1.91355	1.82489	1.30593	-1.75092
ENSG00000179403	VWA1	protein_coding	human	408.917	430.398	410.092	428.146	410.618	420.046	362.133	355.028	356.941	359.985	366.049	348.141	357.66	356.957	372.333	-0.223836	-0.516479	-0.0138185	-0.283744	-0.560027	-0.0073215	-0.0424983	-0.0418613	0.00612276	-0.25721	0.502466	0.226547	-0.244701	0.554344	0.286634	0.112433	0.113599	0.128243	0.107508	0.116957	0.117465	0.104552	0.115031	0.131263	0.1099	0.127253	0.126985	0.110248	0.118879	0.110536	-1.99085
ENSG00000215915	ATAD3C	protein_coding	human	0.171761	0.1846	0.381718	0	0.162733	0	0.168454	0.357522	0.332523	0.348581	0.558337	0.497054	0.159618	0.14088	0	1.22054	1.29666	2.29296	NA	0.921293	NA	-1.13359	-0.394048	-1.89856	0.131881	0.950536	1.09185	0.88249	-0.526457	NA	4.08047	4.05588	3.1826	NA	4.08047	NA	4.08047	3.26893	3.3027	3.23305	2.60933	2.70893	4.08047	4.08047	NA	0.299116
ENSG00000160072	ATAD3B	protein_coding	human	50.6853	61.6204	43.1889	60.3436	56.9869	42.2851	66.1417	76.1495	41.3531	67.8138	58.9554	48.7877	73.7332	54.0178	56.7361	0.626251	0.75714	0.396297	0.881895	0.651538	0.291	0.273416	-0.104101	-0.105568	0.167892	-0.361296	-0.213302	-0.199067	-0.35997	-0.579541	0.2889	0.261092	0.300937	0.273603	0.275241	0.324674	0.257967	0.23561	0.315572	0.243554	0.257001	0.284178	0.248785	0.293422	0.293101	2.16771
ENSG00000284740	AL645728.2	transcribed_unprocessed_pseudogene	human	1.75243	2.19732	2.11943	2.35365	1.88078	1.57072	1.46634	1.33794	1.17824	1.26523	1.68454	1.33202	1.55177	0.845744	1.28404	-1.20488	-0.774581	-0.239282	-0.342474	-1.4451	-1.60137	0.884512	-0.639593	-1.3614	0.441457	0.543608	0.979998	-1.06845	-0.16534	-1.25339	1.578	1.29255	1.298	1.24635	1.47601	1.72411	1.67733	1.67772	1.87569	1.76339	1.43712	1.74381	1.5913	2.25606	1.85282	-0.763551
ENSG00000197785	ATAD3A	protein_coding	human	877.122	1024.93	759.743	1008.95	984.5	759.351	1072.59	1227	717.129	1093.63	958.859	821.645	1195.23	922.315	940.625	0.496625	0.539188	0.300237	0.675131	0.521313	0.239913	0.195056	-0.0166219	-0.0608931	0.0782935	-0.237657	-0.179607	-0.122439	-0.278942	-0.424514	0.0798875	0.0796563	0.0856559	0.0780818	0.0754315	0.0980209	0.0754065	0.0713205	0.102524	0.0768309	0.083137	0.083768	0.0713933	0.0916355	0.0955961	6.21656
ENSG00000205090	TMEM240	protein_coding	human	8.75519	19.8702	13.1165	13.4068	19.6764	11.776	7.47103	24.8836	10.2998	13.0702	17.2863	7.77409	18.0049	15.7855	10.3739	-1.81974	0.643319	0.0505071	-0.271615	0.650775	-0.311514	1.56435	-0.00426803	-0.362384	2.48394	-0.593467	1.89056	0.953488	-0.954242	-0.0278442	0.772575	0.488579	0.566195	0.550606	0.463594	0.6287	0.770636	0.41201	0.632924	0.667511	0.500728	0.780813	0.460926	0.52995	0.627727	-2.35542
ENSG00000160075	SSU72	protein_coding	human	2515.62	2687.84	2136.63	2640.38	2596.41	2130.4	2750.48	2914.35	1902.23	2805.2	2398.16	2237.22	2847.67	2307.95	2343.75	0.385936	0.195324	0.130338	0.342534	0.191499	0.0604091	-0.0263239	-0.0018541	-0.070822	-0.155606	-0.0630829	-0.238911	-0.119874	-0.12918	-0.272013	0.0618914	0.0689239	0.0648467	0.0598173	0.0671928	0.0776089	0.0458948	0.0567962	0.0685091	0.0554074	0.058167	0.0513678	0.0500787	0.0684373	0.0641616	6.2357
ENSG00000215014	AL645728.1	lncRNA	human	17.7716	19.4914	15.5549	16.4875	18.6314	15.5284	15.1904	18.7379	12.4017	17.8874	15.625	14.2784	15.7501	14.8362	13.0366	0.00414691	-0.113636	-0.186362	-0.400103	-0.143571	-0.258887	-0.390021	-0.029197	-0.0733116	-0.0816768	-0.0706259	-0.173834	0.285589	-0.110129	0.155494	0.493705	0.439736	0.499312	0.506371	0.458289	0.502533	0.54735	0.452239	0.550558	0.478784	0.491152	0.545367	0.520197	0.51499	0.567225	0.00839958
ENSG00000274481	AL691432.3	processed_pseudogene	human	0	0	0	0	0	0	0	0	0	0	0	0	0	0	0	NA	NA	NA	NA	NA	NA	NA	NA	NA	NA	NA	NA	NA	NA	NA	NA	NA	NA	NA	NA	NA	NA	NA	NA	NA	NA	NA	NA	NA	NA	NA
ENSG00000228594	FNDC10	protein_coding	human	146.161	167.892	144.743	150.646	162.959	158.984	125.484	156.136	132.031	139.788	139.147	121.21	139.482	148.911	137.95	-0.258091	-0.245743	-0.0813654	-0.374305	-0.247095	0.126686	-0.0992359	0.000141407	0.207131	0.048378	0.16717	0.193315	0.158533	0.375275	0.510381	0.16571	0.161238	0.18035	0.167834	0.162053	0.17574	0.172925	0.163493	0.194305	0.164921	0.1814	0.186684	0.171222	0.177423	0.183825	-1.55749
ENSG00000286989	AL691432.4	lncRNA	human	4.33392	7.72929	5.3681	5.30751	6.27129	5.19999	3.10379	7.29024	4.1083	5.20401	6.21304	3.36706	4.86489	4.78934	3.97303	-1.27227	0.241543	-0.187249	-0.682871	-0.260518	-0.367265	0.606161	-0.501012	-0.177895	1.54919	-0.425176	1.09913	0.453514	-0.104123	0.327486	0.978957	0.718022	0.850068	0.861821	0.794416	0.875874	1.06278	0.724774	0.9259	0.886514	0.774455	1.04117	0.871937	0.881864	0.955264	-1.29962
ENSG00000272106	AL691432.2	lncRNA	human	44.3384	49.2431	37.6705	45.2668	51.079	40.5571	40.225	50.4769	30.2189	43.6017	36.8097	33.2767	46.3697	41.3961	36.4331	-0.0832697	-0.171496	-0.381295	-0.220736	0.0217459	-0.208728	-0.120126	0.19451	0.171457	-0.0525614	-0.206833	-0.281096	0.273867	-0.228474	0.0217433	0.302681	0.287714	0.327003	0.304827	0.287242	0.323532	0.30739	0.279623	0.351262	0.289457	0.318166	0.332834	0.296738	0.314292	0.333226	-0.275108
ENSG00000197530	MIB2	protein_coding	human	461.097	555.7	484.195	507.476	570.834	470.145	354.753	494.673	354.879	389.37	419.31	345.876	450.094	417.455	365.211	-0.723408	-0.535077	-0.319926	-0.610799	-0.344644	-0.491346	0.129366	0.193289	-0.171786	0.226088	0.217288	0.419824	0.297199	-0.144365	0.130553	0.117059	0.121374	0.130867	0.114166	0.130265	0.12539	0.105063	0.128579	0.131916	0.113057	0.128398	0.124528	0.121843	0.132326	0.113092	-6.17987
ENSG00000189409	MMP23B	protein_coding	human	0.825366	1.19442	0.58517	1.16081	1.9762	1.72798	0.647479	1.83329	0.967451	0.64763	0.40734	0.169237	1.75803	2.26369	1.5354	-1.66979	-0.457577	-2.43632	-0.403548	0.916475	0.939163	1.2714	1.33664	3.36743	1.20219	-1.89966	-0.746246	1.33916	0.0309859	1.35309	2.17764	1.7585	2.50655	1.79217	1.36416	1.54294	2.44046	1.45827	2.22079	2.41716	3.02759	4.08047	1.50223	1.30721	1.69926	-0.766788
ENSG00000248333	CDK11B	protein_coding	human	453.273	488.837	409.149	499.662	454.377	426.528	450.804	436.069	344.521	438.069	394.445	367.013	449.949	381.333	421.186	-0.0521228	-0.237813	-0.158444	0.0417122	-0.370724	-0.0993927	0.110978	-0.131579	0.0580659	-0.14997	0.0808355	-0.0895475	-0.381158	0.273638	-0.130957	0.100868	0.0977935	0.103229	0.0927469	0.100505	0.112886	0.0961226	0.101127	0.118595	0.100903	0.104588	0.107907	0.0967856	0.116192	0.10917	-0.516744
ENSG00000272004	FO704657.1	lncRNA	human	5.63111	5.40116	3.30088	5.02852	5.27702	4.08906	6.46412	6.66796	3.32231	6.91013	4.40851	4.62261	6.19905	5.119	4.88454	1.03317	0.561579	-0.156201	0.625056	0.651355	0.412057	-0.391113	0.104354	0.566823	-0.453192	-0.71653	-1.16769	0.0578154	-0.226043	-0.192714	0.830781	0.872529	1.06009	0.868836	0.850939	1.00645	0.732626	0.761571	1.07072	0.735052	0.946075	0.904115	0.75681	0.880497	0.899593	1.24361
ENSG00000189339	SLC35E2B	protein_coding	human	778.888	936.069	795.185	834.997	906.527	835.41	625.873	827.865	654.062	705.708	729.317	604.492	732.901	743.123	682.713	-0.53576	-0.378826	-0.245927	-0.523678	-0.378288	-0.162685	0.0288039	0.00181666	0.0824922	0.19259	0.134303	0.306533	0.176617	0.217997	0.371446	0.080791	0.0777711	0.0818063	0.0839603	0.0783278	0.0929652	0.0881187	0.0785504	0.0973997	0.0817237	0.0828278	0.0864816	0.0855555	0.093684	0.0999623	-6.63144
ENSG00000269737	AL691432.1	transcribed_processed_pseudogene	human	0.339211	0.388031	0.316984	1.01286	0.538341	0.489029	0.601763	0.169619	0.141278	0	0	0	0.814097	0.308246	0.727185	-1.73689	-2.12574	-1.53815	0.929746	-1.05359	-0.627653	2.63784	1.0595	0.896211	NA	NA	NA	-1.93	0.43533	-1.51569	3.60213	3.45813	3.70293	2.10509	2.83983	3.00335	2.5827	4.08047	4.08047	NA	NA	NA	2.2701	3.4801	2.38902	-0.482184
ENSG00000215914	MMP23A	unprocessed_pseudogene	human	0	0	0	0	0	0	0	0	0	0	0	0	0	0	0	NA	NA	NA	NA	NA	NA	NA	NA	NA	NA	NA	NA	NA	NA	NA	NA	NA	NA	NA	NA	NA	NA	NA	NA	NA	NA	NA	NA	NA	NA	NA
ENSG00000008128	CDK11A	protein_coding	human	18.2853	24.6169	16.7237	21.0544	24.4965	16.908	16.6935	26.3105	11.9077	19.7241	18.0106	12.9899	22.5827	18.1739	15.2841	-0.425545	0.0737689	-0.510982	-0.191112	0.133612	-0.547444	0.251858	0.0615512	-0.0361483	0.534054	-0.580034	-0.0663387	0.356994	-0.680324	-0.345953	0.451804	0.392591	0.515125	0.436866	0.405131	0.486562	0.47612	0.391313	0.595824	0.428968	0.496618	0.562983	0.434189	0.481491	0.518522	-0.94188
ENSG00000268575	AL031282.2	lncRNA	human	88.0474	104.855	89.7606	99.1806	108.546	92.6508	75.2525	99.0808	72.3416	78.9499	81.5553	68.2701	93.7287	87.5333	79.6466	-0.5308	-0.378294	-0.248168	-0.350531	-0.19118	-0.214524	0.19711	0.186505	0.0334163	0.185911	0.133605	0.299554	0.189914	-0.020284	0.146816	0.215845	0.215525	0.211685	0.205243	0.191747	0.215747	0.224457	0.21194	0.228769	0.233395	0.231309	0.232133	0.201743	0.210795	0.22569	-2.45917
ENSG00000227775	AL031282.1	transcribed_processed_pseudogene	human	2.51482	2.2569	1.66834	1.54997	2.5728	3.81974	1.66167	2.34594	2.86175	2.31569	1.45252	1.73356	1.63122	3.9115	2.962	0.277738	-0.38383	-0.853228	-1.86076	0.0212735	1.28153	-2.1285	0.39314	2.16091	-0.620188	-0.453879	-1.11812	1.92513	1.2686	3.17159	1.32967	1.39584	1.6318	1.76296	1.23713	1.07665	1.69576	1.27618	1.29414	1.33887	1.6871	1.58804	1.63281	1.00158	1.42587	0.208878
ENSG00000215790	SLC35E2A	protein_coding	human	255.074	315.209	255.219	265.969	305.511	261.068	191.653	281.395	193.652	232.226	234.356	187.563	233.945	231.859	198.781	-0.612747	-0.341145	-0.379175	-0.700456	-0.354712	-0.376307	-0.070949	-0.012363	0.0023594	0.306293	-0.0344604	0.250156	0.376871	-0.0191794	0.335051	0.13008	0.13403	0.134922	0.126788	0.120426	0.135481	0.138784	0.135563	0.151021	0.143572	0.149518	0.146892	0.129342	0.136673	0.144462	-4.71055
ENSG00000008130	NADK	protein_coding	human	1013.32	1182.82	913.581	1112.51	1140.88	949.523	1021.31	1218.9	780.541	1081.55	975.26	834.968	1144.28	974.852	950.5	0.00124447	0.047709	-0.10884	0.079237	0.0374017	-0.0588111	0.0946154	-0.00886533	0.0487667	0.0820679	-0.155156	-0.093297	-0.0104677	-0.0944308	-0.128186	0.0704986	0.0744925	0.0832325	0.07347	0.071259	0.0905356	0.0706573	0.0714988	0.099827	0.0716114	0.0847253	0.0819205	0.0718846	0.0882681	0.0907714	0.0176524
ENSG00000078369	GNB1	protein_coding	human	8814.02	9710.11	7527.69	9117.55	9433.4	7838.67	9322.09	10635.2	6861.25	9895.02	8505.15	7710.34	9963.85	8570.02	8279.72	0.321379	0.211588	0.0757392	0.238497	0.221737	0.127303	-0.0656604	0.0115914	0.0507051	-0.0739681	-0.134486	-0.228887	0.0144822	-0.0924494	-0.100976	0.0522118	0.0566088	0.0535941	0.0486475	0.0567674	0.0691088	0.034888	0.0442408	0.0612432	0.0443899	0.045769	0.042234	0.0390924	0.0614202	0.0566535	6.1553
ENSG00000231050	AL109917.1	lncRNA	human	10.1227	16.5418	11.4892	10.7818	14.4983	12.9721	5.16427	14.6002	8.89325	10.1114	11.5189	6.38554	8.91722	11.2926	8.1181	-1.48142	-0.0833091	-0.64526	-1.53925	-0.428518	-0.296627	-0.0269907	-0.343286	0.347664	1.4255	-0.555765	0.857819	1.14118	0.133985	1.25007	0.660043	0.481103	0.573665	0.636659	0.499873	0.54141	0.869827	0.504622	0.633348	0.65548	0.576222	0.777618	0.670266	0.564486	0.711487	-2.24442
ENSG00000169885	CALML6	protein_coding	human	2.43634	3.55611	2.56513	3.30229	2.85081	2.43305	2.44294	3.0628	1.8349	2.63135	2.75025	1.83311	2.83241	2.00669	2.41811	-0.733887	-0.0234876	-0.297139	0.0591286	-0.544644	-0.585799	0.80886	-0.531519	-0.281952	0.760401	-0.291853	0.450196	-0.571256	-0.0370982	-0.632574	1.22676	1.06858	1.23124	1.06507	1.13695	1.24547	1.23678	1.16569	1.44143	1.23228	1.25385	1.43384	1.16491	1.35452	1.27161	-0.59823
ENSG00000178821	TMEM52	protein_coding	human	12.3104	15.08	8.03343	12.5716	12.3426	11.0727	13.979	16.8535	8.45723	16.4143	11.682	9.454	14.1657	12.4794	12.608	0.603416	0.752836	-0.398443	0.491271	0.343238	0.441572	-0.0962667	-0.406999	0.83976	0.183527	-1.14551	-0.982191	-0.11592	0.0993053	-0.0390539	0.551966	0.511205	0.712019	0.550062	0.553245	0.601387	0.49926	0.469446	0.696314	0.462555	0.604868	0.649152	0.506036	0.554127	0.552478	1.09321
ENSG00000142609	CFAP74	protein_coding	human	2.15102	2.21317	2.6465	3.19863	1.87315	4.15096	2.28512	0.93436	3.5556	1.32315	1.90513	1.85005	2.00534	3.11358	4.21268	-0.926187	-1.43019	0.0415004	0.189352	-2.27205	1.08522	1.12729	-0.85578	1.03507	-0.470026	1.46994	0.977295	-2.42957	3.34592	0.903377	1.39575	1.36538	1.25695	1.17797	1.60812	0.997443	1.40957	1.9693	1.0738	1.64987	1.47081	1.51436	1.63971	1.40148	1.01766	-0.663574
ENSG00000233542	AL391845.2	lncRNA	human	0	0.306828	0.180185	0	0	0	0	0.311565	0.15682	0.283414	0.450703	0.165187	0	0	0	NA	1.63576	1.41939	NA	NA	NA	NA	-1.6747	-1.02734	1.41273	-0.212306	1.17731	NA	NA	NA	NA	3.4845	4.08047	NA	NA	NA	NA	3.41038	4.08047	3.45874	2.82336	4.08047	NA	NA	NA	NA
ENSG00000187730	GABRD	protein_coding	human	6.7178	6.9387	7.31519	6.78328	6.19462	6.15503	6.93636	6.58131	6.76448	7.10132	7.73499	7.32066	6.44269	5.84782	6.34573	0.299523	0.00488879	0.681296	0.160102	-0.236564	0.217037	-0.117274	-0.240514	-0.462602	-0.254737	0.679261	0.402097	-0.365152	0.452285	0.0692086	0.816065	0.762924	0.745608	0.767908	0.822837	0.829647	0.754566	0.767187	0.747405	0.746049	0.688818	0.743274	0.771752	0.830251	0.777494	0.367034
ENSG00000226969	AL391845.1	lncRNA	human	0.491066	0.857856	1.04186	0.494462	0.50262	0.501526	0.310365	0.655359	0.814908	0.631996	1.19871	0.827849	0.300111	0.327996	0.324447	-0.691161	0.524588	1.37113	-0.879147	-0.989415	-0.555352	-0.171807	-1.48844	-1.90977	1.22529	0.829308	2.05901	-0.0792802	0.43533	0.333251	2.75802	2.13453	2.00762	2.76694	2.72562	2.78815	3.3946	2.45012	2.28717	2.43537	1.82267	2.26583	3.48015	3.40351	3.45887	-0.250601
ENSG00000067606	PRKCZ	protein_coding	human	365.555	404.375	364.66	377.021	395.884	372.192	320.473	369.993	316.243	342.151	343.963	311.198	344.609	342.805	326.524	-0.206122	-0.324844	-0.0144943	-0.316532	-0.290885	-0.0181578	-0.0936022	0.0345813	-0.00474734	-0.0826918	0.311099	0.208199	0.0568629	0.274154	0.308257	0.117148	0.114807	0.11876	0.114954	0.117272	0.127293	0.110008	0.108729	0.123495	0.108919	0.11141	0.115043	0.110694	0.121908	0.12087	-1.7595
ENSG00000271806	AL590822.2	lncRNA	human	0.173599	0	0.405745	0.185172	0.162733	0.211506	0.339322	0.169619	0.536463	0.180183	0.425899	0.520277	0.345393	0.355911	0.368205	1.22054	NA	2.36455	1.03172	0.921293	1.35433	-0.171807	1.0595	-1.00942	-1.32153	2.50236	1.1549	-0.0792795	0.435331	0.333252	4.08047	NA	3.36636	4.08047	4.08047	4.08047	3.28954	4.08047	2.82835	4.08047	3.27744	2.84108	3.31051	3.30674	3.30703	0.299116
ENSG00000182873	PRKCZ-AS1	lncRNA	human	25.8992	28.5845	22.2407	29.856	33.404	25.0582	29.2385	36.1111	21.1575	28.0679	24.1717	21.9009	36.8714	31.2069	28.0158	0.207577	0.0884819	-0.0297167	0.402765	0.587638	0.224998	0.211655	0.502814	0.254862	-0.0842862	-0.117532	-0.220745	0.216715	-0.362128	-0.169329	0.380948	0.367046	0.412286	0.357021	0.339648	0.409543	0.350151	0.32384	0.430724	0.357877	0.392776	0.406649	0.316373	0.364246	0.381943	0.544894
ENSG00000162585	FAAP20	protein_coding	human	530.692	639.475	513.594	570.438	610.524	522.152	486.553	628.318	429.851	545.289	527.63	437.235	558.896	510.526	476.334	-0.204346	-0.058069	-0.10264	-0.183654	-0.102342	-0.117493	0.0374522	-0.0427599	-0.015914	0.181904	-0.0431525	0.11846	0.113023	-0.0137025	0.0766703	0.0909707	0.0882159	0.0973368	0.0934438	0.101536	0.102888	0.0943113	0.0996029	0.110709	0.0890478	0.0963096	0.099617	0.1049	0.114566	0.107446	-2.24628
ENSG00000234396	AL590822.1	lncRNA	human	1.27084	1.52358	0.84167	1.70133	1.68892	1.90403	1.04345	1.22401	0.891642	0.838361	0.419783	0.315272	1.42327	1.65963	1.66366	-1.29953	-0.97076	-2.97191	-0.422686	-0.569909	0.227156	0.899542	0.425307	3.22635	0.329117	-1.93224	-1.66861	-0.114022	0.80485	0.671214	1.77485	1.59177	2.19984	1.61964	1.50629	1.49069	2.09488	1.79883	2.32706	2.09149	2.99558	3.34674	1.82119	1.64569	1.78464	-0.732195
ENSG00000157933	SKI	protein_coding	human	2235.14	2988.93	2320.67	2382.73	2867.37	2318.45	2174.96	3428.83	2169.6	2724.23	2784.1	2111.82	2784.97	2671	2242.41	-0.0145949	0.397324	0.273554	-0.0193096	0.374519	0.212051	0.0120982	-0.021653	-0.0622692	0.447627	-0.122466	0.304727	0.424982	-0.160442	0.241595	0.0602959	0.0607956	0.0588899	0.0580098	0.064795	0.0734563	0.0522949	0.0571359	0.068391	0.0552211	0.0539802	0.0542829	0.0568207	0.0719918	0.0675691	-0.242054
ENSG00000287356	AL590822.3	lncRNA	human	5.36748	8.33775	7.63044	6.6084	6.47112	6.90841	5.09341	7.85332	7.35734	6.60483	8.8895	6.13664	6.12711	6.47502	6.56198	-0.542916	0.400932	0.649168	-0.076581	-0.264747	0.337203	0.48653	-0.664886	-0.31404	0.968653	0.246624	1.2078	-0.159096	0.604931	0.424045	0.909359	0.681287	0.6893	0.770999	0.741531	0.74418	0.949885	0.698039	0.703507	0.837776	0.64875	0.851765	0.789922	0.758176	0.790046	-0.597031
ENSG00000116151	MORN1	protein_coding	human	300.788	349.945	252.462	349.815	333.721	272.806	324.115	359.023	210.071	323.128	271.752	233.151	357.736	278.849	293.111	0.0312769	0.0658522	-0.296785	0.26214	0.0238271	-0.128819	0.247545	-0.0405389	0.168259	0.0699352	-0.36129	-0.31132	-0.206939	-0.150544	-0.38032	0.119505	0.113873	0.130312	0.12153	0.119653	0.13464	0.119983	0.114291	0.144363	0.112887	0.124243	0.130476	0.122072	0.134986	0.137073	0.261721
ENSG00000272161	AL589739.1	lncRNA	human	1.9068	1.1858	1.03465	0.899077	2.19027	1.25935	1.32277	1.8815	0.832985	1.61108	0.729067	1.3802	1.55031	1.83061	0.706115	0.77257	-1.0136	-0.792838	-2.05521	0.833852	-0.222895	-2.82502	1.83938	0.568578	-1.74256	0.23188	-1.55575	2.9408	-1.07936	1.84578	1.51943	1.88024	2.00459	2.24784	1.38472	1.96097	1.9409	1.52596	2.26797	1.63466	2.23739	1.78968	1.80767	1.59275	2.61767	0.50846
ENSG00000269896	AL513477.1	transcribed_processed_pseudogene	human	40.6101	32.7874	26.3095	42.559	35.9121	31.5093	48.6182	35.0965	24.651	40.0483	25.3429	32.3106	44.7283	33.3477	39.0072	0.711063	-0.214236	-0.271959	0.669948	0.124364	0.180827	-0.0243753	0.341161	0.453036	-0.886712	-0.0538333	-0.964745	-0.51471	0.0585711	-0.478406	0.319202	0.353541	0.398599	0.316507	0.350853	0.359336	0.284476	0.351395	0.397282	0.312088	0.397339	0.358439	0.315735	0.356546	0.322956	2.22763
ENSG00000272420	AL513477.2	lncRNA	human	7.69241	11.2376	6.06736	10.3926	10.3641	7.77163	8.71106	12.3393	4.94505	9.4046	7.5775	4.80461	11.3945	8.62369	8.65889	-0.313796	0.364825	-0.923922	0.353766	0.256452	-0.158742	0.684451	-0.106588	0.770593	0.714202	-1.2872	-0.594082	-0.0670461	-0.41136	-0.502546	0.688413	0.597482	0.82701	0.610475	0.594637	0.701135	0.658537	0.565957	0.89639	0.643378	0.780715	0.894711	0.579081	0.663899	0.680519	-0.455826
ENSG00000157916	RER1	protein_coding	human	2012.86	2230.39	1732.82	2180.9	2151.01	1741.1	2122.18	2321.87	1455.73	2166.81	1869.64	1687.94	2263.1	1807.94	1835.94	0.177136	0.0772044	-0.0581601	0.216458	0.0677085	-0.109476	0.0561011	-0.00806985	-0.0516949	-0.0644392	-0.134008	-0.218743	-0.11772	-0.174999	-0.315221	0.0571975	0.0623301	0.0610301	0.0543977	0.060793	0.0740219	0.0497472	0.0582714	0.0752173	0.0573882	0.0611085	0.0569018	0.0528631	0.0724094	0.0692557	3.09692
ENSG00000157911	PEX10	protein_coding	human	644.38	759.836	564.935	711.72	716.082	577.14	705.077	834.479	502.749	750.313	661.667	561.302	779.752	635.709	631.257	0.239215	0.308803	0.0599593	0.327043	0.237952	0.059062	0.104506	-0.0700718	-0.00154321	0.105103	-0.247581	-0.16271	-0.0581597	-0.176274	-0.257332	0.0895739	0.0820774	0.0912861	0.0813743	0.0899629	0.0984642	0.0819955	0.0819494	0.10171	0.0835173	0.0852025	0.09306	0.0824752	0.0990022	0.092519	2.67058
ENSG00000149527	PLCH2	protein_coding	human	13.9191	19.5191	15.74	17.3742	17.2203	17.6628	16.33	22.1382	17.7494	18.281	19.903	14.7122	19.7485	19.7859	19.7319	0.0942476	0.602794	0.586316	0.507506	0.382593	0.790918	0.427659	-0.216511	0.202385	0.539022	-0.0114518	0.507201	-0.0958918	0.410268	0.292269	0.531675	0.456348	0.513617	0.487796	0.476418	0.489861	0.480608	0.406753	0.47091	0.448378	0.440926	0.510192	0.436237	0.438734	0.451269	0.177266
ENSG00000224387	AL139246.1	lncRNA	human	0.716719	0.399683	0	0.528449	0.147916	0.196875	1.18738	0.562558	0.166821	1.11387	0.34146	0.609077	0.677819	0.327996	0.649806	3.10316	2.01226	NA	2.55614	0.921293	1.35433	-0.545424	-1.06231	0.896211	-1.1637	-1.55765	-2.62868	-1.60194	0.43533	-1.18852	2.34965	3.42718	NA	2.81452	4.08047	4.08047	1.74243	2.80745	4.08047	1.9168	3.57323	2.43281	2.43469	3.40351	2.51072	1.32069
ENSG00000229393	AL139246.4	lncRNA	human	1.01402	0.955982	1.15162	1.02717	0.822467	0.733318	1.64428	1.48453	1.38476	1.62144	1.7321	1.6658	1.51748	1.16713	1.32569	2.42491	2.10384	2.71818	2.31044	1.85588	1.91327	-0.112883	-0.268555	-0.820306	-0.277335	0.590717	0.297167	-0.421786	0.0510609	-0.401023	2.1371	2.08365	2.07238	2.03625	2.16979	2.60598	1.48996	1.52822	1.83331	1.49367	1.49108	1.56494	1.51431	1.8727	1.78838	1.13468
ENSG00000157881	PANK4	protein_coding	human	438.859	503.313	411.995	497.939	490.258	408.273	458.434	516.108	350.971	461.399	433.041	377.653	509.252	417.102	424.12	0.00772262	0.00464459	0.0169094	0.178097	0.0211834	-0.0729721	0.187106	0.0177455	-0.0904693	0.0326138	0.0133366	0.0254857	-0.125556	-0.0924931	-0.240115	0.102209	0.105157	0.111108	0.101223	0.099856	0.125134	0.0970777	0.0973591	0.131291	0.100103	0.109992	0.107878	0.0948713	0.118894	0.122243	0.0755568
ENSG00000197921	HES5	protein_coding	human	0	0	0	0	0.147916	0	0	0.155891	0	0	0	0	0.145929	0.128999	0	NA	NA	NA	NA	0.921293	NA	NA	1.0595	NA	NA	NA	NA	0.88249	-0.526457	NA	NA	NA	NA	NA	4.08047	NA	NA	4.08047	NA	NA	NA	NA	4.08047	4.08047	NA	NA
ENSG00000272449	AL139246.5	lncRNA	human	8.47841	12.661	9.82313	10.0288	12.2083	8.57068	7.20649	13.4279	7.29341	9.46618	10.8012	7.24213	10.7085	9.12835	7.28219	-0.713697	0.124026	-0.0251338	-0.364451	0.105409	-0.544144	0.368663	-0.0181327	-0.521845	0.875713	-0.150468	0.707586	0.503104	-0.653496	-0.170457	0.701405	0.57329	0.640552	0.633126	0.575227	0.71374	0.704392	0.525185	0.718069	0.635373	0.585474	0.712731	0.582499	0.658957	0.724395	-1.01752
ENSG00000238164	TNFRSF14-AS1	lncRNA	human	0	0.0922998	0	0.153878	0	0.211506	0.141911	0.0939515	0.181205	0.085237	0.0788701	0	0.154182	0.21503	0.341221	NA	0.766694	NA	1.03172	NA	1.35433	0.789963	-0.806158	0.896211	0.54332	-0.30784	NA	-1.04106	1.3971	0.333251	NA	4.0717	NA	4.08047	NA	4.08047	4.08047	4.07175	4.08047	4.07162	4.07171	NA	4.08047	4.08047	3.39708	NA
ENSG00000157873	TNFRSF14	protein_coding	human	0.625767	1.70109	2.70199	1.03822	1.02017	2.91553	0.340895	1.33932	3.82989	0.910233	3.0601	1.94303	0.690787	2.63214	2.5891	-2.63504	0.496385	1.88666	-0.892231	-1.07471	2.00269	1.7874	-1.56395	0.121796	3.14587	1.38034	4.51825	-0.175893	3.06897	2.91663	2.45166	1.46143	1.26873	1.99898	1.99597	1.27318	3.50611	1.79953	1.0371	2.09486	1.13763	1.72496	2.57949	1.53183	1.54191	-1.0748
ENSG00000225931	AL139246.2	TEC	human	0	0	0	0.153878	0	0.211506	0.141911	0	0.181205	0	0	0	0.154182	0.21503	0.341221	NA	NA	NA	1.03172	NA	1.35433	0.789963	NA	0.896211	NA	NA	NA	-1.04106	1.3971	0.333251	NA	NA	NA	4.08047	NA	4.08047	4.08047	NA	4.08047	NA	NA	NA	4.08047	4.08047	3.39708	NA
ENSG00000228037	AL139246.3	lncRNA	human	0	0	0	0	0	0	0	0	0	0	0	0	0	0	0	NA	NA	NA	NA	NA	NA	NA	NA	NA	NA	NA	NA	NA	NA	NA	NA	NA	NA	NA	NA	NA	NA	NA	NA	NA	NA	NA	NA	NA	NA	NA
ENSG00000157870	PRXL2B	protein_coding	human	645.138	675.498	478.736	694.771	654.31	510.885	758.94	765.978	428.473	746.727	568.181	542.826	778.147	583.013	617.377	0.561341	0.327744	-0.0530363	0.583508	0.33269	0.0708397	0.039544	0.00655391	0.123201	-0.197972	-0.379739	-0.597626	-0.219678	-0.259751	-0.502085	0.0935631	0.0940307	0.103297	0.0852929	0.0928298	0.104595	0.0805023	0.0878502	0.111327	0.0895233	0.099583	0.0992963	0.0811448	0.10004	0.0943355	5.9996
ENSG00000142606	MMEL1	protein_coding	human	0.838582	0.386941	0.320122	0.498721	0.329632	0.307807	0.986596	0.387233	0.298098	0.912682	0.371833	0.751062	0.499576	0.308246	0.455795	2.09937	-0.0369057	0.457627	0.962567	-0.0404756	0.392563	-1.13114	-0.00018122	-0.0655592	-2.14049	0.496291	-1.6252	-0.96998	0.43533	-0.558829	2.28893	3.24566	3.43938	2.76084	3.38101	3.55546	2.00367	3.19717	3.48432	2.18014	3.23612	2.32992	2.72116	3.4801	2.85301	0.917183
ENSG00000237058	MMEL1-AS1	lncRNA	human	0	0	0	0	0	0	0	0	0	0	0	0	0	0	0	NA	NA	NA	NA	NA	NA	NA	NA	NA	NA	NA	NA	NA	NA	NA	NA	NA	NA	NA	NA	NA	NA	NA	NA	NA	NA	NA	NA	NA	NA	NA
ENSG00000215912	TTC34	protein_coding	human	62.9184	94.6206	68.5233	71.0827	99.3246	76.9322	39.4103	96.3825	52.5371	59.0547	65.1362	40.1196	72.5684	77.9952	53.7265	-1.29611	-0.20636	-0.640783	-1.03163	-0.00549398	-0.313157	0.281822	0.210514	0.325722	1.11523	-0.427352	0.670307	1.058	-0.309306	0.725249	0.266389	0.230311	0.2401	0.242172	0.230752	0.252088	0.318279	0.256555	0.290195	0.291955	0.268852	0.313935	0.270664	0.27904	0.297008	-4.86548
ENSG00000285945	AC242022.2	lncRNA	human	0	0	0	0	0	0	0	0	0	0	0	0	0	0	0	NA	NA	NA	NA	NA	NA	NA	NA	NA	NA	NA	NA	NA	NA	NA	NA	NA	NA	NA	NA	NA	NA	NA	NA	NA	NA	NA	NA	NA	NA	NA
ENSG00000283259	AC242022.1	lncRNA	human	0	0	0	0	0	0	0	0	0	0	0	0	0	0	0	NA	NA	NA	NA	NA	NA	NA	NA	NA	NA	NA	NA	NA	NA	NA	NA	NA	NA	NA	NA	NA	NA	NA	NA	NA	NA	NA	NA	NA	NA	NA
ENSG00000233234	AL592464.2	lncRNA	human	0	0	0	0	0	0	0	0	0	0	0	0	0	0	0	NA	NA	NA	NA	NA	NA	NA	NA	NA	NA	NA	NA	NA	NA	NA	NA	NA	NA	NA	NA	NA	NA	NA	NA	NA	NA	NA	NA	NA	NA	NA
ENSG00000287396	AL592464.3	lncRNA	human	0	0	0.742089	0	0	0.330227	0	0	0.92872	0	0.777918	0.681393	0	0.334732	0.323165	NA	NA	3.25998	NA	NA	2.08048	NA	NA	-1.12881	NA	3.39759	3.01655	NA	2.12513	2.02383	NA	NA	2.48443	NA	NA	3.72048	NA	NA	2.16177	NA	2.42912	2.51147	NA	3.61864	3.71779	NA
ENSG00000231630	AL592464.1	lncRNA	human	0	0	0	0	0	0	0	0	0	0	0	0	0	0	0	NA	NA	NA	NA	NA	NA	NA	NA	NA	NA	NA	NA	NA	NA	NA	NA	NA	NA	NA	NA	NA	NA	NA	NA	NA	NA	NA	NA	NA	NA	NA
ENSG00000284745	AL589702.1	lncRNA	human	0	0	0	0	0	0	0	0	0	0	0	0	0	0	0	NA	NA	NA	NA	NA	NA	NA	NA	NA	NA	NA	NA	NA	NA	NA	NA	NA	NA	NA	NA	NA	NA	NA	NA	NA	NA	NA	NA	NA	NA	NA
ENSG00000169717	ACTRT2	protein_coding	human	0	0	0	0	0	0	0	0	0	0	0	0	0	0	0	NA	NA	NA	NA	NA	NA	NA	NA	NA	NA	NA	NA	NA	NA	NA	NA	NA	NA	NA	NA	NA	NA	NA	NA	NA	NA	NA	NA	NA	NA	NA
ENSG00000177133	PRDM16-DT	lncRNA	human	1.25277	2.07157	1.02599	1.09328	1.34255	1.25025	0.503995	1.46506	0.525655	1.36939	1.11949	0.50326	0.515118	0.732779	0.532055	-1.27363	0.101922	-1.98661	-2.3746	-1.51712	-1.10965	-1.09241	-1.6008	0.901472	1.40548	-2.07451	-0.708569	0.937256	0.397106	1.30167	1.7791	1.37109	2.01306	1.98825	1.79995	1.80183	2.68371	1.8311	2.67543	1.7708	2.04211	2.69758	2.86893	2.40867	2.71797	-0.715888
ENSG00000142611	PRDM16	protein_coding	human	15.4476	21.6545	20.2683	17.6206	18.6118	21.7993	10.6537	16.9742	19.0764	13.9274	19.0889	13.7407	13.204	17.8801	16.9607	-1.11176	-0.316372	0.0651137	-0.838	-0.76076	0.223997	0.294211	-0.440426	0.157955	0.826513	0.38348	1.19636	0.105571	0.986869	1.07085	0.526009	0.435276	0.446443	0.488512	0.469677	0.454865	0.594172	0.479457	0.464361	0.528198	0.448997	0.538572	0.539585	0.491048	0.510115	-2.11357
ENSG00000283572	MIR4251	miRNA	human	0.173599	0.214529	0	0	0	0	0.168875	0.217613	0	0.37836	0.183172	0.14777	0	0	0	1.22054	0.941774	NA	NA	NA	NA	-1.13359	-0.980163	NA	-0.261334	-0.482655	-0.746246	NA	NA	NA	4.08047	4.06594	NA	NA	NA	NA	4.08047	4.06602	NA	3.1607	4.06596	4.08047	NA	NA	NA	0.299116
ENSG00000226286	AL008733.1	lncRNA	human	0.399197	0	0	0.153878	0	0	0.52833	0	0	0.412731	0	0.338474	0.154182	0	0.133614	2.2309	NA	NA	1.03172	NA	NA	-1.16364	NA	NA	-2.32707	NA	-1.75612	-1.04106	NA	-0.628535	3.38303	NA	NA	4.08047	NA	NA	2.81183	NA	NA	3.25405	NA	3.53776	4.08047	NA	4.08047	0.659439
ENSG00000279839	AL512383.1	TEC	human	0.518904	1.7789	0.478614	0.512222	0.961185	0.501526	0.35218	2.07261	0.32364	1.51295	1.39512	0.334424	0.770462	0.726874	0.340021	-0.690347	1.97096	-0.491773	-0.878639	0.840241	-0.555352	-0.171807	-1.09294	-0.0655587	2.67288	-2.43902	0.21554	1.73133	-1.37428	0.333251	2.71189	1.60698	2.78297	2.73708	2.04049	2.78815	3.24726	1.39097	3.38331	1.76477	1.81696	3.32458	2.32533	2.38377	3.40135	-0.254563
ENSG00000272235	AL590438.1	lncRNA	human	0.169606	0.393857	0.158492	0.180913	0.187804	0.161958	0	0.203333	0	0.185554	0.17073	0	0	0	0	-0.703018	-0.0375543	-0.50416	-0.89183	-1.00226	-0.569223	NA	-0.980163	NA	0.720002	-0.482655	NA	NA	NA	NA	4.08047	3.22284	4.08047	4.08047	4.08047	4.08047	NA	4.06602	NA	4.06582	4.06596	NA	NA	NA	NA	-0.172288
ENSG00000287828	AL354743.2	lncRNA	human	0.684888	0.194015	0.158492	0.352552	0.350537	0.161958	0.664333	0.169619	0	0.534322	0	0.438105	0.332675	0.14088	0.149187	1.6805	-1.09864	-0.50416	0.0699548	-0.0404753	-0.569223	-1.60168	1.0595	NA	-2.73997	NA	-2.16231	-0.0792797	-0.526457	-0.628535	2.61354	4.08047	4.08047	3.33996	3.3085	4.08047	2.58555	4.08047	NA	2.93984	NA	3.18892	3.3545	4.08047	4.08047	0.642997
ENSG00000286518	AL354743.1	lncRNA	human	0	0	0	0	0.182186	0	0	0.19265	0	0	0	0	0.180468	0.159376	0	NA	NA	NA	NA	0.921293	NA	NA	1.0595	NA	NA	NA	NA	0.88249	-0.526457	NA	NA	NA	NA	NA	4.08047	NA	NA	4.08047	NA	NA	NA	NA	4.08047	4.08047	NA	NA
ENSG00000130762	ARHGEF16	protein_coding	human	193.711	225.573	191.508	208.869	221.271	192.607	175.727	216.618	160.063	189.049	187.579	161.11	200.267	184.491	174.047	-0.244753	-0.205733	-0.0798045	-0.215644	-0.163629	-0.126318	0.0459905	0.0435297	-0.0468627	0.0753778	0.126746	0.182394	0.0830893	0.0391105	0.100063	0.157376	0.143025	0.154221	0.141911	0.1406	0.161309	0.154236	0.13799	0.170111	0.153834	0.152342	0.16741	0.138068	0.156586	0.159545	-1.55522
ENSG00000272088	AL512413.1	lncRNA	human	0.686726	1.54411	0.361364	0.814186	0.828556	0.555707	1.09049	2.04512	0.51127	1.78545	1.36597	0.626094	1.26755	0.956248	0.931696	1.68709	2.7828	0.457628	1.88897	1.83133	1.32659	0.215297	-0.914839	0.861009	1.09731	-2.32721	-1.21318	-0.0361357	-0.515353	-0.566538	2.44416	1.86044	3.29499	2.3192	2.1648	2.87816	1.87324	1.40862	2.87401	1.53912	1.89126	2.47608	1.69571	2.03479	2.19165	0.690254
ENSG00000162591	MEGF6	protein_coding	human	142.856	220.589	130.776	170.789	228.11	130.219	151.986	291.703	104.662	197.079	180.755	115.3	236.404	187.63	137.971	-0.101198	0.694877	-0.167306	0.219051	0.830588	-0.248175	0.337731	0.13472	-0.0812268	0.831833	-0.858697	-0.0491564	0.643187	-1.07659	-0.456262	0.193909	0.184164	0.208515	0.177397	0.162965	0.197182	0.17878	0.163412	0.215134	0.184776	0.200163	0.212837	0.152957	0.169711	0.184512	-0.521884
ENSG00000207776	MIR551A	miRNA	human	0	0.1846	0	0	0	0	0	0.187903	0	0.170474	0.15774	0	0	0	0	NA	1.29666	NA	NA	NA	NA	NA	-1.33638	NA	1.07291	-0.83787	NA	NA	NA	NA	NA	4.05588	NA	NA	NA	NA	NA	4.05592	NA	4.05584	4.05589	NA	NA	NA	NA	NA
ENSG00000238260	AL513320.1	lncRNA	human	1.7769	2.71881	2.6593	2.93836	3.18196	2.22344	2.07665	3.29657	2.24901	1.82727	2.746	1.88985	3.47446	2.69001	2.47744	-1.11557	-0.160511	0.448397	0.369646	0.446883	-0.0772838	1.5034	0.631461	-0.521608	1.01788	0.614865	1.58098	0.107282	-0.51726	-0.431278	1.52397	1.22508	1.18921	1.15351	1.08163	1.3168	1.4375	1.10614	1.28198	1.51894	1.20579	1.4814	1.04057	1.18717	1.26388	-0.732013
ENSG00000158109	TPRG1L	protein_coding	human	708.117	865.434	657.95	744.226	835.582	683.986	671.624	917.798	570.589	779.441	723.696	591.39	791.344	724.064	644.702	-0.046682	0.129799	-0.0672608	-0.0929062	0.12258	-0.0162351	-0.0294202	-0.00595218	0.0504165	0.212111	-0.195871	-0.00398895	0.246661	-0.136797	0.0875024	0.0831761	0.0848408	0.0877859	0.0810495	0.0835566	0.0945892	0.0783204	0.080365	0.0978675	0.0810234	0.0865133	0.0858698	0.0784136	0.0920719	0.091736	-0.561244
ENSG00000116213	WRAP73	protein_coding	human	374.969	500.107	386.524	406.201	489.736	399.305	323.72	527.039	331.06	405.369	415.83	310.59	430.172	419.596	347.104	-0.386711	0.0726693	-0.0820592	-0.34068	0.102063	-0.0519431	0.0625191	0.0297932	0.029979	0.495148	-0.153558	0.321297	0.474204	-0.151347	0.299585	0.11468	0.106146	0.114134	0.117313	0.104484	0.120292	0.115105	0.0933729	0.116076	0.102804	0.103157	0.112476	0.104786	0.107008	0.121089	-3.3721
ENSG00000078900	TP73	protein_coding	human	9.94208	11.4361	9.12766	13.0153	12.6127	10.4622	11.7806	13.0525	8.62167	10.2565	9.4063	8.17568	14.5356	11.7729	12.0924	-0.0597159	-0.0256158	-0.105744	0.479159	0.317603	0.194438	0.556886	0.342294	0.30283	0.0702183	-0.0755806	-0.0311143	-0.133271	-0.119899	-0.272891	0.606837	0.576515	0.663454	0.604635	0.560821	0.61095	0.614973	0.549872	0.676868	0.585621	0.648956	0.679547	0.581214	0.583878	0.629136	-0.0984051
ENSG00000227589	AL136528.1	lncRNA	human	0	0.0922998	0	0	0.162733	0	0	0.263571	0	0.085237	0.0788701	0	0.159618	0.14088	0	NA	0.766694	NA	NA	0.921293	NA	NA	0.15387	NA	0.54332	-0.30784	NA	0.88249	-0.526457	NA	NA	4.0717	NA	NA	4.08047	NA	NA	3.65912	NA	4.07162	4.07171	NA	4.08047	4.08047	NA	NA
ENSG00000235131	AL136528.2	lncRNA	human	0	0	0.202873	0	0	0	0	0	0.177629	0	0.21295	0.186253	0	0	0	NA	NA	1.41939	NA	NA	NA	NA	NA	-1.02734	NA	1.55757	1.17731	NA	NA	NA	NA	NA	4.08047	NA	NA	NA	NA	NA	4.08047	NA	4.08047	4.08047	NA	NA	NA	NA
ENSG00000227372	TP73-AS1	transcribed_unitary_pseudogene	human	406.535	519.285	417.301	448.198	504.171	416.016	355.279	516.574	340.612	415.195	426.545	332.623	444.667	411.661	363.883	-0.408739	-0.0659365	-0.115416	-0.305138	-0.0651854	-0.194034	0.120199	0.00172717	-0.0792828	0.37909	-0.0484148	0.310014	0.271444	-0.126807	0.121753	0.108046	0.104378	0.109066	0.11062	0.104975	0.119828	0.110093	0.101393	0.119909	0.103262	0.105304	0.109565	0.107831	0.116582	0.122864	-3.78301
ENSG00000276189	AL136528.3	misc_RNA	human	0	0	0	0	0	0	0	0	0	0	0	0	0	0	0	NA	NA	NA	NA	NA	NA	NA	NA	NA	NA	NA	NA	NA	NA	NA	NA	NA	NA	NA	NA	NA	NA	NA	NA	NA	NA	NA	NA	NA	NA	NA
ENSG00000162592	CCDC27	protein_coding	human	0	0	0.180185	0.171638	0	0.211506	0.15897	0	0.338025	0	0.18866	0.165187	0.173057	0.21503	0.356795	NA	NA	1.41939	1.03172	NA	1.35433	0.789963	NA	-0.0655585	NA	1.55757	1.17731	-1.04106	1.3971	0.333252	NA	NA	4.08047	4.08047	NA	4.08047	4.08047	NA	3.33172	NA	4.08047	4.08047	4.08047	4.08047	3.34381	NA
ENSG00000235169	SMIM1	protein_coding	human	14.7521	16.3355	13.5789	12.0341	15.96	15.1558	6.54934	10.8127	9.01087	10.129	9.24241	8.50146	6.86967	10.5413	7.26939	-0.905077	-1.0928	-1.00478	-2.60089	-1.04074	-0.649541	-1.67021	0.0498638	0.354285	-0.144103	0.0882627	-0.074333	1.58865	0.394961	1.96221	0.536159	0.501254	0.546128	0.659721	0.486375	0.506445	0.815123	0.592717	0.642953	0.638144	0.653626	0.691012	0.768815	0.587118	0.773175	-1.68808
ENSG00000130764	LRRC47	protein_coding	human	1417.94	1633.2	1301.01	1521.35	1525.1	1296.01	1504.58	1737.12	1174.54	1609	1477.97	1283.48	1615	1376	1370.64	0.226204	0.233078	0.174281	0.239125	0.136733	0.102762	0.0298796	-0.0947639	-0.0717915	0.0424571	-0.0573687	-0.0352693	-0.0711467	-0.031872	-0.125685	0.0679148	0.0700583	0.0678981	0.0636727	0.0678175	0.0794319	0.0587419	0.0632711	0.0772024	0.0654218	0.0656893	0.0644872	0.0591345	0.0752045	0.0737864	3.3307
ENSG00000266075	RN7SL574P	misc_RNA	human	0.635855	0.594361	0.408123	0.637361	0.648723	0.416896	0.35218	0.263571	0	0.291602	0.0788701	0.169237	0.332675	0.14088	0.149187	-1.17841	-1.62383	-1.93613	-1.36701	-1.48042	-2	-0.171807	0.15387	NA	-0.41553	-0.30784	-0.746246	-0.0792797	-0.526457	-0.628535	2.50104	2.56092	3.06688	2.51233	2.4748	3.10213	3.24726	3.65912	NA	3.45332	4.07171	4.08047	3.3545	4.08047	4.08047	-0.471168
ENSG00000272153	AL365330.1	lncRNA	human	1.26745	0.264713	0.926059	0.824237	1.3153	0.536443	1.69907	1.29989	1.0195	1.24281	0.904353	1.67239	1.79884	1.39738	0.95868	2.76802	-0.193576	2.36338	1.942	2.66424	1.32691	-0.797454	2.83713	-1.05317	-2.90491	2.54309	-0.385435	0.746908	-1.35165	-0.620602	1.9153	3.71199	2.11522	2.18612	1.86049	2.91202	1.44214	1.84418	1.98507	1.87123	2.09692	1.45312	1.40195	1.76317	2.05252	1.44521
ENSG00000116198	CEP104	protein_coding	human	1133.98	1325.62	1041.84	1192.09	1281.82	1102.14	1130.59	1415.01	954.94	1251.41	1150.18	984.169	1272.95	1171.77	1091.43	0.0954783	0.144007	0.0453367	0.0526577	0.144018	0.140699	-0.0254742	0.00162747	0.0947736	0.0845067	-0.0973448	-0.0333654	0.12267	-0.000909079	0.0985975	0.0741894	0.0700978	0.0723711	0.0671788	0.0685284	0.0801342	0.0680886	0.0651029	0.0818923	0.07206	0.0709263	0.0752001	0.0637965	0.0768051	0.0771957	1.28695
ENSG00000169598	DFFB	protein_coding	human	101.607	143.129	114.579	110.581	137.902	114.074	85.9604	153.332	101.452	114.511	127.283	91.2648	119.731	121.955	98.1066	-0.453597	0.150757	0.115756	-0.390297	0.155705	0.0456081	0.0803312	0.00833319	-0.0709576	0.640807	-0.0345371	0.586443	0.576994	-0.107227	0.446382	0.197067	0.180847	0.192371	0.189689	0.169744	0.193218	0.204112	0.169054	0.20162	0.192894	0.19081	0.207112	0.177468	0.180447	0.200873	-2.30174
ENSG00000198912	C1orf174	protein_coding	human	791.179	936.601	763.696	809.887	888.766	768.318	741.501	960.795	675.116	854.725	823.774	696.674	830.509	785.056	716.03	-0.00387948	0.0846122	0.0842227	-0.127528	0.0255402	0.0402019	-0.106723	-0.0582256	-0.0441897	0.124278	0.000904045	0.104764	0.18406	0.0172273	0.179117	0.0795606	0.0783134	0.0826484	0.079169	0.0808232	0.0921018	0.075905	0.0750097	0.0930425	0.074689	0.0785025	0.0801503	0.0771358	0.0899188	0.0902741	-0.0487612
ENSG00000236423	LINC01134	lncRNA	human	15.9503	21.6634	14.8967	19.6878	21.0768	18.5396	17.5793	24.9551	15.3732	19.3096	17.989	13.1741	22.707	21.1926	19.8654	-0.0830056	0.384916	-0.0929303	0.313449	0.382203	0.449236	0.411588	-0.00332303	0.539729	0.502786	-0.475151	0.00693031	0.0994628	0.0696057	0.145747	0.479829	0.43505	0.498918	0.439191	0.436471	0.474623	0.455004	0.416536	0.508423	0.449382	0.47406	0.519496	0.420569	0.454443	0.457357	-0.17299
ENSG00000233304	LINC01346	lncRNA	human	0	0	0	0.153878	0	0	0.141911	0	0	0	0	0	0.154182	0	0.133614	NA	NA	NA	1.03172	NA	NA	0.789963	NA	NA	NA	NA	NA	-1.04106	NA	-0.628535	NA	NA	NA	4.08047	NA	NA	4.08047	NA	NA	NA	NA	NA	4.08047	NA	4.08047	NA
ENSG00000226374	LINC01345	lncRNA	human	0	0	0	0	0	0	0	0	0	0	0	0	0	0	0	NA	NA	NA	NA	NA	NA	NA	NA	NA	NA	NA	NA	NA	NA	NA	NA	NA	NA	NA	NA	NA	NA	NA	NA	NA	NA	NA	NA	NA	NA	NA
ENSG00000284668	LINC02780	lncRNA	human	0	0	0	0	0	0	0	0	0	0	0	0	0	0	0	NA	NA	NA	NA	NA	NA	NA	NA	NA	NA	NA	NA	NA	NA	NA	NA	NA	NA	NA	NA	NA	NA	NA	NA	NA	NA	NA	NA	NA	NA	NA
ENSG00000284703	AL805961.1	lncRNA	human	0.336455	0.586293	0.894366	0.146382	0.462842	1.45824	0.19321	0.760737	1.80317	0.60272	1.16956	0.872117	0.305547	1.61606	1.2984	0.258768	1.10034	2.33588	-0.89183	0.801144	3.08975	-1.13359	-0.252081	0.750777	0.865523	1.32218	2.09211	1.71435	2.27092	3.99482	3.37481	2.80919	2.23128	4.08047	2.79841	1.86355	4.08047	2.3831	1.45734	2.69723	2.0004	2.21443	3.41155	1.67159	1.95497	0.0766765
ENSG00000229280	EEF1DP6	processed_pseudogene	human	0	0	0	0	0	0	0	0	0	0	0	0	0	0	0	NA	NA	NA	NA	NA	NA	NA	NA	NA	NA	NA	NA	NA	NA	NA	NA	NA	NA	NA	NA	NA	NA	NA	NA	NA	NA	NA	NA	NA	NA	NA
ENSG00000235054	LINC01777	lncRNA	human	0.173599	0	0	0.171638	0	0	0.327845	0	0	0.180183	0	0.14777	0.173057	0	0.149187	1.22054	NA	NA	1.03172	NA	NA	-0.171807	NA	NA	-1.32153	NA	-0.746246	-1.04106	NA	-0.628535	4.08047	NA	NA	4.08047	NA	NA	3.32944	NA	NA	4.08047	NA	4.08047	4.08047	NA	4.08047	0.299116
ENSG00000284694	AL355602.1	lncRNA	human	0	0	0	0	0	0	0	0	0	0	0	0	0	0	0	NA	NA	NA	NA	NA	NA	NA	NA	NA	NA	NA	NA	NA	NA	NA	NA	NA	NA	NA	NA	NA	NA	NA	NA	NA	NA	NA	NA	NA	NA	NA
ENSG00000227169	Z98747.1	lncRNA	human	0	0	0	0	0	0	0	0	0	0	0	0	0	0	0	NA	NA	NA	NA	NA	NA	NA	NA	NA	NA	NA	NA	NA	NA	NA	NA	NA	NA	NA	NA	NA	NA	NA	NA	NA	NA	NA	NA	NA	NA	NA
ENSG00000232596	LINC01646	lncRNA	human	0	0	0	0	0	0	0	0	0	0	0	0	0	0	0	NA	NA	NA	NA	NA	NA	NA	NA	NA	NA	NA	NA	NA	NA	NA	NA	NA	NA	NA	NA	NA	NA	NA	NA	NA	NA	NA	NA	NA	NA	NA
ENSG00000196581	AJAP1	protein_coding	human	0	0	0	0	0	0	0	0	0	0	0	0	0	0	0	NA	NA	NA	NA	NA	NA	NA	NA	NA	NA	NA	NA	NA	NA	NA	NA	NA	NA	NA	NA	NA	NA	NA	NA	NA	NA	NA	NA	NA	NA	NA
ENSG00000287586	Z98886.1	lncRNA	human	0	0	0	0	0.162733	0	0	0.169619	0	0	0	0	0.159618	0.14088	0	NA	NA	NA	NA	0.921293	NA	NA	1.0595	NA	NA	NA	NA	0.88249	-0.526457	NA	NA	NA	NA	NA	4.08047	NA	NA	4.08047	NA	NA	NA	NA	4.08047	4.08047	NA	NA
ENSG00000284739	BX005132.1	lncRNA	human	0	0	0	0	0	0	0	0	0	0	0	0	0	0	0	NA	NA	NA	NA	NA	NA	NA	NA	NA	NA	NA	NA	NA	NA	NA	NA	NA	NA	NA	NA	NA	NA	NA	NA	NA	NA	NA	NA	NA	NA	NA
ENSG00000284674	LINC02781	lncRNA	human	0	0	0	0	0	0	0	0	0	0	0	0	0	0	0	NA	NA	NA	NA	NA	NA	NA	NA	NA	NA	NA	NA	NA	NA	NA	NA	NA	NA	NA	NA	NA	NA	NA	NA	NA	NA	NA	NA	NA	NA	NA
ENSG00000231510	LINC02782	lncRNA	human	0	0	0	0	0	0	0	0	0	0	0	0	0	0	0	NA	NA	NA	NA	NA	NA	NA	NA	NA	NA	NA	NA	NA	NA	NA	NA	NA	NA	NA	NA	NA	NA	NA	NA	NA	NA	NA	NA	NA	NA	NA
ENSG00000284616	AL139823.1	lncRNA	human	0	0.214529	0	0	0	0	0	0.217613	0	0.198177	0.183172	0	0	0	0	NA	0.941774	NA	NA	NA	NA	NA	-0.980163	NA	0.720002	-0.482655	NA	NA	NA	NA	NA	4.06594	NA	NA	NA	NA	NA	4.06602	NA	4.06582	4.06596	NA	NA	NA	NA	NA
ENSG00000284692	Z98259.3	lncRNA	human	0	0	0	0	0	0	0	0	0	0	0	0	0	0	0	NA	NA	NA	NA	NA	NA	NA	NA	NA	NA	NA	NA	NA	NA	NA	NA	NA	NA	NA	NA	NA	NA	NA	NA	NA	NA	NA	NA	NA	NA	NA
ENSG00000284666	Z98259.2	lncRNA	human	0	0	0	0	0	0	0	0	0	0	0	0	0	0	0	NA	NA	NA	NA	NA	NA	NA	NA	NA	NA	NA	NA	NA	NA	NA	NA	NA	NA	NA	NA	NA	NA	NA	NA	NA	NA	NA	NA	NA	NA	NA
ENSG00000260972	Z98259.1	lncRNA	human	0	0	0	0	0	0	0	0	0	0	0	0	0	0	0	NA	NA	NA	NA	NA	NA	NA	NA	NA	NA	NA	NA	NA	NA	NA	NA	NA	NA	NA	NA	NA	NA	NA	NA	NA	NA	NA	NA	NA	NA	NA
ENSG00000283356	Z97988.2	unprocessed_pseudogene	human	0	0	0	0	0	0	0	0	0	0	0	0	0	0	0	NA	NA	NA	NA	NA	NA	NA	NA	NA	NA	NA	NA	NA	NA	NA	NA	NA	NA	NA	NA	NA	NA	NA	NA	NA	NA	NA	NA	NA	NA	NA
ENSG00000236948	AL365255.1	lncRNA	human	0	0	0	0.153878	0	0	0.141911	0	0	0	0	0	0.154182	0	0.133614	NA	NA	NA	1.03172	NA	NA	0.789963	NA	NA	NA	NA	NA	-1.04106	NA	-0.628535	NA	NA	NA	4.08047	NA	NA	4.08047	NA	NA	NA	NA	NA	4.08047	NA	4.08047	NA
ENSG00000264341	Z97988.1	miRNA	human	0	0	0	0	0	0	0	0	0	0	0	0	0	0	0	NA	NA	NA	NA	NA	NA	NA	NA	NA	NA	NA	NA	NA	NA	NA	NA	NA	NA	NA	NA	NA	NA	NA	NA	NA	NA	NA	NA	NA	NA	NA
ENSG00000264101	MIR4689	miRNA	human	0.856042	1.26292	1.04431	0.73191	1.07161	0.822657	0.168454	0.810698	0.492686	0.619372	0.831213	0.5177	0.305547	0.437245	0.161583	-1.83904	-0.66269	-0.716973	-2.9861	-1.29515	-1.70917	-1.13359	-0.631606	-0.998651	1.20006	-0.0447639	1.15254	1.71435	-0.402929	1.29502	2.42706	1.93146	2.24029	2.70817	2.10157	2.50164	4.08047	2.14788	2.90896	2.4497	2.23335	2.84573	3.41155	2.86108	4.08047	-0.757725
ENSG00000131697	NPHP4	protein_coding	human	411.798	474.635	417.017	458.804	453.277	438.519	358.398	403.478	349.735	366.675	376.29	326.567	392.018	378.422	383.865	-0.454235	-0.432834	-0.19622	-0.311274	-0.485237	-0.11073	0.159935	-0.051139	0.0846106	0.0566558	0.23845	0.274821	-0.142651	0.376725	0.210961	0.105143	0.105526	0.10473	0.102457	0.101262	0.112065	0.108104	0.107682	0.116962	0.111028	0.111706	0.111972	0.105323	0.11372	0.115877	-4.32015
ENSG00000069424	KCNAB2	protein_coding	human	826.542	904.107	673.777	928.693	888.408	707.013	875.726	915.78	536.105	850.748	691.836	635.537	938.713	712.943	749.931	0.0825938	-0.0537167	-0.332528	0.224304	-0.0117831	-0.249158	0.158979	0.0432364	0.0827492	-0.100479	-0.277113	-0.398387	-0.204812	-0.235232	-0.462799	0.0788211	0.0785382	0.0886146	0.0722373	0.0779244	0.0927422	0.0714855	0.0768082	0.103068	0.0776901	0.0885773	0.0890787	0.0717724	0.0919044	0.0873585	1.04787
ENSG00000116254	CHD5	protein_coding	human	40.5802	48.7168	46.7536	47.3196	51.9359	42.3185	49.2661	63.7107	48.6689	50.8282	56.7459	47.8832	61.2128	54.608	50.2162	0.425108	0.548821	0.920508	0.645661	0.771987	0.638662	0.238152	0.222482	-0.282691	0.160285	0.372134	0.512918	0.157114	-0.130615	0.003704	0.316989	0.282344	0.286826	0.302544	0.277104	0.307327	0.299155	0.246313	0.27841	0.278925	0.25599	0.288366	0.266319	0.27092	0.296267	1.34108
ENSG00000285629	AL031847.2	protein_coding	human	0.319306	0.795485	0.298428	0.802218	1.04918	0.892776	0.425733	1.16907	0.503689	0.396355	0.366345	0	1.14988	1.20455	0.977639	-1.66076	0.117064	-1.46158	0.506697	0.978039	0.962841	2.15005	0.90245	2.41516	1.86905	-1.64131	NA	0.494185	-0.0147409	0.462342	3.3912	2.37731	3.48179	2.32269	1.99771	2.14852	3.2031	2.02702	2.81366	3.313	3.47926	NA	1.97902	1.85842	2.13887	-0.489726
ENSG00000116251	RPL22	protein_coding	human	1540.88	1716.5	1420.2	1661.34	1650.11	1347.64	1646.29	1825.5	1233.42	1698.61	1566.73	1403.72	1760.19	1431.25	1440.93	0.234381	0.152772	0.194656	0.261008	0.133484	-0.014632	0.0435698	-0.0182307	-0.208772	-0.0456564	0.0431115	-0.0230438	-0.0964222	-0.145225	-0.263665	0.0665928	0.0701618	0.0711031	0.0640962	0.0684797	0.0969561	0.0545116	0.0611554	0.0956898	0.0609143	0.0654768	0.0618309	0.056692	0.0914891	0.0900437	3.51962
ENSG00000226944	AL031847.1	lncRNA	human	11.2101	13.4804	11.3306	13.945	11.277	11.0089	12.1601	11.6853	9.57896	11.6261	11.7524	9.79002	12.255	9.47189	11.8028	-0.182332	-0.0681957	0.0537339	0.254813	-0.498003	-0.102632	0.455907	-0.430247	-0.156571	0.15107	0.120565	0.252544	-0.722813	0.398032	-0.349127	0.575522	0.543719	0.580287	0.523082	0.572745	0.595276	0.547719	0.574563	0.62399	0.566747	0.578555	0.610233	0.552069	0.624974	0.574014	-0.316811
ENSG00000158286	RNF207	protein_coding	human	707.521	831.332	622.435	834.177	833.754	627.315	740.355	865.721	479.629	732.844	643.781	546.241	865.127	651.676	654.183	-0.105779	-0.0345233	-0.296356	0.176766	0.065488	-0.343957	0.298481	0.0949316	-0.0489572	0.113649	-0.266818	-0.173884	-0.0816771	-0.40583	-0.510321	0.240175	0.242941	0.239039	0.23647	0.262976	0.147859	0.0901967	0.112367	0.110316	0.0999536	0.103875	0.100692	0.104524	0.120381	0.1009	-0.440424
ENSG00000116237	ICMT	protein_coding	human	4491.37	4662.6	3769.53	4678.46	4574.61	3747.32	4820.06	4932.75	3261.49	4820.95	4060.62	3902.77	4924.86	3954.09	4044.63	0.348059	0.0772092	0.0556141	0.284268	0.114798	-0.0242308	-0.046787	0.0386345	-0.0802132	-0.23479	-0.0204948	-0.275729	-0.138187	-0.136771	-0.29768	0.0554451	0.0589307	0.057695	0.0535609	0.0609802	0.0690315	0.0400143	0.0479996	0.0626119	0.0458407	0.0485392	0.0457794	0.0454997	0.0622333	0.0588068	6.27755
ENSG00000225077	LINC00337	lncRNA	human	17.4499	17.4112	14.9744	17.0013	16.2029	17.3577	16.1135	14.9829	14.0728	16.4417	13.9902	14.1335	14.7175	15.3222	15.9705	0.0918295	-0.273992	-0.169148	-0.180444	-0.462541	0.186667	-0.254924	-0.183555	0.35496	-0.331189	0.114712	-0.24406	-0.250975	0.651699	0.377325	0.465212	0.484019	0.504609	0.464045	0.475617	0.476124	0.47469	0.515144	0.525503	0.492542	0.540227	0.519693	0.493785	0.501726	0.491371	0.197393
ENSG00000173673	HES3	protein_coding	human	0.169606	0.194015	0.158492	0.180913	0.350537	0.161958	0	0.169619	0	0	0	0	0.159618	0.14088	0	-0.703018	-1.09864	-0.50416	-0.89183	-0.0404753	-0.569223	NA	1.0595	NA	NA	NA	NA	0.88249	-0.526457	NA	4.08047	4.08047	4.08047	4.08047	3.3085	4.08047	NA	4.08047	NA	NA	NA	NA	4.08047	4.08047	NA	-0.172288
ENSG00000158292	GPR153	protein_coding	human	93.4219	108.25	84.8202	100.534	94.0609	92.6141	78.394	83.323	65.2747	84.1243	75.9558	65.408	77.1315	71.6107	77.6766	-0.443877	-0.413028	-0.546499	-0.41532	-0.79959	-0.321149	0.0462218	-0.386682	0.225103	0.0671331	-0.132695	-0.0860491	-0.354306	0.481945	0.105076	0.207595	0.193829	0.216295	0.200116	0.207183	0.216454	0.220628	0.217082	0.246313	0.213853	0.225398	0.239755	0.224411	0.239345	0.232766	-2.13818
ENSG00000097021	ACOT7	protein_coding	human	1352.4	1528.47	1248.37	1442.18	1455.13	1288.68	1307.24	1484.87	1071.88	1379.35	1272.68	1126.71	1399.44	1247.71	1237.13	-0.035624	-0.0858535	-0.0753828	-0.0388899	-0.131944	-0.0458301	0.0137523	-0.0434366	0.0287967	-0.0155199	0.0116046	-0.0232871	-0.061564	0.0878843	0.00333251	0.0715864	0.0788525	0.0822838	0.0695248	0.0736757	0.0830016	0.0596382	0.0690964	0.0865428	0.0694423	0.0806207	0.0748625	0.0614345	0.0748256	0.0731467	-0.497636
ENSG00000271746	AL031848.2	lncRNA	human	4.00236	4.63216	2.63929	4.20636	5.52684	3.82428	3.81342	5.78407	2.25728	4.17723	2.74608	2.36127	5.28086	4.76357	3.61525	-0.052459	-0.0328197	-1.33283	-0.107362	0.511122	-0.0581727	-0.0383138	0.547745	1.28035	0.057429	-1.30417	-1.26932	0.655476	-0.573299	0.0587578	0.994908	0.933349	1.3139	0.95711	0.840586	1.01549	0.962363	0.803247	1.33352	0.935654	1.25937	1.32373	0.827204	0.879939	0.994123	-0.0527275
ENSG00000069812	HES2	protein_coding	human	31.3989	41.7917	31.9724	35.3407	36.0906	31.1759	25.5789	35.5895	23.1666	30.925	31.5725	23.2464	29.4492	25.8378	25.4044	-0.654603	-0.146282	-0.36516	-0.476353	-0.542147	-0.531852	0.195663	-0.393867	-0.166426	0.543091	-0.215971	0.306703	-0.0335309	0.0117508	-0.0443047	0.356314	0.329118	0.350591	0.342405	0.327774	0.370468	0.383384	0.343543	0.404421	0.366562	0.364735	0.394089	0.358601	0.38614	0.402657	-1.83715
ENSG00000187017	ESPN	protein_coding	human	3.43869	4.90376	4.79967	5.1364	4.2196	4.59231	2.42144	2.66944	3.38009	2.03155	3.54699	2.38459	3.0511	2.72485	3.55661	-2.40973	-1.10573	-0.35354	-0.593558	-1.69561	-0.573886	1.83413	-0.595918	-0.221222	1.35676	0.742679	2.06621	-1.06877	1.11189	0.0253713	1.20583	0.914061	0.884611	0.857496	0.996883	0.927817	1.31781	1.20782	1.04779	1.40825	1.04726	1.33865	1.12128	1.19591	1.0372	-1.9984
ENSG00000265392	MIR4252	miRNA	human	0	0	0	0	0	0	0	0	0	0	0	0	0	0	0	NA	NA	NA	NA	NA	NA	NA	NA	NA	NA	NA	NA	NA	NA	NA	NA	NA	NA	NA	NA	NA	NA	NA	NA	NA	NA	NA	NA	NA	NA	NA
ENSG00000231868	AL031848.1	lncRNA	human	0	0.0922998	0	0	0	0	0	0.0939515	0	0.085237	0.0788701	0	0	0	0	NA	0.766694	NA	NA	NA	NA	NA	-0.806158	NA	0.54332	-0.30784	NA	NA	NA	NA	NA	4.0717	NA	NA	NA	NA	NA	4.07175	NA	4.07162	4.07171	NA	NA	NA	NA	NA
ENSG00000215788	TNFRSF25	protein_coding	human	33.5407	59.0758	44.6942	34.6393	60.5794	41.0548	17.042	67.0316	34.3756	38.4203	49.6801	28.0238	41.8631	47.3175	24.9528	-1.3808	0.187419	-0.0472295	-1.56633	0.316105	-0.377218	-0.168934	0.126662	-0.329997	1.59485	-0.230272	1.35	1.91142	-0.689419	1.20031	0.378589	0.27403	0.312198	0.37303	0.26224	0.326286	0.497497	0.251613	0.348707	0.355617	0.297622	0.4049	0.342013	0.299411	0.423552	-3.64722
ENSG00000171680	PLEKHG5	protein_coding	human	126.899	199.012	139.309	140.723	181.873	138.297	101.485	212.42	112.929	152.879	164.014	103.271	152.529	148.315	112.865	-0.650385	0.317893	-0.120301	-0.511322	0.151415	-0.210084	0.156251	-0.169293	-0.0899794	1.00464	-0.437773	0.546733	0.692108	-0.358139	0.311904	0.194926	0.168249	0.189999	0.187885	0.169955	0.193714	0.190845	0.147174	0.189013	0.16769	0.165655	0.193235	0.16537	0.170389	0.189643	-3.33657
ENSG00000162408	NOL9	protein_coding	human	2524.66	2533.04	1988.79	2673.1	2453.56	2020.6	2978.73	2832.68	1837.46	2874.3	2300.62	2274.32	2949.29	2259.54	2444.99	0.623394	0.285579	0.18833	0.603539	0.288836	0.171508	-0.00289588	0.00427011	-0.0171468	-0.30232	-0.0958571	-0.418363	-0.283618	-0.114763	-0.421329	0.0547649	0.0605068	0.0595236	0.0521504	0.0654977	0.0692358	0.0442331	0.0594547	0.0682334	0.0529552	0.0575478	0.0525662	0.0543503	0.0710144	0.0618464	11.3831
ENSG00000253022	RNU6-731P	snRNA	human	0	0	0	0	0	0	0	0	0	0	0	0	0	0	0	NA	NA	NA	NA	NA	NA	NA	NA	NA	NA	NA	NA	NA	NA	NA	NA	NA	NA	NA	NA	NA	NA	NA	NA	NA	NA	NA	NA	NA	NA	NA
ENSG00000229519	AL591866.1	processed_pseudogene	human	0	0	0	0	0	0	0	0	0	0	0	0	0	0	0	NA	NA	NA	NA	NA	NA	NA	NA	NA	NA	NA	NA	NA	NA	NA	NA	NA	NA	NA	NA	NA	NA	NA	NA	NA	NA	NA	NA	NA	NA	NA
ENSG00000173662	TAS1R1	protein_coding	human	0.1497	0.264713	0.139937	0.15967	0.166899	0.142694	0	0.0939515	0	0.085237	0.0788701	0	0	0	0	-0.703018	-0.193576	-0.50416	-0.89183	-1.00226	-0.569223	NA	-0.806158	NA	0.54332	-0.30784	NA	NA	NA	NA	4.08047	3.71199	4.08047	4.08047	4.08047	4.08047	NA	4.07175	NA	4.07162	4.07171	NA	NA	NA	NA	-0.172288
ENSG00000204859	ZBTB48	protein_coding	human	188.085	287.796	239.804	217.69	284.502	234.132	143.151	304.525	208.298	203.135	256.165	169.968	232.585	246.912	188.828	-0.919588	0.0589627	0.118774	-0.606828	0.113571	-0.0170246	0.329929	0.0556507	-0.135302	1.01388	0.0613183	1.05465	0.751808	-0.128228	0.60077	0.154402	0.125281	0.1365	0.140944	0.125514	0.146276	0.16649	0.120085	0.150781	0.146442	0.130423	0.159319	0.135401	0.140801	0.157119	-5.95581
ENSG00000162413	KLHL21	protein_coding	human	818.795	829.871	558.398	999.776	783.185	583.29	1201.38	1048.49	552.768	1060.59	775.304	756.329	1202.44	760.401	944.913	1.06421	0.786409	0.326357	1.3415	0.731263	0.38131	0.294213	-0.0524074	0.0543093	-0.243241	-0.458251	-0.72127	-0.579207	-0.34793	-0.950021	0.0822448	0.108926	0.0920585	0.0777075	0.0827964	0.0980333	0.0689733	0.0990206	0.0973385	0.0990374	0.107656	0.0816921	0.0699017	0.0881984	0.0849154	12.9396
ENSG00000116273	PHF13	protein_coding	human	507.252	601.214	491.172	522.789	544.539	474.839	491.548	605.553	429.842	562.477	543.238	459.296	525.412	476.119	457.136	0.068729	0.154344	0.165443	-0.032984	-0.0297328	0.010226	-0.0846274	-0.182584	-0.155223	0.121332	0.0120986	0.113178	0.0345906	0.0421349	0.0539124	0.0956842	0.0916005	0.0997717	0.0927433	0.0984756	0.115259	0.090727	0.0920196	0.118759	0.0893997	0.0938072	0.0984827	0.094466	0.116482	0.112916	0.71829
ENSG00000041988	THAP3	protein_coding	human	267.242	361.129	304.002	272.897	352.598	297.861	221.155	390.952	277.073	299.406	336.105	252.644	299.818	321.364	251.519	-0.326834	0.158022	0.246503	-0.47402	0.180713	0.129809	-0.130027	0.0238966	-0.117698	0.521508	0.0895041	0.590625	0.686728	-0.0496554	0.614521	0.131066	0.11522	0.120405	0.128709	0.11574	0.132223	0.13666	0.107558	0.129946	0.121513	0.11301	0.128914	0.121368	0.125459	0.139149	-2.49367
ENSG00000007923	DNAJC11	protein_coding	human	2148.47	2148.59	1806.48	2306.89	2162.62	1859.66	2378.78	2260.89	1627.86	2240.76	1885.59	1878.24	2410.22	1946.34	2068.68	0.361248	-0.0158571	0.0748304	0.375853	0.0959857	0.0938054	0.0314568	0.112728	0.0180397	-0.341518	0.0920358	-0.269784	-0.248792	0.00013202	-0.271711	0.0554174	0.0596073	0.0598878	0.0573257	0.0651985	0.0773254	0.051022	0.060686	0.0764129	0.0543107	0.0587222	0.0549372	0.0598271	0.078976	0.0737756	6.51867
ENSG00000228750	LINC01672	lncRNA	human	0	0	0	0	0	0	0	0	0	0	0	0	0	0	0	NA	NA	NA	NA	NA	NA	NA	NA	NA	NA	NA	NA	NA	NA	NA	NA	NA	NA	NA	NA	NA	NA	NA	NA	NA	NA	NA	NA	NA	NA	NA
ENSG00000284744	AL591163.1	lncRNA	human	0	0	0	0	0.147916	0	0	0.155891	0	0	0	0	0.145929	0.128999	0	NA	NA	NA	NA	0.921293	NA	NA	1.0595	NA	NA	NA	NA	0.88249	-0.526457	NA	NA	NA	NA	NA	4.08047	NA	NA	4.08047	NA	NA	NA	NA	4.08047	4.08047	NA	NA
ENSG00000237436	CAMTA1-DT	lncRNA	human	10.2008	14.5301	14.0577	9.03641	13.1158	12.2743	8.02343	16.3168	14.2113	13.0237	16.8808	12.6315	10.6452	13.7237	10.1065	-0.0711639	0.49523	0.895995	-0.684435	0.321748	0.527787	-0.598562	-0.172012	-0.369341	0.601806	0.400653	0.982409	1.0366	0.206568	1.2265	0.631154	0.530129	0.545105	0.676428	0.539397	0.612062	0.702809	0.477526	0.559498	0.551689	0.485022	0.573056	0.611074	0.554994	0.682908	-0.112752
ENSG00000171735	CAMTA1	protein_coding	human	502.013	589.348	490.889	535.784	565.613	498.366	441.583	547.754	402.177	485.116	475.84	405.02	496.209	461.991	437.266	-0.294495	-0.222347	-0.156991	-0.295935	-0.251129	-0.176424	0.0154066	-0.0275364	-0.0199084	0.108136	0.0662197	0.154148	0.0763773	0.0766467	0.130116	0.101842	0.0969466	0.102673	0.0963002	0.101039	0.108948	0.0972324	0.0955822	0.110784	0.0968887	0.0983809	0.104785	0.0963743	0.108614	0.105626	-2.89168
ENSG00000227950	AL590128.1	processed_pseudogene	human	0	0	0	0	0	0	0	0	0	0	0	0	0	0	0	NA	NA	NA	NA	NA	NA	NA	NA	NA	NA	NA	NA	NA	NA	NA	NA	NA	NA	NA	NA	NA	NA	NA	NA	NA	NA	NA	NA	NA	NA	NA
ENSG00000237365	AL512330.1	lncRNA	human	0	0	0	0	0	0	0	0	0	0	0	0	0	0	0	NA	NA	NA	NA	NA	NA	NA	NA	NA	NA	NA	NA	NA	NA	NA	NA	NA	NA	NA	NA	NA	NA	NA	NA	NA	NA	NA	NA	NA	NA	NA
ENSG00000207056	RNU1-8P	snRNA	human	0	0	0	0	0	0	0	0	0	0	0	0	0	0	0	NA	NA	NA	NA	NA	NA	NA	NA	NA	NA	NA	NA	NA	NA	NA	NA	NA	NA	NA	NA	NA	NA	NA	NA	NA	NA	NA	NA	NA	NA	NA
ENSG00000237402	CAMTA1-IT1	lncRNA	human	0.443318	0.508486	0.414992	0.473677	0.640106	0.424975	0	0.155891	0	0	0	0	0.145929	0.128999	0	-2.15286	-2.54775	-1.95463	-2.34285	-1.49158	-2.0217	NA	1.0595	NA	NA	NA	NA	0.88249	-0.526457	NA	2.97359	2.86203	3.04886	2.9223	2.48488	3.08107	NA	4.08047	NA	NA	NA	NA	4.08047	4.08047	NA	-0.723993
ENSG00000237728	CAMTA1-AS2	lncRNA	human	0	0	0	0.185172	0	0	0.170448	0	0	0	0	0	0.185776	0	0.160598	NA	NA	NA	1.03172	NA	NA	0.789963	NA	NA	NA	NA	NA	-1.04106	NA	-0.628535	NA	NA	NA	4.08047	NA	NA	4.08047	NA	NA	NA	NA	NA	4.08047	NA	4.08047	NA
ENSG00000225126	CAMTA1-AS1	lncRNA	human	0	0	0	0	0	0	0	0	0	0	0	0	0	0	0	NA	NA	NA	NA	NA	NA	NA	NA	NA	NA	NA	NA	NA	NA	NA	NA	NA	NA	NA	NA	NA	NA	NA	NA	NA	NA	NA	NA	NA	NA	NA
ENSG00000270171	AL359881.3	lncRNA	human	0	0	0	0	0	0	0	0	0	0	0	0	0	0	0	NA	NA	NA	NA	NA	NA	NA	NA	NA	NA	NA	NA	NA	NA	NA	NA	NA	NA	NA	NA	NA	NA	NA	NA	NA	NA	NA	NA	NA	NA	NA
ENSG00000270035	AL359881.2	lncRNA	human	0.833981	1.05089	0.984059	0.891581	1.09059	0.965351	0	0.263571	0.318907	0.085237	0.29182	0.186253	0.159618	0.308246	0.161583	-3.07941	-2.56246	-1.92502	-3.27059	-2.42483	-1.9913	NA	0.15387	-0.0655588	0.54332	0.65142	1.17731	0.88249	0.43533	1.29502	2.38688	2.14039	2.18278	2.34988	2.11127	2.22735	NA	3.65912	3.40107	4.07162	3.5168	4.08047	4.08047	3.4801	4.08047	-1.29014
ENSG00000269978	AL359881.1	lncRNA	human	1.26562	1.33255	1.64629	1.26045	1.28872	1.27607	0.645906	0.623347	1.07293	0.669962	1.11384	1.06202	0.600222	0.688058	0.682443	-1.28899	-1.79914	-0.0692367	-1.56438	-1.67684	-1.09377	-0.28711	0.0928299	-1.01581	-0.475135	1.73247	1.23637	-0.0792066	0.645346	0.546451	1.77576	1.77534	1.62672	1.85941	1.83365	1.86021	2.46218	2.53423	2.20331	2.31676	2.09007	2.09145	2.70793	2.60832	2.6441	-0.725881
ENSG00000049245	VAMP3	protein_coding	human	2168.11	2353.58	1829.62	2166.82	2301.73	1853.07	2184.84	2515.8	1572.98	2361.07	2001.12	1843.16	2314.24	1978.21	1861.56	0.269049	0.11797	-0.0148622	0.0899058	0.14616	-0.0409934	-0.16188	0.0292354	-0.0262797	-0.115071	-0.131671	-0.267169	0.0875256	-0.184729	-0.120121	0.0628902	0.0610804	0.0623205	0.0572485	0.061793	0.079022	0.0534273	0.0540458	0.0777712	0.058386	0.0576349	0.0601818	0.0527088	0.0746946	0.0734462	4.27807
ENSG00000269925	Z98884.2	lncRNA	human	15.048	25.0893	19.2105	17.663	21.2913	16.8731	13.1766	26.6766	16.3574	19.7613	23.7742	14.9149	19.0551	18.0573	14.9297	-0.603574	0.481627	0.335833	-0.281205	0.155408	-0.0869995	0.340621	-0.324874	-0.422888	1.12209	-0.148364	0.955248	0.465466	-0.238538	0.205946	0.496906	0.389663	0.50341	0.480247	0.416412	0.477283	0.542955	0.376561	0.543965	0.44318	0.458873	0.563901	0.464366	0.460905	0.52847	-1.21466
ENSG00000049246	PER3	protein_coding	human	235.73	191.671	232.852	262.667	199.527	239.751	276.928	172.128	245.189	212.747	212.748	244.126	244.746	223.898	276.844	0.449443	-0.573246	0.584448	0.556761	-0.318067	0.601491	0.125213	0.256538	0.0160878	-0.988634	1.16098	0.152036	-0.844506	0.921886	0.0548044	0.135886	0.162826	0.134506	0.126932	0.146196	0.148788	0.118059	0.165341	0.138542	0.151606	0.150985	0.127027	0.128675	0.148841	0.132355	3.30749
ENSG00000236266	Z98884.1	lncRNA	human	0.136856	0.157235	0.12825	0.146382	0.152193	0.343014	0	0	0.181205	0	0	0	0	0.21503	0.207607	-0.703018	-1.09864	-0.50416	-0.89183	-1.00226	0.392564	NA	NA	0.896211	NA	NA	NA	NA	1.3971	1.29502	4.08047	4.08047	4.08047	4.08047	4.08047	3.4192	NA	NA	4.08047	NA	NA	NA	NA	4.08047	4.08047	-0.172288
ENSG00000049247	UTS2	protein_coding	human	0	0	0.58593	0	0	0	0	0	0.512077	0	0.61456	0.537693	0	0	0	NA	NA	2.90412	NA	NA	NA	NA	NA	-2.51394	NA	3.04157	2.66044	NA	NA	NA	NA	NA	2.70276	NA	NA	NA	NA	NA	2.79631	NA	2.63975	2.73393	NA	NA	NA	NA
ENSG00000049249	TNFRSF9	protein_coding	human	123.803	113.186	57.2056	136.031	86.8161	59.912	219.196	174.189	78.6336	204.147	129.759	134.278	192.431	109.719	151.061	3.02206	2.64934	1.80278	3.06566	2.24615	1.84304	0.0594096	-0.405579	0.0370579	-0.329812	-0.843353	-1.19596	-0.785376	-0.40085	-1.21021	0.234121	0.257371	0.303789	0.241748	0.260741	0.303719	0.151848	0.17486	0.235242	0.159033	0.203685	0.183153	0.166117	0.203538	0.195496	12.9081
ENSG00000270330	AL009183.1	processed_pseudogene	human	0.199599	0	0	0	0	0	0.19321	0	0	0.206365	0	0.169237	0	0	0	1.22054	NA	NA	NA	NA	NA	-1.13359	NA	NA	-1.32153	NA	-0.746246	NA	NA	NA	4.08047	NA	NA	NA	NA	NA	4.08047	NA	NA	4.08047	NA	4.08047	NA	NA	NA	0.299116
ENSG00000116288	PARK7	protein_coding	human	2367	2644.04	2007.06	2498.87	2449.28	2020.07	2358.26	2575.56	1598.11	2485.11	2107.41	1889.68	2430.81	1952.49	2002.59	0.0814474	0.000346815	-0.208983	0.0497454	-0.126661	-0.256465	-0.0153707	-0.124679	-0.0475643	-0.0457481	-0.207428	-0.274031	-0.144639	-0.127372	-0.294754	0.0734061	0.0766176	0.0714606	0.0649526	0.0740833	0.101968	0.057511	0.0655184	0.0978691	0.0684041	0.0661098	0.0640081	0.055096	0.0963484	0.0923289	1.10955
ENSG00000200344	AL034417.1	misc_RNA	human	0.2994	0.344826	0.482746	0.319341	0.333798	0.450501	0	0	0.318907	0	0.21295	0.186253	0	0.167366	0.161583	-1.58516	-1.98473	-0.42547	-1.7729	-1.88843	-0.487285	NA	NA	-0.0655588	NA	1.55757	1.17731	NA	1.3971	1.29502	3.78133	3.6193	2.96442	3.71188	3.60209	3.09015	NA	NA	3.40107	NA	4.08047	4.08047	NA	4.08047	4.08047	-0.419206
ENSG00000284747	AL034417.5	lncRNA	human	21.7027	42.8664	24.802	28.5062	36.7963	24.8163	25.3906	55.9653	24.4179	38.5205	40.5463	21.9731	40.4988	35.3726	28.0059	-0.097366	1.22375	0.450819	0.472347	0.975351	0.400841	0.585396	-0.242635	-0.0492383	1.34965	-0.765112	0.563898	0.528976	-0.563583	-0.0584752	0.445636	0.33801	0.431781	0.406399	0.358408	0.456692	0.395949	0.268188	0.433298	0.3288	0.325436	0.423783	0.32293	0.366346	0.413509	-0.218487
ENSG00000284716	AL034417.4	lncRNA	human	1.25984	1.74442	1.50501	0.964657	1.28455	1.62871	0.664753	1.38754	1.49484	1.36139	1.61203	1.18443	0.624533	1.33104	1.04915	-0.498089	0.0479608	0.190991	-2.12601	-0.8129	0.375632	-1.60503	-0.861988	0.182216	0.582844	0.140994	0.713057	1.3268	1.19392	2.51373	1.70788	1.42413	1.59624	2.06625	1.69333	1.54267	2.42149	1.64618	1.66404	1.62983	1.5423	1.8418	2.49282	1.76695	2.13757	-0.291641
ENSG00000116285	ERRFI1	protein_coding	human	4053.35	3226.05	3187.08	4280.98	3266.8	3119.28	4707.68	2910.59	2784.65	3767.87	2904.54	3589.5	3990.41	2852.33	3732.89	0.574664	-0.465191	0.127584	0.548479	-0.31251	0.00502966	-0.00928091	0.154121	-0.122669	-1.00417	0.594259	-0.430433	-0.829517	0.319793	-0.532447	0.0506318	0.0638211	0.0523337	0.0479706	0.0584368	0.0681389	0.0409537	0.0639406	0.0665616	0.058722	0.0599671	0.046688	0.0499435	0.0699407	0.0625867	11.3499
ENSG00000238290	AL034417.3	lncRNA	human	3.45369	3.98541	3.14466	3.9161	4.92472	3.19046	1.6187	2.83227	0.999457	1.52285	1.33379	1.14635	2.85472	2.21916	1.424	-1.92192	-2.14809	-2.13074	-1.53541	-0.663615	-2.19752	0.400822	1.42114	-0.0646405	-0.0786753	-0.10501	-0.188081	0.893543	-1.51822	-0.641477	1.13095	1.13964	1.22797	1.0592	0.879867	1.23812	1.52658	1.29856	1.81898	1.61699	1.74618	1.70576	1.21486	1.38708	1.6761	-1.69938
ENSG00000232848	AL034417.2	processed_pseudogene	human	0.373198	0	0.180185	0	0	0.211506	0.362084	0	0.338025	0.386548	0.18866	0.482194	0	0.21503	0.207607	2.14914	NA	1.41939	NA	NA	1.35433	-2.05774	NA	-0.0655585	-2.24887	1.55757	-0.708932	NA	1.3971	1.29502	3.20414	NA	4.08047	NA	NA	4.08047	3.16541	NA	3.33172	3.08678	4.08047	2.73283	NA	4.08047	4.08047	0.670738
ENSG00000229305	AL358876.1	processed_pseudogene	human	0	0	0	0	0	0.211506	0	0	0.181205	0	0	0	0	0.21503	0.207607	NA	NA	NA	NA	NA	1.35433	NA	NA	0.896211	NA	NA	NA	NA	1.3971	1.29502	NA	NA	NA	NA	NA	4.08047	NA	NA	4.08047	NA	NA	NA	NA	4.08047	4.08047	NA
ENSG00000227634	LINC01714	lncRNA	human	1.64679	1.56977	1.0304	1.63772	1.2225	1.47655	0.956271	0.311565	0.362411	0.84807	0.262042	0.463042	0.462547	0.43006	0.816057	-1.00022	-2.07748	-3.25124	-1.27031	-3.74608	-1.38187	-0.264016	-1.6747	1.92511	-1.0393	-1.17722	-2.22899	-2.39991	2.42144	-0.0352713	1.52651	1.70705	2.07743	1.66146	1.9736	1.79004	1.99194	3.41038	3.46819	2.0308	3.63044	2.68996	3.14696	3.28789	2.45876	-0.65523
ENSG00000200975	RNU1-7P	snRNA	human	0	0	0	0	0	0	0	0	0	0	0	0	0	0	0	NA	NA	NA	NA	NA	NA	NA	NA	NA	NA	NA	NA	NA	NA	NA	NA	NA	NA	NA	NA	NA	NA	NA	NA	NA	NA	NA	NA	NA	NA	NA
ENSG00000233645	AL358876.2	lncRNA	human	0	0	0	0	0	0	0	0	0	0	0	0	0	0	0	NA	NA	NA	NA	NA	NA	NA	NA	NA	NA	NA	NA	NA	NA	NA	NA	NA	NA	NA	NA	NA	NA	NA	NA	NA	NA	NA	NA	NA	NA	NA
ENSG00000251977	RNU6-991P	snRNA	human	0	0	0	0	0	0	0	0	0	0	0	0	0	0	0	NA	NA	NA	NA	NA	NA	NA	NA	NA	NA	NA	NA	NA	NA	NA	NA	NA	NA	NA	NA	NA	NA	NA	NA	NA	NA	NA	NA	NA	NA	NA
ENSG00000162426	SLC45A1	protein_coding	human	140.357	155.426	139.732	148.794	151.245	150.28	91.7857	99.7603	98.3298	94.0917	96.9119	88.7273	96.9233	103.85	102.849	-0.976503	-1.12916	-0.726446	-1.00398	-1.10799	-0.540559	-0.0102798	0.0224723	0.184677	-0.118936	0.406032	0.267523	-0.073549	0.571325	0.474173	0.183014	0.164735	0.174377	0.164994	0.169217	0.177662	0.210129	0.198219	0.210332	0.210383	0.201861	0.221303	0.198555	0.20735	0.203576	-5.33567
ENSG00000252254	AL356072.1	misc_RNA	human	0.169606	0.286315	0.158492	0.876774	0.187804	0.978719	0.641776	0.0939515	0.696052	0.085237	0.0788701	0	0.698791	0.828055	1.40088	-0.703018	-0.193035	-0.50416	1.99053	-1.00226	2.36587	2.7121	-0.806158	2.87452	0.54332	-0.30784	NA	-2.96338	3.37478	0.376932	4.08047	3.60511	4.08047	2.15307	4.08047	2.21284	2.38445	4.07175	2.49437	4.07162	4.07171	NA	2.34937	2.38142	1.66477	-0.172288
ENSG00000142599	RERE	protein_coding	human	2156.69	2621.07	2226.95	2284.73	2471.03	2313.95	1919.87	2533.14	2010.24	2208.12	2283.08	1882.02	2198.03	2233.91	2069.02	-0.242549	-0.0685114	0.0532437	-0.266274	-0.147544	0.097994	-0.00614049	-0.0779551	0.0441235	0.210171	0.122909	0.312582	0.149828	0.247672	0.374348	0.0619661	0.0610815	0.062781	0.0566151	0.0619405	0.0753433	0.0543477	0.0557181	0.0741386	0.059025	0.0595906	0.061235	0.0537592	0.0718699	0.069141	-3.91423
ENSG00000232912	RERE-AS1	lncRNA	human	0	0.998098	0	0.325516	0.147916	0.376619	0.300881	1.17026	0.322484	0.922857	0.852555	0	0.473169	0.511395	0.651991	NA	3.38366	NA	1.87838	0.921293	2.23649	1.63829	-2.46232	1.78241	3.16	-2.92422	NA	-0.932389	1.31931	0.361942	NA	2.10036	NA	3.38925	4.08047	3.25941	3.3856	1.93328	3.34019	2.08787	2.16779	NA	2.76776	2.72456	2.3959	NA
ENSG00000221083	AL096855.1	snoRNA	human	0.822298	0.731767	0.599995	0.65065	0.682883	0.428081	0.521055	0.410264	0.15682	0.584725	0.371833	0.482194	0.353525	0.159376	0.149187	-0.289436	-1.52826	-1.00966	-1.39726	-1.51246	-2.03184	-1.09216	0.00170054	-1.02734	-1.20501	0.496291	-0.708932	-0.0792794	-0.526457	-0.628535	2.2952	2.57813	2.73267	2.67317	2.60442	3.34911	2.65713	3.1344	4.08047	2.55745	3.23612	2.73283	3.28368	4.08047	4.08047	-0.126105
ENSG00000270282	AL096855.2	processed_pseudogene	human	0	0	0	0	0	0	0	0	0	0	0	0	0	0	0	NA	NA	NA	NA	NA	NA	NA	NA	NA	NA	NA	NA	NA	NA	NA	NA	NA	NA	NA	NA	NA	NA	NA	NA	NA	NA	NA	NA	NA	NA	NA
ENSG00000234619	RPL7P11	processed_pseudogene	human	0.1497	0.172413	0.139937	0.15967	0.166899	0.142694	0	0	0	0	0	0	0	0	0	-0.703018	-1.09864	-0.50416	-0.89183	-1.00226	-0.569223	NA	NA	NA	NA	NA	NA	NA	NA	NA	4.08047	4.08047	4.08047	4.08047	4.08047	4.08047	NA	NA	NA	NA	NA	NA	NA	NA	NA	-0.172288
ENSG00000224315	RPL7P7	processed_pseudogene	human	1.67684	2.08449	1.98957	1.89243	1.28648	2.74756	2.17838	2.04174	3.07911	2.37956	2.66809	2.20713	1.8408	2.71772	3.18214	0.816089	1.03203	1.2989	0.911633	-0.119822	1.87968	0.10492	-1.13992	0.581923	0.258722	0.260491	0.49576	-0.99036	1.98059	0.982413	1.51385	1.47777	1.51162	1.46949	1.7649	1.29236	1.28317	1.48508	1.15836	1.27308	1.30132	1.33621	1.47837	1.29186	1.12629	0.539083
ENSG00000222511	AL357552.1	misc_RNA	human	1.06817	1.66045	1.66396	1.11083	3.01853	1.49073	0.649687	3.16653	1.54645	1.12575	1.74522	1.20274	2.52049	2.7386	1.07862	-1.05063	-0.150603	0.514164	-1.2068	1.44009	0.162822	-0.137124	1.69002	-0.356863	0.960811	0.687231	1.58536	2.69362	-1.30033	1.39108	1.96228	1.64154	1.52931	1.94825	1.18732	1.70838	2.33556	1.21811	1.58927	1.93856	1.54214	1.81559	1.4592	1.27156	2.01162	-0.535413
ENSG00000226545	AL357552.2	unprocessed_pseudogene	human	0	0	0	0	0	0	0	0	0	0	0	0	0	0	0	NA	NA	NA	NA	NA	NA	NA	NA	NA	NA	NA	NA	NA	NA	NA	NA	NA	NA	NA	NA	NA	NA	NA	NA	NA	NA	NA	NA	NA	NA	NA
ENSG00000228423	AL357552.3	lncRNA	human	0.812522	1.56368	1.74266	2.18666	0.842726	1.38906	1.6072	1.04604	1.70197	1.00366	1.9629	1.24378	1.69866	0.952902	2.11031	-1.64762	0.373695	1.03738	1.23675	-1.9448	0.435012	2.89611	-2.29782	-0.610604	2.03549	0.64397	2.69745	-3.14723	2.38765	-0.800738	2.2926	1.62805	1.4849	1.3563	2.25865	1.76641	1.73421	2.0933	1.49775	2.08461	1.3753	1.88316	1.72727	2.2125	1.39084	-0.718668
ENSG00000229716	RPL23AP19	processed_pseudogene	human	0	0	0	0	0	0	0	0	0	0	0	0	0	0	0	NA	NA	NA	NA	NA	NA	NA	NA	NA	NA	NA	NA	NA	NA	NA	NA	NA	NA	NA	NA	NA	NA	NA	NA	NA	NA	NA	NA	NA	NA	NA
ENSG00000074800	ENO1	protein_coding	human	54687	58801.8	44009.8	58570	56437.2	46505.5	58077.5	60395.9	37066.1	58330	47093.9	43957.9	59984.2	47602.3	49505.4	0.233903	0.0530365	-0.197545	0.242439	0.0289717	-0.0965771	0.0254207	-0.0225782	0.100335	-0.144924	-0.249285	-0.414617	-0.182105	-0.12358	-0.32844	0.0520983	0.0652533	0.0618652	0.0497524	0.0572737	0.0660226	0.0291689	0.0516511	0.0651077	0.0510275	0.0610865	0.0490625	0.0336747	0.0535047	0.0500443	4.48965
ENSG00000274258	MIR6728	miRNA	human	2.76461	2.87641	1.899	3.05108	2.04768	2.43489	2.80374	1.85284	1.48403	2.62888	1.73999	1.73529	2.09022	1.5789	2.45939	0.0341671	-0.2788	-1.11273	0.0872806	-1.61387	-0.225834	0.0676575	-1.32434	0.878625	-0.281121	-0.826248	-1.11944	-1.66917	1.3791	-0.302794	1.20255	1.12276	1.47114	1.10926	1.43806	1.2369	1.19103	1.47854	1.60537	1.20148	1.49962	1.59281	1.44054	1.59271	1.24039	0.0284123
ENSG00000230679	ENO1-AS1	lncRNA	human	5.47135	8.08777	5.5782	6.5027	6.64961	4.43004	6.96322	10.0108	5.00695	8.47521	8.38616	5.95972	8.25869	5.96124	5.81844	0.53492	1.12128	0.737323	0.77795	0.735599	0.0921728	0.258915	-0.396028	-0.645891	0.626995	-0.384911	0.217421	-0.0135028	-0.641729	-0.676842	0.859462	0.740805	0.925147	0.810468	0.79842	0.965253	0.714094	0.614109	0.908933	0.651909	0.716294	0.823472	0.672638	0.800218	0.812062	0.622389
ENSG00000201725	RNU6-304P	snRNA	human	0.339211	0.388031	0.316984	0.669583	0.701074	0.323916	0.283822	0.339238	0	0	0	0	0.6276	0.281761	0.267228	-1.73689	-2.12574	-1.53815	-0.143807	-0.155945	-1.60324	1.56589	1.93886	NA	NA	NA	NA	0.0112146	-1.4084	-1.40283	3.60213	3.45813	3.70293	2.64704	2.5777	3.74826	3.76555	3.58241	NA	NA	NA	NA	2.66581	3.87086	4.00835	-0.482184
ENSG00000238249	HMGN2P17	processed_pseudogene	human	0.684571	0.680172	0.722729	0.700877	0.375609	0.323916	0.649687	0.297285	0.355258	0.629081	0.6755	0.666312	0.339958	0	0.294212	0.104485	-0.332735	0.386679	-0.0415641	-2.02912	-1.60324	-0.137124	-1.67488	-1.97742	-0.408975	0.725619	0.298217	-1.93194	NA	-1.52096	2.46203	2.49279	2.56645	2.45634	3.44246	3.74826	2.33556	3.46882	3.4947	2.35841	2.46379	2.44808	3.28034	NA	3.53886	0.0424387
ENSG00000232208	AL139415.1	processed_pseudogene	human	11.5482	12.3383	9.24931	11.501	13.3908	10.631	12.1326	15.01	9.03618	12.9663	10.5015	9.83066	13.9807	12.8139	11.1313	0.413792	0.224083	-0.00720131	0.21538	0.508148	0.305331	-0.182735	0.282855	0.314593	-0.154772	-0.228701	-0.403006	0.324658	-0.199961	0.101117	0.57491	0.547064	0.669448	0.575577	0.533357	0.594449	0.564374	0.503181	0.674905	0.534455	0.630904	0.660406	0.530991	0.549057	0.591104	0.719751
ENSG00000232663	AL139415.2	processed_pseudogene	human	0	0	0	0	0	0	0	0	0	0	0	0	0	0	0	NA	NA	NA	NA	NA	NA	NA	NA	NA	NA	NA	NA	NA	NA	NA	NA	NA	NA	NA	NA	NA	NA	NA	NA	NA	NA	NA	NA	NA	NA	NA
ENSG00000131686	CA6	protein_coding	human	0.339211	0.817088	0.316984	0.361827	0.557795	0.323916	0	0.627877	0	0.396355	0.366345	0	0.180468	0.159376	0	-1.73689	0.0725372	-1.53815	-1.9236	-1.05255	-1.60324	NA	-1.12807	NA	1.86905	-1.64131	NA	0.88249	-0.526457	NA	3.60213	2.49317	3.70293	3.5363	2.8071	3.74826	NA	2.71059	NA	3.313	3.47926	NA	4.08047	4.08047	NA	-0.482184
ENSG00000265141	RN7SL451P	misc_RNA	human	0	0	0	0	0	0	0	0	0	0	0	0	0	0	0	NA	NA	NA	NA	NA	NA	NA	NA	NA	NA	NA	NA	NA	NA	NA	NA	NA	NA	NA	NA	NA	NA	NA	NA	NA	NA	NA	NA	NA	NA	NA
ENSG00000197241	SLC2A7	protein_coding	human	0.625767	1.00982	0.966888	0.839517	1.15327	0.809624	0.15897	0.778686	0.513729	0.270791	0.650197	0.351019	0.624533	0.613908	0.356795	-2.63504	-1.25968	-0.587722	-1.85831	-0.540689	-1.53612	0.789963	0.70575	-0.939677	1.4129	0.668209	2.05142	1.3268	-0.970317	0.333252	2.45166	1.95104	1.95397	2.1778	1.78096	2.2215	4.08047	2.19676	2.69592	3.51678	2.36847	3.2191	2.49282	2.52617	3.34381	-1.0748
ENSG00000142583	SLC2A5	protein_coding	human	2.09227	2.45384	2.23052	1.82566	2.47829	2.50994	1.02841	1.89142	1.8404	1.55513	1.73865	1.4763	1.29632	2.03858	1.47586	-0.927725	-0.835332	-0.42401	-2.08061	-0.658307	-0.163253	-1.12637	0.173576	0.268268	0.12856	0.41138	0.518949	1.43916	0.503898	1.93248	1.35859	1.30108	1.34571	1.61383	1.22849	1.25155	1.88828	1.41545	1.44214	1.53485	1.53931	1.58087	1.75153	1.33687	1.72954	-0.682859
ENSG00000252404	AL158048.1	scaRNA	human	0	0	0	0	0	0	0	0	0	0	0	0	0	0	0	NA	NA	NA	NA	NA	NA	NA	NA	NA	NA	NA	NA	NA	NA	NA	NA	NA	NA	NA	NA	NA	NA	NA	NA	NA	NA	NA	NA	NA	NA	NA
ENSG00000180758	GPR157	protein_coding	human	370.454	526.705	436.918	404.124	482.226	434.295	339.399	572.364	423.281	448.903	513.479	372.269	445.052	470.281	400.421	-0.25291	0.355965	0.400074	-0.187458	0.208842	0.326589	0.082429	-0.146131	-0.0741812	0.645097	0.0451868	0.669876	0.427786	0.119944	0.524783	0.110898	0.100489	0.103284	0.11494	0.100025	0.111288	0.118005	0.0932196	0.10771	0.10331	0.0971712	0.107094	0.108011	0.104207	0.11979	-2.28056
ENSG00000228526	MIR34AHG	lncRNA	human	380.979	446.926	366.638	466.952	462.519	374.358	332.549	381.161	248.007	305.448	296.262	250.96	405.637	318.018	324.833	-0.76152	-0.666174	-0.653528	-0.279	-0.441516	-0.662007	0.498944	0.224086	-0.00925732	0.130295	0.0145744	0.124391	-0.134995	-0.216156	-0.373466	0.242184	0.145554	0.153106	0.125632	0.235367	0.157389	0.130229	0.147209	0.163672	0.151838	0.153307	0.161555	0.126408	0.158058	0.132924	-3.14438
ENSG00000284357	MIR34A	miRNA	human	0	0	0	0	0	0	0	0	0	0	0	0	0	0	0	NA	NA	NA	NA	NA	NA	NA	NA	NA	NA	NA	NA	NA	NA	NA	NA	NA	NA	NA	NA	NA	NA	NA	NA	NA	NA	NA	NA	NA	NA	NA
ENSG00000234546	LNCTAM34A	lncRNA	human	34.7212	39.9785	33.9914	38.0987	39.2727	32.5668	27.7355	32.7932	23.0779	28.8029	28.5211	24.7618	31.3661	26.4403	25.7033	-0.630798	-0.587995	-0.462221	-0.524514	-0.564582	-0.714603	0.124091	0.0248612	-0.251187	0.0768858	0.129035	0.184982	-0.00895912	-0.148307	-0.178427	0.350479	0.337046	0.352823	0.333941	0.326314	0.38175	0.359992	0.344127	0.410636	0.362717	0.368657	0.38205	0.340304	0.388664	0.397335	-1.79982
ENSG00000049239	H6PD	protein_coding	human	1126.37	1265.95	1016.51	1217.82	1208.88	1064.32	1095.46	1216.03	857.273	1132.89	1020.73	909.311	1169.76	1018.68	1027.52	-0.0596026	-0.124793	-0.167062	-0.0218286	-0.163946	-0.0946001	0.0551547	-0.0374161	0.0708811	-0.0294277	-0.0408138	-0.0906423	-0.110862	0.0706754	-0.0631719	0.0764628	0.0766293	0.0780588	0.0755971	0.0793357	0.0970037	0.0704249	0.0724682	0.0934267	0.0706704	0.0724687	0.0734421	0.0737354	0.0940124	0.091521	-0.779498
ENSG00000171621	SPSB1	protein_coding	human	1360.98	1510.54	1125.07	1330.48	1428.34	1091.84	1504.9	1787.05	1039.87	1684.9	1420.89	1275.75	1584.47	1313.94	1225.63	0.625538	0.541964	0.319492	0.409953	0.486075	0.181648	-0.198626	-0.0547797	-0.138289	-0.0483942	-0.221045	-0.289267	0.107123	-0.302414	-0.217837	0.0660488	0.0779491	0.070909	0.0673877	0.0782906	0.0821973	0.0589828	0.078462	0.0799303	0.0702484	0.074912	0.0637582	0.0710541	0.0855749	0.077165	9.47084
ENSG00000284652	BX323043.1	lncRNA	human	0.173599	0	0.201532	0	0.182186	0.211506	0.168875	0.19265	0.356909	0.180183	0.211936	0.333602	0.180468	0.374406	0.207607	1.22054	NA	1.41939	NA	0.921293	1.35433	-1.13359	1.0595	-0.0655582	-1.32153	1.55757	0.21554	0.88249	0.435332	1.29502	4.08047	NA	4.08047	NA	4.08047	4.08047	4.08047	4.08047	3.26898	4.08047	4.08047	3.32746	4.08047	3.24891	4.08047	0.299116
ENSG00000284693	LINC02606	lncRNA	human	3.77423	4.43783	3.12071	4.55586	4.23952	4.44093	3.7872	4.10085	3.10442	3.63903	2.9732	2.50834	4.23122	4.15167	4.40599	-0.33293	-0.16827	-0.746298	0.066164	-0.266019	0.289475	0.41579	-0.095396	1.036	0.195288	-0.564983	-0.399734	-0.300087	0.558318	0.234424	1.00385	0.92172	1.09682	0.940665	0.925287	0.918604	1.02541	0.943855	1.0879	1.00537	1.11447	1.19683	0.960477	0.933833	0.953003	-0.331655
ENSG00000252956	RNA5SP40	rRNA_pseudogene	human	0	0	0	0	0	0	0	0	0	0	0	0	0	0	0	NA	NA	NA	NA	NA	NA	NA	NA	NA	NA	NA	NA	NA	NA	NA	NA	NA	NA	NA	NA	NA	NA	NA	NA	NA	NA	NA	NA	NA	NA	NA
ENSG00000235263	AL928921.1	lncRNA	human	0	0	0	0	0	0	0	0	0	0	0	0	0	0	0	NA	NA	NA	NA	NA	NA	NA	NA	NA	NA	NA	NA	NA	NA	NA	NA	NA	NA	NA	NA	NA	NA	NA	NA	NA	NA	NA	NA	NA	NA	NA
ENSG00000171612	SLC25A33	protein_coding	human	143.819	155.396	126.483	156.048	135.891	120.574	175.645	171.662	122.976	176.714	156.91	143.863	170.808	133.427	150.313	0.673488	0.52501	0.530165	0.717921	0.273249	0.358651	0.0626236	-0.250054	-0.171661	-0.111724	0.00631053	-0.126602	-0.413291	0.0872776	-0.347794	0.175842	0.162969	0.177284	0.163876	0.172349	0.188146	0.159481	0.156562	0.185289	0.158662	0.161264	0.174344	0.158022	0.18139	0.174268	3.83007
ENSG00000231181	AL954705.1	processed_pseudogene	human	4.57121	5.7627	5.57184	5.60424	6.91747	4.91283	4.87851	7.46028	5.09559	4.985	6.01363	4.86072	7.18611	6.30087	5.15185	-0.167558	0.0753846	0.545146	0.228002	0.654674	0.173773	0.408289	0.582116	-0.368744	0.281847	0.474032	0.729027	0.454929	-0.472966	-0.0409115	0.946249	0.826391	0.819217	0.814113	0.759393	0.882905	0.894293	0.738854	0.841386	0.904376	0.79381	0.90548	0.729179	0.792003	0.846506	-0.177076
ENSG00000188807	TMEM201	protein_coding	human	1159.31	1209.7	860.05	1309.57	1113.5	886.977	1543.43	1453.42	845.596	1469.87	1140.46	1082.63	1534.38	1083.5	1248.8	0.896004	0.675693	0.34254	1.01962	0.557728	0.364602	0.140469	-0.116446	0.0211766	-0.185058	-0.331811	-0.536736	-0.43071	-0.190919	-0.644593	0.0702514	0.0776701	0.0817267	0.0671144	0.075459	0.0922385	0.0565164	0.0699828	0.0929419	0.0671172	0.0781067	0.0713146	0.0616043	0.0860973	0.0799342	12.7543
ENSG00000171608	PIK3CD	protein_coding	human	428.938	635.711	409.403	457.059	573.692	422.526	473.334	812.588	412.66	640.356	605.905	421.221	619.41	565.697	461.584	0.371726	0.974955	0.422976	0.36605	0.816268	0.447231	0.0112277	-0.157752	0.0235782	0.639028	-0.550695	0.0681272	0.480698	-0.366233	0.0916252	0.105933	0.0974689	0.104889	0.103683	0.111015	0.109835	0.102463	0.101962	0.109107	0.096485	0.0971764	0.105237	0.107695	0.115067	0.108718	3.50906
ENSG00000179840	PIK3CD-AS1	lncRNA	human	0	0	0	0	0	0	0	0	0	0	0	0	0	0	0	NA	NA	NA	NA	NA	NA	NA	NA	NA	NA	NA	NA	NA	NA	NA	NA	NA	NA	NA	NA	NA	NA	NA	NA	NA	NA	NA	NA	NA	NA	NA
ENSG00000233268	AL691449.1	processed_pseudogene	human	0	0	0	0	0	0	0	0	0	0	0	0	0	0	0	NA	NA	NA	NA	NA	NA	NA	NA	NA	NA	NA	NA	NA	NA	NA	NA	NA	NA	NA	NA	NA	NA	NA	NA	NA	NA	NA	NA	NA	NA	NA
ENSG00000231789	PIK3CD-AS2	lncRNA	human	54.023	62.5753	57.7623	55.8307	56.6173	62.2294	32.1413	37.2825	43.5234	36.7562	41.9491	36.1708	32.2266	41.1887	40.8632	-1.09233	-1.04566	-0.556768	-1.23379	-1.3842	-0.371151	-0.125775	-0.33453	0.18374	0.0815231	0.490636	0.551854	-0.114483	1.01228	0.872536	0.281556	0.26728	0.266083	0.285467	0.286971	0.262753	0.347628	0.339067	0.296373	0.32501	0.307421	0.32175	0.36216	0.323879	0.323468	-3.87961
ENSG00000171603	CLSTN1	protein_coding	human	4418.14	5066.86	4183.5	4737.16	4866.24	4356.53	4302.98	5054.27	3725.12	4583.29	4339.32	3784.67	4718.08	4330.86	4214.64	-0.0294772	-0.0334112	0.00572257	-0.0167404	-0.0560058	0.0585684	0.0299053	-0.021032	0.0518503	0.031873	0.0403973	0.051899	-0.00794056	0.116396	0.0854411	0.053538	0.0572705	0.0568121	0.0509313	0.0572165	0.0717012	0.0401902	0.0469888	0.0668769	0.0463906	0.0504266	0.0478096	0.0432354	0.0652674	0.061497	-0.550584
ENSG00000271264	MZT1P1	processed_pseudogene	human	0	0	0	0	0	0.211506	0	0	0.181205	0	0	0	0	0.21503	0.207607	NA	NA	NA	NA	NA	1.35433	NA	NA	0.896211	NA	NA	NA	NA	1.3971	1.29502	NA	NA	NA	NA	NA	4.08047	NA	NA	4.08047	NA	NA	NA	NA	4.08047	4.08047	NA
ENSG00000280113	AL357140.3	TEC	human	0	0.214529	0	0	0	0.361988	0	0.217613	0.308099	0.198177	0.183172	0	0	0.366363	0.352416	NA	0.941774	NA	NA	NA	2.19249	NA	-0.980163	1.73095	0.720002	-0.482655	NA	NA	2.23423	2.12988	NA	4.06594	NA	NA	NA	3.30694	NA	4.06602	3.39699	4.06582	4.06596	NA	NA	3.22478	3.311	NA
ENSG00000178585	CTNNBIP1	protein_coding	human	155.67	180.687	135.604	163.927	177.208	149.243	148.442	185.873	116.971	163.079	141.942	122.142	168.466	152.893	141.359	-0.0352395	-0.00453633	-0.252081	-0.0785193	0.0340557	-0.0349968	-0.0263732	0.0396573	0.21731	0.0665259	-0.24634	-0.200201	0.143723	-0.0665569	0.0539186	0.158872	0.154899	0.169178	0.153567	0.149462	0.174169	0.158353	0.151595	0.18892	0.159362	0.171149	0.175639	0.150849	0.170708	0.175595	-0.22181
ENSG00000223989	AL357140.1	lncRNA	human	0	0	0	0	0	0	0	0	0	0	0	0	0	0	0	NA	NA	NA	NA	NA	NA	NA	NA	NA	NA	NA	NA	NA	NA	NA	NA	NA	NA	NA	NA	NA	NA	NA	NA	NA	NA	NA	NA	NA	NA	NA
ENSG00000285701	AL357140.4	lncRNA	human	0	0	0	0	0	0	0	0	0	0	0	0	0	0	0	NA	NA	NA	NA	NA	NA	NA	NA	NA	NA	NA	NA	NA	NA	NA	NA	NA	NA	NA	NA	NA	NA	NA	NA	NA	NA	NA	NA	NA	NA	NA
ENSG00000162441	LZIC	protein_coding	human	968.18	1039.01	835.302	1002.27	1005.64	849.038	1025.13	1108.44	751.241	1061.81	919.863	854.996	1065.51	902.999	898.936	0.322838	0.139151	0.104644	0.240972	0.142089	0.089169	-0.0651479	0.00461747	-0.0159252	-0.148478	-0.0330997	-0.201698	-0.0676201	-0.0505479	-0.141144	0.074778	0.0780002	0.0800271	0.0745217	0.0780438	0.089612	0.0671475	0.0709067	0.0888544	0.0701818	0.0754467	0.0731241	0.0698366	0.0847329	0.0842472	4.31728
ENSG00000228150	AL357140.2	lncRNA	human	6.19742	9.00359	5.58808	6.92955	7.87424	5.64289	5.34255	8.9778	3.79354	7.16002	6.45857	4.21883	6.88244	5.56943	4.80013	-0.5001	0.193188	-0.637693	-0.33616	-0.0524374	-0.639722	0.1826	-0.244324	-0.012978	0.733719	-0.839133	-0.121081	0.313024	-0.582014	-0.295094	0.774614	0.652088	0.859281	0.728073	0.674834	0.835331	0.820145	0.651025	1.02841	0.734236	0.824558	0.967574	0.727358	0.832559	0.894894	-0.645612
ENSG00000173614	NMNAT1	protein_coding	human	95.4784	135.544	96.6184	100.033	130.365	102.235	74.4466	142.639	79.1603	105.589	106.11	73.1906	106.307	107.52	81.3762	-0.538877	0.110923	-0.279654	-0.606711	0.101033	-0.17053	-0.0511101	-0.00791005	0.108417	0.686336	-0.390448	0.276553	0.73876	-0.269666	0.446919	0.203818	0.178669	0.204833	0.201299	0.173391	0.201054	0.223661	0.169211	0.221852	0.196605	0.199951	0.227663	0.191709	0.191343	0.221637	-2.64391
ENSG00000202415	RN7SKP269	misc_RNA	human	6.99864	9.49895	9.0335	8.18197	8.92213	10.6869	4.92075	7.77516	9.12548	5.92065	8.13136	6.0036	6.55999	9.25889	8.55826	-1.15064	-0.465476	-0.00390635	-0.761049	-0.584874	0.37986	0.404832	-0.117012	0.38282	0.7163	0.465235	1.16502	0.206666	0.968545	1.15289	0.758884	0.62434	0.646756	0.675235	0.637528	0.619366	0.854755	0.677418	0.66529	0.792603	0.677218	0.811271	0.731411	0.659689	0.69611	-1.51622
ENSG00000283611	TMEM274P	unitary_pseudogene	human	0	0	0	0	0	0.211506	0	0	0.181205	0	0	0	0	0.21503	0.207607	NA	NA	NA	NA	NA	1.35433	NA	NA	0.896211	NA	NA	NA	NA	1.3971	1.29502	NA	NA	NA	NA	NA	4.08047	NA	NA	4.08047	NA	NA	NA	NA	4.08047	4.08047	NA
ENSG00000265521	MIR5697	miRNA	human	0	0.998653	0.180185	0	0.636114	0.165113	0	1.68027	0.298098	0.925313	1.04176	0.165187	0.624782	0.719006	0.161583	NA	3.35208	1.41939	NA	2.78331	1.35433	NA	-0.544711	-0.0655592	3.1302	-1.92659	1.17731	2.73997	-1.42353	1.29502	NA	2.11964	4.08047	NA	2.59919	4.08047	NA	1.53496	3.48432	2.10615	2.00544	4.08047	2.60318	2.39342	4.08047	NA
ENSG00000241326	AL603962.1	lncRNA	human	0	0	0	0	0	0	0	0	0	0	0	0	0	0	0	NA	NA	NA	NA	NA	NA	NA	NA	NA	NA	NA	NA	NA	NA	NA	NA	NA	NA	NA	NA	NA	NA	NA	NA	NA	NA	NA	NA	NA	NA	NA
ENSG00000162444	RBP7	protein_coding	human	11.8817	15.0301	14.1956	12.7848	13.7736	12.5548	8.38902	11.9118	10.62	10.1718	12.7293	10.067	9.84997	9.91277	9.13419	-0.866836	-0.426531	-0.0137286	-0.830678	-0.697387	-0.456589	0.0530715	-0.260091	-0.443393	0.461384	0.422403	0.865512	0.165843	0.237528	0.378855	0.576513	0.519696	0.534707	0.549366	0.519883	0.575605	0.66189	0.576134	0.634331	0.624253	0.582732	0.639837	0.609465	0.631454	0.665156	-1.50358
ENSG00000130939	UBE4B	protein_coding	human	1909.88	2044.35	1734.14	2004.49	1957.09	1760.19	1828.59	1892.38	1447.45	1855.26	1681.55	1575.11	1860.94	1628.06	1672.2	-0.0171761	-0.230259	-0.104685	-0.0668614	-0.263155	-0.125987	-0.0324335	-0.0310714	-0.0220038	-0.177765	0.126896	-0.0708194	-0.165171	0.139148	-0.0489549	0.0631753	0.0673727	0.0694382	0.0629513	0.0665249	0.0775069	0.0552078	0.0592787	0.0766065	0.0590647	0.0657763	0.0627419	0.0580584	0.071521	0.0708955	-0.271879
ENSG00000224340	AL590639.1	processed_pseudogene	human	0	0	0	0	0	0	0	0	0	0	0	0	0	0	0	NA	NA	NA	NA	NA	NA	NA	NA	NA	NA	NA	NA	NA	NA	NA	NA	NA	NA	NA	NA	NA	NA	NA	NA	NA	NA	NA	NA	NA	NA	NA
ENSG00000233623	PGAM1P11	processed_pseudogene	human	2.86338	3.39189	2.67691	3.27476	2.16995	2.67008	3.11677	2.51603	2.37471	3.21974	3.01022	2.54558	2.44776	1.93607	2.8981	0.104753	0.157208	0.107522	0.321245	-1.23795	0.0402003	0.237259	-1.39494	-0.0688791	0.0878771	-0.0504913	0.0201784	-1.52197	1.27821	-0.272167	1.16728	1.08865	1.22019	1.10047	1.36202	1.21709	1.07201	1.2607	1.2346	1.0573	1.12002	1.19733	1.26989	1.38839	1.13255	0.0897414
ENSG00000201746	RNU6-828P	snRNA	human	0.609856	1.9597	1.19291	0.836067	0.648723	0.810646	0.50977	1.65007	1.01757	1.52955	2.06935	0.870454	0.531169	0.538875	0.702863	-1.17801	1.42671	0.916668	-0.394061	-1.48042	-0.116469	0.81433	-2.92722	-1.04881	2.66813	-0.510966	2.12225	-1.06688	1.36607	0.274286	2.53279	1.61868	1.86404	2.27314	2.4748	2.32381	2.84505	1.9008	2.09816	1.90972	1.53569	2.23667	2.84021	2.85281	2.61538	-0.465102
ENSG00000054523	KIF1B	protein_coding	human	2734.04	3241	2621.6	2895.12	3067.72	2725.7	2858.97	3568.11	2550.76	3180.24	3040.19	2572.77	3193.24	2986.56	2824.17	0.217976	0.301914	0.284236	0.196373	0.243971	0.32808	-0.00385514	-0.0566422	0.043196	0.120131	-0.0163693	0.0832164	0.0785617	0.0863253	0.141918	0.0629947	0.0587746	0.060803	0.0554918	0.0610388	0.0695465	0.054325	0.0523377	0.0679145	0.0584745	0.0562907	0.0610314	0.052436	0.0656678	0.0633908	3.46023
ENSG00000264881	AL358013.1	miRNA	human	0.171761	0	0	0	0	0	0.168454	0	0	0.178107	0	0.146035	0	0	0	1.22054	NA	NA	NA	NA	NA	-1.13359	NA	NA	-1.32153	NA	-0.746246	NA	NA	NA	4.08047	NA	NA	NA	NA	NA	4.08047	NA	NA	4.08047	NA	4.08047	NA	NA	NA	0.299116
ENSG00000199562	RNU6-37P	snRNA	human	1.30268	2.07226	1.154	1.12255	1.38163	1.88882	1.15884	2.19163	1.66008	2.03673	1.83084	1.167	1.22217	1.98325	1.7261	0.277867	1.01114	0.109725	-0.333834	0.100496	1.22621	-0.595543	-0.935362	1.12356	0.770499	-0.917137	-0.155168	0.474175	1.14084	1.56799	1.69686	1.40574	1.87971	1.90244	1.86357	1.49855	1.75426	1.44076	1.55416	1.3254	1.47683	1.75704	1.95361	1.53659	1.56576	0.163754
ENSG00000264501	RN7SL731P	misc_RNA	human	0	0	0	0	0	0	0	0	0	0	0	0	0	0	0	NA	NA	NA	NA	NA	NA	NA	NA	NA	NA	NA	NA	NA	NA	NA	NA	NA	NA	NA	NA	NA	NA	NA	NA	NA	NA	NA	NA	NA	NA	NA
ENSG00000284735	AL139424.3	lncRNA	human	27.69	36.1931	32.0426	29.8662	37.8391	33.8006	14.4408	28.8145	23.3813	19.2634	24.4048	18.0025	22.9548	27.5756	20.8413	-1.49609	-0.883974	-0.559257	-1.44676	-0.581044	-0.450017	0.0670255	0.303335	0.108938	0.647459	0.326309	0.952404	0.894715	0.135608	1.0048	0.410292	0.351874	0.376551	0.402609	0.336982	0.377964	0.500696	0.35759	0.416216	0.434784	0.39648	0.459703	0.412699	0.379707	0.453753	-3.6464
ENSG00000284642	AL139424.2	lncRNA	human	2.10204	1.61511	1.83177	2.88206	1.52673	0.612459	3.78887	2.15454	1.3581	2.68982	2.38285	2.66884	3.3849	1.04437	2.22939	1.82497	1.0089	1.68203	2.27893	0.956997	-1.12017	0.465925	-0.0487099	-2.79416	-0.780723	0.674319	-0.127538	-1.28821	-2.07174	-3.37153	1.43289	1.66952	1.52406	1.29466	1.60361	2.57478	0.962448	1.36148	1.85871	1.20093	1.3039	1.15637	1.06826	2.00625	1.62601	1.27363
ENSG00000142657	PGD	protein_coding	human	31996.1	34949.9	30328.8	33671	34011.8	31358.8	26665.9	28877	23589.5	27391.9	26052.7	24027.2	27991.3	26235.5	26075.8	-0.391465	-0.564078	-0.347721	-0.439855	-0.544982	-0.310464	-0.031308	0.0205747	0.0366775	-0.136506	0.217557	0.0604408	-0.0736823	0.236365	0.139941	0.0531335	0.0587094	0.0539262	0.048541	0.0575463	0.0671108	0.0340895	0.0480079	0.0595625	0.047403	0.0475434	0.0426378	0.0387696	0.0596235	0.0539226	-7.36758
ENSG00000271989	AL139424.1	lncRNA	human	7.63694	8.92105	5.87556	10.396	9.53833	6.60401	5.99657	5.94784	1.57292	4.35279	2.73886	2.26316	7.6355	4.09211	4.99568	-1.49247	-1.34469	-3.15702	-0.449592	-0.93054	-2.06907	1.05712	0.423257	1.0192	0.167643	-1.77166	-1.63818	-0.448662	-1.14836	-1.61634	0.735247	0.670183	1.09618	0.616652	0.627794	0.884173	0.808774	0.77936	1.74715	0.893528	1.34161	1.42026	0.706422	1.02227	0.987104	-2.02989
ENSG00000251503	CENPS-CORT	protein_coding	human	0.735652	0.449377	0.308435	0.146382	0.152193	0.525258	0.579629	0.297285	0.490461	0.889887	0.43826	0.672897	0	0.397995	0.381667	1.84732	0.671499	0.457627	-0.89183	-1.00226	1.32709	-2.7221	-1.67488	0.861307	-1.13153	-0.212441	-1.37139	NA	2.33142	2.22444	2.55883	2.86803	3.48569	4.08047	4.08047	2.93257	2.86653	3.46882	2.91386	2.20663	2.84698	2.59183	NA	3.38501	3.48519	0.721939
ENSG00000175279	CENPS	protein_coding	human	66.2612	72.8835	55.4559	70.6836	65.4877	54.205	68.0517	69.3502	43.2559	69.9662	58.6145	53.3992	67.2565	50.9652	55.7113	0.144872	0.00241077	-0.183563	0.134671	-0.19395	-0.320725	0.0060442	-0.196635	-0.137296	-0.105067	-0.187742	-0.311294	-0.297943	-0.122179	-0.444695	0.254601	0.238367	0.270254	0.243709	0.254864	0.311447	0.257669	0.255428	0.343599	0.251019	0.269511	0.285964	0.261026	0.328929	0.317377	0.569016
ENSG00000241563	CORT	protein_coding	human	3.98641	4.11273	4.13336	4.42779	3.78994	3.89461	3.35755	2.67238	3.08457	2.99815	3.23677	3.16397	3.08234	2.6876	3.2633	-0.511587	-0.74146	-0.166161	-0.388896	-1.15237	-0.41728	0.138527	-0.359513	-0.250597	-0.209181	0.585347	0.361412	-0.733979	0.729553	-0.0226907	0.984764	1.08222	0.963802	0.953977	1.09247	1.06951	1.0386	1.36915	1.13285	1.18124	1.16191	1.05344	1.1776	1.32683	1.14368	-0.519502
ENSG00000160049	DFFA	protein_coding	human	2496.94	2563.34	2122.53	2602.69	2518.91	2214.67	2791.1	2818.21	2040.04	2771.17	2371.08	2290.25	2837.15	2418.63	2482.44	0.48034	0.188975	0.234537	0.420692	0.230954	0.288873	-0.0426882	0.0430273	0.053928	-0.255993	0.0470547	-0.229131	-0.158643	0.0602334	-0.12111	0.0553732	0.0653624	0.0583943	0.0549987	0.0664619	0.0687603	0.0470349	0.0644862	0.065992	0.0580565	0.0610051	0.0516607	0.0574012	0.0712066	0.0632171	8.67459
ENSG00000203469	AL354956.1	lncRNA	human	0	0	0.604597	0	0.478019	0.376619	0	0.504432	0.849595	0	0.635809	0.557497	0.472326	0.799769	0.36919	NA	NA	2.94213	NA	2.36899	2.23649	NA	2.51185	-0.695898	NA	3.08223	2.70431	2.33262	-0.134826	2.18154	NA	NA	2.89017	NA	2.87947	3.25941	NA	2.8276	2.2549	NA	2.81588	2.92074	2.87841	2.18238	3.25522	NA
ENSG00000142655	PEX14	protein_coding	human	427.392	489.405	402.746	464.501	462.913	401.452	426.38	485.067	345.301	447.348	421.441	368.14	459.741	396.2	397.825	-0.000918664	-0.0166013	0.0190202	0.0490121	-0.0761328	-0.0552613	0.0664694	-0.0562012	-0.075273	0.0186578	0.0372362	0.0363951	-0.0933167	0.022166	-0.0944298	0.108514	0.111039	0.114576	0.106433	0.107234	0.123587	0.098346	0.10021	0.122268	0.102454	0.109188	0.107671	0.0971236	0.114031	0.115277	-0.00846587
ENSG00000287727	AL139423.2	lncRNA	human	0	0	0	0	0	0	0	0	0	0	0	0	0	0	0	NA	NA	NA	NA	NA	NA	NA	NA	NA	NA	NA	NA	NA	NA	NA	NA	NA	NA	NA	NA	NA	NA	NA	NA	NA	NA	NA	NA	NA	NA	NA
ENSG00000243267	RN7SL614P	misc_RNA	human	0.968972	1.11154	2.15975	1.00267	1.03042	0.925189	0.310786	0.359224	1.37891	0.365736	1.65834	1.45028	0.300111	0.296364	0.295197	-2.01113	-2.35108	0.941306	-2.19929	-2.30769	-1.87776	-0.171807	-0.00248151	-2.81481	-0.260296	3.29934	2.96338	-0.0792802	0.435329	0.33325	2.07741	2.00467	1.40415	2.06857	2.03798	2.13285	3.39296	3.27882	1.94541	3.19517	1.84458	1.91267	3.48015	3.52995	3.57942	-0.968093
ENSG00000130940	CASZ1	protein_coding	human	249.019	345.268	265.555	270.242	330.622	260.648	236.768	394.436	241.506	304.174	318.028	233.015	315.103	299.853	246.78	-0.133227	0.394313	0.237099	-0.0848115	0.357666	0.1231	0.0655459	-0.0360903	-0.114788	0.563278	-0.156276	0.386924	0.473544	-0.233133	0.218193	0.131267	0.123982	0.127246	0.124549	0.118583	0.138999	0.126625	0.114688	0.136754	0.124812	0.122882	0.130172	0.115116	0.12921	0.135354	-1.01493
ENSG00000272078	AL139423.1	lncRNA	human	0.953372	1.30931	1.30802	0.620059	1.4775	1.9785	0.362084	1.52397	1.87787	0.98108	1.35172	1.01947	0.818939	2.16398	1.38616	-0.672288	-0.196315	0.481875	-2.73602	0.343157	1.3083	-2.05774	0.55583	0.822646	0.521664	0.710841	1.17838	3.11799	0.976649	4.07408	2.05543	1.94479	1.69622	2.65003	1.70565	1.55817	3.16541	1.82887	1.4721	2.15132	1.79787	1.90049	2.38506	1.47913	2.0399	-0.327079
ENSG00000225158	HSPE1P24	processed_pseudogene	human	0	0	0	0	0	0	0	0	0	0	0	0	0	0	0	NA	NA	NA	NA	NA	NA	NA	NA	NA	NA	NA	NA	NA	NA	NA	NA	NA	NA	NA	NA	NA	NA	NA	NA	NA	NA	NA	NA	NA	NA	NA
ENSG00000175262	C1orf127	protein_coding	human	0.1497	0.172413	0.139937	0.15967	0.166899	0.142694	0	0	0	0	0	0	0	0	0	-0.703018	-1.09864	-0.50416	-0.89183	-1.00226	-0.569223	NA	NA	NA	NA	NA	NA	NA	NA	NA	4.08047	4.08047	4.08047	4.08047	4.08047	4.08047	NA	NA	NA	NA	NA	NA	NA	NA	NA	-0.172288
ENSG00000215785	CFL1P6	processed_pseudogene	human	0.171761	0	0	0	0	0.196875	0.168454	0	0.166821	0.178107	0	0.146035	0	0.198997	0.190834	1.22054	NA	NA	NA	NA	1.35433	-1.13359	NA	0.896211	-1.32153	NA	-0.746246	NA	1.3971	1.29502	4.08047	NA	NA	NA	NA	4.08047	4.08047	NA	4.08047	4.08047	NA	4.08047	NA	4.08047	4.08047	0.299116
ENSG00000120948	TARDBP	protein_coding	human	3269.83	3765.71	2846.82	3354.72	3708.05	2824.96	3386.12	4275.18	2483.61	3772.39	3305.2	2869.56	3822.63	3230.85	2922.91	0.279421	0.286933	0.0845337	0.172918	0.33155	0.000260438	-0.0895507	0.0455719	-0.0844205	0.0432672	-0.201057	-0.178304	0.189678	-0.328914	-0.161649	0.0595046	0.0589246	0.0585118	0.0547717	0.0695869	0.072995	0.0474465	0.0598772	0.068986	0.0525249	0.0508403	0.0526909	0.0586317	0.0761186	0.0657851	4.69578
ENSG00000277726	AL109811.3	protein_coding	human	0	0	0	0	0	0	0	0	0	0	0	0	0	0	0	NA	NA	NA	NA	NA	NA	NA	NA	NA	NA	NA	NA	NA	NA	NA	NA	NA	NA	NA	NA	NA	NA	NA	NA	NA	NA	NA	NA	NA	NA	NA
ENSG00000009724	MASP2	protein_coding	human	7.6505	9.93636	6.11316	10.1571	11.4671	7.01279	11.4472	15.7304	6.83325	11.3633	9.52304	7.43278	15.5501	11.7651	10.5551	0.842823	1.11189	0.465104	1.31359	1.47663	0.762993	0.488763	0.365478	0.296346	0.303533	-0.644693	-0.359744	0.19224	-0.702406	-0.533753	0.700848	0.636302	0.816061	0.629681	0.621049	0.764613	0.557301	0.504178	0.784495	0.558687	0.664142	0.728387	0.503156	0.610192	0.6183	1.20258
ENSG00000271895	AL109811.2	lncRNA	human	6.9738	6.66383	7.67563	9.169	8.70019	6.0016	7.70638	6.91756	5.53475	5.31011	6.19041	6.39305	9.43233	6.1934	6.65504	-0.302655	-0.90783	0.188605	0.31275	0.0566717	-0.622885	0.6313	0.962156	-0.810698	-0.574827	1.09821	0.506577	-0.225379	-0.673722	-0.918308	0.733943	0.767947	0.702839	0.635663	0.675631	0.83675	0.685246	0.770188	0.853636	0.825212	0.791653	0.759702	0.639902	0.835945	0.790686	-0.412368
ENSG00000116649	SRM	protein_coding	human	2891.07	3046.38	2131.77	3004.04	2939.91	2269.64	3491.89	3688.09	2050.63	3569.48	2740.1	2587.35	3596.44	2788.27	2833.89	0.76782	0.564697	0.176686	0.705147	0.558073	0.285774	-0.0457812	-0.00540455	0.108084	-0.167542	-0.3865	-0.574579	-0.115847	-0.270343	-0.409194	0.0685004	0.0715303	0.0683208	0.0647157	0.0746208	0.0824582	0.052654	0.0628409	0.0724456	0.0606023	0.0595348	0.0578604	0.0591227	0.0766872	0.0694858	11.209
ENSG00000171824	EXOSC10	protein_coding	human	1969.7	2121.61	1689.4	2072.25	2053.94	1791.82	2103.94	2257.47	1564.37	2154.56	1855.73	1719.74	2195.84	1897.62	1908.88	0.304178	0.133504	0.0699329	0.266346	0.133584	0.170791	-0.0205549	0.00113229	0.100286	-0.134796	-0.0622953	-0.217483	-0.101716	0.0395263	-0.0851419	0.0629054	0.0607644	0.0612521	0.0558142	0.0644453	0.0774878	0.053551	0.0585033	0.0751749	0.0593593	0.0579894	0.0601866	0.0558346	0.0765576	0.0705894	4.83548
ENSG00000226849	AL109811.1	lncRNA	human	4.75027	5.87513	6.9749	7.16147	6.99331	4.86151	4.4044	5.1825	4.54026	3.03981	5.49652	4.48458	6.53151	4.26116	4.47069	-1.46085	-1.01025	0.186325	-0.120356	-0.313655	-1.13073	1.35936	0.701649	-1.32039	0.458801	1.20175	1.66356	-0.163241	-0.815205	-1.00383	0.926144	0.86435	0.732798	0.719394	0.71659	0.937657	0.940604	0.896387	0.955871	1.14782	0.89423	0.950307	0.740988	0.965249	0.964462	-1.57735
ENSG00000230337	EXOSC10-AS1	lncRNA	human	12.0072	13.3536	11.438	11.7262	12.0131	12.4479	12.267	13.9759	12.0539	13.8164	13.1358	11.7708	12.2718	12.9375	12.5959	0.360952	0.275013	0.404563	0.113285	0.0605334	0.547923	-0.233612	-0.218898	0.144257	-0.0490686	0.128735	0.0597588	-0.0222347	0.492506	0.447121	0.586539	0.557036	0.604506	0.594343	0.596107	0.584149	0.545361	0.526018	0.555066	0.508628	0.532298	0.561993	0.562025	0.551234	0.549948	0.615394
ENSG00000198793	MTOR	protein_coding	human	3359.51	3534.44	2964.72	3609.59	3339.54	3078.78	3483.29	3383.88	2614.33	3409.51	3005.29	2857.27	3465.59	2943.78	3176.87	0.149285	-0.101103	-0.0150778	0.166734	-0.173745	0.0298837	0.0347965	-0.0712683	0.0438048	-0.214573	0.087358	-0.147584	-0.309386	0.205657	-0.127011	0.0582496	0.0617986	0.0605926	0.0552133	0.0626545	0.0780239	0.0443989	0.0516917	0.0714993	0.0508576	0.0534407	0.050872	0.0479621	0.0713209	0.0667547	2.56286
ENSG00000225602	MTOR-AS1	lncRNA	human	0	0	0	0	0.182186	0	0	0.19265	0	0	0	0	0.180468	0.159376	0	NA	NA	NA	NA	0.921293	NA	NA	1.0595	NA	NA	NA	NA	0.88249	-0.526457	NA	NA	NA	NA	NA	4.08047	NA	NA	4.08047	NA	NA	NA	NA	4.08047	4.08047	NA	NA
ENSG00000253086	RNU6-537P	snRNA	human	0	0	0	0	0	0	0	0	0	0	0	0	0	0	0	NA	NA	NA	NA	NA	NA	NA	NA	NA	NA	NA	NA	NA	NA	NA	NA	NA	NA	NA	NA	NA	NA	NA	NA	NA	NA	NA	NA	NA	NA	NA
ENSG00000171819	ANGPTL7	protein_coding	human	1.0584	1.44603	1.03286	1.10123	1.14711	1.04683	0.310365	0.604846	0.344449	0.574462	0.579294	0.332288	0.3138	0.339878	0.324447	-2.19198	-1.45042	-1.99386	-2.38185	-2.49052	-2.06079	-0.171807	-1.13114	-0.0655584	0.869499	-0.637972	0.21554	-0.07928	0.435331	0.333251	2.10954	1.88736	2.12591	2.09671	2.05549	2.1497	3.3946	2.74298	3.30977	2.7386	2.77601	3.33208	3.42486	3.36081	3.45887	-1.03908
ENSG00000207451	RNU6-291P	snRNA	human	0	0	0	0	0	0	0	0	0	0	0	0	0	0	0	NA	NA	NA	NA	NA	NA	NA	NA	NA	NA	NA	NA	NA	NA	NA	NA	NA	NA	NA	NA	NA	NA	NA	NA	NA	NA	NA	NA	NA	NA	NA
ENSG00000238173	RPL39P6	processed_pseudogene	human	0	0	0	0	0	0	0	0	0	0	0	0	0	0	0	NA	NA	NA	NA	NA	NA	NA	NA	NA	NA	NA	NA	NA	NA	NA	NA	NA	NA	NA	NA	NA	NA	NA	NA	NA	NA	NA	NA	NA	NA	NA
ENSG00000120942	UBIAD1	protein_coding	human	921.278	924.367	707.932	1000.16	893.32	726.236	1148.2	1077.44	677.394	1090.1	859.395	847.176	1141.65	849.508	939.158	0.752849	0.425316	0.269621	0.792066	0.424464	0.278631	0.0566941	0.00122022	0.00732299	-0.292225	-0.153885	-0.466598	-0.336726	-0.144455	-0.503766	0.0853086	0.0865462	0.0873475	0.0792705	0.0848079	0.110031	0.0714085	0.0753076	0.104105	0.0787243	0.080292	0.0803281	0.0706305	0.100888	0.0973029	8.825
ENSG00000238199	UBE2V2P3	processed_pseudogene	human	0	0.214529	0.202873	0.33905	0.162733	0.361988	0.312358	0.387233	0.485728	0.198177	0.396122	0.186253	0.499576	0.507244	0.646628	NA	0.941774	1.41939	1.92475	0.921293	2.19249	1.68089	-0.00018122	0.776485	0.720002	0.498337	1.17731	-0.96998	1.27829	0.28791	NA	4.06594	4.08047	3.33864	4.08047	3.30694	3.33911	3.19717	2.74354	4.06582	3.16612	4.08047	2.72116	2.73252	2.40162	NA
ENSG00000284646	AL031291.1	lncRNA	human	0	0	0	0	0	0	0	0	0	0	0	0	0	0	0	NA	NA	NA	NA	NA	NA	NA	NA	NA	NA	NA	NA	NA	NA	NA	NA	NA	NA	NA	NA	NA	NA	NA	NA	NA	NA	NA	NA	NA	NA	NA
ENSG00000224338	MTCYBP45	processed_pseudogene	human	0	0	0	0	0	0	0	0	0	0	0	0	0	0	0	NA	NA	NA	NA	NA	NA	NA	NA	NA	NA	NA	NA	NA	NA	NA	NA	NA	NA	NA	NA	NA	NA	NA	NA	NA	NA	NA	NA	NA	NA	NA
ENSG00000204624	DISP3	protein_coding	human	5.94608	7.65175	6.6044	6.50405	7.44235	6.65476	2.96031	5.06911	4.08	3.77911	4.61779	3.41369	4.09492	4.4887	3.7498	-1.64565	-1.063	-0.838511	-1.51018	-1.04172	-0.90151	0.154845	0.0219815	-0.0659935	0.618481	0.229203	0.829204	0.497994	0.14614	0.6226	0.84398	0.708793	0.80025	0.798176	0.708501	0.795439	1.08981	0.836907	1.00702	0.975031	0.926494	1.07423	0.937995	0.920881	1.02836	-1.94987
ENSG00000285833	AL590989.1	lncRNA	human	0	0	0	0	0	0	0	0	0	0	0	0	0	0	0	NA	NA	NA	NA	NA	NA	NA	NA	NA	NA	NA	NA	NA	NA	NA	NA	NA	NA	NA	NA	NA	NA	NA	NA	NA	NA	NA	NA	NA	NA	NA
ENSG00000235643	LINC01647	lncRNA	human	0	0.0922998	2.22624	0	0.147916	3.48153	0	0.249842	4.91793	0.085237	2.41726	2.0471	0.145929	3.65776	3.40042	NA	0.766694	4.82964	NA	0.921293	5.45448	NA	0.154231	0.645235	0.54332	4.02939	4.58841	0.88249	4.53649	5.39545	NA	4.0717	3.50637	NA	4.08047	1.51933	NA	3.7331	0.949201	4.07162	1.68975	3.507	4.08047	1.48184	1.51916	NA
ENSG00000284708	AL031731.1	lncRNA	human	0	0	0	0	0	0	0	0	0	0	0	0	0	0	0	NA	NA	NA	NA	NA	NA	NA	NA	NA	NA	NA	NA	NA	NA	NA	NA	NA	NA	NA	NA	NA	NA	NA	NA	NA	NA	NA	NA	NA	NA	NA
ENSG00000116661	FBXO2	protein_coding	human	93.4108	102.079	88.9316	100.024	96.9923	87.0434	55.6551	53.5468	45.5587	54.5092	52.6587	49.7426	54.8346	46.4976	50.6458	-1.20222	-1.43904	-1.12317	-1.1947	-1.5587	-1.32155	0.0249746	-0.114271	-0.200658	-0.203903	0.320981	0.0963045	-0.333332	0.236865	-0.119187	0.219155	0.217755	0.22355	0.212812	0.219691	0.242133	0.257096	0.271207	0.293534	0.263438	0.270284	0.269596	0.263117	0.295756	0.28718	-5.48573
ENSG00000132879	FBXO44	protein_coding	human	514.685	638.375	557.459	572.243	626.525	560.233	393.548	549.545	434.652	442.904	493.41	394.875	488.835	484.683	439.907	-0.771483	-0.483219	-0.260581	-0.621091	-0.44228	-0.314458	0.167269	0.041323	-0.0544858	0.323993	0.223795	0.527597	0.20977	0.130239	0.317063	0.100138	0.0975547	0.0979154	0.0954484	0.094647	0.104753	0.100654	0.0943745	0.105598	0.101172	0.0990861	0.102859	0.0939735	0.101394	0.104169	-7.70417
ENSG00000116663	FBXO6	protein_coding	human	85.9776	100.861	94.9289	84.1497	97.468	94.3694	70.6099	96.7579	87.7009	85.1624	94.8351	81.0853	80.155	90.7631	78.9721	-0.227274	-0.168786	0.250419	-0.51661	-0.163466	0.172933	-0.27243	0.00659555	-0.0779994	0.0945404	0.420375	0.494392	0.384212	0.338671	0.7	0.209228	0.199728	0.199688	0.21351	0.197505	0.207058	0.225175	0.200935	0.208258	0.209828	0.202295	0.211864	0.215663	0.207754	0.223881	-1.08625
ENSG00000116670	MAD2L2	protein_coding	human	487.167	572.236	457.531	524.444	534.912	483.95	494.297	590.484	425.406	536.989	503.927	429.421	540.396	497.315	487	0.0791192	0.137657	0.0882301	0.100504	0.0424518	0.184428	0.0377276	-0.0935854	0.0955603	0.0938366	-0.0481495	0.0256208	-0.0268486	0.144021	0.0944287	0.101926	0.0977817	0.103176	0.0955476	0.0985781	0.10946	0.0922915	0.0887626	0.107362	0.0932896	0.0952441	0.100514	0.0885141	0.101819	0.10071	0.776244
ENSG00000162490	DRAXIN	protein_coding	human	0.857252	0.649219	1.50164	0.31802	0.462842	1.29563	0.858804	0.826129	2.18962	1.20326	1.86139	1.87377	0.478604	1.44826	1.28171	2.14731	1.36869	3.16929	0.0699541	0.801144	2.89486	-2.0578	-0.549512	-0.282569	-0.762862	1.84015	1.03547	0.760573	2.07498	2.83145	2.27655	2.51575	1.83784	3.46483	2.79841	1.9559	2.23442	2.16589	1.31419	1.82947	1.52459	1.4607	2.75857	1.75286	1.94967	0.943231
ENSG00000177674	AGTRAP	protein_coding	human	791.488	916.588	770.339	838.792	867.839	772.728	730.135	872.695	652.654	795.466	775.195	669.634	796.464	733.358	708.907	-0.14636	-0.121358	-0.0300527	-0.170681	-0.189015	-0.0857456	-0.00749851	-0.0664147	-0.0567054	0.060722	0.0923149	0.132931	0.0131328	0.105077	0.0949958	0.0872712	0.0799535	0.0826095	0.0791072	0.081355	0.0935188	0.0823606	0.0757634	0.0926295	0.0831025	0.0786216	0.0872075	0.0766447	0.0905514	0.0898112	-1.67707
ENSG00000215910	C1orf167	protein_coding	human	0.649666	0.852094	0.445234	0.508209	0.527801	0.455424	0.168875	0.311565	0	0.463597	0.262042	0.14777	0	0	0	-1.2706	-0.854696	-2.03941	-2.42605	-2.53298	-2.10547	-1.13359	-1.6747	NA	0.447799	-1.17722	-0.746246	NA	NA	NA	2.48662	2.16995	2.975	2.85341	2.78452	3.00725	4.08047	3.41038	NA	2.75518	3.63044	4.08047	NA	NA	NA	-0.510975
ENSG00000177553	C1orf167-AS1	lncRNA	human	0	0	0	0	0.182186	0.196875	0	0.19265	0.166821	0	0	0	0.180468	0.358373	0.190834	NA	NA	NA	NA	0.921293	1.35433	NA	1.0595	0.896211	NA	NA	NA	0.88249	0.435331	1.29502	NA	NA	NA	NA	4.08047	4.08047	NA	4.08047	4.08047	NA	NA	NA	4.08047	3.29877	4.08047	NA
ENSG00000177000	MTHFR	protein_coding	human	437.341	545.776	471.26	501.161	538.781	487.933	382.943	518.622	406.381	416.681	454.394	363.645	475.234	463.968	431.421	-0.526061	-0.245805	-0.0720969	-0.289798	-0.187781	-0.0349461	0.253243	0.0594273	0.036037	0.316211	0.175043	0.470506	0.133373	0.154429	0.264691	0.101469	0.0975421	0.104513	0.0966521	0.0977371	0.109439	0.101818	0.0978818	0.117158	0.101659	0.105234	0.109984	0.0983181	0.11022	0.109948	-5.18444
ENSG00000011021	CLCN6	protein_coding	human	488.582	565.925	536.515	562.085	582.542	540.195	383.96	459.84	420.244	375.855	434.848	375.432	463.233	451.055	435.404	-0.816277	-0.775313	-0.252178	-0.536219	-0.553968	-0.301622	0.296716	0.222783	-0.0506047	0.0760747	0.525151	0.580887	0.0132102	0.254392	0.245031	0.101334	0.0984185	0.100335	0.0927219	0.0980967	0.114591	0.101399	0.102922	0.11995	0.106884	0.105684	0.108871	0.0978793	0.11795	0.113312	-8.05535
ENSG00000276470	AL021155.3	misc_RNA	human	0	0	0	0	0	0	0	0	0	0	0	0	0	0	0	NA	NA	NA	NA	NA	NA	NA	NA	NA	NA	NA	NA	NA	NA	NA	NA	NA	NA	NA	NA	NA	NA	NA	NA	NA	NA	NA	NA	NA	NA	NA
ENSG00000278852	AL021155.4	misc_RNA	human	0	0	0	0	0	0	0	0	0	0	0	0	0	0	0	NA	NA	NA	NA	NA	NA	NA	NA	NA	NA	NA	NA	NA	NA	NA	NA	NA	NA	NA	NA	NA	NA	NA	NA	NA	NA	NA	NA	NA	NA	NA
ENSG00000175206	NPPA	protein_coding	human	0	0	0	0	0	0	0	0	0	0	0	0	0	0	0	NA	NA	NA	NA	NA	NA	NA	NA	NA	NA	NA	NA	NA	NA	NA	NA	NA	NA	NA	NA	NA	NA	NA	NA	NA	NA	NA	NA	NA	NA	NA
ENSG00000275915	AL021155.2	misc_RNA	human	0	0	0	0	0	0	0	0	0	0	0	0	0	0	0	NA	NA	NA	NA	NA	NA	NA	NA	NA	NA	NA	NA	NA	NA	NA	NA	NA	NA	NA	NA	NA	NA	NA	NA	NA	NA	NA	NA	NA	NA	NA
ENSG00000120937	NPPB	protein_coding	human	0.515282	0.429057	0	1.02138	0.295833	0.165113	1.44802	0.747009	0.141278	0.930677	0.366345	0.438105	1.31789	0.425363	1.04838	2.63711	2.09493	NA	3.51502	1.69434	1.35433	0.866825	-0.315329	0.896211	-0.593644	-1.64131	-2.16231	-1.734	-0.350739	-2.14982	3.05653	3.33782	NA	2.07006	3.77676	4.08047	1.66316	2.53697	4.08047	2.28673	3.47926	3.18892	1.80047	3.09144	2.00138	0.862778
ENSG00000224904	AL021155.1	processed_pseudogene	human	0	0	0	0	0	0.573494	0	0	0.489304	0	0	0	0	0.581393	0.560023	NA	NA	NA	NA	NA	2.83948	NA	NA	2.38148	NA	NA	NA	NA	2.88213	2.78017	NA	NA	NA	NA	NA	2.59826	NA	NA	2.65743	NA	NA	NA	NA	2.54112	2.59847	NA
ENSG00000285646	AL021155.5	lncRNA	human	14.0738	18.9467	17.1149	19.8945	24.0452	19.2523	16.5733	26.0784	18.4788	15.5295	18.636	14.1705	26.5503	25.1502	21.3799	-0.34778	0.127496	0.407362	0.450766	0.816123	0.650967	0.813023	0.690641	0.243235	0.508498	0.282931	0.770478	0.395513	-0.156529	0.213862	0.527262	0.460348	0.497093	0.458437	0.411363	0.478718	0.478279	0.377697	0.475128	0.480271	0.457778	0.520968	0.378922	0.399014	0.443506	-0.659596
ENSG00000199347	RNU5E-1	snRNA	human	0	0	0	0	0	0	0	0	0	0	0	0	0	0	0	NA	NA	NA	NA	NA	NA	NA	NA	NA	NA	NA	NA	NA	NA	NA	NA	NA	NA	NA	NA	NA	NA	NA	NA	NA	NA	NA	NA	NA	NA	NA
ENSG00000201801	RNU5E-4P	snRNA	human	3.96984	3.88708	4.35833	4.80267	5.04646	4.45457	4.44541	4.65534	4.4005	3.5766	4.03193	4.01521	5.53149	5.10186	4.86798	0.0224706	-0.484101	0.455267	0.365691	0.372437	0.46662	0.358203	0.86046	0.0138322	-0.471123	0.939734	0.449495	0.0383802	0.0963716	0.114719	0.997901	1.05562	0.920136	0.892874	0.877185	0.96991	0.927229	0.969255	0.931829	1.09015	1.00881	0.963118	0.827044	0.898982	0.915853	0.0225179
ENSG00000116685	KIAA2013	protein_coding	human	1317.17	1476.46	1133.27	1389.64	1405.07	1196.29	1378.31	1563.03	1020.83	1459.78	1261.79	1125.3	1467.71	1262.7	1247.42	0.23256	0.165407	0.000560892	0.20072	0.120613	0.0918076	-0.0149467	-0.043248	0.090317	-0.031949	-0.163158	-0.215402	-0.0487756	-0.0267242	-0.0986696	0.0729834	0.0748928	0.0756984	0.0777411	0.0767813	0.0913436	0.068547	0.0676699	0.0868617	0.0663858	0.0693258	0.068006	0.0726569	0.0864022	0.0889891	3.18647
ENSG00000083444	PLOD1	protein_coding	human	2583.49	2908.02	2449.64	2776.02	2847.5	2563.77	2387.78	2741.94	2083.63	2485.96	2360	2099.44	2618.41	2418.19	2358.47	-0.182408	-0.245204	-0.1416	-0.16277	-0.208516	-0.0710033	0.036362	0.0382043	0.06954	-0.027139	0.104665	0.057323	-0.014267	0.139269	0.101764	0.0623994	0.0660185	0.0713938	0.0616136	0.06607	0.0792754	0.0491312	0.052971	0.0786185	0.0530291	0.0640125	0.0617792	0.0513968	0.0702244	0.068615	-2.92323
ENSG00000287384	AL096840.3	lncRNA	human	0	0	0	0.153878	0.162733	0	0.141911	0.169619	0	0	0	0	0.3138	0.14088	0.133614	NA	NA	NA	1.03172	0.921293	NA	0.789963	1.0595	NA	NA	NA	NA	-0.07928	-0.526457	-0.628535	NA	NA	NA	4.08047	4.08047	NA	4.08047	4.08047	NA	NA	NA	NA	3.42486	4.08047	4.08047	NA
ENSG00000116688	MFN2	protein_coding	human	3063.41	3212.49	2644.97	3261.52	3103.73	2766.42	3346.5	3372.11	2463.19	3311.17	2868.37	2724.46	3406.57	2889.6	3019.32	0.341484	0.0972292	0.127564	0.334377	0.0931108	0.190014	0.00981418	-0.00234256	0.0617702	-0.208856	0.03164	-0.197244	-0.209765	0.09884	-0.134159	0.0620692	0.0673589	0.0695393	0.0592342	0.0677884	0.0764151	0.0436416	0.0540941	0.0725671	0.0519913	0.0611598	0.0569077	0.0485714	0.0671396	0.0619598	5.50166
ENSG00000270914	AL096840.2	processed_pseudogene	human	0	0	0	0	0	0	0	0	0	0	0	0	0	0	0	NA	NA	NA	NA	NA	NA	NA	NA	NA	NA	NA	NA	NA	NA	NA	NA	NA	NA	NA	NA	NA	NA	NA	NA	NA	NA	NA	NA	NA	NA	NA
ENSG00000116691	MIIP	protein_coding	human	259.371	344.131	259.065	284.086	333.992	260.753	250.754	386.22	228.471	304.339	301.367	228.109	322.466	294.064	250.376	-0.112215	0.291426	0.0743338	-0.0376405	0.297983	0.0290363	0.0910705	0.00785373	-0.0466767	0.438937	-0.215843	0.203449	0.366678	-0.267293	0.0766185	0.1317	0.119926	0.13623	0.123828	0.117537	0.150043	0.124756	0.107546	0.154151	0.119774	0.125942	0.138172	0.111499	0.136945	0.143216	-0.852048
ENSG00000202461	AL096840.1	misc_RNA	human	0	0	0	0	0	0	0	0	0	0	0	0	0	0	0	NA	NA	NA	NA	NA	NA	NA	NA	NA	NA	NA	NA	NA	NA	NA	NA	NA	NA	NA	NA	NA	NA	NA	NA	NA	NA	NA	NA	NA	NA	NA
ENSG00000276869	MIR6729	miRNA	human	0	0	0	0	0	0	0	0	0	0	0	0	0	0	0	NA	NA	NA	NA	NA	NA	NA	NA	NA	NA	NA	NA	NA	NA	NA	NA	NA	NA	NA	NA	NA	NA	NA	NA	NA	NA	NA	NA	NA	NA	NA
ENSG00000243539	RN7SL649P	misc_RNA	human	0	0	0	0	0	0	0	0	0	0	0	0	0	0	0	NA	NA	NA	NA	NA	NA	NA	NA	NA	NA	NA	NA	NA	NA	NA	NA	NA	NA	NA	NA	NA	NA	NA	NA	NA	NA	NA	NA	NA	NA	NA
ENSG00000120949	TNFRSF8	protein_coding	human	2.44034	2.03149	1.73446	2.55327	1.45783	2.52797	3.54529	2.17743	2.67866	3.13676	2.36666	2.63249	2.68747	2.65545	3.55571	1.59386	0.850736	1.04422	1.55246	0.241499	1.74092	-0.0246399	-0.607572	0.693438	-0.744785	0.20712	-0.531556	-1.27353	1.49439	0.196162	1.27414	1.41688	1.45736	1.26965	1.60047	1.29421	0.999591	1.3887	1.17816	1.10841	1.28401	1.16443	1.2358	1.2588	1.03774	1.25092
ENSG00000201135	RNU6-777P	snRNA	human	0	0	0	0	0	0	0	0	0	0	0	0	0	0	0	NA	NA	NA	NA	NA	NA	NA	NA	NA	NA	NA	NA	NA	NA	NA	NA	NA	NA	NA	NA	NA	NA	NA	NA	NA	NA	NA	NA	NA	NA	NA
ENSG00000227875	RPL23AP89	processed_pseudogene	human	0	0	0	0	0	0	0	0	0	0	0	0	0	0	0	NA	NA	NA	NA	NA	NA	NA	NA	NA	NA	NA	NA	NA	NA	NA	NA	NA	NA	NA	NA	NA	NA	NA	NA	NA	NA	NA	NA	NA	NA	NA
ENSG00000285604	AL357835.1	lncRNA	human	0	0	0	0	0	0	0	0	0	0	0	0	0	0	0	NA	NA	NA	NA	NA	NA	NA	NA	NA	NA	NA	NA	NA	NA	NA	NA	NA	NA	NA	NA	NA	NA	NA	NA	NA	NA	NA	NA	NA	NA	NA
ENSG00000283789	MIR7846	miRNA	human	0	0	0	0	0	0	0	0	0	0	0	0	0	0	0	NA	NA	NA	NA	NA	NA	NA	NA	NA	NA	NA	NA	NA	NA	NA	NA	NA	NA	NA	NA	NA	NA	NA	NA	NA	NA	NA	NA	NA	NA	NA
ENSG00000028137	TNFRSF1B	protein_coding	human	4.8309	6.37357	3.53687	6.14659	5.11606	5.25447	7.5493	8.48389	5.21203	7.86111	6.3159	4.88154	8.08795	6.98638	7.78015	1.2062	1.48926	0.656949	1.54162	1.08904	1.43343	0.351714	-0.401294	0.778669	0.318939	-0.837343	-0.539992	-0.428275	0.338705	-0.110895	0.937671	0.927912	1.07479	0.84949	0.917987	1.00009	0.69717	0.753997	0.943067	0.761059	0.88068	0.886311	0.686856	0.824552	0.774737	1.28638
ENSG00000263676	MIR4632	miRNA	human	0	0	0	0	0	0	0	0	0	0	0	0	0	0	0	NA	NA	NA	NA	NA	NA	NA	NA	NA	NA	NA	NA	NA	NA	NA	NA	NA	NA	NA	NA	NA	NA	NA	NA	NA	NA	NA	NA	NA	NA	NA
ENSG00000225196	RPL10P17	processed_pseudogene	human	0	0	0	0	0	0	0	0	0	0	0	0	0	0	0	NA	NA	NA	NA	NA	NA	NA	NA	NA	NA	NA	NA	NA	NA	NA	NA	NA	NA	NA	NA	NA	NA	NA	NA	NA	NA	NA	NA	NA	NA	NA
ENSG00000252969	AL031276.1	snoRNA	human	0	0	0	0	0	0	0	0	0	0	0	0	0	0	0	NA	NA	NA	NA	NA	NA	NA	NA	NA	NA	NA	NA	NA	NA	NA	NA	NA	NA	NA	NA	NA	NA	NA	NA	NA	NA	NA	NA	NA	NA	NA
ENSG00000048707	VPS13D	protein_coding	human	1843.05	2010.71	1857.53	2034.98	1910.42	1962.29	1848.64	1877.52	1774.59	1815.96	1839.37	1681.29	1908.92	1848.57	1949.7	-0.0319032	-0.183936	0.178566	0.0647598	-0.241553	0.26569	0.113753	-0.0561953	0.0862067	-0.115929	0.363807	0.227454	-0.275539	0.50942	0.2111	0.0688096	0.0694022	0.0686589	0.0825463	0.0730495	0.0854403	0.128285	0.0704653	0.0823949	0.0674548	0.067113	0.0669027	0.084363	0.086012	0.0953133	-0.463645
ENSG00000239149	SNORA59A	snoRNA	human	0	0.998653	0.383058	0.35681	0.344919	0.196875	0.329418	1.37779	0.501269	0.925313	1.25471	0.35144	0.698919	0.499253	0.500619	NA	3.35208	2.29685	1.98548	1.87764	1.35433	1.74408	-1.4884	-0.945193	3.1302	-1.03591	2.05276	-0.0788985	-0.513488	-0.61437	NA	2.11964	3.17859	3.27683	3.27836	4.08047	3.27475	1.74401	2.71581	2.10615	1.78445	3.2177	2.30592	2.74275	2.76935	NA
ENSG00000229484	LINC02766	lncRNA	human	1.31643	1.28395	1.08647	1.16234	1.0494	1.59498	0.503575	0.203333	0.768285	0.570026	0.38368	0.501525	0.154182	0.701095	0.809195	-1.3516	-2.6107	-2.06482	-2.45199	-3.52559	-0.312902	-1.09119	-0.980163	1.72616	-1.19891	0.497382	-0.702772	-1.04106	3.18228	2.12408	1.76361	1.90398	1.99009	1.96414	2.05929	1.57897	2.68441	4.06602	2.32467	2.57428	3.19827	2.70055	4.08047	2.52454	2.33301	-0.766383
ENSG00000162496	DHRS3	protein_coding	human	3415.96	3181.8	3187.9	3575.73	3077.08	3258.03	2896.97	2022.89	2454.28	2488.43	2327.15	2578.02	2497.83	2294.17	2743.55	-0.33208	-1.13243	-0.340413	-0.397773	-1.13826	-0.340433	-0.0490532	-0.00396902	-0.000658223	-0.76397	0.793131	0.00816771	-0.709019	0.799598	0.0679272	0.0543801	0.0749376	0.0560171	0.0513492	0.0721991	0.0683259	0.0466987	0.0848295	0.0674036	0.0712666	0.072461	0.0520134	0.0655714	0.0812441	0.0628041	-6.10664
ENSG00000221340	RNU6ATAC18P	snRNA	human	4.68172	2.85195	2.97966	3.67881	3.04405	3.15797	3.7384	1.07902	1.78328	2.97916	1.34363	3.03989	2.03665	1.68526	2.27477	0.244579	-2.55295	-1.04547	-0.735796	-1.86136	-0.873429	-0.959392	0.729363	0.167324	-2.75789	1.53632	-1.27216	-1.10013	0.985598	-0.133839	0.910614	1.33092	1.14786	1.04268	1.1865	1.11865	1.03787	1.82516	1.39082	1.31179	1.68681	1.14952	1.37964	1.46441	1.29446	0.268587
ENSG00000276830	MIR6730	miRNA	human	0.443318	0.600786	0.414992	0.473677	1.14776	0.62185	0	0.781731	0.166821	0.085237	0.0788701	0	0.645633	0.769132	0.190834	-2.15286	-1.63559	-1.95463	-2.34285	0.399372	-1.06185	NA	2.03446	0.896211	0.54332	-0.30784	NA	2.77784	-1.45958	1.29502	2.97359	2.55257	3.04886	2.9223	1.78162	2.56168	NA	2.18184	4.08047	4.07162	4.07171	NA	2.40516	2.21641	4.08047	-0.723993
ENSG00000272482	AC254633.1	lncRNA	human	49.1606	47.102	52.0128	50.2653	45.7964	49.7094	39.1682	30.3603	41.9095	35.503	39.6254	41.4906	34.6703	35.8026	39.8636	-0.412834	-1.14272	-0.0359697	-0.564054	-1.10271	-0.238318	-0.13492	0.0368682	-0.20233	-0.690478	1.10682	0.39453	-0.506223	0.867165	0.338786	0.284516	0.309124	0.280808	0.279522	0.305035	0.300563	0.306814	0.374592	0.322373	0.338361	0.333785	0.30834	0.33643	0.353745	0.326549	-1.45101
ENSG00000204518	AADACL4	protein_coding	human	0	0.199842	0	0	0	0	0	0.203333	0	0.185554	0.17073	0	0	0	0	NA	0.941774	NA	NA	NA	NA	NA	-0.980163	NA	0.720002	-0.482655	NA	NA	NA	NA	NA	4.06594	NA	NA	NA	NA	NA	4.06602	NA	4.06582	4.06596	NA	NA	NA	NA	NA
ENSG00000226166	AC244670.1	processed_pseudogene	human	0	0	0	0	0	0	0	0	0	0	0	0	0	0	0	NA	NA	NA	NA	NA	NA	NA	NA	NA	NA	NA	NA	NA	NA	NA	NA	NA	NA	NA	NA	NA	NA	NA	NA	NA	NA	NA	NA	NA	NA	NA
ENSG00000188984	AADACL3	protein_coding	human	0	0	0	0	0	0	0	0	0	0	0	0	0	0	0	NA	NA	NA	NA	NA	NA	NA	NA	NA	NA	NA	NA	NA	NA	NA	NA	NA	NA	NA	NA	NA	NA	NA	NA	NA	NA	NA	NA	NA	NA	NA
ENSG00000157330	C1orf158	protein_coding	human	0	0.199842	0	0	0	0	0	0.203333	0	0.185554	0.17073	0	0	0	0	NA	0.941774	NA	NA	NA	NA	NA	-0.980163	NA	0.720002	-0.482655	NA	NA	NA	NA	NA	4.06594	NA	NA	NA	NA	NA	4.06602	NA	4.06582	4.06596	NA	NA	NA	NA	NA
ENSG00000116726	PRAMEF12	protein_coding	human	0	0	0	0	0.182186	0.165113	0	0.19265	0.141278	0	0	0	0.180468	0.326741	0.161583	NA	NA	NA	NA	0.921293	1.35433	NA	1.0595	0.896211	NA	NA	NA	0.88249	0.43533	1.29502	NA	NA	NA	NA	4.08047	4.08047	NA	4.08047	4.08047	NA	NA	NA	4.08047	3.40816	4.08047	NA
ENSG00000116721	PRAMEF1	protein_coding	human	0	0	0	0	0	0	0	0	0	0	0	0	0	0	0	NA	NA	NA	NA	NA	NA	NA	NA	NA	NA	NA	NA	NA	NA	NA	NA	NA	NA	NA	NA	NA	NA	NA	NA	NA	NA	NA	NA	NA	NA	NA
ENSG00000228338	LINC01784	lncRNA	human	0	0	0	0	0	0	0	0	0	0	0	0	0	0	0	NA	NA	NA	NA	NA	NA	NA	NA	NA	NA	NA	NA	NA	NA	NA	NA	NA	NA	NA	NA	NA	NA	NA	NA	NA	NA	NA	NA	NA	NA	NA
ENSG00000239810	PRAMEF11	protein_coding	human	0	0	0	0	0	0	0	0	0	0	0	0	0	0	0	NA	NA	NA	NA	NA	NA	NA	NA	NA	NA	NA	NA	NA	NA	NA	NA	NA	NA	NA	NA	NA	NA	NA	NA	NA	NA	NA	NA	NA	NA	NA
ENSG00000231103	PRAMEF30P	unprocessed_pseudogene	human	0	0	0	0	0	0	0	0	0	0	0	0	0	0	0	NA	NA	NA	NA	NA	NA	NA	NA	NA	NA	NA	NA	NA	NA	NA	NA	NA	NA	NA	NA	NA	NA	NA	NA	NA	NA	NA	NA	NA	NA	NA
ENSG00000179172	HNRNPCL1	protein_coding	human	0	0	0.202873	0.35681	0.182186	0.361988	0.329418	0.19265	0.485728	0	0.21295	0.186253	0.539301	0.525739	0.662201	NA	NA	1.41939	1.98548	0.921293	2.19249	1.74408	1.0595	0.776485	NA	1.55757	1.17731	-1.02632	1.27874	0.238516	NA	NA	4.08047	3.27683	4.08047	3.30694	3.27475	4.08047	2.74354	NA	4.08047	4.08047	2.65773	2.70308	2.38379	NA
ENSG00000120952	PRAMEF2	protein_coding	human	0	0	0	0	0	0	0	0	0	0	0	0	0	0	0	NA	NA	NA	NA	NA	NA	NA	NA	NA	NA	NA	NA	NA	NA	NA	NA	NA	NA	NA	NA	NA	NA	NA	NA	NA	NA	NA	NA	NA	NA	NA
ENSG00000243073	PRAMEF4	protein_coding	human	0	0	0	0	0	0	0	0	0	0	0	0	0	0	0	NA	NA	NA	NA	NA	NA	NA	NA	NA	NA	NA	NA	NA	NA	NA	NA	NA	NA	NA	NA	NA	NA	NA	NA	NA	NA	NA	NA	NA	NA	NA
ENSG00000187545	PRAMEF10	protein_coding	human	0	0	0	0	0	0	0	0	0	0	0	0	0	0	0	NA	NA	NA	NA	NA	NA	NA	NA	NA	NA	NA	NA	NA	NA	NA	NA	NA	NA	NA	NA	NA	NA	NA	NA	NA	NA	NA	NA	NA	NA	NA
ENSG00000204510	PRAMEF7	protein_coding	human	0	0	0	0	0	0	0	0	0	0	0	0	0	0	0	NA	NA	NA	NA	NA	NA	NA	NA	NA	NA	NA	NA	NA	NA	NA	NA	NA	NA	NA	NA	NA	NA	NA	NA	NA	NA	NA	NA	NA	NA	NA
ENSG00000207434	RNU6-1072P	snRNA	human	0	0	0	0	0	0	0	0	0	0	0	0	0	0	0	NA	NA	NA	NA	NA	NA	NA	NA	NA	NA	NA	NA	NA	NA	NA	NA	NA	NA	NA	NA	NA	NA	NA	NA	NA	NA	NA	NA	NA	NA	NA
ENSG00000234064	PRAMEF29P	unprocessed_pseudogene	human	0	0	0	0	0	0	0	0	0	0	0	0	0	0	0	NA	NA	NA	NA	NA	NA	NA	NA	NA	NA	NA	NA	NA	NA	NA	NA	NA	NA	NA	NA	NA	NA	NA	NA	NA	NA	NA	NA	NA	NA	NA
ENSG00000232423	PRAMEF6	protein_coding	human	0	0	0	0	0	0	0	0	0	0	0	0	0	0	0	NA	NA	NA	NA	NA	NA	NA	NA	NA	NA	NA	NA	NA	NA	NA	NA	NA	NA	NA	NA	NA	NA	NA	NA	NA	NA	NA	NA	NA	NA	NA
ENSG00000274178	PRAMEF28P	unprocessed_pseudogene	human	0	0	0	0	0	0	0	0	0	0	0	0	0	0	0	NA	NA	NA	NA	NA	NA	NA	NA	NA	NA	NA	NA	NA	NA	NA	NA	NA	NA	NA	NA	NA	NA	NA	NA	NA	NA	NA	NA	NA	NA	NA
ENSG00000274764	PRAMEF27	protein_coding	human	0	0	0	0	0	0	0	0	0	0	0	0	0	0	0	NA	NA	NA	NA	NA	NA	NA	NA	NA	NA	NA	NA	NA	NA	NA	NA	NA	NA	NA	NA	NA	NA	NA	NA	NA	NA	NA	NA	NA	NA	NA
ENSG00000277058	HNRNPCL3	protein_coding	human	0	0	0	0	0	0	0	0	0	0	0	0	0	0	0	NA	NA	NA	NA	NA	NA	NA	NA	NA	NA	NA	NA	NA	NA	NA	NA	NA	NA	NA	NA	NA	NA	NA	NA	NA	NA	NA	NA	NA	NA	NA
ENSG00000229571	PRAMEF25	protein_coding	human	0	0	0	0	0	0	0	0	0	0	0	0	0	0	0	NA	NA	NA	NA	NA	NA	NA	NA	NA	NA	NA	NA	NA	NA	NA	NA	NA	NA	NA	NA	NA	NA	NA	NA	NA	NA	NA	NA	NA	NA	NA
ENSG00000277862	PRAMEF34P	unprocessed_pseudogene	human	0	0	0	0	0	0	0	0	0	0	0	0	0	0	0	NA	NA	NA	NA	NA	NA	NA	NA	NA	NA	NA	NA	NA	NA	NA	NA	NA	NA	NA	NA	NA	NA	NA	NA	NA	NA	NA	NA	NA	NA	NA
ENSG00000236179	PRAMEF35P	unprocessed_pseudogene	human	0	0	0	0	0	0	0	0	0	0	0	0	0	0	0	NA	NA	NA	NA	NA	NA	NA	NA	NA	NA	NA	NA	NA	NA	NA	NA	NA	NA	NA	NA	NA	NA	NA	NA	NA	NA	NA	NA	NA	NA	NA
ENSG00000275774	HNRNPCL2	protein_coding	human	0	0.199842	0	0	0	0.211506	0	0.203333	0.181205	0.185554	0.17073	0	0	0.21503	0.207607	NA	0.941774	NA	NA	NA	1.35433	NA	-0.980163	0.896211	0.720002	-0.482655	NA	NA	1.3971	1.29502	NA	4.06594	NA	NA	NA	4.08047	NA	4.06602	4.08047	4.06582	4.06596	NA	NA	4.08047	4.08047	NA
ENSG00000229978	PRAMEF36P	transcribed_unprocessed_pseudogene	human	0	0	0	0	0	0	0	0	0	0	0	0	0	0	0	NA	NA	NA	NA	NA	NA	NA	NA	NA	NA	NA	NA	NA	NA	NA	NA	NA	NA	NA	NA	NA	NA	NA	NA	NA	NA	NA	NA	NA	NA	NA
ENSG00000233336	AC245056.1	lncRNA	human	0	0	0	0	0	0	0	0	0	0	0	0	0	0	0	NA	NA	NA	NA	NA	NA	NA	NA	NA	NA	NA	NA	NA	NA	NA	NA	NA	NA	NA	NA	NA	NA	NA	NA	NA	NA	NA	NA	NA	NA	NA
ENSG00000280267	PRAMEF26	protein_coding	human	0	0	0	0	0	0	0	0	0	0	0	0	0	0	0	NA	NA	NA	NA	NA	NA	NA	NA	NA	NA	NA	NA	NA	NA	NA	NA	NA	NA	NA	NA	NA	NA	NA	NA	NA	NA	NA	NA	NA	NA	NA
ENSG00000179412	HNRNPCL4	protein_coding	human	0	0	0	0	0	0	0	0	0	0	0	0	0	0	0	NA	NA	NA	NA	NA	NA	NA	NA	NA	NA	NA	NA	NA	NA	NA	NA	NA	NA	NA	NA	NA	NA	NA	NA	NA	NA	NA	NA	NA	NA	NA
ENSG00000204505	PRAMEF9	protein_coding	human	0	0	0	0	0	0	0	0	0	0	0	0	0	0	0	NA	NA	NA	NA	NA	NA	NA	NA	NA	NA	NA	NA	NA	NA	NA	NA	NA	NA	NA	NA	NA	NA	NA	NA	NA	NA	NA	NA	NA	NA	NA
ENSG00000279169	PRAMEF13	protein_coding	human	0	0	0	0	0	0	0	0	0	0	0	0	0	0	0	NA	NA	NA	NA	NA	NA	NA	NA	NA	NA	NA	NA	NA	NA	NA	NA	NA	NA	NA	NA	NA	NA	NA	NA	NA	NA	NA	NA	NA	NA	NA
ENSG00000279804	PRAMEF18	protein_coding	human	0	0	0	0	0	0	0	0	0	0	0	0	0	0	0	NA	NA	NA	NA	NA	NA	NA	NA	NA	NA	NA	NA	NA	NA	NA	NA	NA	NA	NA	NA	NA	NA	NA	NA	NA	NA	NA	NA	NA	NA	NA
ENSG00000250894	PRAMEF31P	unprocessed_pseudogene	human	0	0	0	0	0	0	0	0	0	0	0	0	0	0	0	NA	NA	NA	NA	NA	NA	NA	NA	NA	NA	NA	NA	NA	NA	NA	NA	NA	NA	NA	NA	NA	NA	NA	NA	NA	NA	NA	NA	NA	NA	NA
ENSG00000270601	PRAMEF5	protein_coding	human	0	0	0	0	0	0	0	0	0	0	0	0	0	0	0	NA	NA	NA	NA	NA	NA	NA	NA	NA	NA	NA	NA	NA	NA	NA	NA	NA	NA	NA	NA	NA	NA	NA	NA	NA	NA	NA	NA	NA	NA	NA
ENSG00000231219	PRAMEF32P	unprocessed_pseudogene	human	0	0	0	0	0	0	0	0	0	0	0	0	0	0	0	NA	NA	NA	NA	NA	NA	NA	NA	NA	NA	NA	NA	NA	NA	NA	NA	NA	NA	NA	NA	NA	NA	NA	NA	NA	NA	NA	NA	NA	NA	NA
ENSG00000207511	RNU6-771P	snRNA	human	0	0	0	0	0	0	0	0	0	0	0	0	0	0	0	NA	NA	NA	NA	NA	NA	NA	NA	NA	NA	NA	NA	NA	NA	NA	NA	NA	NA	NA	NA	NA	NA	NA	NA	NA	NA	NA	NA	NA	NA	NA
ENSG00000182330	PRAMEF8	protein_coding	human	0	0	0	0	0	0	0	0	0	0	0	0	0	0	0	NA	NA	NA	NA	NA	NA	NA	NA	NA	NA	NA	NA	NA	NA	NA	NA	NA	NA	NA	NA	NA	NA	NA	NA	NA	NA	NA	NA	NA	NA	NA
ENSG00000237700	PRAMEF33	protein_coding	human	0	0	0	0	0	0	0	0	0	0	0	0	0	0	0	NA	NA	NA	NA	NA	NA	NA	NA	NA	NA	NA	NA	NA	NA	NA	NA	NA	NA	NA	NA	NA	NA	NA	NA	NA	NA	NA	NA	NA	NA	NA
ENSG00000204501	PRAMEF15	protein_coding	human	0	0	0	0	0	0	0	0	0	0	0	0	0	0	0	NA	NA	NA	NA	NA	NA	NA	NA	NA	NA	NA	NA	NA	NA	NA	NA	NA	NA	NA	NA	NA	NA	NA	NA	NA	NA	NA	NA	NA	NA	NA
ENSG00000228229	AC243961.1	lncRNA	human	0	0	0	0	0	0	0	0	0	0	0	0	0	0	0	NA	NA	NA	NA	NA	NA	NA	NA	NA	NA	NA	NA	NA	NA	NA	NA	NA	NA	NA	NA	NA	NA	NA	NA	NA	NA	NA	NA	NA	NA	NA
ENSG00000204481	PRAMEF14	protein_coding	human	0.136856	0.157235	0.12825	0.146382	0.152193	0.131509	0	0	0	0	0	0	0	0	0	-0.703018	-1.09864	-0.50416	-0.89183	-1.00226	-0.569223	NA	NA	NA	NA	NA	NA	NA	NA	NA	4.08047	4.08047	4.08047	4.08047	4.08047	4.08047	NA	NA	NA	NA	NA	NA	NA	NA	NA	-0.172288
ENSG00000204480	PRAMEF19	protein_coding	human	0	0	0	0	0	0	0	0	0	0	0	0	0	0	0	NA	NA	NA	NA	NA	NA	NA	NA	NA	NA	NA	NA	NA	NA	NA	NA	NA	NA	NA	NA	NA	NA	NA	NA	NA	NA	NA	NA	NA	NA	NA
ENSG00000204479	PRAMEF17	protein_coding	human	0	0	0	0	0	0	0	0	0	0	0	0	0	0	0	NA	NA	NA	NA	NA	NA	NA	NA	NA	NA	NA	NA	NA	NA	NA	NA	NA	NA	NA	NA	NA	NA	NA	NA	NA	NA	NA	NA	NA	NA	NA
ENSG00000204478	PRAMEF20	protein_coding	human	0	0	0	0	0	0	0	0	0	0	0	0	0	0	0	NA	NA	NA	NA	NA	NA	NA	NA	NA	NA	NA	NA	NA	NA	NA	NA	NA	NA	NA	NA	NA	NA	NA	NA	NA	NA	NA	NA	NA	NA	NA
ENSG00000162494	LRRC38	protein_coding	human	0	0.0922998	0	0.153878	0	0	0.141911	0.0939515	0	0.085237	0.0788701	0	0.154182	0	0.133614	NA	0.766694	NA	1.03172	NA	NA	0.789963	-0.806158	NA	0.54332	-0.30784	NA	-1.04106	NA	-0.628535	NA	4.0717	NA	4.08047	NA	NA	4.08047	4.07175	NA	4.07162	4.07171	NA	4.08047	NA	4.08047	NA
ENSG00000259961	AL354712.1	lncRNA	human	0	0	0	0	0	0	0	0	0	0	0	0	0	0	0	NA	NA	NA	NA	NA	NA	NA	NA	NA	NA	NA	NA	NA	NA	NA	NA	NA	NA	NA	NA	NA	NA	NA	NA	NA	NA	NA	NA	NA	NA	NA
ENSG00000215909	BRWD1P1	processed_pseudogene	human	0	0	0	0	0	0	0	0	0	0	0	0	0	0	0	NA	NA	NA	NA	NA	NA	NA	NA	NA	NA	NA	NA	NA	NA	NA	NA	NA	NA	NA	NA	NA	NA	NA	NA	NA	NA	NA	NA	NA	NA	NA
ENSG00000162493	PDPN	protein_coding	human	0	0	0	0	0	0	0	0	0	0	0	0	0	0	0	NA	NA	NA	NA	NA	NA	NA	NA	NA	NA	NA	NA	NA	NA	NA	NA	NA	NA	NA	NA	NA	NA	NA	NA	NA	NA	NA	NA	NA	NA	NA
ENSG00000222952	RNA5SP41	rRNA_pseudogene	human	0	0	0	0	0	0	0	0	0	0	0	0	0	0	0	NA	NA	NA	NA	NA	NA	NA	NA	NA	NA	NA	NA	NA	NA	NA	NA	NA	NA	NA	NA	NA	NA	NA	NA	NA	NA	NA	NA	NA	NA	NA
ENSG00000237445	AL359771.1	lncRNA	human	0	0	0	0	0	0	0	0	0	0	0	0	0	0	0	NA	NA	NA	NA	NA	NA	NA	NA	NA	NA	NA	NA	NA	NA	NA	NA	NA	NA	NA	NA	NA	NA	NA	NA	NA	NA	NA	NA	NA	NA	NA
ENSG00000253085	AL359771.2	scaRNA	human	0.136856	0.157235	0.12825	0.146382	0.152193	0.131509	0	0	0	0	0	0	0	0	0	-0.703018	-1.09864	-0.50416	-0.89183	-1.00226	-0.569223	NA	NA	NA	NA	NA	NA	NA	NA	NA	4.08047	4.08047	4.08047	4.08047	4.08047	4.08047	NA	NA	NA	NA	NA	NA	NA	NA	NA	-0.172288
ENSG00000116731	PRDM2	protein_coding	human	1343.61	1633	1306.35	1438.38	1591.42	1351.21	1354.62	1805.33	1225.11	1530.8	1482.33	1224.21	1595.86	1488.41	1351.18	0.0769942	0.233659	0.184537	0.0846381	0.251725	0.214396	0.0248454	0.0190577	0.0294757	0.192484	-0.0479335	0.124019	0.198009	-0.0345834	0.140088	0.0716547	0.0693969	0.0713336	0.0689804	0.0718612	0.0856773	0.0679479	0.0667189	0.0850106	0.0692011	0.0685876	0.0710859	0.0682593	0.0841098	0.08332	1.07452
ENSG00000189337	KAZN	protein_coding	human	199.865	214.729	164.814	201.86	206.595	167.29	214.674	237.191	147.995	227.695	189.843	176.248	222.431	185.043	180.68	0.434618	0.264209	0.104622	0.29155	0.248083	0.080153	-0.126227	-0.0157504	-0.0251756	-0.134305	-0.15882	-0.313561	-0.0125177	-0.166335	-0.202394	0.144179	0.142364	0.16127	0.144805	0.148198	0.169829	0.132232	0.133458	0.17277	0.129521	0.146952	0.149449	0.137068	0.160635	0.158593	3.01442
ENSG00000252151	RNU6-1265P	snRNA	human	0	0	0	0	0	0	0	0	0	0	0	0	0	0	0	NA	NA	NA	NA	NA	NA	NA	NA	NA	NA	NA	NA	NA	NA	NA	NA	NA	NA	NA	NA	NA	NA	NA	NA	NA	NA	NA	NA	NA	NA	NA
ENSG00000231606	AL357873.1	lncRNA	human	0	0	0	0	0	0	0	0	0	0	0	0	0	0	0	NA	NA	NA	NA	NA	NA	NA	NA	NA	NA	NA	NA	NA	NA	NA	NA	NA	NA	NA	NA	NA	NA	NA	NA	NA	NA	NA	NA	NA	NA	NA
ENSG00000234593	KAZN-AS1	lncRNA	human	0	0	0.383058	0	0.310649	0.165113	0	0.32551	0.475727	0	0.40161	0.35144	0.305547	0.437245	0.161583	NA	NA	2.29685	NA	1.75596	1.35433	NA	1.89108	-0.945005	NA	2.43416	2.05276	1.71435	-0.402929	1.29502	NA	NA	3.17859	NA	3.40706	4.08047	NA	3.35115	2.75949	NA	3.10078	3.2177	3.41155	2.86108	4.08047	NA
ENSG00000235829	TBCAP2	processed_pseudogene	human	0	0	0	0	0	0	0	0	0	0	0	0	0	0	0	NA	NA	NA	NA	NA	NA	NA	NA	NA	NA	NA	NA	NA	NA	NA	NA	NA	NA	NA	NA	NA	NA	NA	NA	NA	NA	NA	NA	NA	NA	NA
ENSG00000287756	AL031293.1	lncRNA	human	0	0	0	0	0	0	0	0	0	0	0	0	0	0	0	NA	NA	NA	NA	NA	NA	NA	NA	NA	NA	NA	NA	NA	NA	NA	NA	NA	NA	NA	NA	NA	NA	NA	NA	NA	NA	NA	NA	NA	NA	NA
ENSG00000175147	TMEM51-AS1	lncRNA	human	43.1736	48.3817	43.7964	49.8894	49.401	48.8015	41.941	46.1107	41.398	40.0802	41.0705	36.6755	47.7363	46.8537	47.1282	-0.263251	-0.359283	-0.0204599	-0.0236895	-0.169135	0.218934	0.255651	0.19204	0.239762	-0.0606311	0.340317	0.259756	-0.114388	0.391119	0.254052	0.305504	0.295714	0.302631	0.300775	0.287575	0.292062	0.310913	0.292431	0.298544	0.305727	0.305713	0.31557	0.296899	0.28696	0.301076	-0.861694
ENSG00000171729	TMEM51	protein_coding	human	809.052	907.641	730.595	803.179	893.65	746.192	895.976	1107.01	746.671	999.979	907.866	806.5	987.061	908.438	824.635	0.5883	0.530496	0.503339	0.410487	0.573899	0.498883	-0.160471	0.0438039	-0.00531252	-0.0222473	-0.0256334	-0.0682266	0.194538	-0.0721512	0.0988016	0.0810867	0.0808163	0.0820504	0.0778203	0.0941225	0.103289	0.0705545	0.0848376	0.0986908	0.0742453	0.0756196	0.0762298	0.0838187	0.107391	0.0952667	7.2552
ENSG00000204464	C1orf195	lncRNA	human	0.694396	1.13501	0.201532	0	0	0	0.675499	1.15231	0.175704	1.76915	1.18124	0.776912	0	0	0	3.0647	3.54017	1.41939	NA	NA	NA	-2.97669	-3.57674	-1.02734	0.484766	-2.11496	-1.63325	NA	NA	NA	2.7426	2.15882	4.08047	NA	NA	NA	2.70731	2.12163	4.08047	1.64425	2.03359	2.46664	NA	NA	NA	1.11744
ENSG00000215720	AL035405.1	processed_pseudogene	human	0	0	0	0	0	0	0	0	0	0	0	0	0	0	0	NA	NA	NA	NA	NA	NA	NA	NA	NA	NA	NA	NA	NA	NA	NA	NA	NA	NA	NA	NA	NA	NA	NA	NA	NA	NA	NA	NA	NA	NA	NA
ENSG00000278480	AL391094.1	processed_pseudogene	human	8.09628	7.74254	5.85606	8.88663	9.18481	6.0234	11.0388	11.4868	6.04014	10.1409	7.69316	7.85271	12.3872	9.10207	8.79766	1.10515	0.684223	0.522011	1.14716	1.14292	0.537893	0.0511943	0.463497	0.0117014	-0.390173	-0.159409	-0.566161	0.0337211	-0.603646	-0.5985	0.755528	0.762522	0.884454	0.765742	0.709342	0.872188	0.615081	0.56629	0.809608	0.597029	0.712203	0.71122	0.582623	0.658518	0.715284	1.46275
ENSG00000142621	FHAD1	protein_coding	human	26.0484	20.8067	21.1105	24.9199	21.8809	20.8292	30.0143	22.2966	20.906	26.6025	21.5667	25.5432	26.3108	22.0317	24.5515	0.819552	-0.114339	0.484936	0.579259	0.137967	0.401287	-0.220494	0.255305	-0.0834988	-0.899874	0.600029	-0.31882	-0.410415	0.265261	-0.167945	0.399964	0.431012	0.445353	0.411967	0.415443	0.435891	0.373523	0.407075	0.437703	0.384662	0.434118	0.409171	0.390038	0.411472	0.41091	2.04906
ENSG00000233485	FHAD1-AS1	lncRNA	human	1.17477	0.341835	0.329782	0.146382	0.152193	0.328383	1.01241	0.187903	0.342525	1.24742	0.369677	1.06898	0	0.198997	0.190834	2.68793	0.350879	0.457627	-0.89183	-1.00226	0.392563	-3.56247	-1.33638	-0.0655584	-2.21911	0.102848	-2.21458	NA	1.3971	1.29502	2.04906	3.37306	3.40305	4.08047	4.08047	3.47306	2.1731	4.05592	3.31628	1.92699	3.224	2.0744	NA	4.08047	4.08047	1.31179
ENSG00000236045	AL031283.2	lncRNA	human	0	0	0	0	0	0	0	0	0	0	0	0	0	0	0	NA	NA	NA	NA	NA	NA	NA	NA	NA	NA	NA	NA	NA	NA	NA	NA	NA	NA	NA	NA	NA	NA	NA	NA	NA	NA	NA	NA	NA	NA	NA
ENSG00000228140	AL031283.1	lncRNA	human	12.6016	8.12692	5.40066	10.7735	8.13738	4.38228	17.4488	11.1319	4.47116	15.4571	7.82945	11.5053	13.5675	6.81172	9.09762	2.06628	0.969162	0.45601	1.65623	0.993871	-0.171883	-0.394432	0.0195912	-0.626838	-1.04787	-0.507418	-1.5909	-0.635804	-1.16228	-1.81059	0.630212	0.709481	0.853543	0.623543	0.71779	0.921187	0.487142	0.620505	0.927844	0.53951	0.734999	0.658305	0.548995	0.797363	0.700783	3.2787
ENSG00000142634	EFHD2	protein_coding	human	3785.34	3797.56	2766.48	4063.95	3429.16	2741.61	5068.32	4641.07	2780.56	4899.18	3774.88	3692.76	4841.62	3423.53	3956.66	1.0922	0.795337	0.53279	1.10388	0.634265	0.456431	0.028367	-0.159923	-0.0768139	-0.261315	-0.261179	-0.542928	-0.438247	-0.175605	-0.636671	0.0613516	0.0694777	0.0643605	0.0672215	0.0732376	0.0748235	0.0524423	0.0630042	0.065072	0.0544333	0.0573091	0.0488692	0.0635522	0.0718532	0.0699283	17.8024
ENSG00000162438	CTRC	protein_coding	human	1.39023	1.15365	1.16563	1.72403	2.08046	1.59926	1.67788	1.8563	1.32667	1.15475	0.943159	1.14848	2.3854	2.18456	1.85667	0.225818	-0.975799	-0.0538425	0.617521	0.95535	0.689762	0.407216	1.99674	0.733051	-1.19234	0.91216	-0.255457	0.363256	-0.25833	0.0828253	1.67061	1.96908	1.87816	1.52969	1.42237	1.59639	1.44586	1.59927	1.67419	1.8313	2.0734	1.76643	1.25078	1.31209	1.40311	0.135171
ENSG00000142615	CELA2A	protein_coding	human	0.199599	0	0	0	0	0.211506	0.19321	0	0.181205	0.206365	0	0.169237	0	0.21503	0.207607	1.22054	NA	NA	NA	NA	1.35433	-1.13359	NA	0.896211	-1.32153	NA	-0.746246	NA	1.3971	1.29502	4.08047	NA	NA	NA	NA	4.08047	4.08047	NA	4.08047	4.08047	NA	4.08047	NA	4.08047	4.08047	0.299116
ENSG00000215704	CELA2B	protein_coding	human	0	0	0	0	0	0	0	0	0	0	0	0	0	0	0	NA	NA	NA	NA	NA	NA	NA	NA	NA	NA	NA	NA	NA	NA	NA	NA	NA	NA	NA	NA	NA	NA	NA	NA	NA	NA	NA	NA	NA	NA	NA
ENSG00000132906	CASP9	protein_coding	human	296.639	314.396	317.578	327.235	314.587	332.919	251.753	246.022	278.674	235.066	262.205	248.082	263.558	276.084	287.117	-0.487349	-0.77534	-0.0595807	-0.375837	-0.653813	0.0166808	0.128627	0.122805	0.0750222	-0.253026	0.71862	0.444753	-0.247073	0.673048	0.402988	0.120616	0.119127	0.125545	0.112544	0.119589	0.119248	0.124729	0.131671	0.136764	0.132288	0.137371	0.138855	0.125052	0.12998	0.124344	-4.04052
ENSG00000116138	DNAJC16	protein_coding	human	932.691	1140.75	910.796	998.683	1092.23	945.767	919.466	1222.11	842.969	1046.6	1018.11	835.084	1072.28	1009.33	925.7	0.00977972	0.183501	0.130778	0.0175303	0.156461	0.173385	0.0247588	-0.0257268	0.0420584	0.209368	-0.0514317	0.137628	0.169935	0.0192586	0.166123	0.0747563	0.073222	0.0762252	0.0739235	0.0748352	0.0852434	0.0722548	0.0688786	0.0850257	0.0712984	0.0727824	0.0752485	0.0717911	0.0823967	0.0836927	0.130821
ENSG00000251866	SCARNA21B	scaRNA	human	2.04912	1.70218	0.942403	1.39848	1.41106	1.53258	1.69316	1.31436	0.801787	1.99122	0.845601	1.2141	1.03159	1.20593	1.19735	0.65221	-0.185898	-1.84315	-0.709693	-0.82092	-0.0163463	-1.34162	-0.630827	1.82051	-0.781504	-1.62115	-2.45733	-0.0868378	0.811831	0.705227	1.42683	1.60693	2.22004	1.78386	1.7635	1.70852	1.53174	1.75179	2.27986	1.36689	2.22577	1.90312	1.95029	1.83624	1.85767	0.457105
ENSG00000272510	AL121992.3	lncRNA	human	7.44692	8.38909	6.57158	7.82126	6.74455	6.13997	10.1195	10.4253	7.34245	10.8178	9.70235	8.5736	9.69078	7.79173	8.64824	1.22245	1.14685	1.09784	1.1844	0.7739	0.903533	-0.0219618	-0.363537	-0.198054	-0.0508659	-0.0435804	-0.109601	-0.379504	0.127363	-0.275468	0.735605	0.718196	0.780733	0.722711	0.75755	0.819993	0.588359	0.603703	0.711334	0.583073	0.629394	0.646708	0.607505	0.69149	0.665777	1.66183
ENSG00000116771	AGMAT	protein_coding	human	408.052	432.865	353.166	419.461	402.964	376.534	381.173	382.754	293.4	391.319	336.354	319.346	372.233	333.736	348.781	-0.0257774	-0.276311	-0.262993	-0.135983	-0.391386	-0.133766	-0.093236	-0.114815	0.128763	-0.214576	0.0138604	-0.220434	-0.224447	0.260712	0.0134614	0.104112	0.115094	0.112336	0.104131	0.107049	0.116313	0.105182	0.118263	0.126035	0.115721	0.124709	0.114177	0.108811	0.120359	0.11914	-0.247593
ENSG00000237301	AL121992.1	lncRNA	human	2.63969	4.29596	2.76889	3.09352	4.78666	4.12194	1.65871	4.91774	2.78936	2.67862	2.80124	1.49821	3.66261	4.6218	3.12569	-1.42358	-0.122796	-0.898006	-1.00456	0.2938	0.297095	0.440487	0.427478	1.19685	1.34453	-0.783924	0.542295	1.33455	0.00555625	1.3152	1.2785	0.989166	1.26434	1.16408	0.919531	0.993169	1.4502	0.891417	1.20305	1.22773	1.22268	1.57579	1.05198	0.896057	1.12298	-1.11348
ENSG00000235084	CHCHD2P6	processed_pseudogene	human	1.01703	1.63039	1.99847	1.98696	1.90292	1.58463	1.55961	2.15814	2.04169	1.20947	2.22557	1.59714	2.47615	2.01577	2.06873	-0.787602	0.302609	1.23973	0.972915	0.753374	0.675169	1.76711	0.449895	-0.564231	1.11763	0.936761	2.03553	-0.19646	-0.0723882	-0.288595	2.02407	1.55848	1.45834	1.45649	1.47118	1.61688	1.65665	1.30737	1.35312	1.76814	1.29429	1.66214	1.23299	1.36889	1.36043	-0.389118
ENSG00000252417	RNU7-179P	snRNA	human	0	0	0	0	0	0	0	0	0	0	0	0	0	0	0	NA	NA	NA	NA	NA	NA	NA	NA	NA	NA	NA	NA	NA	NA	NA	NA	NA	NA	NA	NA	NA	NA	NA	NA	NA	NA	NA	NA	NA	NA	NA
ENSG00000236500	CD24P1	processed_pseudogene	human	0	0	0	0	0	0	0	0	0	0	0	0	0	0	0	NA	NA	NA	NA	NA	NA	NA	NA	NA	NA	NA	NA	NA	NA	NA	NA	NA	NA	NA	NA	NA	NA	NA	NA	NA	NA	NA	NA	NA	NA	NA
ENSG00000197312	DDI2	protein_coding	human	1184.36	1591.99	1253.7	1303.05	1479.37	1265.18	1207.25	1804.2	1216.51	1469.89	1524.94	1156.25	1496.36	1435.01	1275.89	0.0275008	0.445403	0.362976	0.112961	0.34543	0.329584	0.102855	-0.0981839	-0.0335585	0.453826	-0.080861	0.352249	0.263621	-0.0134194	0.227367	0.0701569	0.0692537	0.0667302	0.0651689	0.0658023	0.0770664	0.0650156	0.0642819	0.0757765	0.069581	0.066553	0.0674638	0.0617041	0.0735208	0.074712	0.39199
ENSG00000215695	RSC1A1	protein_coding	human	0	0	0	0	0	0	0	0	0	0	0	0	0	0	0	NA	NA	NA	NA	NA	NA	NA	NA	NA	NA	NA	NA	NA	NA	NA	NA	NA	NA	NA	NA	NA	NA	NA	NA	NA	NA	NA	NA	NA	NA	NA
ENSG00000271742	AL121992.2	lncRNA	human	0	0	0	0	0	0.423011	0	0	0.362411	0	0	0	0	0.43006	0.415215	NA	NA	NA	NA	NA	2.37688	NA	NA	1.92511	NA	NA	NA	NA	2.42144	2.32364	NA	NA	NA	NA	NA	3.38103	NA	NA	3.46819	NA	NA	NA	NA	3.28789	3.37483	NA
ENSG00000116786	PLEKHM2	protein_coding	human	1442.03	1638.18	1495.25	1587.43	1603.36	1484.27	1499.46	1717.48	1429.87	1542.37	1596.28	1404.21	1659.18	1546.2	1526.49	0.0863942	0.0580869	0.361967	0.171397	0.0875904	0.285679	0.101906	0.0307197	-0.0771071	0.00732411	0.305257	0.292352	-0.0525441	0.200148	0.124752	0.067512	0.0808435	0.0658131	0.0641885	0.0657777	0.0753572	0.0619848	0.0748554	0.0733675	0.0774812	0.0772614	0.0645252	0.0597924	0.0710782	0.0718331	1.27969
ENSG00000237938	AL450998.3	lncRNA	human	0	0.1846	0.202873	0	0.162733	0.196875	0	0.357522	0.344449	0.170474	0.37069	0.186253	0.159618	0.339878	0.190834	NA	1.29666	1.41939	NA	0.921293	1.35433	NA	-0.394048	-0.0655584	1.07291	0.102733	1.17731	0.88249	0.435331	1.29502	NA	4.05588	4.08047	NA	4.08047	4.08047	NA	3.26893	3.30977	4.05584	3.22089	4.08047	4.08047	3.36081	4.08047	NA
ENSG00000162461	SLC25A34	protein_coding	human	12.4357	18.2543	15.4481	17.5928	15.3922	11.3226	11.5344	14.6907	9.12651	11.7668	14.9639	10.0955	14.2334	8.2492	10.3532	-1.1337	-0.202825	-0.117849	-0.130271	-0.702562	-1.42168	1.02162	-0.496772	-1.3041	0.957645	0.0889225	1.03484	-0.54287	-0.712438	-1.28224	0.592168	0.46055	0.491771	0.472556	0.49669	0.62341	0.607357	0.507791	0.656897	0.595001	0.49807	0.633241	0.518671	0.685387	0.646136	-1.91449
ENSG00000224459	SLC25A34-AS1	lncRNA	human	0.136856	0.357077	0.12825	0.331554	0.482295	0.131509	0.170448	0.551875	0	0.185554	0.17073	0	0.512172	0.288374	0.160598	-0.703018	-0.0344687	-0.50416	0.0699544	0.86149	-0.569223	0.789963	0.923531	NA	0.720002	-0.482655	NA	0.825173	-1.43437	-0.628535	4.08047	3.33558	4.08047	3.41348	2.76144	4.08047	4.08047	2.64382	NA	4.06582	4.06596	NA	2.70046	3.52013	4.08047	-0.172288
ENSG00000162460	TMEM82	protein_coding	human	0.436256	0.502061	0.408123	0.465723	0.48599	0.416896	0	0	0	0	0	0	0	0	0	-2.13544	-2.53462	-1.93613	-2.32455	-2.43835	-2	NA	NA	NA	NA	NA	NA	NA	NA	NA	2.99025	2.87447	3.06688	2.93946	2.86251	3.10213	NA	NA	NA	NA	NA	NA	NA	NA	NA	-0.714135
ENSG00000162458	FBLIM1	protein_coding	human	1015.49	1151.4	955.106	1107.49	1086.54	987.107	1058.44	1176.93	881.912	1097.19	1031.67	909.525	1129.38	1004.77	1020.58	0.122011	0.0869728	0.136681	0.179754	0.0143229	0.166599	0.0742707	-0.0715834	0.0292547	0.000603788	0.0510417	0.0313643	-0.134149	0.15452	-0.00272719	0.0718419	0.0763068	0.0740816	0.0768108	0.0747509	0.0836816	0.0732527	0.0737293	0.0830456	0.0727503	0.0756387	0.0719789	0.0756375	0.0824959	0.0863875	1.69832
ENSG00000224321	RPL12P14	processed_pseudogene	human	0.341366	0.500844	0.158492	0.180913	0.51327	0.767213	0.168454	0.650803	0.514847	0.461522	0.262042	0.146035	0.319236	0.894786	0.589274	0.258769	0.670951	-0.50416	-0.89183	0.849902	1.93668	-1.13359	0.174134	2.44316	0.447823	-1.17722	-0.746246	1.76567	1.08975	2.84123	3.35754	2.774	4.08047	4.08047	2.88622	2.40772	4.08047	2.49851	2.79331	2.75896	3.63044	4.08047	3.64659	2.22089	2.72661	0.0770708
ENSG00000233954	UQCRHL	protein_coding	human	4.66245	6.83322	6.32714	4.9693	6.28687	5.31058	2.42146	5.55477	4.46448	3.97538	5.7626	3.92847	3.76481	4.21969	3.12908	-1.45292	-0.368615	-0.0444656	-1.45712	-0.626203	-0.676734	0.0119991	-0.243485	-0.634939	1.09455	0.330538	1.42884	0.865623	-0.0489549	0.791694	1.01253	0.759865	0.760072	0.914506	0.844385	0.858088	1.30709	0.909551	0.897604	1.07564	0.808743	1.06457	1.08375	1.01235	1.09907	-1.43494
ENSG00000178715	AL450998.1	processed_pseudogene	human	8.16909	8.19161	6.39041	11.3157	9.91634	5.74489	10.888	9.79774	4.22661	8.00354	6.18894	6.26945	12.8336	7.03486	8.30546	0.187415	-0.205156	-0.364092	0.82332	0.424179	-0.808828	0.651207	0.62829	-0.450143	-0.357461	-0.154404	-0.532024	-0.36657	-1.22676	-1.62027	0.673996	0.674784	0.811159	0.587496	0.61058	0.824576	0.587471	0.61513	0.970555	0.668138	0.816747	0.811075	0.538743	0.755725	0.7268	0.278065
ENSG00000179743	AL450998.2	lncRNA	human	48.7416	52.8546	38.9573	53.6459	56.1682	39.8527	55.3561	63.129	33.3251	54.8038	44.34	40.9123	63.1841	48.1505	45.9558	0.377636	0.229899	-0.0627301	0.451787	0.46438	-0.0548543	0.0896985	0.233461	0.00589258	-0.111018	-0.290378	-0.423516	0.04404	-0.517546	-0.496501	0.287445	0.307517	0.332898	0.282892	0.26761	0.324567	0.263687	0.269803	0.348568	0.285133	0.333594	0.313583	0.247995	0.285486	0.301842	1.31377
ENSG00000065526	SPEN	protein_coding	human	4956.77	6046.73	4696.39	5277.03	5475.66	4865.51	5593.31	7009.05	4829.3	6335.01	5982.56	4947.13	6157.23	5641.39	5434.3	0.449445	0.596691	0.481464	0.442797	0.434519	0.514028	0.0109209	-0.160881	0.0316049	0.183211	-0.113695	0.0489798	0.0225762	0.0817398	0.0813417	0.0591935	0.0647716	0.0597588	0.0622574	0.0640952	0.0789727	0.0551847	0.0583895	0.0735661	0.0584264	0.0583847	0.0533729	0.0593336	0.0751234	0.0760579	7.5928
ENSG00000270620	AL034555.1	unprocessed_pseudogene	human	0	0	0	0	0	0	0	0	0	0	0	0	0	0	0	NA	NA	NA	NA	NA	NA	NA	NA	NA	NA	NA	NA	NA	NA	NA	NA	NA	NA	NA	NA	NA	NA	NA	NA	NA	NA	NA	NA	NA	NA	NA
ENSG00000116809	ZBTB17	protein_coding	human	360.002	407.865	403.201	401.095	416.703	396.862	349.941	410.596	381.454	353.232	400.085	352.896	403.333	398.444	383.478	-0.150961	-0.184406	0.35012	-0.0262182	-0.0316039	0.248895	0.141089	0.152156	-0.102521	0.00361255	0.535038	0.517374	0.0261829	0.281927	0.284959	0.11601	0.117878	0.119311	0.117705	0.113167	0.129005	0.110617	0.107479	0.125548	0.110536	0.114479	0.113027	0.108272	0.118803	0.124304	-1.30127
ENSG00000234607	AL355994.4	processed_pseudogene	human	0	0	0	0	0	0	0	0	0	0	0	0	0	0	0	NA	NA	NA	NA	NA	NA	NA	NA	NA	NA	NA	NA	NA	NA	NA	NA	NA	NA	NA	NA	NA	NA	NA	NA	NA	NA	NA	NA	NA	NA	NA
ENSG00000231353	AL355994.1	unprocessed_pseudogene	human	0	0	0	0	0	0	0	0	0	0	0	0	0	0	0	NA	NA	NA	NA	NA	NA	NA	NA	NA	NA	NA	NA	NA	NA	NA	NA	NA	NA	NA	NA	NA	NA	NA	NA	NA	NA	NA	NA	NA	NA	NA
ENSG00000275503	AL355994.5	processed_pseudogene	human	0	0	0	0	0	0	0	0	0	0	0	0	0	0	0	NA	NA	NA	NA	NA	NA	NA	NA	NA	NA	NA	NA	NA	NA	NA	NA	NA	NA	NA	NA	NA	NA	NA	NA	NA	NA	NA	NA	NA	NA	NA
ENSG00000224966	TBC1D3P6	unprocessed_pseudogene	human	0	0	0	0	0	0	0	0	0	0	0	0	0	0	0	NA	NA	NA	NA	NA	NA	NA	NA	NA	NA	NA	NA	NA	NA	NA	NA	NA	NA	NA	NA	NA	NA	NA	NA	NA	NA	NA	NA	NA	NA	NA
ENSG00000183888	SRARP	protein_coding	human	0	0.1846	0	0	0.147916	0.787499	0	0.343794	0.667283	0.170474	0.15774	0	0.145929	0.924988	0.763334	NA	1.29666	NA	NA	0.921293	3.29311	NA	-0.392472	2.82696	1.07291	-0.83787	NA	0.88249	2.3683	3.22491	NA	4.05588	NA	NA	4.08047	2.68195	NA	3.31486	2.75542	4.05584	4.05589	NA	4.08047	2.37641	2.68854	NA
ENSG00000233078	AL355994.3	lncRNA	human	0	0	0	0	0	0	0	0	0	0	0	0	0	0	0	NA	NA	NA	NA	NA	NA	NA	NA	NA	NA	NA	NA	NA	NA	NA	NA	NA	NA	NA	NA	NA	NA	NA	NA	NA	NA	NA	NA	NA	NA	NA
ENSG00000173641	HSPB7	protein_coding	human	0.169606	0.593699	0.361364	0.334792	0.187804	0.161958	0.141911	0.406667	0.177629	0.371108	0.55441	0.186253	0.154182	0	0.133614	-0.703018	1.02163	0.457628	0.0699545	-1.00226	-0.569223	0.789963	-2.04989	-1.02734	1.79266	-0.563983	1.17731	-1.04106	NA	-0.628535	4.08047	2.79728	3.29499	3.40168	4.08047	4.08047	4.08047	3.3502	4.08047	3.39494	2.81546	4.08047	4.08047	NA	4.08047	-0.172288
ENSG00000186510	CLCNKA	protein_coding	human	0.518904	0.366428	0.907046	0.525756	0.862355	0.698401	0.363657	0.531889	0.866528	0.206365	0.638849	0.727997	0.685479	0.839131	0.542265	-0.690347	-2.05461	1.04032	-0.878259	0.533843	0.379131	-0.171807	2.57496	-0.671941	-1.32153	3.08779	1.74135	1.43481	-0.151812	1.25939	2.71189	3.25935	2.23157	2.71539	2.12685	2.4877	3.21152	2.77821	2.36667	4.08047	2.81131	2.52661	2.42662	2.2611	2.87919	-0.254563
ENSG00000232456	AL355994.2	unprocessed_pseudogene	human	2.04415	3.89792	2.69158	3.61022	2.99989	3.46976	1.70909	2.81068	2.2962	1.8539	2.53608	1.05753	2.58641	2.55628	3.08871	-3.23708	-0.207027	-0.824236	-0.235685	-1.07778	-0.0397152	3.0088	-0.863746	0.782694	3.04744	-0.606495	2.42599	-0.810544	1.0421	0.206917	1.65787	0.971525	1.18492	1.02243	1.12132	1.03642	1.73563	1.14789	1.2511	1.67418	1.20352	1.98762	1.20155	1.20198	1.10399	-1.95256
ENSG00000184908	CLCNKB	protein_coding	human	1.9156	2.46793	1.32442	1.63679	1.49562	1.83874	1.02841	1.27909	0.768285	1.75331	1.14492	0.79533	0.518451	0.841975	0.985367	-0.739091	-0.368544	-2.42539	-1.88986	-2.92406	-0.673111	-1.12637	-2.56833	1.72616	0.412971	-2.07111	-1.66776	-1.02689	2.22729	1.19518	1.37283	1.21698	1.85086	1.63548	1.79302	1.46721	1.88828	1.8931	2.32467	1.41526	1.94097	2.16926	2.68932	2.28398	2.05299	-0.538372
ENSG00000185519	FAM131C	protein_coding	human	269.877	281.376	218.767	292.732	287.483	233.96	309.585	321.878	204.427	300.712	246.22	235.49	330.257	266.615	270.468	0.451849	0.197895	0.0724176	0.492043	0.345982	0.195479	0.0572091	0.149033	0.122417	-0.218824	-0.124204	-0.362566	-0.114904	-0.147629	-0.286051	0.126228	0.134186	0.139813	0.120741	0.129166	0.143158	0.112485	0.127777	0.148209	0.125002	0.139916	0.132243	0.116432	0.137964	0.131087	3.57963
ENSG00000142627	EPHA2	protein_coding	human	5709.2	6729.54	6031.83	6468.41	6417.16	6081.84	6601.01	7710.83	6346.78	6862.84	7141.51	6094.16	7369.87	6880.28	6874.37	0.344341	0.411017	0.644891	0.494132	0.37309	0.611831	0.166476	-0.0365538	-0.0335388	0.102448	0.235085	0.317221	-0.0896966	0.240946	0.128377	0.053428	0.0626419	0.0514627	0.0570258	0.0575349	0.0645002	0.0505523	0.057401	0.0596661	0.0564365	0.055364	0.0453384	0.0542775	0.0626283	0.0651701	6.44495
ENSG00000227959	AL451042.2	lncRNA	human	8.20152	7.78468	5.75836	8.82856	8.74898	7.47142	10.8467	10.8273	7.00519	10.0507	7.41168	7.65574	11.6527	9.97803	9.95006	1.05529	0.640221	0.39694	1.08559	0.973996	0.970923	0.0525843	0.326467	0.571135	-0.375272	-0.236225	-0.634465	-0.0876754	0.0117909	-0.101347	0.732305	0.753725	0.848128	0.750076	0.695891	0.779696	0.633143	0.597915	0.753855	0.622711	0.732904	0.715886	0.606294	0.627803	0.684264	1.44106
ENSG00000224621	AL451042.1	lncRNA	human	6.52482	5.58001	3.51196	5.40682	4.98739	2.57935	7.67204	6.53462	2.20482	7.9889	4.77034	5.56266	6.27875	3.32308	3.72224	1.33832	0.719145	0.0152856	0.784739	0.505591	-1.20652	-0.538013	-0.21698	-1.21881	-0.573508	-0.694879	-1.29979	-0.246774	-1.703	-1.97698	0.7893	0.846529	1.05162	0.842391	0.865392	1.27139	0.681584	0.751984	1.33587	0.677344	0.918477	0.858746	0.750556	1.14413	1.11427	1.69558
ENSG00000234166	ARHGEF19-AS1	lncRNA	human	0	0	0	0	0	0	0	0	0	0	0	0	0	0	0	NA	NA	NA	NA	NA	NA	NA	NA	NA	NA	NA	NA	NA	NA	NA	NA	NA	NA	NA	NA	NA	NA	NA	NA	NA	NA	NA	NA	NA	NA	NA
ENSG00000142632	ARHGEF19	protein_coding	human	165.881	185.518	161.779	176.178	185.081	163.206	143.778	168.212	130.123	150.392	147.624	132.289	159.866	148.266	140.983	-0.318206	-0.385202	-0.188258	-0.335716	-0.304025	-0.233084	-0.000279682	0.0807655	-0.0458876	-0.0324786	0.198492	0.146688	0.0626651	0.0735428	0.11282	0.169083	0.168784	0.164426	0.158666	0.155773	0.178541	0.166892	0.165752	0.181177	0.176922	0.174092	0.17451	0.155471	0.174141	0.177667	-1.88195
ENSG00000237276	ANO7L1	transcribed_unprocessed_pseudogene	human	9.91506	14.364	13.9812	13.6579	18.6978	13.2973	6.86388	15.9086	10.7131	7.0846	11.5304	7.84663	15.1148	14.5297	10.2111	-1.96494	-0.703975	-0.157823	-0.680391	0.182711	-0.378159	1.3028	0.880231	-0.221458	1.27757	0.549929	1.82668	0.895301	-0.557537	0.311726	0.712555	0.558358	0.535088	0.554135	0.472346	0.567235	0.773637	0.515224	0.583559	0.781428	0.582435	0.739013	0.512382	0.524171	0.615571	-2.7576
ENSG00000288398	AL109627.1	lncRNA	human	153.738	199.955	170.274	150.539	194.912	169.957	114.111	200.056	148.136	157.34	174.652	134.84	150.204	169.394	130.836	-0.46319	-0.0693631	0.0579392	-0.779476	-0.0471894	-0.00763281	-0.299491	0.0234328	-0.0669587	0.429817	0.128217	0.538088	0.763711	0.0413045	0.781837	0.160996	0.144659	0.156912	0.163968	0.144585	0.167192	0.177087	0.13978	0.173517	0.154873	0.152434	0.169374	0.159897	0.162117	0.182424	-2.87702
ENSG00000132881	CPLANE2	protein_coding	human	72.3535	94.2866	84.0928	80.0098	100.502	82.6716	59.4301	100.367	73.2156	71.3082	83.7649	64.6997	85.5474	87.4339	69.5962	-0.576989	-0.164058	0.104726	-0.457157	0.118974	-0.0131885	0.136572	0.284768	-0.117501	0.449323	0.269505	0.698098	0.608181	-0.130222	0.455593	0.230066	0.203547	0.215323	0.222852	0.203994	0.225832	0.249971	0.205322	0.236199	0.228234	0.215253	0.241655	0.223877	0.227278	0.24705	-2.50793
ENSG00000233929	MT1XP1	processed_pseudogene	human	3.22927	3.15295	2.96774	4.16871	3.90637	2.67387	4.355	4.17896	2.68127	3.44484	3.17127	3.17182	5.12654	3.5139	3.73463	0.464578	0.0169955	0.451442	0.920241	0.694413	0.0825527	0.480061	0.692566	-0.365105	-0.411661	0.438203	0.00458688	-0.192535	-0.613441	-0.83101	1.12066	1.0993	1.14229	0.980889	0.985452	1.28639	0.949273	0.938761	1.25292	1.04965	1.08281	1.11033	0.842738	1.09894	1.09586	0.414557
ENSG00000037637	FBXO42	protein_coding	human	598.425	729.612	596.14	629.13	700.11	608.208	558.038	755.859	534.667	646.763	642.468	528.221	652.191	627.469	565.038	-0.0953809	0.0747626	0.0849184	-0.143343	0.0532602	0.080379	-0.0310298	-0.0200797	-0.00558913	0.20571	0.011376	0.196973	0.227737	0.0292253	0.233576	0.0930449	0.0883787	0.0941016	0.0892189	0.0905069	0.104705	0.0867344	0.0811986	0.102797	0.085682	0.0871289	0.0929122	0.0837354	0.0983158	0.0986018	-1.02511
ENSG00000055070	SZRD1	protein_coding	human	4357.18	4642.24	3637.15	4652.37	4484.25	3699.62	4762.74	4932.48	3186.46	4767.29	4001.89	3752.28	4917.19	3923.03	4067.83	0.335152	0.134284	0.0256893	0.33572	0.129646	0.0119723	0.017943	-0.0032073	-0.014346	-0.165429	-0.107208	-0.292835	-0.174997	-0.115422	-0.313146	0.05865	0.0677134	0.0661044	0.0548584	0.066371	0.0705673	0.0403709	0.0589001	0.0694363	0.0557315	0.0636739	0.0554866	0.0486957	0.0648437	0.0566715	5.71444
ENSG00000226457	RPL22P3	processed_pseudogene	human	0.1497	0.172413	0.139937	0.15967	0.166899	0.142694	0	0	0	0	0	0	0	0	0	-0.703018	-1.09864	-0.50416	-0.89183	-1.00226	-0.569223	NA	NA	NA	NA	NA	NA	NA	NA	NA	4.08047	4.08047	4.08047	4.08047	4.08047	4.08047	NA	NA	NA	NA	NA	NA	NA	NA	NA	-0.172288
ENSG00000187144	SPATA21	protein_coding	human	2.699	2.26858	2.4826	1.98913	2.13162	1.7312	2.08885	1.71249	1.66643	2.35234	2.16455	2.50255	1.4695	1.26203	1.16402	0.281726	-0.659377	0.257685	-0.912162	-0.754069	-1.02069	-1.17914	-0.102044	-1.27826	-0.904168	0.916206	-0.00716714	0.179589	-0.254856	-0.101473	1.1745	1.32212	1.19636	1.37446	1.34743	1.49613	1.34784	1.54838	1.48622	1.29121	1.32942	1.19292	1.59157	1.72229	1.73363	0.239869
ENSG00000157191	NECAP2	protein_coding	human	786.838	897.662	716.235	807.889	858.814	771.197	794.747	960.434	685.492	877.787	800.174	701.17	864.685	820.523	773.397	0.201714	0.185219	0.127501	0.0961269	0.152938	0.266996	-0.088163	-0.0313185	0.139116	0.0191815	-0.0562757	-0.0574347	0.0875779	0.116653	0.181651	0.0820382	0.0790363	0.0855785	0.0825157	0.0815789	0.0907194	0.0789861	0.0741417	0.0915424	0.0759559	0.0801252	0.0833743	0.0792437	0.0869077	0.0896946	2.45879
ENSG00000226029	LINC01772	lncRNA	human	17.8367	24.2556	18.6277	20.761	20.8743	23.827	17.7409	24.2305	20.9226	20.8142	21.4539	15.8779	20.6518	23.7528	23.4322	-0.209173	0.286398	0.112574	0.0425839	-0.0452998	0.682442	0.267316	-0.330033	0.568009	0.529404	-0.170681	0.337629	-0.0557053	0.729487	0.651556	0.510314	0.438376	0.515974	0.464669	0.473067	0.449932	0.455711	0.401811	0.446426	0.42822	0.439444	0.510591	0.427092	0.410702	0.402974	-0.40989
ENSG00000080947	CROCCP3	transcribed_unprocessed_pseudogene	human	94.5486	153.782	116.82	102.606	146.343	114.222	63.7135	163.509	96.7971	108.418	130.666	80.306	111.189	121.509	83.6527	-0.984485	0.183819	-0.0249524	-0.920289	0.125804	-0.160292	0.0819661	-0.0602583	-0.136594	1.20431	-0.210384	0.976241	1.0782	-0.285291	0.771621	0.238291	0.196623	0.215173	0.245796	0.197376	0.224622	0.267376	0.169059	0.210919	0.204633	0.185164	0.22832	0.217814	0.195159	0.247613	-4.13144
ENSG00000206652	RNU1-1	snRNA	human	6.23178	6.15692	8.30006	6.24448	7.35755	5.3498	6.65319	7.81693	7.49116	6.59947	8.77517	8.40136	7.79676	6.70983	5.72427	0.428724	0.0136935	1.21802	0.256596	0.553139	0.14704	-0.15734	0.543539	-1.07508	-0.381426	1.2101	0.806943	0.329107	-0.408051	-0.100368	0.78525	0.810258	0.700244	0.78793	0.762095	0.856693	0.722435	0.728785	0.706297	0.737225	0.664763	0.654809	0.711982	0.773353	0.797677	0.545971
ENSG00000261135	AL137802.2	lncRNA	human	2.67483	3.87408	2.43753	1.98959	2.83657	2.21565	1.77933	3.75432	1.80655	3.51022	3.20723	2.1948	1.85672	2.09092	1.37035	-0.0623472	0.550459	-0.119726	-1.4662	-0.190851	-0.482192	-1.38326	-0.741854	-0.361075	0.656351	-0.670845	-0.0414436	1.30848	-0.289787	0.981738	1.22431	0.985246	1.2053	1.45662	1.11663	1.34261	1.58449	0.996486	1.43003	1.07155	1.07852	1.3238	1.475	1.35345	1.76799	-0.0509244
ENSG00000285853	AL137802.3	lncRNA	human	0.862481	0.0922998	0.966308	0.153878	0	0	0.985023	0.0939515	0.842676	0.979924	1.09301	1.62194	0.154182	0	0.133614	3.3811	0.766694	3.62925	1.03172	NA	NA	-2.34012	-0.806158	-3.23635	-2.56692	2.84443	0.252194	-1.04106	NA	-0.628535	2.33244	4.0717	2.12568	4.08047	NA	NA	2.11648	4.07175	2.1882	2.09711	1.96549	1.50033	4.08047	NA	4.08047	1.4496
ENSG00000224174	AL137802.1	lncRNA	human	0	0	0	0	0	0	0	0	0	0	0	0	0	0	0	NA	NA	NA	NA	NA	NA	NA	NA	NA	NA	NA	NA	NA	NA	NA	NA	NA	NA	NA	NA	NA	NA	NA	NA	NA	NA	NA	NA	NA	NA	NA
ENSG00000233421	LINC01783	lncRNA	human	15.1915	21.2867	17.8201	19.1755	21.0098	16.1543	14.1017	21.768	14.0157	15.733	18.4574	13.2396	19.5971	16.4682	14.9588	-0.682112	-0.0562221	0.0286242	-0.138969	0.00772246	-0.316585	0.559544	0.0608887	-0.346955	0.664577	0.0845454	0.731166	0.177119	-0.322996	-0.166689	0.53007	0.424172	0.46577	0.452011	0.456147	0.539155	0.544015	0.446308	0.565257	0.510796	0.454204	0.561076	0.474116	0.558731	0.559926	-1.28683
ENSG00000277344	RNU1-6P	snRNA	human	0	0	0	0	0	0	0	0	0	0	0	0	0	0	0	NA	NA	NA	NA	NA	NA	NA	NA	NA	NA	NA	NA	NA	NA	NA	NA	NA	NA	NA	NA	NA	NA	NA	NA	NA	NA	NA	NA	NA	NA	NA
ENSG00000225710	AL355149.1	unprocessed_pseudogene	human	0	0	0	0	0	0	0	0	0	0	0	0	0	0	0	NA	NA	NA	NA	NA	NA	NA	NA	NA	NA	NA	NA	NA	NA	NA	NA	NA	NA	NA	NA	NA	NA	NA	NA	NA	NA	NA	NA	NA	NA	NA
ENSG00000219481	NBPF1	protein_coding	human	984.641	1120.12	956.614	1074.61	1083.41	1000	967.037	1105.29	868.469	1003.2	975.587	857.653	1059.24	984.663	975.251	-0.0578153	-0.0826344	0.0520842	0.00746921	-0.0862214	0.11433	0.0826412	-0.00230423	0.0615845	0.0110618	0.135994	0.126709	-0.0624842	0.202808	0.117407	0.0758535	0.0727681	0.0751637	0.069286	0.0741037	0.084788	0.068583	0.0707706	0.0842609	0.0727149	0.0726528	0.0757659	0.068206	0.0830023	0.0789245	-0.762197
ENSG00000271732	AL137798.1	lncRNA	human	0.169606	0.194015	0.158492	0.180913	0.187804	0.161958	0	0	0	0	0	0	0	0	0	-0.703018	-1.09864	-0.50416	-0.89183	-1.00226	-0.569223	NA	NA	NA	NA	NA	NA	NA	NA	NA	4.08047	4.08047	4.08047	4.08047	4.08047	4.08047	NA	NA	NA	NA	NA	NA	NA	NA	NA	-0.172288
ENSG00000215908	CROCCP2	transcribed_unprocessed_pseudogene	human	501.136	672.324	555.448	553.973	662.363	530.516	404.23	670.69	441.427	503.95	561.175	417.03	551.108	526.222	433.661	-0.621109	-0.101341	-0.0674439	-0.499738	-0.0563534	-0.278571	0.13727	0.0442083	-0.21221	0.55687	0.032696	0.569906	0.474452	-0.219969	0.231659	0.123338	0.121284	0.117124	0.119682	0.117826	0.132011	0.108155	0.10488	0.11157	0.108877	0.103179	0.104067	0.102694	0.114233	0.116341	-5.03582
ENSG00000283773	AL137798.3	transcribed_unprocessed_pseudogene	human	0	0	0	0	0	0	0	0	0	0	0	0	0	0	0	NA	NA	NA	NA	NA	NA	NA	NA	NA	NA	NA	NA	NA	NA	NA	NA	NA	NA	NA	NA	NA	NA	NA	NA	NA	NA	NA	NA	NA	NA	NA
ENSG00000186301	MST1P2	unprocessed_pseudogene	human	24.4536	30.0036	30.9523	27.399	32.735	29.5899	9.18703	17.3729	18.9945	10.3643	18.1421	14.4036	15.6407	19.0428	14.7593	-2.34353	-1.82655	-0.687377	-1.95753	-1.16877	-0.95826	0.397551	0.659714	-0.271424	0.549609	1.14127	1.6729	0.820515	0.213481	1.01125	0.496857	0.407399	0.372483	0.453173	0.382472	0.39202	0.713334	0.492666	0.436795	0.645498	0.464781	0.565269	0.546897	0.460691	0.550301	-4.71671
ENSG00000282143	AL137798.2	lncRNA	human	0	0	0	0	0	0	0	0	0	0	0	0	0	0	0	NA	NA	NA	NA	NA	NA	NA	NA	NA	NA	NA	NA	NA	NA	NA	NA	NA	NA	NA	NA	NA	NA	NA	NA	NA	NA	NA	NA	NA	NA	NA
ENSG00000207513	RNU1-3	snRNA	human	0.171761	0	0	0.555516	0.182186	0.558863	0.679797	0.19265	0.47492	0.178107	0	0.146035	0.737795	0.724736	1.02504	1.22054	NA	NA	2.61822	0.921293	2.81089	1.40339	1.0595	2.34789	-1.32153	NA	-0.746246	-1.65518	1.89176	0.221047	4.08047	NA	NA	2.99802	4.08047	2.79623	2.57028	4.08047	2.86976	4.08047	NA	4.08047	2.53349	2.40574	2.10901	0.299116
ENSG00000280114	AL021920.2	unprocessed_pseudogene	human	0	0	0	0.185172	0	0	0.170448	0	0	0	0	0	0.185776	0	0.160598	NA	NA	NA	1.03172	NA	NA	0.789963	NA	NA	NA	NA	NA	-1.04106	NA	-0.628535	NA	NA	NA	4.08047	NA	NA	4.08047	NA	NA	NA	NA	NA	4.08047	NA	4.08047	NA
ENSG00000236698	EIF1AXP1	processed_pseudogene	human	70.6578	81.2387	61.4092	80.7259	83.2318	66.9427	75.0067	88.6138	53.7879	75.2201	65.4078	56.8699	87.5261	72.7683	70.5713	0.0451122	0.0446809	-0.174793	0.227132	0.202175	0.0218642	0.197564	0.157962	0.196123	0.0339088	-0.217636	-0.203477	0.00585542	-0.176457	-0.193423	0.243021	0.218824	0.252839	0.217698	0.220482	0.254714	0.230799	0.211954	0.277889	0.231333	0.24366	0.268553	0.21157	0.246923	0.245455	0.185631
ENSG00000268869	ESPNP	transcribed_unprocessed_pseudogene	human	0.171761	0	0	0	0	0	0.168454	0	0	0.178107	0	0.146035	0	0	0	1.22054	NA	NA	NA	NA	NA	-1.13359	NA	NA	-1.32153	NA	-0.746246	NA	NA	NA	4.08047	NA	NA	NA	NA	NA	4.08047	NA	NA	4.08047	NA	4.08047	NA	NA	NA	0.299116
ENSG00000279151	AL021920.1	lncRNA	human	0	0	0	0	0	0	0	0	0	0	0	0	0	0	0	NA	NA	NA	NA	NA	NA	NA	NA	NA	NA	NA	NA	NA	NA	NA	NA	NA	NA	NA	NA	NA	NA	NA	NA	NA	NA	NA	NA	NA	NA	NA
ENSG00000282740	AL021920.3	lncRNA	human	0	0	0	0	0	0	0	0	0	0	0	0	0	0	0	NA	NA	NA	NA	NA	NA	NA	NA	NA	NA	NA	NA	NA	NA	NA	NA	NA	NA	NA	NA	NA	NA	NA	NA	NA	NA	NA	NA	NA	NA	NA
ENSG00000058453	CROCC	protein_coding	human	196.035	269.179	212.721	234.153	235.435	204.742	172.528	241.672	164.906	201.021	218.313	157.469	207.846	180.705	180.443	-0.647972	-0.0603494	-0.153563	-0.260267	-0.37573	-0.342957	0.403995	-0.3138	-0.190571	0.622997	-0.0917397	0.511428	-0.0842828	0.0352036	-0.0715947	0.15175	0.130837	0.146999	0.141386	0.137779	0.158122	0.156177	0.132062	0.166958	0.143924	0.140966	0.162827	0.143391	0.159323	0.163112	-4.27001
ENSG00000227684	CROCCP4	transcribed_unprocessed_pseudogene	human	0.169606	0.194015	0.158492	0.180913	0.187804	0.373464	0	0	0.181205	0	0	0	0	0.21503	0.207607	-0.703018	-1.09864	-0.50416	-0.89183	-1.00226	0.392565	NA	NA	0.896211	NA	NA	NA	NA	1.3971	1.29502	4.08047	4.08047	4.08047	4.08047	4.08047	3.31781	NA	NA	4.08047	NA	NA	NA	NA	4.08047	4.08047	-0.172288
ENSG00000207389	RNU1-4	snRNA	human	0	0	0	0	0	0	0	0	0	0	0	0	0	0	0	NA	NA	NA	NA	NA	NA	NA	NA	NA	NA	NA	NA	NA	NA	NA	NA	NA	NA	NA	NA	NA	NA	NA	NA	NA	NA	NA	NA	NA	NA	NA
ENSG00000186715	MST1L	transcribed_unprocessed_pseudogene	human	5.20546	5.03502	3.89211	4.19289	5.73647	4.25941	2.43568	3.40127	1.614	3.08843	1.87568	2.32698	2.67539	2.88435	1.62285	-0.842437	-1.67101	-1.98923	-2.40669	-0.824295	-1.51223	-1.56187	0.834311	0.452211	-0.794213	-0.329571	-1.1395	1.60934	-0.683055	0.901322	0.877721	0.948611	1.12172	1.09736	0.812132	1.02963	1.31671	1.10718	1.60796	1.15919	1.53502	1.35149	1.26223	1.1856	1.61542	-0.9598
ENSG00000223643	BX284668.1	lncRNA	human	0	0	0	0	0	0	0	0	0	0	0	0	0	0	0	NA	NA	NA	NA	NA	NA	NA	NA	NA	NA	NA	NA	NA	NA	NA	NA	NA	NA	NA	NA	NA	NA	NA	NA	NA	NA	NA	NA	NA	NA	NA
ENSG00000230239	BX284668.3	unprocessed_pseudogene	human	0	0	0	0	0	0	0	0	0	0	0	0	0	0	0	NA	NA	NA	NA	NA	NA	NA	NA	NA	NA	NA	NA	NA	NA	NA	NA	NA	NA	NA	NA	NA	NA	NA	NA	NA	NA	NA	NA	NA	NA	NA
ENSG00000263811	MIR3675	miRNA	human	0	0	0	0	0	0	0	0	0	0	0	0	0	0	0	NA	NA	NA	NA	NA	NA	NA	NA	NA	NA	NA	NA	NA	NA	NA	NA	NA	NA	NA	NA	NA	NA	NA	NA	NA	NA	NA	NA	NA	NA	NA
ENSG00000228549	BX284668.2	lncRNA	human	20.1526	20.8156	21.9466	19.9629	23.969	16.4049	17.1255	21.3989	15.71	17.7182	19.846	19.0372	20.5142	16.8058	13.476	-0.169004	-0.492482	0.252102	-0.423149	0.0228062	-0.739419	-0.237688	0.514958	-0.991508	-0.289746	0.749006	0.439386	0.47817	-0.761353	-0.305149	0.43766	0.434386	0.429774	0.435289	0.389025	0.501559	0.467682	0.421732	0.52101	0.465605	0.459991	0.464301	0.422941	0.487137	0.54255	-0.386155
ENSG00000277234	RNU1-5P	snRNA	human	0	0	0	0	0	0	0	0	0	0	0	0	0	0	0	NA	NA	NA	NA	NA	NA	NA	NA	NA	NA	NA	NA	NA	NA	NA	NA	NA	NA	NA	NA	NA	NA	NA	NA	NA	NA	NA	NA	NA	NA	NA
ENSG00000238142	BX284668.5	lncRNA	human	74.4248	95.0196	79.4856	79.1993	91.3506	81.0532	56.0065	85.8562	63.905	69.0932	74.8527	58.1148	70.4916	73.1456	62.8394	-0.669642	-0.294817	-0.221851	-0.68439	-0.325576	-0.228326	0.00179647	-0.0296199	-0.00709636	0.409007	0.0761309	0.46501	0.389759	0.099947	0.467156	0.239368	0.211112	0.232146	0.221526	0.204073	0.225886	0.263387	0.216593	0.257523	0.249609	0.244262	0.273565	0.228074	0.230696	0.25002	-2.79754
ENSG00000235241	BX284668.4	processed_pseudogene	human	0.347198	0.0922998	0	0	0	0.196875	0.337749	0.0939515	0.166821	0.445602	0.0788701	0.29554	0	0.198997	0.190834	2.06543	0.766694	NA	NA	NA	1.35433	-1.97747	-0.806158	0.896211	-1.2636	-0.30784	-1.59224	NA	1.3971	1.29502	3.56916	4.0717	NA	NA	NA	4.08047	3.51906	4.07175	4.08047	2.95868	4.07171	3.72866	NA	4.08047	4.08047	0.578687
ENSG00000207005	RNU1-2	snRNA	human	12.4653	18.6798	16.4017	16.5945	19.8609	15.9139	12.7398	22.3371	15.6456	14.4449	18.4367	12.8303	19.973	18.8893	15.9855	-0.610971	0.215222	0.411632	0.0985148	0.457595	0.277518	0.72716	0.244163	-0.134221	0.864699	0.197223	1.04062	0.390765	-0.178518	0.19088	0.550425	0.445455	0.475062	0.47324	0.430005	0.492433	0.541331	0.404487	0.488834	0.510493	0.446399	0.544538	0.430401	0.449196	0.492301	-1.11
ENSG00000272426	BX284668.6	lncRNA	human	2.23367	3.85758	2.93772	2.34244	4.26715	4.10284	0.63779	3.99619	2.98672	1.91851	2.67117	1.36704	2.46546	4.22154	2.53293	-2.39805	-0.32103	-0.579068	-2.57837	0.0582499	0.325381	-0.167066	0.376927	0.910945	2.09631	-0.250218	1.83748	2.66082	0.271563	2.92991	1.55783	0.996523	1.15172	1.51102	0.941398	1.12147	2.4714	0.952601	1.27062	1.57699	1.16564	1.78855	1.46185	1.07052	1.62631	-1.53935
ENSG00000117122	MFAP2	protein_coding	human	0.336455	0.157235	0.12825	0.30026	0.314925	0.131509	0.335121	0.169619	0	0.206365	0	0.169237	0.3138	0.14088	0.133614	0.258768	-1.09864	-0.50416	0.0699537	-0.0404759	-0.569223	-0.171807	1.0595	NA	-1.32153	NA	-0.746246	-0.07928	-0.526457	-0.628535	3.37481	4.08047	4.08047	3.53761	3.43647	4.08047	3.3039	4.08047	NA	4.08047	NA	4.08047	3.42486	4.08047	4.08047	0.0766765
ENSG00000286898	AL049569.2	lncRNA	human	0.169606	0.194015	0.158492	0.180913	0.187804	0.161958	0	0	0	0	0	0	0	0	0	-0.703018	-1.09864	-0.50416	-0.89183	-1.00226	-0.569223	NA	NA	NA	NA	NA	NA	NA	NA	NA	4.08047	4.08047	4.08047	4.08047	4.08047	4.08047	NA	NA	NA	NA	NA	NA	NA	NA	NA	-0.172288
ENSG00000226526	AL049569.1	lncRNA	human	0.136856	0.464064	0.691493	0.471898	0.497111	0.328383	0.300881	0.673834	0.658089	0.283414	0.852313	0.516627	0.667325	0.499253	0.473635	-0.703018	0.671345	1.90005	0.921838	0.908789	0.392563	1.63829	0.233665	-1.50733	1.41273	1.2365	2.61437	0.00429067	-0.513488	-0.519092	4.08047	2.8404	2.44176	2.80958	2.73479	3.47306	3.3856	2.3477	2.45224	3.45874	2.14104	2.77014	2.3389	2.74275	2.81977	-0.172288
ENSG00000159363	ATP13A2	protein_coding	human	1065.44	1256.57	991.07	1139.93	1220.44	1042.04	981.152	1238.68	830.209	1079.2	1003.06	849.014	1121.43	1022.83	954.215	-0.179523	-0.0964437	-0.198308	-0.173511	-0.0887666	-0.112052	0.022645	0.00837541	0.0848098	0.119131	-0.100438	-0.00210469	0.11607	-0.0214653	0.0713048	0.0720745	0.0744634	0.0797491	0.0715059	0.071768	0.0935949	0.0691831	0.0689744	0.098058	0.0711792	0.0796269	0.0785923	0.0678454	0.0896233	0.0907056	-2.4908
ENSG00000117118	SDHB	protein_coding	human	1896.12	1991.08	1546.1	1909.59	1959.95	1669.45	1889	2033.32	1340.68	1964.6	1600.39	1531.46	1946.75	1698.21	1654.73	0.214783	-0.0383087	-0.179672	0.053951	0.0129213	-0.0156753	-0.144394	0.0533573	0.163421	-0.218563	-0.139304	-0.37815	-0.00960044	-0.0264999	-0.0591022	0.0758947	0.0806745	0.0791515	0.0725683	0.0809839	0.0853297	0.0568094	0.0671654	0.0746533	0.0657617	0.0691047	0.0649216	0.0610319	0.0743118	0.0682278	2.83002
ENSG00000117115	PADI2	protein_coding	human	237.48	225.155	184.474	242.604	225.368	188.884	275.728	251.865	172.633	262.214	206.211	214.801	267.304	210.296	224.65	0.672139	0.198522	0.206043	0.567323	0.280673	0.207604	-0.0878847	0.0817034	0.0003331	-0.435983	0.00820475	-0.449441	-0.255237	-0.071315	-0.350122	0.134502	0.140964	0.149441	0.133501	0.138416	0.164628	0.118255	0.12854	0.1626	0.124505	0.140233	0.134653	0.122635	0.152508	0.148862	4.99725
ENSG00000204362	LINC02783	lncRNA	human	3.46591	5.38559	3.04909	4.55972	5.44787	3.97308	3.26866	6.06949	2.46022	3.9525	3.48037	1.98363	5.18391	4.51464	3.7435	-0.784187	0.226255	-1.05487	-0.0718868	0.303979	-0.145561	0.725229	0.0768549	0.90179	1.0399	-1.27094	-0.251796	0.408721	-0.448428	-0.0625431	1.09041	0.879082	1.20162	0.946399	0.902531	1.02415	1.04352	0.808544	1.23279	0.969764	1.08878	1.33242	0.871232	0.942885	0.988299	-0.719166
ENSG00000282843	AL590644.1	lncRNA	human	0	0	0.383058	0	0	0	0	0	0.334448	0	0.40161	0.35144	0	0	0	NA	NA	2.29685	NA	NA	NA	NA	NA	-1.90509	NA	2.43416	2.05276	NA	NA	NA	NA	NA	3.17859	NA	NA	NA	NA	NA	3.29573	NA	3.10078	3.2177	NA	NA	NA	NA
ENSG00000142623	PADI1	protein_coding	human	73.9218	76.8483	58.8058	84.5209	82.0735	63.2414	84.8649	86.7318	51.0229	77.9163	62.085	59.9991	93.7285	71.1801	73.2957	0.29583	0.0209733	-0.163493	0.470947	0.287946	-0.0205287	0.191402	0.267837	0.144067	-0.239554	-0.182746	-0.442061	-0.152271	-0.306628	-0.479763	0.229783	0.226822	0.27102	0.21853	0.219046	0.266146	0.210618	0.209401	0.298826	0.216774	0.259634	0.262273	0.202873	0.247741	0.248378	1.28743
ENSG00000142619	PADI3	protein_coding	human	79.6075	76.2129	66.5594	87.7966	74.0509	69.857	94.3861	78.8548	64.256	84.3023	70.7026	72.8505	90.2102	71.8773	83.5286	0.517208	0.0337199	0.230678	0.591802	0.0542946	0.304907	0.091276	0.0219357	0.074248	-0.448409	0.198143	-0.269952	-0.506226	0.253532	-0.276094	0.220535	0.226038	0.235873	0.22005	0.227947	0.241789	0.209162	0.223532	0.245057	0.213109	0.230794	0.226228	0.218123	0.239096	0.232987	2.34524
ENSG00000266634	MIR3972	miRNA	human	0.171761	0.0922998	0	0.492929	0.147916	0.40838	0.622724	0.249842	0.348026	0.263344	0.0788701	0.146035	0.640069	0.543026	0.826267	1.22054	0.766694	NA	2.47314	0.921293	2.33205	1.2711	0.154231	1.87355	-0.416287	-0.30784	-0.746246	-1.5215	1.40377	-0.156767	4.08047	4.0717	NA	2.88117	4.08047	3.16556	2.46874	3.7331	3.24851	3.5844	4.07171	4.08047	2.47497	2.6735	2.17912	0.299116
ENSG00000159339	PADI4	protein_coding	human	0	0.199842	0	0.171638	0	0.196875	0.15897	0.203333	0.166821	0.185554	0.17073	0	0.173057	0.198997	0.340021	NA	0.941774	NA	1.03172	NA	1.35433	0.789963	-0.980163	0.896211	0.720002	-0.482655	NA	-1.04106	1.3971	0.333251	NA	4.06594	NA	4.08047	NA	4.08047	4.08047	4.06602	4.08047	4.06582	4.06596	NA	4.08047	4.08047	3.40135	NA
ENSG00000276747	PADI6	protein_coding	human	0	0	0	0	0	0	0	0	0	0	0	0	0	0	0	NA	NA	NA	NA	NA	NA	NA	NA	NA	NA	NA	NA	NA	NA	NA	NA	NA	NA	NA	NA	NA	NA	NA	NA	NA	NA	NA	NA	NA	NA	NA
ENSG00000179051	RCC2	protein_coding	human	5754.12	6550.69	5026.68	6124.62	6233.65	5074.31	6386.72	7406.95	4659.34	6807.93	5993.61	5260.78	6909.54	5757.56	5648.27	0.395343	0.372778	0.216883	0.387988	0.329664	0.183019	0.00986679	-0.0416581	-0.0344303	0.0131759	-0.154421	-0.161737	-0.0271698	-0.144433	-0.19432	0.0513819	0.0572055	0.0506183	0.0454521	0.0543383	0.0614192	0.0391724	0.0515096	0.0579543	0.0523253	0.0518643	0.046366	0.0425594	0.0585762	0.0530126	7.69419
ENSG00000227751	RCC2-AS1	lncRNA	human	0.696497	0.172413	0.342809	0.656825	0.349085	0.142694	0.990811	0.19265	0.177629	0.56673	0.21295	0.65103	0.680765	0.159376	0.431989	1.74492	-1.09864	0.457628	1.52484	-0.0404753	-0.569223	-0.193836	1.0595	-1.02734	-2.80849	1.55757	-1.27097	-1.53646	-0.526457	-2.08133	2.43487	4.08047	3.3566	2.48988	3.31332	4.08047	1.95266	4.08047	4.08047	2.66667	4.08047	2.44844	2.43051	4.08047	3.03676	0.716638
ENSG00000074964	ARHGEF10L	protein_coding	human	438.277	541.206	459.62	475.541	535.749	475.691	365.325	516.908	389.969	418.891	443.405	358.202	452.158	453.964	402.085	-0.483416	-0.234744	-0.113732	-0.42664	-0.171178	-0.0791971	0.0737335	0.0652163	0.0343739	0.283736	0.122955	0.386208	0.286591	0.0944318	0.357978	0.101794	0.0970904	0.100873	0.095907	0.0964952	0.105464	0.105934	0.100613	0.113307	0.10562	0.105514	0.111018	0.100594	0.109351	0.109773	-4.74897
ENSG00000236648	LINC02810	lncRNA	human	0	0	0	0	0	0	0	0	0	0	0	0	0	0	0	NA	NA	NA	NA	NA	NA	NA	NA	NA	NA	NA	NA	NA	NA	NA	NA	NA	NA	NA	NA	NA	NA	NA	NA	NA	NA	NA	NA	NA	NA	NA
ENSG00000117148	ACTL8	protein_coding	human	14.1905	17.9587	11.8426	12.7455	18.2948	9.90767	14.3615	24.1036	9.45946	19.3067	16.526	13.1485	18.4143	14.8869	10.0973	0.564501	0.752247	0.27042	0.124788	0.897645	-0.315994	-0.422911	0.156394	-0.586168	0.217225	-0.492205	-0.279081	0.805119	-1.2165	-0.425873	0.518832	0.500242	0.646059	0.606177	0.473087	0.652036	0.549488	0.422957	0.72244	0.455043	0.572991	0.595467	0.508378	0.546502	0.692177	1.08802
ENSG00000284653	AL357509.1	lncRNA	human	0	0	0	0	0	0	0	0	0	0	0	0	0	0	0	NA	NA	NA	NA	NA	NA	NA	NA	NA	NA	NA	NA	NA	NA	NA	NA	NA	NA	NA	NA	NA	NA	NA	NA	NA	NA	NA	NA	NA	NA	NA
ENSG00000261781	LINC01654	lncRNA	human	0	0	0	0	0	0	0	0	0	0	0	0	0	0	0	NA	NA	NA	NA	NA	NA	NA	NA	NA	NA	NA	NA	NA	NA	NA	NA	NA	NA	NA	NA	NA	NA	NA	NA	NA	NA	NA	NA	NA	NA	NA
ENSG00000117154	IGSF21	protein_coding	human	0	0	0.201532	0	0	0	0	0	0.175704	0	0.211936	0.185832	0	0	0	NA	NA	1.41939	NA	NA	NA	NA	NA	-1.02734	NA	1.55757	1.17731	NA	NA	NA	NA	NA	4.08047	NA	NA	NA	NA	NA	4.08047	NA	4.08047	4.08047	NA	NA	NA	NA
ENSG00000280222	AL365209.1	TEC	human	0	0	0	0	0.162733	0	0	0.169619	0	0	0	0	0.159618	0.14088	0	NA	NA	NA	NA	0.921293	NA	NA	1.0595	NA	NA	NA	NA	0.88249	-0.526457	NA	NA	NA	NA	NA	4.08047	NA	NA	4.08047	NA	NA	NA	NA	4.08047	4.08047	NA	NA
ENSG00000230035	IGSF21-AS1	lncRNA	human	0	0	0	0	0	0.196875	0	0	0.166821	0	0	0	0	0.198997	0.190834	NA	NA	NA	NA	NA	1.35433	NA	NA	0.896211	NA	NA	NA	NA	1.3971	1.29502	NA	NA	NA	NA	NA	4.08047	NA	NA	4.08047	NA	NA	NA	NA	4.08047	4.08047	NA
ENSG00000225387	AL591896.1	lncRNA	human	0	0	0	0	0	0	0	0	0	0	0	0	0	0	0	NA	NA	NA	NA	NA	NA	NA	NA	NA	NA	NA	NA	NA	NA	NA	NA	NA	NA	NA	NA	NA	NA	NA	NA	NA	NA	NA	NA	NA	NA	NA
ENSG00000179023	KLHDC7A	protein_coding	human	256.599	302.862	214.374	310.43	308.581	214.551	322.284	376.984	191.72	316.775	269.184	228.239	379.069	274.481	275.653	0.431398	0.493864	0.132665	0.732967	0.62264	0.0717421	0.318343	0.131233	-0.061848	0.0975002	-0.360053	-0.282293	-0.0791704	-0.549551	-0.650999	0.128786	0.123575	0.138184	0.123915	0.119642	0.147944	0.115868	0.106666	0.147853	0.114998	0.124387	0.130299	0.10832	0.130138	0.135602	3.34972
ENSG00000235282	DYNLL1P3	processed_pseudogene	human	0	0.0922998	0	0	0	0	0	0.0939515	0	0.085237	0.0788701	0	0	0	0	NA	0.766694	NA	NA	NA	NA	NA	-0.806158	NA	0.54332	-0.30784	NA	NA	NA	NA	NA	4.0717	NA	NA	NA	NA	NA	4.07175	NA	4.07162	4.07171	NA	NA	NA	NA	NA
ENSG00000225478	AL031737.1	processed_pseudogene	human	0	0	0	0	0	0	0	0	0	0	0	0	0	0	0	NA	NA	NA	NA	NA	NA	NA	NA	NA	NA	NA	NA	NA	NA	NA	NA	NA	NA	NA	NA	NA	NA	NA	NA	NA	NA	NA	NA	NA	NA	NA
ENSG00000009709	PAX7	protein_coding	human	338.188	355.145	318.488	344.799	355.794	342.278	236.353	244.786	227.325	238.578	225.658	221.284	242.025	250.144	243.006	-0.713866	-1.076	-0.685096	-0.891501	-0.930403	-0.505273	-0.160191	0.146834	0.178897	-0.326393	0.391892	0.0453241	-0.00726422	0.426607	0.396364	0.129682	0.145933	0.133522	0.130625	0.128886	0.139715	0.133014	0.149262	0.144166	0.149222	0.154235	0.136648	0.133512	0.139766	0.14352	-5.50472
ENSG00000179002	TAS1R2	protein_coding	human	0.369204	0.194015	0.361364	0.180913	0.187804	0.161958	0.19321	0	0.177629	0.206365	0.21295	0.35549	0	0	0	0.258769	-1.09864	0.457628	-0.89183	-1.00226	-0.569223	-1.13359	NA	-1.02734	-1.32153	1.55757	0.215541	NA	NA	NA	3.26654	4.08047	3.29499	4.08047	4.08047	4.08047	4.08047	NA	4.08047	4.08047	4.08047	3.25443	NA	NA	NA	0.0792181
ENSG00000159423	ALDH4A1	protein_coding	human	574.962	637.349	513.336	650.727	621.296	520.784	543.648	565.758	378.29	524.742	465.202	422.085	583.56	458.997	487.571	-0.276623	-0.389406	-0.430924	-0.0962375	-0.368909	-0.456418	0.197337	0.0222218	-0.0260843	-0.0768824	-0.0402063	-0.137669	-0.241375	-0.0856631	-0.349562	0.0915362	0.0933318	0.0967014	0.08759	0.0972957	0.104142	0.0875761	0.0991322	0.109382	0.0929938	0.0988443	0.0978249	0.0937813	0.11026	0.10108	-3.022
ENSG00000265606	MIR4695	miRNA	human	0	0	0	0	0	0	0	0	0	0	0	0	0	0	0	NA	NA	NA	NA	NA	NA	NA	NA	NA	NA	NA	NA	NA	NA	NA	NA	NA	NA	NA	NA	NA	NA	NA	NA	NA	NA	NA	NA	NA	NA	NA
ENSG00000221662	MIR1290	miRNA	human	0.169606	0.286315	0.158492	0.82772	0.187804	0.161958	0.59618	0.0939515	0	0.085237	0.0788701	0	0.648322	0	0.56144	-0.703018	-0.193035	-0.50416	1.9112	-1.00226	-0.569223	2.62583	-0.806158	NA	0.54332	-0.30784	NA	-2.87637	NA	-2.46428	4.08047	3.60511	4.08047	2.30904	4.08047	4.08047	2.61182	4.07175	NA	4.07162	4.07171	NA	2.57027	NA	2.75604	-0.172288
ENSG00000169991	IFFO2	protein_coding	human	3583.04	3681.71	3276.05	3822.52	3433.14	3209.27	3920.56	3660.37	3017.27	3802.62	3481.31	3353.7	3797.66	3181.21	3512.06	0.341455	0.0425057	0.282385	0.339927	-0.0668509	0.168083	0.0156021	-0.108514	-0.114585	-0.262581	0.240792	-0.0422877	-0.375277	0.237186	-0.161074	0.0544602	0.0651061	0.0577228	0.0510451	0.0587612	0.0658818	0.0424573	0.060044	0.0642369	0.0584688	0.0613201	0.0510968	0.0470282	0.0626442	0.058243	6.26981
ENSG00000272084	AL137127.1	lncRNA	human	29.0995	35.065	22.3836	33.8911	36.0253	24.6832	39.9714	50.105	24.2204	41.5593	33.7699	28.1538	47.8293	36.9624	34.8609	0.921813	1.03442	0.46829	1.11036	1.1536	0.650687	0.207478	0.116713	0.182605	0.151346	-0.56607	-0.437234	0.0730512	-0.49948	-0.448982	0.383038	0.360423	0.436809	0.360763	0.351711	0.418696	0.298008	0.274781	0.393449	0.295845	0.343542	0.364862	0.276556	0.322279	0.330675	2.40658
ENSG00000127481	UBR4	protein_coding	human	8139.65	9028.4	7406.61	9062.38	8236.76	8191.05	9065.11	9222.62	7428.45	9047.91	8246.9	7418.44	9228.03	8329.47	9000.6	0.270876	0.178281	0.197018	0.379831	0.0134205	0.402236	0.126317	-0.163389	0.20383	-0.0564533	0.0202175	-0.0567685	-0.335613	0.391061	0.0321818	0.0606052	0.0570047	0.0592255	0.0647231	0.0608546	0.102636	0.101322	0.0508001	0.0981742	0.0540061	0.0518543	0.0559061	0.0617857	0.098938	0.0998939	4.46952
ENSG00000230424	EMC1-AS1	lncRNA	human	4.84264	5.7843	4.62488	5.35729	7.668	4.89256	2.7501	5.71534	2.45933	2.97114	2.87654	2.33761	5.30335	4.81458	2.8734	-1.44576	-1.11201	-1.28779	-1.26427	-0.0551226	-1.14466	0.20168	1.05632	0.149353	0.331443	-0.145752	0.15913	1.23936	-1.08652	0.123133	0.940061	0.839882	0.949084	0.890116	0.694422	0.913239	1.1796	0.836429	1.20119	1.12687	1.14777	1.25239	0.885529	0.907505	1.15533	-1.53795
ENSG00000127463	EMC1	protein_coding	human	2495.77	2581.01	2005.44	2610.9	2482.85	2108.21	2710.25	2694.14	1774.16	2692.8	2175.94	2105.63	2713.34	2192.88	2302.49	0.372844	0.0915257	-0.0418914	0.3207	0.0766568	0.0391611	-0.0345612	-0.0130415	0.0798914	-0.246018	-0.132082	-0.398057	-0.212903	-0.0354906	-0.271778	0.0641772	0.0707343	0.0721655	0.058744	0.0688217	0.0817791	0.0486658	0.0622934	0.0818166	0.0618376	0.0700358	0.0644976	0.0528997	0.0759261	0.0690568	5.8096
ENSG00000053372	MRTO4	protein_coding	human	1926.87	2049.62	1571.17	2083.62	1961.35	1560.35	2349.42	2416.08	1494.45	2339.78	1947.14	1816.09	2421.76	1855.77	1955.78	0.681875	0.495127	0.344514	0.711738	0.469509	0.268806	0.0466196	-0.0245402	-0.0759717	-0.151455	-0.14898	-0.32079	-0.211003	-0.198111	-0.431933	0.0623107	0.0786097	0.0659577	0.0589097	0.0745239	0.0780339	0.0479368	0.0757436	0.0736632	0.0692091	0.0725669	0.0559371	0.0604388	0.0791417	0.0675062	10.9432
ENSG00000286064	AL035413.2	unprocessed_pseudogene	human	0.321461	1.01835	0.744534	0.516481	1.15721	0.504682	0.497872	1.90662	0.835211	0.96032	1.35863	0.703533	1.33802	1.23149	0.662201	0.258768	2.27176	1.97747	1.01701	2.44774	1.23629	0.774977	0.126774	-0.733775	2.05051	-0.31299	1.73919	1.48006	-1.19946	0.238516	3.43004	2.16082	2.54999	2.73007	2.04516	2.78552	2.69304	1.5014	2.26784	2.13647	1.85161	2.55377	1.81941	1.8796	2.38379	0.0754416
ENSG00000211454	AKR7L	polymorphic_pseudogene	human	8.20892	7.80233	5.79385	11.8032	9.67031	4.9089	13.5823	11.7977	4.82746	10.0494	7.43605	7.67118	15.5358	8.16405	10.0075	1.01723	0.584803	0.370744	1.62587	1.14031	-0.134478	0.631861	0.56191	-0.497001	-0.40085	-0.207854	-0.626736	-0.460601	-1.25939	-1.72963	0.733273	0.747708	0.853773	0.634681	0.696993	0.986947	0.518408	0.576551	0.909266	0.595612	0.702793	0.693736	0.499644	0.759408	0.696624	1.38724
ENSG00000162482	AKR7A3	protein_coding	human	5.89925	4.47388	5.47827	8.44672	5.45004	5.37711	9.88765	5.92516	6.32077	6.34032	5.91524	6.85817	9.81899	6.58106	9.10555	1.12631	0.196512	1.11207	1.70899	0.7107	1.02945	0.596583	0.504964	-0.0837864	-0.878597	0.902775	0.00281309	-0.96955	0.323505	-0.665745	0.849648	0.934448	0.856584	0.749088	0.888971	0.888253	0.656943	0.84236	0.781028	0.790193	0.806514	0.754831	0.687254	0.81272	0.696716	1.32562
ENSG00000270728	AL035413.1	processed_pseudogene	human	0	0	0	0	0	0	0	0	0	0	0	0	0	0	0	NA	NA	NA	NA	NA	NA	NA	NA	NA	NA	NA	NA	NA	NA	NA	NA	NA	NA	NA	NA	NA	NA	NA	NA	NA	NA	NA	NA	NA	NA	NA
ENSG00000053371	AKR7A2	protein_coding	human	638.355	708.354	581.227	694.307	673.706	618.015	625.827	669.295	504.06	634.975	577.363	521.156	657.099	583.625	601.636	-0.0509604	-0.155988	-0.131932	0.00375918	-0.209033	-0.0154116	0.0715563	-0.052132	0.116	-0.0694575	0.0252795	-0.0643354	-0.181628	0.195756	-0.00841724	0.0881922	0.0863025	0.0906645	0.0828245	0.0909957	0.0976633	0.0829516	0.087761	0.100644	0.0863845	0.0895372	0.0921611	0.0859928	0.100313	0.0939271	-0.577833
ENSG00000200403	RNU6-1099P	snRNA	human	6.20666	6.31217	4.45441	6.64365	5.79896	5.28772	6.37901	5.60702	3.56845	6.06677	4.26112	4.30929	5.98079	4.68147	5.42868	0.151784	-0.248929	-0.678547	0.168472	-0.386523	-0.187581	0.0348736	-0.138052	0.491044	-0.367767	-0.43607	-0.810607	-0.52399	0.201464	-0.343156	0.786977	0.786884	0.961127	0.771711	0.814112	0.852572	0.765831	0.82131	1.02514	0.777613	0.964823	0.958355	0.803289	0.884825	0.840517	0.192869
ENSG00000040487	SLC66A1	protein_coding	human	343.351	396.703	288.881	363.558	388.749	310.568	357.606	439.465	256.747	388.147	329.084	284.685	402.775	344.427	322.161	0.205679	0.221308	-0.0964909	0.183439	0.252232	0.0505834	-0.00546814	0.0326942	0.145798	0.0512017	-0.316473	-0.285642	0.0999201	-0.200497	-0.122875	0.115992	0.124512	0.122929	0.114112	0.110414	0.132381	0.110809	0.114175	0.134587	0.11914	0.127252	0.119889	0.105503	0.122659	0.127477	1.77322
ENSG00000077549	CAPZB	protein_coding	human	3771.09	4030.32	3149.72	3967.71	3926.26	3277.65	3840.45	4058.58	2634.61	3894.26	3248.54	3050.96	3989.92	3286.88	3327.69	0.156498	-0.048039	-0.17125	0.116452	-0.0281099	-0.116713	-0.0227953	0.0215706	0.054042	-0.168996	-0.121716	-0.311013	-0.113407	-0.0864356	-0.222517	0.0625416	0.0672361	0.0652979	0.056168	0.0658577	0.0715976	0.0453303	0.0569819	0.0678417	0.058106	0.0611388	0.0574447	0.0483457	0.0644187	0.0580075	2.5023
ENSG00000240490	RN7SL277P	misc_RNA	human	0	0	0	0	0	0	0	0	0	0	0	0	0	0	0	NA	NA	NA	NA	NA	NA	NA	NA	NA	NA	NA	NA	NA	NA	NA	NA	NA	NA	NA	NA	NA	NA	NA	NA	NA	NA	NA	NA	NA	NA	NA
ENSG00000173436	MICOS10	protein_coding	human	98.5752	113.047	84.3976	111.365	103.914	85.3301	106.771	114.44	69.7564	108.159	92.9488	81.0223	112.467	85.9616	92.5837	0.138865	0.140283	-0.119628	0.285969	-0.00572551	-0.147607	0.163472	-0.143324	-0.0281577	0.0367379	-0.258143	-0.241727	-0.261139	-0.138631	-0.422518	0.203915	0.194417	0.21693	0.195761	0.219354	0.22645	0.192949	0.208387	0.235301	0.190367	0.205389	0.215099	0.209994	0.239887	0.216541	0.680991
ENSG00000201609	RNU4-28P	snRNA	human	0	0	0	0	0	0	0	0	0	0	0	0	0	0	0	NA	NA	NA	NA	NA	NA	NA	NA	NA	NA	NA	NA	NA	NA	NA	NA	NA	NA	NA	NA	NA	NA	NA	NA	NA	NA	NA	NA	NA	NA	NA
ENSG00000235185	AL031727.2	lncRNA	human	1.11229	0.579184	0.576622	0.637607	0.835657	0.617217	0.844685	0.479252	0.338025	0.799741	0.267531	0.751062	0.546712	0.533781	0.368205	0.687307	-1.59002	-0.946816	-1.33588	-0.458769	-1.0133	-2.01862	1.16981	-0.0655585	-2.24606	0.652042	-1.6252	0.935497	-0.580795	0.333252	1.898	2.58124	2.57888	2.51164	2.25074	2.56682	2.24322	2.94079	3.33172	2.25688	3.63118	2.32992	2.81344	2.86069	3.30703	0.362122
ENSG00000158747	NBL1	protein_coding	human	639.281	745.271	600.537	652.9	693.859	574.384	671.428	826.961	553.024	758.918	712.3	612.091	727.246	639.123	602.13	0.333413	0.371206	0.345228	0.219574	0.271751	0.170793	-0.0961053	-0.0980084	-0.174852	0.0739641	-0.024709	0.0288338	0.0832026	-0.0992683	-0.0373894	0.0931154	0.0881577	0.0919131	0.0871117	0.0889479	0.113451	0.0855634	0.0819754	0.113373	0.0868983	0.0867481	0.0921405	0.0824771	0.108942	0.109585	3.58064
ENSG00000270136	MICOS10-NBL1	protein_coding	human	0.823265	0.944949	0.805604	0.508209	0.87272	0.455424	0.337749	0.768937	0.313639	0.731473	0.718781	0.625913	0.340086	0.300256	0	-0.410334	-0.543621	-0.242432	-2.42605	-0.623162	-2.10547	-1.97747	-0.0883083	-1.82764	-0.0718906	0.269034	0.177357	1.83874	-1.48386	NA	2.27817	2.20428	2.29699	2.85341	2.12011	3.00725	3.51906	2.37198	3.66706	2.50651	2.5625	2.65044	3.27965	3.4673	NA	-0.180115
ENSG00000226396	AL031727.1	processed_pseudogene	human	9.40485	10.5594	9.0852	13.0325	13.7772	9.51436	11.7225	13.9234	8.1617	9.36988	9.06889	8.08095	16.1935	12.2786	11.6168	-0.064743	-0.0991253	0.00145567	0.595807	0.650564	0.0632088	0.676981	0.740336	0.062801	-0.00518368	0.109408	0.0863581	0.0868008	-0.585935	-0.522078	0.645327	0.600092	0.65148	0.575811	0.516594	0.654624	0.622782	0.526597	0.710983	0.647992	0.662306	0.709209	0.512315	0.580038	0.642167	-0.100326
ENSG00000158748	HTR6	protein_coding	human	10.6174	9.55597	10.1709	11.6914	9.9341	8.48526	10.8542	7.90973	7.55851	8.84028	8.5445	9.40273	10.1662	7.09491	8.67904	0.0507534	-0.738553	0.110371	0.133436	-0.499085	-0.532669	0.0976202	0.240511	-0.643814	-0.75167	0.850036	0.0759919	-0.600394	-0.0305445	-0.654512	0.59946	0.650966	0.61939	0.571017	0.616147	0.6879	0.571131	0.684567	0.705089	0.647421	0.674649	0.624362	0.595598	0.716838	0.664983	0.0846652
ENSG00000162542	TMCO4	protein_coding	human	191.742	196.977	163.906	192.38	184.788	169.724	193.119	190.465	145.204	197.611	168.798	164.207	186.013	163.708	170.164	0.254007	-0.0503463	0.00611674	0.0827661	-0.153615	0.0377999	-0.154671	-0.102261	0.0311485	-0.267856	0.057526	-0.231559	-0.205536	0.192948	-0.0352837	0.14644	0.152851	0.160017	0.147173	0.153945	0.166053	0.138165	0.152126	0.169643	0.143034	0.157817	0.151847	0.147082	0.165057	0.158869	1.73455
ENSG00000178828	RNF186	protein_coding	human	0	0	0	0	0	0	0	0	0	0	0	0	0	0	0	NA	NA	NA	NA	NA	NA	NA	NA	NA	NA	NA	NA	NA	NA	NA	NA	NA	NA	NA	NA	NA	NA	NA	NA	NA	NA	NA	NA	NA	NA	NA
ENSG00000235434	AL391883.1	lncRNA	human	0	0	0	0	0	0	0	0	0	0	0	0	0	0	0	NA	NA	NA	NA	NA	NA	NA	NA	NA	NA	NA	NA	NA	NA	NA	NA	NA	NA	NA	NA	NA	NA	NA	NA	NA	NA	NA	NA	NA	NA	NA
ENSG00000169914	OTUD3	protein_coding	human	294.77	370.794	326.671	354.709	356.17	323.218	310.641	389.347	307.699	323.174	355.284	285.61	371.356	337.458	335.01	-0.151545	0.108134	0.324051	0.192723	0.0917696	0.23672	0.361968	-0.0135013	-0.0877756	0.293824	0.219259	0.492555	-0.0707023	0.147618	0.0544829	0.131147	0.125809	0.127393	0.121223	0.126005	0.134554	0.111389	0.112462	0.120794	0.116179	0.113526	0.118318	0.108282	0.120488	0.115681	-1.15554
ENSG00000188784	PLA2G2E	protein_coding	human	0.169606	0.194015	0.158492	0.180913	0.187804	0.161958	0	0	0	0	0	0	0	0	0	-0.703018	-1.09864	-0.50416	-0.89183	-1.00226	-0.569223	NA	NA	NA	NA	NA	NA	NA	NA	NA	4.08047	4.08047	4.08047	4.08047	4.08047	4.08047	NA	NA	NA	NA	NA	NA	NA	NA	NA	-0.172288
ENSG00000242688	RN7SL304P	misc_RNA	human	0	0	0	0	0	0	0	0	0	0	0	0	0	0	0	NA	NA	NA	NA	NA	NA	NA	NA	NA	NA	NA	NA	NA	NA	NA	NA	NA	NA	NA	NA	NA	NA	NA	NA	NA	NA	NA	NA	NA	NA	NA
ENSG00000188257	PLA2G2A	protein_coding	human	0	0	0.360371	0	0	0.165113	0	0	0.454918	0	0.377321	0.330373	0	0.167366	0.161583	NA	NA	2.22434	NA	NA	1.35433	NA	NA	-0.875564	NA	2.36094	1.97887	NA	1.3971	1.29502	NA	NA	3.52307	NA	NA	4.08047	NA	NA	2.98991	NA	3.43177	3.57042	NA	4.08047	4.08047	NA
ENSG00000127472	PLA2G5	protein_coding	human	0	0	0	0	0	0	0	0	0	0	0	0	0	0	0	NA	NA	NA	NA	NA	NA	NA	NA	NA	NA	NA	NA	NA	NA	NA	NA	NA	NA	NA	NA	NA	NA	NA	NA	NA	NA	NA	NA	NA	NA	NA
ENSG00000117215	PLA2G2D	protein_coding	human	0	0	0	0	0	0	0	0	0	0	0	0	0	0	0	NA	NA	NA	NA	NA	NA	NA	NA	NA	NA	NA	NA	NA	NA	NA	NA	NA	NA	NA	NA	NA	NA	NA	NA	NA	NA	NA	NA	NA	NA	NA
ENSG00000158786	PLA2G2F	protein_coding	human	0	0	0	0	0.162733	0	0	0.169619	0	0	0	0	0.159618	0.14088	0	NA	NA	NA	NA	0.921293	NA	NA	1.0595	NA	NA	NA	NA	0.88249	-0.526457	NA	NA	NA	NA	NA	4.08047	NA	NA	4.08047	NA	NA	NA	NA	4.08047	4.08047	NA	NA
ENSG00000227066	Z98257.1	lncRNA	human	0.349299	0.572096	0.543001	0.467427	0.166899	0.307807	0.477031	0.406667	0.492686	0.577473	0.765332	0.540902	0.308364	0.167366	0.428811	0.258769	1.02385	1.39105	0.85957	-1.00226	0.392563	0.619467	-2.04989	-0.998651	0.798146	0.386831	1.15209	-1.81579	1.3971	-0.454025	3.33046	2.83119	2.84979	3.01259	4.08047	3.55546	2.91151	3.3502	2.90896	2.73386	2.50818	2.80534	3.69668	4.08047	3.11934	0.0776976
ENSG00000187980	PLA2G2C	protein_coding	human	0	0	0.202873	0	0	0	0	0	0.177629	0	0.21295	0.186253	0	0	0	NA	NA	1.41939	NA	NA	NA	NA	NA	-1.02734	NA	1.55757	1.17731	NA	NA	NA	NA	NA	4.08047	NA	NA	NA	NA	NA	4.08047	NA	4.08047	4.08047	NA	NA	NA	NA
ENSG00000225986	UBXN10-AS1	lncRNA	human	0	0	0	0	0	0	0	0	0	0	0	0	0	0	0	NA	NA	NA	NA	NA	NA	NA	NA	NA	NA	NA	NA	NA	NA	NA	NA	NA	NA	NA	NA	NA	NA	NA	NA	NA	NA	NA	NA	NA	NA	NA
ENSG00000162543	UBXN10	protein_coding	human	2.20184	2.32071	2.20057	2.43528	2.50433	2.13531	1.43539	1.46012	1.27844	1.25571	1.32515	1.31114	1.63995	1.41872	1.39037	-1.09623	-1.4269	-0.85325	-0.952569	-1.03736	-1.00053	0.161695	0.419351	-0.163008	-0.327556	0.607811	0.266876	-0.0479491	0.0239621	-0.0477633	1.36794	1.35691	1.3319	1.30718	1.24059	1.41597	1.64616	1.5863	1.69116	1.73311	1.66588	1.65499	1.50553	1.61961	1.72834	-0.801374
ENSG00000228105	LINC01757	lncRNA	human	0	0	0	0	0	0	0	0	0	0	0	0	0	0	0	NA	NA	NA	NA	NA	NA	NA	NA	NA	NA	NA	NA	NA	NA	NA	NA	NA	NA	NA	NA	NA	NA	NA	NA	NA	NA	NA	NA	NA	NA	NA
ENSG00000284710	Z98257.2	lncRNA	human	0	0	0	0	0	0	0	0	0	0	0	0	0	0	0	NA	NA	NA	NA	NA	NA	NA	NA	NA	NA	NA	NA	NA	NA	NA	NA	NA	NA	NA	NA	NA	NA	NA	NA	NA	NA	NA	NA	NA	NA	NA
ENSG00000158816	VWA5B1	protein_coding	human	0	0	0.202873	0.153878	0	0	0.141911	0	0.177629	0	0.21295	0.186253	0.154182	0	0.133614	NA	NA	1.41939	1.03172	NA	NA	0.789963	NA	-1.02734	NA	1.55757	1.17731	-1.04106	NA	-0.628535	NA	NA	4.08047	4.08047	NA	NA	4.08047	NA	4.08047	NA	4.08047	4.08047	4.08047	NA	4.08047	NA
ENSG00000226664	AL020998.1	lncRNA	human	0	0	0	0	0	0	0	0	0	0	0	0	0	0	0	NA	NA	NA	NA	NA	NA	NA	NA	NA	NA	NA	NA	NA	NA	NA	NA	NA	NA	NA	NA	NA	NA	NA	NA	NA	NA	NA	NA	NA	NA	NA
ENSG00000236963	LINC01141	lncRNA	human	0.273712	0.499071	0.616871	1.16449	0.600218	0.639637	0.806329	0.499685	0.636123	0.170474	0.535061	0.330373	1.16986	0.640393	1.12654	-1.47427	-0.421635	0.4804	1.50223	-0.0409381	0.472706	3.04248	0.383149	-0.000170408	1.07291	0.899925	1.97887	-1.51363	0.51845	-1.02835	3.91874	2.93581	2.71092	2.04945	2.71974	2.56155	2.37079	2.89199	2.49799	4.05584	2.8197	3.57042	2.0206	2.51672	1.98093	-0.376211
ENSG00000226487	AL139254.1	lncRNA	human	0	0	0	0	0	0.196875	0	0	0.166821	0	0	0	0	0.198997	0.190834	NA	NA	NA	NA	NA	1.35433	NA	NA	0.896211	NA	NA	NA	NA	1.3971	1.29502	NA	NA	NA	NA	NA	4.08047	NA	NA	4.08047	NA	NA	NA	NA	4.08047	4.08047	NA
ENSG00000284641	AL139254.2	lncRNA	human	0.696497	0.372255	0.500307	0.15967	0.314815	0.339568	0.530959	0.359224	0.48046	0.752284	0.548051	0.79515	0.145929	0.327996	0.190834	1.74492	-0.0357635	1.27156	-0.89183	-0.0404759	0.392564	-2.61715	-0.00248151	-0.876651	-1.77716	1.32223	-0.444909	0.88249	0.43533	1.29502	2.43487	3.28696	2.93026	4.08047	3.43689	3.43156	2.73108	3.27882	2.93562	2.32217	2.81623	2.2697	4.08047	3.40351	4.08047	0.716638
ENSG00000284743	AL139254.3	lncRNA	human	6.6677	6.30965	6.33759	6.02304	6.56736	7.72819	3.54267	3.17569	5.0349	3.6278	3.51249	4.05784	3.10638	5.13991	4.69752	-0.886149	-1.71334	-0.811447	-1.75181	-1.43829	-0.204702	-0.843462	0.318012	0.610602	-0.832319	0.942807	0.0887857	0.329212	1.24025	1.55545	0.796741	0.879241	0.808297	0.882245	0.800936	0.745967	1.06228	1.13365	0.897787	1.0781	1.1001	0.973125	1.1061	0.901849	0.989199	-1.11222
ENSG00000162545	CAMK2N1	protein_coding	human	3245.63	3264.94	3000.72	3338.75	3270.23	2999	2604.84	2420.94	2147.2	2488.31	2294.67	2342.21	2552.89	2291.55	2373.07	-0.418359	-0.910745	-0.457608	-0.546409	-0.773339	-0.53578	-0.110853	0.138566	-0.0785545	-0.456297	0.453983	-0.0227488	-0.195336	0.239538	0.0213315	0.0655491	0.0749131	0.0595601	0.0540779	0.0636904	0.0732269	0.055915	0.0736918	0.0713162	0.0767207	0.0717707	0.062739	0.0542164	0.0732425	0.0664005	-6.38237
ENSG00000090432	MUL1	protein_coding	human	854.785	929.444	787.446	909.491	911.312	777.992	886.95	966.924	697.037	904.927	834.025	765.131	943.323	806.047	803.914	0.179836	0.0257254	0.138754	0.17095	0.0652701	0.0431754	0.00809966	0.0410841	-0.0960408	-0.118653	0.11431	-0.0244753	-0.0744579	-0.0198395	-0.117258	0.0799152	0.0810252	0.0839469	0.0762964	0.0816662	0.0906161	0.0709194	0.0744615	0.0902543	0.0750277	0.0792349	0.0788587	0.0718057	0.085962	0.0833122	2.25033
ENSG00000215520	RPS4XP4	processed_pseudogene	human	0	0	0	0	0.364372	0	0	0.385301	0	0	0	0	0.360936	0.318751	0	NA	NA	NA	NA	1.94601	NA	NA	2.09016	NA	NA	NA	NA	1.91274	-1.55965	NA	NA	NA	NA	NA	3.48267	NA	NA	3.41137	NA	NA	NA	NA	3.47795	3.68755	NA	NA
ENSG00000183114	FAM43B	protein_coding	human	89.4659	123.885	109.711	95.1099	114.732	102.945	64.0146	114.355	91.2138	88.5308	109.889	80.0964	85.9447	94.6419	77.8148	-0.784092	-0.128448	0.102013	-0.800232	-0.274352	-0.145522	0.000620864	-0.145231	-0.247925	0.690308	0.231194	0.902658	0.556774	0.131108	0.665184	0.220619	0.189711	0.198042	0.212914	0.193203	0.208048	0.239267	0.185826	0.207356	0.210329	0.19009	0.220841	0.210911	0.204334	0.225856	-3.55406
ENSG00000158825	CDA	protein_coding	human	188.567	217.366	200.002	191.088	210.838	208.695	150.5	192.887	178.08	172.142	185.742	161.263	167.976	188.013	170.727	-0.390052	-0.36829	-0.00235618	-0.571377	-0.366094	0.0596228	-0.164581	0.00359766	0.060823	0.0571343	0.368067	0.404307	0.23598	0.428113	0.641053	0.14461	0.141403	0.146172	0.150833	0.142252	0.146046	0.161259	0.149883	0.15758	0.150963	0.15356	0.156997	0.160239	0.153897	0.163545	-2.69727
ENSG00000158828	PINK1	protein_coding	human	769.675	988.029	861.047	817.782	912.347	866.672	557.547	834.942	702.233	697.708	799.407	619.351	673.266	737.012	657.272	-0.754741	-0.351613	-0.143985	-0.771208	-0.515077	-0.191684	0.000393926	-0.163036	-0.0484666	0.439061	0.208923	0.627424	0.28729	0.325861	0.590325	0.0872946	0.0839475	0.085926	0.0867845	0.0826773	0.091647	0.0911158	0.0809516	0.0949417	0.0869881	0.0861876	0.0902137	0.0858679	0.089792	0.0964456	-8.64591
ENSG00000284005	MIR6084	miRNA	human	0	0	0	0	0	0	0	0	0	0	0	0	0	0	0	NA	NA	NA	NA	NA	NA	NA	NA	NA	NA	NA	NA	NA	NA	NA	NA	NA	NA	NA	NA	NA	NA	NA	NA	NA	NA	NA	NA	NA	NA	NA
ENSG00000117242	PINK1-AS	lncRNA	human	297.305	304.159	211.229	314.638	300.276	227.741	343.8	343.326	181.892	336.628	245.017	240.811	350.807	258.847	271.297	0.551951	0.256479	-0.195044	0.530117	0.310621	-0.0334434	-0.00458238	0.0549943	0.160504	-0.259841	-0.451343	-0.730456	-0.188673	-0.342355	-0.553797	0.125062	0.121995	0.152571	0.117077	0.126459	0.152303	0.109553	0.11481	0.171056	0.114256	0.141216	0.144536	0.111736	0.144777	0.13686	4.41343
ENSG00000244038	DDOST	protein_coding	human	2797.38	3050.4	2453.7	2912.63	2915.69	2556.14	2697.42	2928.98	2060.21	2812.74	2461.01	2263.23	2795.57	2445.55	2446.33	0.026286	-0.126827	-0.164189	-0.0458649	-0.163483	-0.106488	-0.0550861	-0.0345749	0.0569228	-0.117939	-0.0358155	-0.17395	-0.0860597	0.0588094	-0.0502314	0.0616923	0.0677351	0.0660857	0.061602	0.0674534	0.0746145	0.0483877	0.0576277	0.0682463	0.0543037	0.059419	0.0540749	0.0536936	0.0670238	0.0638539	0.426082
ENSG00000117245	KIF17	protein_coding	human	29.0725	30.6438	23.274	32.3688	30.8348	29.6317	29.6958	29.5767	21.8425	27.9506	22.0569	21.2294	31.3725	28.7024	29.9627	-0.00217159	-0.27571	-0.487834	0.116715	-0.137818	0.178931	0.135199	0.13851	0.665158	-0.237213	-0.213729	-0.46946	-0.223296	0.318801	0.0714362	0.368602	0.360262	0.406161	0.343893	0.351745	0.37696	0.356389	0.360687	0.425216	0.371272	0.415272	0.422183	0.344481	0.375955	0.369198	-0.00589142
ENSG00000235432	AL663074.2	unprocessed_pseudogene	human	0.169606	0.408544	0.361364	0.709362	0.532723	0.964088	0.488388	0.579883	0.859296	0.198177	0.396122	0.186253	0.871976	1.11228	1.23908	-0.703018	-0.0386488	0.457628	1.59043	0.907767	2.34697	2.31595	0.965275	1.88469	0.720002	0.498337	1.17731	-0.659859	1.44939	0.764066	4.08047	3.18532	3.29499	2.43483	2.67807	2.24095	2.81182	2.60636	2.25786	4.06582	3.16612	4.08047	2.11297	1.97458	1.86076	-0.172288
ENSG00000189410	SH2D5	protein_coding	human	260.091	317.396	207.406	346.699	302.261	209.369	419.568	457.011	231.586	398.493	334.78	277.461	476.106	323.428	359.493	1.21004	1.32585	0.867007	1.64913	1.2998	0.836562	0.456052	-0.0230284	-0.0307298	0.149125	-0.456592	-0.326678	-0.319524	-0.460726	-0.802631	0.134169	0.155334	0.149195	0.119149	0.136797	0.157812	0.0992302	0.136796	0.147816	0.134918	0.147349	0.125513	0.103958	0.13722	0.121956	9.01883
ENSG00000233069	AL663074.1	lncRNA	human	0.570958	0.491983	0.381718	0	0	0.211506	0.554873	0.500618	0.513729	1.04718	0.820927	0.835528	0	0.21503	0.207607	2.75703	2.33879	2.29296	NA	NA	1.35433	-2.66744	-2.37797	-0.939677	-0.392447	-0.0211343	-0.430847	NA	1.3971	1.29502	2.725	2.90351	3.1826	NA	NA	4.08047	2.69218	2.84319	2.69592	1.92837	2.16408	2.12918	NA	4.08047	4.08047	1.01175
ENSG00000127483	HP1BP3	protein_coding	human	5799.37	6014.86	4831.5	6038.66	5974.99	4976.68	5703.59	5820.09	3865.93	5665.84	4682.52	4554.62	5851.9	4793.37	4862.89	0.083454	-0.216243	-0.261317	0.0128205	-0.136812	-0.237749	-0.0533299	0.0808233	0.0233104	-0.263894	-0.0437528	-0.328071	-0.118455	-0.0984641	-0.239664	0.0555204	0.0541947	0.052723	0.0497792	0.0549656	0.0645713	0.0438145	0.0485614	0.058632	0.0510345	0.046945	0.048788	0.0446648	0.0596199	0.056007	1.50312
ENSG00000075151	EIF4G3	protein_coding	human	2974.4	3064.98	2813.19	3116.46	2958.31	2892.55	2826.62	2713.11	2468.15	2762.15	2619.09	2542.17	2786.55	2594.91	2732.09	-0.0328596	-0.367341	-0.000962074	-0.0884234	-0.377693	0.0156842	-0.0385744	-0.009286	0.0160035	-0.298365	0.367526	0.0485769	-0.258062	0.395476	0.114491	0.0548893	0.0660859	0.0567655	0.0539615	0.0590692	0.0673679	0.0463424	0.0605291	0.0631983	0.0593736	0.0607494	0.0498785	0.0501924	0.0628298	0.0608991	-0.598652
ENSG00000251914	RNU7-200P	snRNA	human	0	0	0	0	0	0	0	0	0	0	0	0	0	0	0	NA	NA	NA	NA	NA	NA	NA	NA	NA	NA	NA	NA	NA	NA	NA	NA	NA	NA	NA	NA	NA	NA	NA	NA	NA	NA	NA	NA	NA	NA	NA
ENSG00000221808	MIR1256	miRNA	human	0.321461	0.172413	0.139937	0.530015	0.492364	0.86667	0.509349	0.339238	0.616198	0.178107	0	0.146035	0.690787	1.01449	1.02603	0.258768	-1.09864	-0.50416	1.05996	0.849841	2.23354	0.814348	1.93886	2.7304	-1.32153	NA	-0.746246	-0.175893	1.39016	1.2041	3.43004	4.08047	4.08047	2.8854	2.92635	2.28457	2.84582	3.58241	2.59022	4.08047	NA	4.08047	2.57949	2.09793	2.1074	0.0754416
ENSG00000233072	RPS15AP6	processed_pseudogene	human	0.866731	1.96409	1.19315	1.63973	1.45167	1.32603	0.658836	1.49466	0.756359	0.897609	1.22827	0.351019	1.19652	0.924739	1.10432	-3.12733	-0.0321264	-1.09138	-0.424387	-0.99389	-0.679939	2.74475	-0.966306	0.397266	3.12923	-1.05565	2.05142	-0.55648	0.299836	-0.267045	2.20435	1.42634	1.82856	1.55435	1.72688	1.81132	2.51107	1.77006	2.33279	2.23345	1.85589	3.2191	1.93405	2.30114	2.02117	-1.41871
ENSG00000236073	AL627311.1	processed_pseudogene	human	1.53539	1.55222	1.31174	1.08578	1.27829	1.13849	0.506204	0.547127	0.454918	0.8945	0.705791	0.771948	0.145929	0.296364	0.161583	-0.953948	-1.52215	-1.3566	-3.54606	-2.69735	-2.2636	-2.56311	-1.1304	-0.875564	-0.547862	0.183969	-0.394201	0.88249	0.435329	1.29502	1.59676	1.62004	1.82428	2.04702	1.894	1.98187	2.77442	2.61398	2.98991	2.01797	2.38057	2.28919	4.08047	3.52995	4.08047	-0.597425
ENSG00000235112	HSPE1P27	processed_pseudogene	human	0	0	0	0	0	0	0	0	0	0	0	0	0	0	0	NA	NA	NA	NA	NA	NA	NA	NA	NA	NA	NA	NA	NA	NA	NA	NA	NA	NA	NA	NA	NA	NA	NA	NA	NA	NA	NA	NA	NA	NA	NA
ENSG00000287192	AL031005.2	lncRNA	human	2.58641	2.70229	1.8227	3.51419	2.30812	2.41383	3.16676	2.08385	1.48876	2.40528	1.62439	1.61113	2.93519	1.8923	2.94345	-0.0785444	-0.376273	-1.09539	0.541711	-0.841778	-0.161732	0.638105	-0.465621	0.93696	-0.26157	-0.721036	-1.00226	-1.35749	0.683023	-0.695826	1.17492	1.17261	1.45366	1.05791	1.26446	1.23538	1.08615	1.3183	1.54258	1.19704	1.50486	1.49173	1.17861	1.36948	1.15697	-0.0668507
ENSG00000117298	ECE1	protein_coding	human	5636.63	6690.02	5311.98	5926.73	6415.69	5526.28	5414.49	6934.82	4731.01	6091.46	5735.33	4833.87	6142.68	5706.3	5276.03	-0.0124113	0.0820319	0.00906997	-0.0567581	0.0557647	0.0588931	-0.0269194	-0.0249718	0.0487938	0.130695	-0.0719177	0.0383603	0.143927	0.00496558	0.125753	0.0576082	0.0586361	0.0567056	0.0526117	0.0589473	0.0741169	0.0407577	0.0442503	0.0657774	0.0473628	0.0458469	0.046806	0.0408173	0.0653672	0.0619551	-0.215444
ENSG00000236936	AL031005.1	lncRNA	human	1.16797	1.20808	0.576622	0.914069	1.14631	0.405711	1.14948	1.44332	0.15682	1.43817	0.804605	0.797466	1.12903	0.58863	0.400842	0.757141	0.443155	-0.946816	0.0419367	0.45986	-1.96678	-0.696465	0.0356026	-1.02734	-0.295405	-1.42777	-1.70685	0.455066	-2.45839	-1.98708	1.78191	1.79022	2.57888	2.17232	1.78374	3.13211	1.84949	1.58731	4.08047	1.56755	2.19164	2.16918	1.87802	2.49799	3.40115	0.424903
ENSG00000231105	ECE1-AS1	lncRNA	human	4.79773	4.48646	6.2859	5.84913	7.22211	4.11495	4.54639	5.57371	4.38874	3.20143	4.88868	5.02741	6.88647	4.9982	3.84312	-0.516855	-1.28212	0.463803	-0.116331	0.370443	-0.893013	0.419586	1.65263	-1.35681	-0.743861	1.7431	0.997034	0.521857	-1.26519	-0.781678	0.887824	0.971943	0.776359	0.851358	0.743716	1.02295	0.957552	0.923665	0.995616	1.10435	0.950948	0.8795	0.818807	0.973849	1.11831	-0.58216
ENSG00000236216	PPP1R11P1	processed_pseudogene	human	1.52309	1.98164	1.29621	1.69874	2.15956	1.10772	1.18517	2.07089	0.522078	1.41583	1.18714	0.857016	1.77665	1.16274	0.78342	-0.749182	-0.27204	-1.14526	-0.555887	0.101235	-2.14114	0.210159	0.380885	-1.00975	0.510834	-0.864814	-0.380494	0.686353	-2.22592	-1.5676	1.69918	1.42824	1.94156	1.54517	1.44288	2.12224	1.74349	1.3844	2.85363	1.61153	1.86299	2.21509	1.49911	2.05526	2.22587	-0.440906
ENSG00000228823	AL592309.1	unprocessed_pseudogene	human	0	0	0	0	0	0	0	0	0	0	0	0	0	0	0	NA	NA	NA	NA	NA	NA	NA	NA	NA	NA	NA	NA	NA	NA	NA	NA	NA	NA	NA	NA	NA	NA	NA	NA	NA	NA	NA	NA	NA	NA	NA
ENSG00000236009	AL592309.2	lncRNA	human	0	0	0	0	0	0	0	0	0	0	0	0	0	0	0	NA	NA	NA	NA	NA	NA	NA	NA	NA	NA	NA	NA	NA	NA	NA	NA	NA	NA	NA	NA	NA	NA	NA	NA	NA	NA	NA	NA	NA	NA	NA
ENSG00000227001	NBPF2P	unprocessed_pseudogene	human	0.171761	0	0	0.171638	0.162733	0.196875	0.327424	0.169619	0.166821	0.178107	0	0.146035	0.332675	0.339878	0.340021	1.22054	NA	NA	1.03172	0.921293	1.35433	-0.171807	1.0595	0.896211	-1.32153	NA	-0.746246	-0.0792797	0.435331	0.333251	4.08047	NA	NA	4.08047	4.08047	4.08047	3.33094	4.08047	4.08047	4.08047	NA	4.08047	3.3545	3.36081	3.40135	0.299116
ENSG00000187952	HS6ST1P1	processed_pseudogene	human	0.690665	0.580957	0.499961	0.340584	0.684806	0.698401	0.361664	0.566155	0.509345	0.58265	0.395109	0.501104	0.326397	0.686369	0.381667	0.232499	-1.00395	-0.491148	-1.84795	-0.0822114	0.379131	-2.05639	0.924209	0.861036	-1.19945	0.498253	-0.702778	1.78952	0.458685	2.22444	2.33208	2.63844	2.74574	3.33296	2.32883	2.4877	3.16673	2.62623	2.87759	2.56028	3.1689	2.70123	3.32931	2.45956	3.48519	0.0996963
ENSG00000186543	CROCCP5	unprocessed_pseudogene	human	0	0	0	0	0	0	0	0	0	0	0	0	0	0	0	NA	NA	NA	NA	NA	NA	NA	NA	NA	NA	NA	NA	NA	NA	NA	NA	NA	NA	NA	NA	NA	NA	NA	NA	NA	NA	NA	NA	NA	NA	NA
ENSG00000142794	NBPF3	protein_coding	human	300.784	365.817	307.089	304.535	353.48	310.467	229.852	333.264	246.173	281.516	290.069	237.533	273.613	282.304	240.751	-0.488457	-0.286127	-0.19989	-0.67879	-0.301026	-0.237372	-0.173535	-0.014891	-0.0378569	0.237898	0.0870563	0.305053	0.408758	0.0660054	0.452057	0.126309	0.119757	0.122145	0.123227	0.116691	0.131778	0.129848	0.115499	0.132911	0.124277	0.12155	0.128605	0.120604	0.12794	0.136036	-3.86716
ENSG00000176378	PFN1P10	processed_pseudogene	human	0	0	0	0	0	0	0	0	0	0	0	0	0	0	0	NA	NA	NA	NA	NA	NA	NA	NA	NA	NA	NA	NA	NA	NA	NA	NA	NA	NA	NA	NA	NA	NA	NA	NA	NA	NA	NA	NA	NA	NA	NA
ENSG00000162551	ALPL	protein_coding	human	5.62867	6.7574	7.33205	4.74918	6.87317	4.78503	3.73618	6.78636	5.3705	5.52414	7.32661	6.17497	4.76317	4.77213	2.97317	-0.321176	-0.200536	0.59037	-1.27841	-0.036316	-0.709552	-0.93678	0.165058	-1.29729	0.158745	0.792497	0.927918	1.27384	-0.67051	0.562893	0.808926	0.750561	0.718682	0.930326	0.720656	0.916623	1.00816	0.740087	0.877014	0.815853	0.731269	0.786836	0.918268	0.902314	1.15539	-0.39704
ENSG00000233431	LINC02596	lncRNA	human	0	0	0	0	0	0.165113	0	0	0.141278	0	0	0	0	0.167366	0.161583	NA	NA	NA	NA	NA	1.35433	NA	NA	0.896211	NA	NA	NA	NA	1.3971	1.29502	NA	NA	NA	NA	NA	4.08047	NA	NA	4.08047	NA	NA	NA	NA	4.08047	4.08047	NA
ENSG00000076864	RAP1GAP	protein_coding	human	2265.1	2552.14	2316.59	2429.54	2684.29	2543.22	1588.61	2007.23	1808.66	1645.3	1746.61	1558.74	1922.29	2087.89	1876.53	-0.858193	-0.937664	-0.522684	-0.839473	-0.61164	-0.28377	0.035662	0.327513	0.238221	-0.0435414	0.416064	0.352317	0.259272	0.329723	0.565816	0.0655488	0.0710462	0.0771635	0.0602314	0.0784075	0.0756403	0.0588618	0.0796667	0.0852294	0.0691165	0.0802516	0.0765781	0.0717318	0.0853033	0.0678591	-13.0924
ENSG00000090686	USP48	protein_coding	human	1355.91	1496.25	1260.86	1431.7	1461.47	1283.64	1327.95	1490.83	1100.84	1382.06	1285.1	1164.44	1424.93	1274.62	1248.76	0.0313226	-0.0862881	0.0143352	-0.000350027	-0.0574355	0.00158737	-0.0144216	0.0299159	-0.0125529	-0.0819363	0.101934	-0.000385214	-0.0263698	0.0619075	0.0131216	0.0660525	0.0664391	0.0677075	0.0714657	0.0687647	0.0828303	0.070072	0.0652269	0.0844485	0.0655145	0.0667721	0.0669668	0.0722092	0.0831389	0.0883707	0.474208
ENSG00000231978	AL590103.1	processed_pseudogene	human	0	0	0	0	0	0	0	0	0	0	0	0	0	0	0	NA	NA	NA	NA	NA	NA	NA	NA	NA	NA	NA	NA	NA	NA	NA	NA	NA	NA	NA	NA	NA	NA	NA	NA	NA	NA	NA	NA	NA	NA	NA
ENSG00000187942	LDLRAD2	protein_coding	human	3.4189	5.16799	5.8491	4.68011	3.20124	2.4717	4.73047	5.13461	4.77635	5.19781	7.62323	5.72954	4.62433	2.40324	3.70139	0.379801	0.939108	1.66678	0.941452	-0.0802706	-0.513103	0.575445	-1.01738	-2.20795	0.591353	0.756321	1.29912	-0.988102	-0.418632	-1.45902	1.05118	0.924473	0.831418	0.917202	1.0953	1.32641	0.900569	0.950006	1.0225	0.905494	0.742369	0.826194	0.944422	1.36109	1.14204	0.36131
ENSG00000142798	HSPG2	protein_coding	human	10046.6	11703.3	8574.75	11111.7	10852.6	9301.95	11119.6	12673.1	7983.88	11684.5	10061.5	8635.22	11991	10058.7	10255.2	0.270782	0.309341	0.0187943	0.362587	0.194798	0.184009	0.109226	-0.113492	0.163734	0.0747433	-0.289079	-0.235047	-0.136795	-0.0090496	-0.169062	0.0543436	0.0610445	0.0662022	0.052027	0.056368	0.177617	0.0383575	0.0490536	0.173221	0.0493522	0.0624959	0.056812	0.0400683	0.100837	0.158426	4.98277
ENSG00000232037	AL590556.1	processed_pseudogene	human	0	0	0	0	0	0	0	0	0	0	0	0	0	0	0	NA	NA	NA	NA	NA	NA	NA	NA	NA	NA	NA	NA	NA	NA	NA	NA	NA	NA	NA	NA	NA	NA	NA	NA	NA	NA	NA	NA	NA	NA	NA
ENSG00000283234	AL590556.2	transcribed_unitary_pseudogene	human	0.173599	0	0	0	0	0	0.168875	0	0	0.180183	0	0.14777	0	0	0	1.22054	NA	NA	NA	NA	NA	-1.13359	NA	NA	-1.32153	NA	-0.746246	NA	NA	NA	4.08047	NA	NA	NA	NA	NA	4.08047	NA	NA	4.08047	NA	4.08047	NA	NA	NA	0.299116
ENSG00000219073	CELA3B	protein_coding	human	0.171761	0.214529	0	0	0	0	0.168454	0.217613	0	0.376285	0.183172	0.146035	0	0	0	1.22054	0.941774	NA	NA	NA	NA	-1.13359	-0.980163	NA	-0.261152	-0.482655	-0.746246	NA	NA	NA	4.08047	4.06594	NA	NA	NA	NA	4.08047	4.06602	NA	3.16667	4.06596	4.08047	NA	NA	NA	0.299116
ENSG00000285959	AL590556.3	lncRNA	human	0	0	0	0	0	0	0	0	0	0	0	0	0	0	0	NA	NA	NA	NA	NA	NA	NA	NA	NA	NA	NA	NA	NA	NA	NA	NA	NA	NA	NA	NA	NA	NA	NA	NA	NA	NA	NA	NA	NA	NA	NA
ENSG00000273610	RN7SL386P	misc_RNA	human	0	0	0	0	0	0	0	0	0	0	0	0	0	0	0	NA	NA	NA	NA	NA	NA	NA	NA	NA	NA	NA	NA	NA	NA	NA	NA	NA	NA	NA	NA	NA	NA	NA	NA	NA	NA	NA	NA	NA	NA	NA
ENSG00000201919	RNU6-1022P	snRNA	human	0	0	0	0	0	0	0	0	0	0	0	0	0	0	0	NA	NA	NA	NA	NA	NA	NA	NA	NA	NA	NA	NA	NA	NA	NA	NA	NA	NA	NA	NA	NA	NA	NA	NA	NA	NA	NA	NA	NA	NA	NA
ENSG00000142789	CELA3A	protein_coding	human	0.343522	0	0.202873	0.343276	0	0	0.654849	0	0.177629	0.356215	0.21295	0.478324	0.346115	0	0.298375	2.05262	NA	1.41939	1.94152	NA	NA	-0.110893	NA	-1.02734	-2.15552	1.55757	-0.623929	-1.95524	NA	-1.53991	3.58393	NA	4.08047	3.60905	NA	NA	2.59632	NA	4.08047	3.44055	4.08047	2.92289	3.53455	NA	3.83551	0.57273
ENSG00000278124	RN7SL186P	misc_RNA	human	0	0	0	0	0	0	0	0	0	0	0	0	0	0	0	NA	NA	NA	NA	NA	NA	NA	NA	NA	NA	NA	NA	NA	NA	NA	NA	NA	NA	NA	NA	NA	NA	NA	NA	NA	NA	NA	NA	NA	NA	NA
ENSG00000201273	RNU6-776P	snRNA	human	0	0	0	0	0	0	0	0	0	0	0	0	0	0	0	NA	NA	NA	NA	NA	NA	NA	NA	NA	NA	NA	NA	NA	NA	NA	NA	NA	NA	NA	NA	NA	NA	NA	NA	NA	NA	NA	NA	NA	NA	NA
ENSG00000228397	LINC01635	lncRNA	human	2.29678	4.2246	2.50767	3.31191	3.07064	3.09675	2.53672	4.23495	2.53587	3.33587	3.48011	1.8503	3.30124	3.08777	3.28406	-0.636595	0.697194	-0.140671	0.301146	-0.0457996	0.381847	0.946255	-0.742268	0.524199	1.35886	-0.832865	0.514229	-0.318208	0.434567	0.0948766	1.30362	0.972979	1.23998	1.08428	1.13595	1.15558	1.21343	0.96052	1.22513	1.09207	1.05477	1.38895	1.07119	1.13797	1.09097	-0.488327
ENSG00000218510	LINC00339	lncRNA	human	147.53	180.031	142.487	151.198	170.162	144.797	120.632	168.081	112.383	145.307	140.461	114.46	139.722	134.168	118.211	-0.36528	-0.172198	-0.261844	-0.50794	-0.245898	-0.27901	-0.125915	-0.0726484	-0.0172005	0.229006	-0.0887271	0.120112	0.2936	-0.0305709	0.239261	0.170454	0.158248	0.18023	0.174468	0.160108	0.181203	0.177323	0.150815	0.192516	0.159597	0.170957	0.184323	0.168268	0.173241	0.189534	-2.14299
ENSG00000070831	CDC42	protein_coding	human	6940.55	7448.64	5651.84	7108.93	7174.95	5695.5	7577.7	8267.18	5007.88	7932.49	6541.44	6081.48	7859.29	6343.27	6280.92	0.452078	0.27828	0.0859143	0.347072	0.265775	0.0459101	-0.0880716	-0.0110684	-0.0401442	-0.138122	-0.190968	-0.349642	-0.0501412	-0.217576	-0.290159	0.058584	0.0599442	0.0577664	0.0543579	0.0608489	0.0762127	0.0437324	0.0457254	0.0698667	0.0492827	0.0470104	0.04795	0.0439427	0.0686513	0.0670945	7.71675
ENSG00000285752	CDC42-AS1	lncRNA	human	0.65576	1.56693	0.809736	1.47705	1.01455	0.43616	1.10733	1.5914	0.334448	1.17201	1.29259	0.520677	1.49414	0.441137	0.859815	-1.22449	0.887655	-0.142759	1.04126	-0.012807	-2.05341	2.27819	-0.908985	-1.90509	2.17555	-1.04592	1.09322	-1.02714	-2.04454	-3.07572	2.35351	1.66768	2.08465	1.57626	1.88619	2.84009	1.94327	1.70305	3.29573	2.04853	1.88354	2.67139	1.60346	2.97901	2.20339	-0.520281
ENSG00000285794	AL031281.2	transcribed_processed_pseudogene	human	0	0	0	0	0	0	0	0	0	0	0	0	0	0	0	NA	NA	NA	NA	NA	NA	NA	NA	NA	NA	NA	NA	NA	NA	NA	NA	NA	NA	NA	NA	NA	NA	NA	NA	NA	NA	NA	NA	NA	NA	NA
ENSG00000230068	CDC42-IT1	lncRNA	human	11.8367	13.0928	9.36464	13.3868	12.3513	8.13473	14.6475	15.2812	7.40742	14.4841	11.7552	10.5976	15.3995	9.85677	10.7762	0.605214	0.499677	0.160145	0.731272	0.439672	-0.293324	0.138756	-0.0578423	-0.4545	-0.0761076	-0.338288	-0.429327	-0.262914	-0.722601	-1.0056	0.603881	0.56989	0.685465	0.564815	0.581403	0.750241	0.504074	0.49215	0.750452	0.504548	0.583222	0.616878	0.489547	0.649859	0.631557	1.00221
ENSG00000271428	AL031281.1	processed_pseudogene	human	0	0	0	0	0.162733	0	0	0.169619	0	0	0	0	0.159618	0.14088	0	NA	NA	NA	NA	0.921293	NA	NA	1.0595	NA	NA	NA	NA	0.88249	-0.526457	NA	NA	NA	NA	NA	4.08047	NA	NA	4.08047	NA	NA	NA	NA	4.08047	4.08047	NA	NA
ENSG00000162552	WNT4	protein_coding	human	19.1506	23.5686	21.8503	20.698	22.2249	19.794	10.2239	14.4993	13.0115	12.1518	15.4811	12.3251	12.235	12.1959	11.1433	-1.4647	-1.13561	-0.586926	-1.38506	-1.2286	-1.08634	0.0912946	-0.0974829	-0.498369	0.370512	0.545476	0.891553	0.18715	0.149133	0.313114	0.495667	0.422242	0.424782	0.452193	0.431244	0.484279	0.617365	0.511511	0.551732	0.576182	0.491808	0.572678	0.547311	0.576186	0.602642	-2.95501
ENSG00000285873	AL445253.1	lncRNA	human	2.80224	4.11324	3.12071	2.73803	2.77583	3.78928	1.17032	2.22828	2.54964	2.33276	2.69559	1.68362	0.964491	2.21509	2.193	-1.53818	-0.519819	-0.746298	-2.13451	-2.28248	-0.130136	-0.576785	-1.78004	0.611618	1.0643	-0.232233	0.811154	-0.142224	2.15426	2.00724	1.21379	0.959966	1.09682	1.2939	1.31073	1.0173	1.69143	1.40204	1.19887	1.27012	1.15697	1.43473	1.90559	1.43837	1.4133	-1.26725
ENSG00000266564	MIR4418	miRNA	human	0	0	0	0	0.182186	0	0	0.19265	0	0	0	0	0.180468	0.159376	0	NA	NA	NA	NA	0.921293	NA	NA	1.0595	NA	NA	NA	NA	0.88249	-0.526457	NA	NA	NA	NA	NA	4.08047	NA	NA	4.08047	NA	NA	NA	NA	4.08047	4.08047	NA	NA
ENSG00000234397	PPIAP34	processed_pseudogene	human	0	0	0	0	0	0	0	0	0	0	0	0	0	0	0	NA	NA	NA	NA	NA	NA	NA	NA	NA	NA	NA	NA	NA	NA	NA	NA	NA	NA	NA	NA	NA	NA	NA	NA	NA	NA	NA	NA	NA	NA	NA
ENSG00000279625	AL591122.1	TEC	human	0	0	0	0	0	0	0	0	0	0	0	0	0	0	0	NA	NA	NA	NA	NA	NA	NA	NA	NA	NA	NA	NA	NA	NA	NA	NA	NA	NA	NA	NA	NA	NA	NA	NA	NA	NA	NA	NA	NA	NA	NA
ENSG00000184677	ZBTB40	protein_coding	human	1132.66	1505.57	1244.08	1268.9	1457.97	1292.44	1005.33	1550.68	1131.05	1207.71	1320.76	998.645	1307.94	1325.05	1158.47	-0.418493	0.0354854	0.074902	-0.259981	0.0364961	0.118213	0.176309	0.00186751	0.0425253	0.490304	0.040702	0.510561	0.327169	0.0841348	0.388395	0.0847715	0.0762184	0.0791222	0.0760299	0.0777278	0.0915365	0.0725289	0.0626223	0.0819195	0.072325	0.0660697	0.0757122	0.0641705	0.079483	0.0792203	-4.93671
ENSG00000237200	ZBTB40-IT1	lncRNA	human	11.0199	16.3794	13.67	13.5627	15.291	15.7503	5.64045	11.7454	10.69	7.71192	10.7041	6.56174	9.22246	11.8705	10.4211	-2.1611	-0.733812	-0.673771	-1.28315	-0.918183	-0.257714	0.895605	-0.176611	0.413884	1.44798	0.0678192	1.50116	0.395443	0.661172	1.03219	0.670829	0.508291	0.53407	0.560305	0.507329	0.5077	0.827998	0.581162	0.588332	0.75078	0.602757	0.778283	0.640634	0.569302	0.6262	-3.22154
ENSG00000070886	EPHA8	protein_coding	human	0.593018	0.895428	1.70276	0.633348	0.984554	1.17292	0	0.556852	1.51627	0.198177	1.38699	1.0539	0.319236	0.894786	0.589274	-2.57295	-1.94975	1.04513	-2.76239	-1.02143	0.0503271	NA	0.892593	-1.0056	0.720002	3.01527	3.63767	1.76567	1.08975	2.84123	2.49039	2.13319	1.46295	2.45281	2.01311	1.80345	NA	2.80824	1.59675	4.06582	1.84564	2.03303	3.64659	2.22089	2.72661	-1.03315
ENSG00000276835	MIR6127	miRNA	human	0	0	0	0	0	0	0	0	0	0	0	0	0	0	0	NA	NA	NA	NA	NA	NA	NA	NA	NA	NA	NA	NA	NA	NA	NA	NA	NA	NA	NA	NA	NA	NA	NA	NA	NA	NA	NA	NA	NA	NA	NA
ENSG00000173372	C1QA	protein_coding	human	0	0	0	0	0	0	0	0	0	0	0	0	0	0	0	NA	NA	NA	NA	NA	NA	NA	NA	NA	NA	NA	NA	NA	NA	NA	NA	NA	NA	NA	NA	NA	NA	NA	NA	NA	NA	NA	NA	NA	NA	NA
ENSG00000159189	C1QC	protein_coding	human	0	0	0	0	0	0	0	0	0	0	0	0	0	0	0	NA	NA	NA	NA	NA	NA	NA	NA	NA	NA	NA	NA	NA	NA	NA	NA	NA	NA	NA	NA	NA	NA	NA	NA	NA	NA	NA	NA	NA	NA	NA
ENSG00000173369	C1QB	protein_coding	human	0	0	0	0	0	0	0	0	0	0	0	0	0	0	0	NA	NA	NA	NA	NA	NA	NA	NA	NA	NA	NA	NA	NA	NA	NA	NA	NA	NA	NA	NA	NA	NA	NA	NA	NA	NA	NA	NA	NA	NA	NA
ENSG00000133216	EPHB2	protein_coding	human	3552.93	4515.13	3637.6	3746.53	4349.23	3754.5	4000.53	5683.56	3946.75	4734.58	4752.6	3817.02	4822.9	4708.14	4147.87	0.470594	0.715383	0.688241	0.43996	0.703077	0.710715	-0.0130922	-0.0114173	0.0212832	0.280774	-0.0259634	0.234597	0.293759	0.00999411	0.280624	0.0558893	0.0548766	0.0521976	0.0478116	0.0672072	0.0756338	0.0457851	0.0611765	0.0715923	0.0535399	0.0507904	0.0518535	0.0577005	0.0805357	0.0678005	8.42011
ENSG00000265422	MIR4684	miRNA	human	0	0	0	0	0	0	0	0	0	0	0	0	0	0	0	NA	NA	NA	NA	NA	NA	NA	NA	NA	NA	NA	NA	NA	NA	NA	NA	NA	NA	NA	NA	NA	NA	NA	NA	NA	NA	NA	NA	NA	NA	NA
ENSG00000225952	AL512444.1	lncRNA	human	0	0	0	0	0	0	0	0	0	0	0	0	0	0	0	NA	NA	NA	NA	NA	NA	NA	NA	NA	NA	NA	NA	NA	NA	NA	NA	NA	NA	NA	NA	NA	NA	NA	NA	NA	NA	NA	NA	NA	NA	NA
ENSG00000264014	MIR4253	miRNA	human	0.169606	0.194015	0.158492	0.48867	0.369991	0.373464	0.283822	0.19265	0.181205	0	0	0	0.488832	0.374406	0.474835	-0.703018	-1.09864	-0.50416	0.860646	-0.040475	0.392565	1.56589	1.0595	0.896211	NA	NA	NA	-0.868462	0.435332	-0.456417	4.08047	4.08047	4.08047	2.96792	3.24684	3.31781	3.76555	4.08047	4.08047	NA	NA	NA	2.92269	3.24891	3.01215	-0.172288
ENSG00000215906	LACTBL1	protein_coding	human	0	0	0	0	0	0	0	0	0	0	0	0	0	0	0	NA	NA	NA	NA	NA	NA	NA	NA	NA	NA	NA	NA	NA	NA	NA	NA	NA	NA	NA	NA	NA	NA	NA	NA	NA	NA	NA	NA	NA	NA	NA
ENSG00000227868	TEX46	protein_coding	human	0.753773	1.67906	1.91396	0.990404	1.61524	0.721597	0.50977	2.05239	1.33729	1.11812	2.30457	1.40815	1.32989	1.01399	0.482779	-1.58705	0.528656	1.30711	-0.807638	0.570937	-1.45587	0.81433	0.0610357	-2.77513	2.17345	0.803836	2.92563	1.43397	-2.03259	-0.657862	2.36118	1.53691	1.44827	2.14029	1.53993	2.43211	2.84505	1.3245	1.84692	1.9311	1.25396	1.81859	1.80076	2.01834	2.99254	-0.67214
ENSG00000004487	KDM1A	protein_coding	human	2695.73	3075.6	2585.98	2863.07	2926.02	2644.61	2812.55	3275.06	2467.63	3009.13	2881.74	2525.07	3043.57	2801.01	2736.58	0.202782	0.185062	0.270117	0.189353	0.138677	0.271739	0.00380058	-0.0451508	0.00111724	0.0180565	0.0864286	0.0841003	-0.0195285	0.135392	0.0930913	0.0574485	0.059496	0.0575812	0.0541209	0.0626257	0.0691506	0.0475146	0.0539866	0.0649927	0.0524984	0.0529375	0.0516264	0.0517354	0.0665929	0.0619134	3.5298
ENSG00000240553	AL031428.1	lncRNA	human	0	0	0	0	0	0	0	0	0	0	0	0	0	0	0	NA	NA	NA	NA	NA	NA	NA	NA	NA	NA	NA	NA	NA	NA	NA	NA	NA	NA	NA	NA	NA	NA	NA	NA	NA	NA	NA	NA	NA	NA	NA
ENSG00000263793	MIR3115	miRNA	human	0	0	0	0	0	0	0	0	0	0	0	0	0	0	0	NA	NA	NA	NA	NA	NA	NA	NA	NA	NA	NA	NA	NA	NA	NA	NA	NA	NA	NA	NA	NA	NA	NA	NA	NA	NA	NA	NA	NA	NA	NA
ENSG00000266802	AL031428.2	miRNA	human	0	0	0	0.185172	0	0	0.170448	0	0	0	0	0	0.185776	0	0.160598	NA	NA	NA	1.03172	NA	NA	0.789963	NA	NA	NA	NA	NA	-1.04106	NA	-0.628535	NA	NA	NA	4.08047	NA	NA	4.08047	NA	NA	NA	NA	NA	4.08047	NA	4.08047	NA
ENSG00000169641	LUZP1	protein_coding	human	2349.08	2735.53	2150.88	2603.37	2656.79	2261.6	2717.63	3221.21	2162.85	2852.04	2617.85	2251.54	3051.04	2655.19	2595.06	0.413938	0.448008	0.359939	0.5076	0.45806	0.430975	0.111082	0.0110449	0.0701338	0.069738	-0.0863664	-0.037109	-0.0186016	-0.0247558	-0.0665008	0.0614045	0.064125	0.0601693	0.0551394	0.0689987	0.0754573	0.0488375	0.0615496	0.0696589	0.0579996	0.056871	0.0547151	0.056231	0.0754759	0.0655291	6.74117
ENSG00000229010	AL161672.1	processed_pseudogene	human	0	0	0	0	0	0	0	0	0	0	0	0	0	0	0	NA	NA	NA	NA	NA	NA	NA	NA	NA	NA	NA	NA	NA	NA	NA	NA	NA	NA	NA	NA	NA	NA	NA	NA	NA	NA	NA	NA	NA	NA	NA
ENSG00000206935	RNU6-514P	snRNA	human	0	0	0	0	0	0	0	0	0	0	0	0	0	0	0	NA	NA	NA	NA	NA	NA	NA	NA	NA	NA	NA	NA	NA	NA	NA	NA	NA	NA	NA	NA	NA	NA	NA	NA	NA	NA	NA	NA	NA	NA	NA
ENSG00000252578	RNU6-135P	snRNA	human	0	0	0	0	0	0	0	0	0	0	0	0	0	0	0	NA	NA	NA	NA	NA	NA	NA	NA	NA	NA	NA	NA	NA	NA	NA	NA	NA	NA	NA	NA	NA	NA	NA	NA	NA	NA	NA	NA	NA	NA	NA
ENSG00000179546	HTR1D	protein_coding	human	897.861	1245.97	950.082	931.077	1295.12	983.821	799.373	1514.22	889.981	1082.46	1125.6	820.99	1178.23	1201.24	881.643	-0.17977	0.352503	0.177044	-0.268993	0.53058	0.21226	-0.0720702	0.178968	0.034624	0.568068	-0.174124	0.373521	0.830558	-0.315858	0.491953	0.0803205	0.0731344	0.0798727	0.0755854	0.0717824	0.0929268	0.0762641	0.0636221	0.0935101	0.0734306	0.0740994	0.0818214	0.0670762	0.0851122	0.089893	-2.23816
ENSG00000215381	AL109936.2	processed_pseudogene	human	0	0	0	0	0	0	0	0	0	0	0	0	0	0	0	NA	NA	NA	NA	NA	NA	NA	NA	NA	NA	NA	NA	NA	NA	NA	NA	NA	NA	NA	NA	NA	NA	NA	NA	NA	NA	NA	NA	NA	NA	NA
ENSG00000261326	LINC01355	lncRNA	human	92.2053	120.451	92.2499	103.098	116.743	94.7311	83.511	124.239	76.7146	98.3396	98.0506	74.5787	106.399	97.3252	85.5786	-0.356031	0.032166	-0.142294	-0.21238	0.0408857	-0.136199	0.16099	0.0108359	0.00607823	0.423291	-0.173314	0.230133	0.283742	-0.174811	0.0860812	0.220423	0.19847	0.234479	0.225256	0.196425	0.23392	0.230367	0.180476	0.250604	0.201396	0.217408	0.240655	0.207911	0.2143	0.244665	-1.61522
ENSG00000284726	AL109936.8	lncRNA	human	0	0	0	0	0	0	0	0	0	0	0	0	0	0	0	NA	NA	NA	NA	NA	NA	NA	NA	NA	NA	NA	NA	NA	NA	NA	NA	NA	NA	NA	NA	NA	NA	NA	NA	NA	NA	NA	NA	NA	NA	NA
ENSG00000125944	HNRNPR	protein_coding	human	7029.1	7782.42	6145.92	7198.57	7478.92	6087.64	7298.54	8392.42	5400.87	7853.56	6896.62	6219.97	7753.44	6562.83	6316.72	0.292351	0.194648	0.110082	0.181541	0.175909	0.02135	-0.0937224	-0.0173418	-0.088697	-0.0619394	-0.083126	-0.165618	0.0255356	-0.151976	-0.148888	0.0503454	0.0546924	0.0511785	0.046864	0.0549148	0.0804459	0.0395886	0.0480119	0.0792557	0.0484294	0.0487565	0.04529	0.0433101	0.0782048	0.0759819	5.80691
ENSG00000125945	ZNF436	protein_coding	human	426.833	517.44	453.146	427.44	506.728	443.714	415.02	587.647	444.718	497.78	521.703	434.295	491.668	500.292	429.048	0.161264	0.31265	0.490375	-0.0211683	0.336081	0.381347	-0.165974	0.0223002	-0.109284	0.188178	0.179328	0.346028	0.388089	0.0486185	0.413687	0.108245	0.111111	0.117037	0.107843	0.103569	0.115465	0.0989329	0.0979665	0.116275	0.102134	0.111686	0.108829	0.094806	0.10195	0.106863	1.48981
ENSG00000249087	ZNF436-AS1	lncRNA	human	54.8975	76.7144	60.7506	56.5711	74.7523	57.6838	36.8983	74.598	44.9151	54.187	60.3873	42.4632	54.4257	55.565	40.1126	-0.831951	-0.123694	-0.235851	-0.964299	-0.130047	-0.487215	-0.117621	-0.00508472	-0.251265	0.740475	-0.108638	0.612403	0.866469	-0.355708	0.492157	0.267952	0.237029	0.251648	0.293093	0.226756	0.268624	0.340568	0.236361	0.290132	0.273379	0.260081	0.29286	0.292987	0.267381	0.342699	-3.10485
ENSG00000201405	AL109936.1	misc_RNA	human	0	0	0	0	0	0	0	0	0	0	0	0	0	0	0	NA	NA	NA	NA	NA	NA	NA	NA	NA	NA	NA	NA	NA	NA	NA	NA	NA	NA	NA	NA	NA	NA	NA	NA	NA	NA	NA	NA	NA	NA	NA
ENSG00000271420	AL109936.3	lncRNA	human	0.169606	0.194015	0.338677	0.180913	0.187804	0.358833	0	0	0.32364	0	0.18866	0.165187	0	0.198997	0.190834	-0.703018	-1.09864	0.457628	-0.89183	-1.00226	0.392564	NA	NA	-0.0655587	NA	1.55757	1.17731	NA	1.3971	1.29502	4.08047	4.08047	3.37103	4.08047	4.08047	3.36485	NA	NA	3.38331	NA	4.08047	4.08047	NA	4.08047	4.08047	-0.172288
ENSG00000204219	TCEA3	protein_coding	human	8.44586	12.0421	12.2503	8.92235	11.7927	11.7342	5.04675	11.0092	11.1852	7.6528	11.6936	8.46619	7.94747	10.8667	8.35452	-1.13516	-0.35251	0.312607	-1.20712	-0.303186	0.130395	-0.0516424	0.0514491	-0.184384	0.825197	0.665661	1.46398	0.938481	0.433796	1.34939	0.72238	0.580434	0.569706	0.686445	0.569818	0.584001	0.880817	0.590303	0.584245	0.737669	0.583443	0.71841	0.700713	0.589987	0.704864	-1.57142
ENSG00000232482	AL357134.1	processed_pseudogene	human	0	0	0	0	0	0	0	0	0	0	0	0	0	0	0	NA	NA	NA	NA	NA	NA	NA	NA	NA	NA	NA	NA	NA	NA	NA	NA	NA	NA	NA	NA	NA	NA	NA	NA	NA	NA	NA	NA	NA	NA	NA
ENSG00000088280	ASAP3	protein_coding	human	181.337	205.784	178.857	188.9	195.405	195.263	154.01	179.9	158.58	167.355	166.233	146.642	164.501	173.377	167.595	-0.318747	-0.336633	-0.15338	-0.398588	-0.420989	0.0416925	-0.0625381	-0.0807372	0.193831	0.0160276	0.187417	0.182361	0.00896592	0.464059	0.450163	0.154479	0.15479	0.156591	0.145844	0.149707	0.154987	0.159481	0.164987	0.169695	0.167093	0.171065	0.171412	0.156921	0.164162	0.160318	-2.06336
ENSG00000007968	E2F2	protein_coding	human	808.064	795.6	704.371	903.319	774.434	714.332	889.309	751.043	614.923	790.144	686.298	695.921	861.59	675.424	787.351	0.219717	-0.221572	0.0245	0.342127	-0.207292	0.00164162	0.139687	0.0151018	-0.0234755	-0.404844	0.247084	-0.178479	-0.518415	0.210975	-0.329917	0.0834139	0.0942815	0.0881126	0.0775894	0.0885946	0.0945696	0.0705187	0.0911511	0.0937616	0.087152	0.0926481	0.0821785	0.0758959	0.0929125	0.0841148	2.63406
ENSG00000235052	AL021154.1	lncRNA	human	13.9339	16.7962	17.6578	13.7066	16.1399	19.6037	6.79251	10.9029	15.948	9.18531	13.4349	11.1234	8.19241	14.7226	12.5883	-1.30037	-1.04272	-0.135424	-1.72946	-1.07982	0.110977	-0.417889	-0.0363418	0.245325	0.286898	0.908778	1.17949	0.678309	1.19301	1.84677	0.573759	0.50889	0.479498	0.593236	0.51734	0.473866	0.748895	0.588115	0.484589	0.640257	0.527585	0.593256	0.689355	0.527945	0.603963	-2.2664
ENSG00000117318	ID3	protein_coding	human	3724.77	4818.93	5217.8	4225.92	4973.24	5523.44	3092.35	4838.9	5571.34	3567.52	5149.49	4090.8	4239.64	5544.48	4850.79	-0.632069	-0.22897	0.549444	-0.417992	-0.03468	0.63348	0.231206	0.196149	0.0834098	0.43887	0.779757	1.19819	0.414853	0.670055	1.06207	0.0631597	0.0643628	0.062939	0.0608571	0.0640451	0.0706084	0.0485633	0.0482531	0.0617872	0.0517231	0.0518838	0.0521177	0.047858	0.0578925	0.058581	-10.0075
ENSG00000285802	AL450043.1	lncRNA	human	7.78854	10.9615	7.39122	9.68412	10.5617	8.93541	8.34884	12.4972	7.27357	9.45831	8.93209	6.27978	11.0965	10.1765	9.37883	-0.21153	0.325378	-0.165432	0.211404	0.355007	0.300337	0.441444	0.0353944	0.467298	0.575308	-0.497774	0.0609935	0.176804	-0.0530843	0.100281	0.690009	0.602199	0.735603	0.641346	0.594199	0.655885	0.67919	0.559058	0.738718	0.637378	0.68845	0.782614	0.596171	0.609454	0.656888	-0.306561
ENSG00000197880	MDS2	lncRNA	human	3.95783	4.45379	4.33017	4.21895	3.9029	5.21284	1.50323	1.19633	3.03087	1.53451	2.09859	1.8939	1.18232	2.51736	2.82942	-2.08456	-2.11394	-1.11838	-2.01061	-3.37846	-0.44425	0.0644204	-1.17588	0.667976	-0.0427592	1.01115	0.966592	-1.27927	2.90991	1.57122	1.17926	1.08749	1.02139	1.09561	1.38175	0.925862	1.58471	1.96082	1.10881	1.62065	1.36019	1.44772	1.88739	1.50393	1.20787	-1.76768
ENSG00000229239	AL451000.1	unprocessed_pseudogene	human	0	0	0	0	0	0	0	0	0	0	0	0	0	0	0	NA	NA	NA	NA	NA	NA	NA	NA	NA	NA	NA	NA	NA	NA	NA	NA	NA	NA	NA	NA	NA	NA	NA	NA	NA	NA	NA	NA	NA	NA	NA
ENSG00000142676	RPL11	protein_coding	human	3934.38	4665.57	3842.65	4159.11	4345.93	3655.48	4076.17	5024.17	3478.54	4543.24	4416.88	3738.1	4483.58	3935.54	3768.34	0.194756	0.278973	0.309354	0.167975	0.177724	0.116055	-0.0103687	-0.100364	-0.192716	0.119873	0.0320618	0.131023	0.0408911	-0.0587517	-0.0402579	0.0691662	0.0706714	0.0663873	0.061111	0.0799457	0.106704	0.0533715	0.0686305	0.102183	0.0621956	0.0578868	0.0577024	0.0628996	0.177542	0.0985647	2.81577
ENSG00000236810	ELOA-AS1	lncRNA	human	27.7557	31.4644	23.8328	25.7568	32.168	27.0777	23.7073	33.4922	21.3307	28.8469	24.7524	21.8531	27.6093	28.6747	23.0812	0.000947385	-0.0528566	-0.249948	-0.426442	0.125723	0.0563007	-0.410007	0.182062	0.307084	-0.016657	-0.199605	-0.234722	0.583513	-0.0683574	0.494134	0.373069	0.356586	0.402517	0.385207	0.337845	0.382917	0.397928	0.338967	0.424828	0.367913	0.402063	0.419044	0.36692	0.364468	0.413026	0.00253943
ENSG00000011007	ELOA	protein_coding	human	1458.45	1675.63	1410.51	1543.24	1599.15	1359.99	1649.7	1959.83	1395.85	1781.87	1714.8	1493.19	1804.55	1589.75	1533.26	0.476103	0.47644	0.558582	0.453976	0.442239	0.414268	-0.00486054	-0.0326211	-0.144832	0.0361061	0.0839494	0.0994274	0.0195839	-0.0258749	-0.0291786	0.0775179	0.0757081	0.0752643	0.0722521	0.0775117	0.0857653	0.0608929	0.061413	0.0742672	0.0650718	0.0622919	0.0657448	0.0608668	0.0743562	0.0719901	6.14185
ENSG00000057757	PITHD1	protein_coding	human	653.353	688.137	605.834	709.451	677.677	576.467	788.504	812.66	601.856	775.378	720.172	673.426	824.528	677.522	701.602	0.631639	0.419749	0.609705	0.66929	0.462622	0.43243	0.0539476	0.043658	-0.177462	-0.176168	0.191092	-0.0054371	-0.175625	-0.0273447	-0.226048	0.0871465	0.0936942	0.0909955	0.0864223	0.0911861	0.100019	0.0794859	0.0884291	0.0981388	0.0861758	0.0905393	0.0845501	0.0831017	0.0967245	0.094332	7.24801
ENSG00000011009	LYPLA2	protein_coding	human	984.474	1068.16	904.825	1086.13	1028.75	925.66	1030.51	1057.51	803.86	1011.4	929.591	856.011	1075.13	913.746	962.827	0.100345	-0.061801	0.0493392	0.188306	-0.0778996	0.0511594	0.10418	-0.0154277	0.000688095	-0.126116	0.111739	-0.0344809	-0.234483	0.130698	-0.127026	0.08359	0.0810784	0.0820893	0.0829566	0.0809624	0.0926989	0.0785273	0.0702267	0.0864326	0.0754564	0.0738999	0.0780163	0.0750216	0.0836531	0.0884796	1.20045
ENSG00000117308	GALE	protein_coding	human	1042.6	1111.68	901.144	1134.52	1066.76	903.799	1195.39	1217.78	835.262	1180.14	1026.81	957.582	1231.85	987.839	1044.19	0.438402	0.245461	0.233476	0.486227	0.223948	0.182233	0.0649286	-0.0197545	-0.0518839	-0.157684	-0.0108678	-0.188513	-0.231272	-0.0396903	-0.29351	0.0718355	0.0804346	0.0828892	0.0676961	0.073862	0.0859884	0.0615887	0.0740815	0.092625	0.0736172	0.0846359	0.0770771	0.0635753	0.0817335	0.0779664	6.10286
ENSG00000117305	HMGCL	protein_coding	human	186.946	196.818	177.461	180.094	190.167	176.868	143.688	156.132	135.278	156.716	149.452	143.46	142.017	142.596	134.729	-0.338692	-0.653349	-0.2902	-0.697934	-0.644861	-0.371446	-0.342191	0.0083185	-0.0820348	-0.277819	0.36236	0.0651394	0.0841665	0.275667	0.336678	0.146673	0.150299	0.152386	0.14922	0.145666	0.168269	0.159979	0.161863	0.183752	0.160575	0.167821	0.164156	0.161987	0.178919	0.183478	-2.30917
ENSG00000179163	FUCA1	protein_coding	human	240.767	282.107	237.565	254.672	266.067	238.793	206.834	253.226	192.185	229.095	227.121	193.707	227.376	213.966	204.79	-0.330199	-0.268066	-0.163964	-0.359919	-0.349388	-0.213742	-0.0128977	-0.080151	-0.0505771	0.0979594	0.105012	0.182869	0.0418042	0.137669	0.156688	0.133603	0.127396	0.13529	0.130844	0.129447	0.141477	0.13438	0.125573	0.146052	0.129529	0.132342	0.13955	0.130656	0.140255	0.143499	-2.47149
ENSG00000188822	CNR2	protein_coding	human	0.173599	0.628899	0	0.171638	0	0.40838	0.327845	0.63856	0.348026	0.762091	0.537074	0.14777	0.173057	0.414027	0.547628	1.22054	2.64426	NA	1.03172	NA	2.33205	-0.171807	-2.67859	1.87355	1.43126	-2.19088	-0.746246	-1.04106	2.37375	1.30111	4.08047	2.68018	NA	4.08047	NA	3.16556	3.32944	2.62922	3.24851	2.3404	2.78055	4.08047	4.08047	3.08677	2.6943	0.299116
ENSG00000229106	BTBD6P1	processed_pseudogene	human	0	0	0	0	0	0	0	0	0	0	0	0	0	0	0	NA	NA	NA	NA	NA	NA	NA	NA	NA	NA	NA	NA	NA	NA	NA	NA	NA	NA	NA	NA	NA	NA	NA	NA	NA	NA	NA	NA	NA	NA	NA
ENSG00000232557	AL590609.2	lncRNA	human	0	0	0	0	0	0	0	0	0	0	0	0	0	0	0	NA	NA	NA	NA	NA	NA	NA	NA	NA	NA	NA	NA	NA	NA	NA	NA	NA	NA	NA	NA	NA	NA	NA	NA	NA	NA	NA	NA	NA	NA	NA
ENSG00000264926	MIR378F	miRNA	human	0	0	0	0	0	0	0	0	0	0	0	0	0	0	0	NA	NA	NA	NA	NA	NA	NA	NA	NA	NA	NA	NA	NA	NA	NA	NA	NA	NA	NA	NA	NA	NA	NA	NA	NA	NA	NA	NA	NA	NA	NA
ENSG00000230228	H3P1	processed_pseudogene	human	0.169606	0.194015	0.361364	0.352552	0.187804	0.161958	0.15897	0	0.177629	0	0.21295	0.186253	0.173057	0	0.149187	-0.703018	-1.09864	0.457628	0.0699548	-1.00226	-0.569223	0.789963	NA	-1.02734	NA	1.55757	1.17731	-1.04106	NA	-0.628535	4.08047	4.08047	3.29499	3.33996	4.08047	4.08047	4.08047	NA	4.08047	NA	4.08047	4.08047	4.08047	NA	4.08047	-0.172288
ENSG00000189266	PNRC2	protein_coding	human	1437.07	1603.91	1286.27	1473.23	1564.82	1284.81	1552.05	1836.43	1212.94	1680.2	1510.84	1349.96	1686.78	1471.46	1387.26	0.414517	0.343901	0.302157	0.310666	0.362255	0.240844	-0.0868252	0.0192405	-0.0613521	-0.0345419	-0.0403802	-0.0954814	0.0825206	-0.118724	-0.0586681	0.0663967	0.0737786	0.0771645	0.0671229	0.0752766	0.0831093	0.0573909	0.0714823	0.0856601	0.064843	0.075441	0.0684507	0.0664585	0.0819912	0.0762635	6.24304
ENSG00000188529	SRSF10	protein_coding	human	3737.27	3969.08	3289.15	3905.94	3828.64	3301.73	3912.2	4087.75	2911.4	3975.86	3504.27	3290.88	4010.87	3386.59	3451.13	0.260333	0.0465479	0.0946614	0.203582	0.0363487	0.042803	-0.0398409	-0.00875262	-0.0512816	-0.178143	0.0495367	-0.148965	-0.136061	0.00896274	-0.149087	0.0530966	0.054881	0.0590486	0.0510833	0.057345	0.0810912	0.043753	0.0515144	0.0819777	0.0484012	0.054083	0.0522359	0.0488193	0.0793462	0.0763172	4.903
ENSG00000215905	AL590609.1	processed_pseudogene	human	0	0	0	0	0	0	0	0	0	0	0	0	0	0	0	NA	NA	NA	NA	NA	NA	NA	NA	NA	NA	NA	NA	NA	NA	NA	NA	NA	NA	NA	NA	NA	NA	NA	NA	NA	NA	NA	NA	NA	NA	NA
ENSG00000225315	AL591178.1	lncRNA	human	0	0.1846	0	0	0.325465	0.165113	0	0.527141	0.141278	0.170474	0.15774	0	0.319236	0.449127	0.161583	NA	1.29666	NA	NA	1.81076	1.35433	NA	0.471209	0.896211	1.07291	-0.83787	NA	1.76567	-0.448316	1.29502	NA	4.05588	NA	NA	3.63764	4.08047	NA	2.83802	4.08047	4.05584	4.05589	NA	3.64659	3.03271	4.08047	NA
ENSG00000142661	MYOM3	protein_coding	human	527.517	622.665	551.904	565.103	598.653	574.49	447.865	562.103	482.287	493.518	522.663	442.929	507.796	522.841	493.641	-0.396734	-0.298609	-0.0475545	-0.385196	-0.32826	0.00440671	0.028137	-0.0279913	0.0513748	0.133733	0.252869	0.365996	0.0884408	0.334659	0.400128	0.0943278	0.100018	0.094295	0.0889816	0.0922445	0.0998555	0.0956472	0.103407	0.105521	0.105237	0.105804	0.10121	0.0936541	0.103716	0.101141	-4.2059
ENSG00000230703	MYOM3-AS1	lncRNA	human	0	0	0	0	0	0	0	0	0	0	0	0	0	0	0	NA	NA	NA	NA	NA	NA	NA	NA	NA	NA	NA	NA	NA	NA	NA	NA	NA	NA	NA	NA	NA	NA	NA	NA	NA	NA	NA	NA	NA	NA	NA
ENSG00000142677	IL22RA1	protein_coding	human	163.244	222.031	169.8	160.974	213.878	174.944	132.74	242.072	151.786	187.341	192.748	142.259	179.089	190.696	144.551	-0.273003	0.222176	0.0451136	-0.54329	0.207015	0.0663162	-0.253884	-0.015077	0.0198864	0.532262	-0.177046	0.334956	0.783026	-0.139495	0.620118	0.165155	0.146888	0.161419	0.177663	0.149644	0.169635	0.177369	0.130368	0.164117	0.144489	0.142785	0.161729	0.161025	0.153053	0.182614	-1.65301
ENSG00000185436	IFNLR1	protein_coding	human	131.225	167.335	132.465	148.454	161.922	140.916	118.353	165.78	113.858	133.95	135.296	105.481	146.743	139.095	127.447	-0.404199	-0.0702166	-0.157762	-0.209567	-0.0727231	-0.0370602	0.211909	-0.0015384	0.11973	0.369579	-0.0860361	0.262878	0.167323	0.0379732	0.182879	0.192528	0.167973	0.185861	0.176714	0.170018	0.1856	0.184661	0.154524	0.187035	0.174689	0.170396	0.195986	0.164255	0.172387	0.180124	-2.09943
ENSG00000230023	LINC02800	lncRNA	human	2.59864	2.80249	2.31289	2.57989	2.6678	2.15843	0.495879	0.387233	0.177629	0.554392	0.396122	0.478324	0.332675	0.14088	0.149187	-2.66408	-3.90673	-3.33546	-3.72324	-3.83288	-4.36297	-1.01885	-0.00018122	-1.02734	-1.11537	0.498337	-0.623929	-0.0792797	-0.526457	-0.628535	1.47928	1.53645	1.61131	1.58347	1.56536	1.67702	2.87306	3.19717	4.08047	2.76177	3.16612	2.92289	3.3545	4.08047	4.08047	-1.80093
ENSG00000232298	GRHL3-AS1	lncRNA	human	0	0	0	0	0	0	0	0	0	0	0	0	0	0	0	NA	NA	NA	NA	NA	NA	NA	NA	NA	NA	NA	NA	NA	NA	NA	NA	NA	NA	NA	NA	NA	NA	NA	NA	NA	NA	NA	NA	NA	NA	NA
ENSG00000158055	GRHL3	protein_coding	human	31.8033	39.4917	39.922	37.3986	35.1451	37.1384	15.9193	17.976	25.2112	16.3857	25.9639	20.4609	17.3466	19.2254	21.6437	-1.93696	-1.47031	-0.538496	-1.39321	-2.00261	-0.895455	0.57174	-0.528848	-0.358041	0.503994	0.933499	1.41729	-0.582765	1.10702	0.501702	0.405821	0.329191	0.320936	0.351446	0.361625	0.343607	0.526598	0.450536	0.394277	0.499884	0.384946	0.471841	0.474365	0.452117	0.442037	-4.77295
ENSG00000001460	STPG1	protein_coding	human	262.744	369.001	250.514	272.656	353.615	255.306	253.857	444.21	225.047	341.939	323.986	232.168	341.678	315.767	245.044	0.0410845	0.563623	0.0928151	-0.0404126	0.542876	0.0864365	-0.064498	-0.0200523	-0.00784382	0.558051	-0.470144	0.0682154	0.614184	-0.454166	0.136747	0.128926	0.115664	0.134018	0.127447	0.128637	0.146651	0.122356	0.109837	0.146024	0.109823	0.115881	0.13003	0.121576	0.139986	0.140903	0.318667
ENSG00000001461	NIPAL3	protein_coding	human	590.265	760.002	564.539	647.281	748.598	603.099	464.807	716.174	417.766	556.974	532.979	403.159	605.375	563.755	478.984	-0.657369	-0.26021	-0.575427	-0.558297	-0.209313	-0.421787	0.116277	0.0519742	0.152733	0.43409	-0.314445	0.0986562	0.38063	-0.211104	0.146532	0.0992262	0.0949115	0.104007	0.0936577	0.0979529	0.110387	0.0930557	0.0905008	0.114224	0.0919172	0.0979138	0.104845	0.0910422	0.107342	0.104646	-6.62496
ENSG00000286061	RCAN3AS	lncRNA	human	1.12267	1.56667	1.69141	2.04763	1.79355	2.97126	1.46233	1.66505	2.74881	0.987184	1.59221	1.18383	2.14116	3.07195	3.2404	-1.11871	-0.337991	0.432517	0.561525	0.153505	1.61598	1.69007	0.486377	1.1796	0.801888	0.767861	1.55949	-0.374491	1.4533	1.06771	1.92148	1.55196	1.44462	1.3541	1.45443	1.18249	1.74779	1.55924	1.17918	2.05753	1.52335	1.86894	1.35203	1.16734	1.1105	-0.582213
ENSG00000117602	RCAN3	protein_coding	human	1269.67	1519.7	1168	1326.31	1472.61	1229.75	1222.57	1616.94	1037.17	1395.66	1283.77	1072.14	1414.12	1304.88	1176.77	0.0136388	0.127672	-0.0349242	-0.0498169	0.133447	0.0503778	-0.0464898	0.00752309	0.0852098	0.149535	-0.16118	-0.031953	0.214429	-0.0806231	0.111158	0.0675843	0.0698737	0.0690215	0.0646207	0.0662881	0.0819122	0.0623316	0.0637642	0.082848	0.0672144	0.0688072	0.0675842	0.0608189	0.0782066	0.0793463	0.201804
ENSG00000264443	NCMAP-DT	lncRNA	human	1.03996	0.953211	0.821423	0.500254	0.703789	0.447345	0.554873	0.613597	0.334448	0.974569	0.755512	0.835949	0.180468	0.159376	0	0.274238	-0.516313	-0.171669	-2.4088	-1.55528	-2.08501	-2.66744	-1.0787	-1.90509	-0.762665	0.329548	-0.429896	0.88249	-0.526457	NA	1.96138	2.09448	2.16921	2.86861	2.41731	3.02606	2.69218	2.57397	3.29573	2.02842	2.26794	2.12883	4.08047	4.08047	NA	0.139819
ENSG00000184454	NCMAP	protein_coding	human	30.8915	30.3319	28.5244	33.6306	29.7422	31.2236	19.618	12.6278	16.9541	15.6204	14.2802	16.2619	17.1782	16.5175	20.27	-1.13387	-2.10101	-1.19658	-1.04762	-1.90533	-0.883481	0.104015	0.151679	0.308978	-0.905689	0.872435	-0.0445348	-0.835012	1.02791	0.17128	0.37572	0.42296	0.426942	0.352439	0.404301	0.363899	0.451723	0.602987	0.518444	0.539512	0.603549	0.540722	0.498604	0.50556	0.441151	-3.01787
ENSG00000227312	AL445686.1	processed_pseudogene	human	0.2994	0.344826	0.279873	0.319341	0.481714	0.285387	0	0.155891	0	0	0	0	0.145929	0.128999	0	-1.58516	-1.98473	-1.38523	-1.7729	-0.92777	-1.44701	NA	1.0595	NA	NA	NA	NA	0.88249	-0.526457	NA	3.78133	3.6193	3.88909	3.71188	2.94789	3.94076	NA	4.08047	NA	NA	NA	NA	4.08047	4.08047	NA	-0.419206
ENSG00000239106	AL445686.2	misc_RNA	human	0	0	0	0	0	0	0	0	0	0	0	0	0	0	0	NA	NA	NA	NA	NA	NA	NA	NA	NA	NA	NA	NA	NA	NA	NA	NA	NA	NA	NA	NA	NA	NA	NA	NA	NA	NA	NA	NA	NA	NA	NA
ENSG00000133226	SRRM1	protein_coding	human	3878.23	4256.61	3488.13	4124.15	4261.37	3550.19	3850.81	4356.56	2963.49	3959.45	3558.09	3244.8	4213.43	3618.88	3502.89	0.0506253	-0.0804176	-0.0627527	0.0396611	0.0180507	-0.0761644	0.00636725	0.0992746	-0.0140546	-0.0950711	0.0188993	-0.0966941	0.00932891	-0.091731	-0.105423	0.0577684	0.0556018	0.0538632	0.0503869	0.0647143	0.0664494	0.0480493	0.0563964	0.0623008	0.054103	0.0491448	0.0529845	0.054533	0.0697069	0.0595706	0.876349
ENSG00000284699	AL445648.1	lncRNA	human	0	0	0.180185	0	0.182186	0	0	0.19265	0.15682	0	0.18866	0.165187	0.180468	0.159376	0	NA	NA	1.41939	NA	0.921293	NA	NA	1.0595	-1.02734	NA	1.55757	1.17731	0.88249	-0.526457	NA	NA	NA	4.08047	NA	4.08047	NA	NA	4.08047	4.08047	NA	4.08047	4.08047	4.08047	4.08047	NA	NA
ENSG00000169504	CLIC4	protein_coding	human	2819.48	2996.6	2376.42	2792.96	2861.62	2503.41	2629.44	2842.68	1965.76	2808.52	2355.05	2229.27	2645.49	2366.04	2311.5	0.0709086	-0.156754	-0.238601	-0.148019	-0.196468	-0.144905	-0.201972	-0.0379871	0.0937552	-0.192233	-0.0802699	-0.292818	-0.0168698	0.054029	0.0142382	0.0579731	0.062667	0.0608012	0.05618	0.0653608	0.08886	0.0461011	0.0579901	0.0871508	0.0530336	0.055862	0.0518644	0.0539696	0.0873578	0.0833698	1.22313
ENSG00000238482	RNU6-1208P	snRNA	human	0	0	0	0	0	0	0	0	0	0	0	0	0	0	0	NA	NA	NA	NA	NA	NA	NA	NA	NA	NA	NA	NA	NA	NA	NA	NA	NA	NA	NA	NA	NA	NA	NA	NA	NA	NA	NA	NA	NA	NA	NA
ENSG00000020633	RUNX3	protein_coding	human	335.735	375.899	344.72	358.779	344.709	358.251	325.504	348.042	329.387	339.474	349.776	311.947	332.195	334.483	345.445	-0.0323959	-0.0946521	0.227114	-0.0295674	-0.272109	0.269476	0.0197184	-0.176604	0.0415739	-0.0262479	0.323211	0.276237	-0.211445	0.544273	0.309465	0.110462	0.115199	0.110992	0.10846	0.112205	0.119803	0.108782	0.117255	0.121175	0.115083	0.116987	0.112731	0.111491	0.121959	0.119495	-0.293278
ENSG00000278034	MIR6731	miRNA	human	0.173599	0.0922998	0	0	0	0	0.168875	0.0939515	0	0.26542	0.0788701	0.14777	0	0	0	1.22054	0.766694	NA	NA	NA	NA	-1.13359	-0.806158	NA	-0.41623	-0.30784	-0.746246	NA	NA	NA	4.08047	4.0717	NA	NA	NA	NA	4.08047	4.07175	NA	3.57404	4.07171	4.08047	NA	NA	NA	0.299116
ENSG00000229162	AL445471.1	lncRNA	human	0.339211	0.66493	0.497169	0.361827	0.375609	0.489029	0	0.281854	0.298098	0.255711	0.425271	0.165187	0	0.167366	0.161583	-1.73689	-0.238314	-0.561196	-1.9236	-2.02912	-0.627653	NA	-1.69627	-0.0655592	1.42894	-0.279692	1.17731	NA	1.3971	1.29502	3.60213	2.64787	2.93391	3.5363	3.44246	3.00335	NA	3.84078	3.48432	3.90439	3.05937	4.08047	NA	4.08047	4.08047	-0.482184
ENSG00000261025	AL445471.2	lncRNA	human	0	0	0	0	0	0.39375	0	0	0.333641	0	0	0	0	0.397995	0.381667	NA	NA	NA	NA	NA	2.29249	NA	NA	1.8265	NA	NA	NA	NA	2.33142	2.22444	NA	NA	NA	NA	NA	3.47494	NA	NA	3.58004	NA	NA	NA	NA	3.38501	3.48519	NA
ENSG00000264371	MIR4425	miRNA	human	0.410569	0.471706	0.38475	0.439146	0.456578	0.394526	0	0	0	0	0	0	0	0	0	-2.05847	-2.45673	-1.86069	-2.25039	-2.36051	-1.92908	NA	NA	NA	NA	NA	NA	NA	NA	NA	3.32793	3.19215	3.41671	3.26517	3.17797	3.45347	NA	NA	NA	NA	NA	NA	NA	NA	NA	-0.618543
ENSG00000285823	LINC02793	lncRNA	human	0	0	0	0	0	0	0	0	0	0	0	0	0	0	0	NA	NA	NA	NA	NA	NA	NA	NA	NA	NA	NA	NA	NA	NA	NA	NA	NA	NA	NA	NA	NA	NA	NA	NA	NA	NA	NA	NA	NA	NA	NA
ENSG00000233755	AL050344.1	lncRNA	human	0	0	0	0	0	0	0	0	0	0	0	0	0	0	0	NA	NA	NA	NA	NA	NA	NA	NA	NA	NA	NA	NA	NA	NA	NA	NA	NA	NA	NA	NA	NA	NA	NA	NA	NA	NA	NA	NA	NA	NA	NA
ENSG00000233419	AL121994.1	processed_pseudogene	human	0	0	0	0	0	0.196875	0	0	0.166821	0	0	0	0	0.198997	0.190834	NA	NA	NA	NA	NA	1.35433	NA	NA	0.896211	NA	NA	NA	NA	1.3971	1.29502	NA	NA	NA	NA	NA	4.08047	NA	NA	4.08047	NA	NA	NA	NA	4.08047	4.08047	NA
ENSG00000231953	AL031432.1	lncRNA	human	0	0	0	0	0	0	0	0	0	0	0	0	0	0	0	NA	NA	NA	NA	NA	NA	NA	NA	NA	NA	NA	NA	NA	NA	NA	NA	NA	NA	NA	NA	NA	NA	NA	NA	NA	NA	NA	NA	NA	NA	NA
ENSG00000117614	SYF2	protein_coding	human	409.02	468.118	344.39	424.68	432.773	348.223	403.29	469.343	275.299	442.399	373.601	326.368	424.932	347.19	341.327	0.0998528	0.0860318	-0.210196	0.0202259	-0.0398505	-0.244487	-0.0629592	-0.124627	-0.033353	0.0215154	-0.295063	-0.29333	-0.0289474	-0.200774	-0.252853	0.103464	0.101053	0.111691	0.101182	0.105625	0.141861	0.0991828	0.0995124	0.149176	0.0983278	0.107133	0.110231	0.101294	0.141524	0.140092	0.965094
ENSG00000284602	AL031432.4	lncRNA	human	32.4889	38.044	35.4141	37.1453	42.3229	37.9993	33.4276	44.4307	36.244	34.0782	37.1292	31.8008	43.0825	43.2339	38.4868	-0.061739	0.0102354	0.366568	0.135979	0.38187	0.485128	0.215457	0.37056	0.117919	0.108304	0.357702	0.445424	0.275939	0.107282	0.360135	0.359907	0.33223	0.341545	0.334859	0.327861	0.337496	0.333972	0.304942	0.320101	0.330631	0.316878	0.343439	0.308339	0.311051	0.316714	-0.171541
ENSG00000284657	AL031432.5	lncRNA	human	3.66888	6.23031	4.89948	5.48632	6.02284	5.43534	4.02657	7.17107	5.06572	4.63201	5.84847	3.59625	6.34987	6.19302	5.68582	-0.848817	0.358887	0.318836	0.275707	0.40963	0.52629	1.13944	0.06072	0.206107	1.2485	-0.0327072	1.18101	0.158272	0.123895	0.259216	1.05834	0.815808	0.880999	0.864316	0.799424	0.88403	1.01011	0.730794	0.862891	0.952658	0.804473	1.03253	0.773351	0.792899	0.857313	-0.802029
ENSG00000117616	RSRP1	protein_coding	human	372.435	586.508	447.842	421.426	585.682	440.75	226.739	586.618	329.536	366.492	445.323	270.054	420.08	437.954	297.712	-1.355	-0.134844	-0.344909	-1.08054	-0.0456496	-0.473935	0.290508	0.0890544	-0.129321	1.25603	-0.210382	1.0259	1.06666	-0.425766	0.617923	0.140224	0.123713	0.130699	0.137354	0.125034	0.138847	0.136656	0.101552	0.120703	0.115575	0.105878	0.12541	0.116093	0.11594	0.131059	-9.66307
ENSG00000272432	AL031432.3	lncRNA	human	3.31319	3.93411	2.96354	2.65097	4.10819	2.92179	2.34033	4.34839	2.30536	3.50502	3.13372	2.63235	3.02794	3.24688	1.99106	-0.0603014	0.0495241	-0.206765	-1.09906	0.258379	-0.301475	-1.01939	0.210352	-0.0997844	0.14128	-0.251739	-0.130033	1.38334	-0.554404	0.804526	1.08882	0.972169	1.13441	1.21095	0.957938	1.14568	1.27392	0.917591	1.25351	1.02755	1.08634	1.20597	1.14494	1.08237	1.35664	-0.0553825
ENSG00000261349	AL031432.2	unprocessed_pseudogene	human	0	0	0	0	0	0	0	0	0	0	0	0	0	0	0	NA	NA	NA	NA	NA	NA	NA	NA	NA	NA	NA	NA	NA	NA	NA	NA	NA	NA	NA	NA	NA	NA	NA	NA	NA	NA	NA	NA	NA	NA	NA
ENSG00000187010	RHD	protein_coding	human	0	0	0	0.185172	0	0	0.170448	0	0	0	0	0	0.185776	0	0.160598	NA	NA	NA	1.03172	NA	NA	0.789963	NA	NA	NA	NA	NA	-1.04106	NA	-0.628535	NA	NA	NA	4.08047	NA	NA	4.08047	NA	NA	NA	NA	NA	4.08047	NA	4.08047	NA
ENSG00000224183	SDHDP6	processed_pseudogene	human	0	0	0.201532	0	0	0	0	0	0.175704	0	0.211936	0.185832	0	0	0	NA	NA	1.41939	NA	NA	NA	NA	NA	-1.02734	NA	1.55757	1.17731	NA	NA	NA	NA	NA	4.08047	NA	NA	NA	NA	NA	4.08047	NA	4.08047	4.08047	NA	NA	NA	NA
ENSG00000259984	AL928711.1	unprocessed_pseudogene	human	6.33265	5.32495	3.3964	5.13923	5.34561	4.13116	6.73635	6.04328	2.99345	7.00785	3.91926	4.84915	5.80281	4.69752	4.50933	0.994173	0.243545	-0.529191	0.334083	0.325343	0.0334265	-0.6436	0.0800782	0.55575	-0.717648	-0.768522	-1.50539	0.0184175	-0.288042	-0.291828	0.833186	0.847719	1.10714	0.898836	0.838997	1.01171	0.806253	0.769483	1.18273	0.752782	1.01892	0.991942	0.81876	0.920913	0.984638	1.19322
ENSG00000183726	TMEM50A	protein_coding	human	1844.35	1972.86	1515.17	1813.23	1882.26	1548.83	1753.03	1937.82	1213.77	1897.87	1555.85	1462.01	1777.55	1512.02	1456.76	0.14402	-0.0607974	-0.236345	-0.0907872	-0.100011	-0.235841	-0.217472	-0.0369401	0.000466288	-0.169816	-0.173915	-0.36361	0.0221723	-0.133644	-0.133849	0.0645361	0.0728968	0.0700889	0.064012	0.0684457	0.0838505	0.0548193	0.066072	0.083639	0.0645424	0.0699246	0.0621307	0.058988	0.0797552	0.0785286	2.23162
ENSG00000188672	RHCE	protein_coding	human	1.30543	1.4833	1.0521	2.20172	1.87245	1.08846	1.47519	1.30138	0.32364	0.770279	0.542563	0.482194	2.03791	0.928508	1.23823	-1.33315	-1.57222	-2.04966	0.285774	-0.304986	-2.11515	1.63646	1.26052	-0.0655587	-0.137205	-0.590232	-0.708932	-0.560461	-1.8067	-2.38585	1.76572	1.71808	2.00491	1.28531	1.3835	2.01455	1.66183	1.7693	3.38331	2.22488	2.66458	2.73283	1.31797	2.07926	1.9097	-0.755021
ENSG00000238084	AL031284.1	processed_pseudogene	human	0.866731	1.39505	1.0143	1.57714	1.67276	1.23907	0.601763	1.15424	0.525655	0.371108	0.55441	0.186253	1.3555	1.03303	0.964043	-3.12733	-1.49752	-1.97012	-0.504239	-0.508235	-1.09343	2.63784	0.980212	0.901472	1.79266	-0.563983	1.17731	0.0382954	-0.592406	-0.566706	2.20435	1.82867	2.04416	1.56941	1.55026	1.82977	2.5827	2.03676	2.67543	3.39494	2.81546	4.08047	1.73521	2.01346	2.04668	-1.41871
ENSG00000204178	MACO1	protein_coding	human	599.423	676.269	525.074	631.632	661.754	530.064	630.89	744.244	464.136	672.918	592.009	524.405	693.933	583.792	557.237	0.252585	0.202026	0.074226	0.219853	0.236624	0.0381039	-0.0152414	0.0366058	-0.036534	-0.0151868	-0.126116	-0.161581	0.0479404	-0.196127	-0.170949	0.0930602	0.0925643	0.0958479	0.0899125	0.0924585	0.104518	0.0838006	0.0840733	0.102575	0.0863154	0.0896219	0.0906849	0.0834089	0.0978757	0.0980308	2.71421
ENSG00000157978	LDLRAP1	protein_coding	human	724.188	796.251	622.729	773.203	758.022	663.605	760.379	821.279	560.903	781.869	674.14	613.178	795.282	681.591	693.763	0.206879	0.0883927	-0.0304108	0.20767	0.0402061	0.0889583	0.0178769	-0.0473933	0.117926	-0.0826823	-0.117653	-0.220811	-0.136558	0.0506342	-0.108566	0.0812752	0.0814172	0.092329	0.0799237	0.0842402	0.10222	0.0751273	0.0782892	0.107847	0.0768432	0.0882717	0.0886053	0.078066	0.0994122	0.0963827	2.54541
ENSG00000225643	AL606491.1	lncRNA	human	1.07124	1.24668	1.80932	1.45357	1.4771	1.58511	0.622724	0.722046	1.4608	0.376285	1.19833	1.03475	0.966466	1.1501	1.13266	-2.20902	-2.55659	0.200717	-0.945787	-1.05139	-0.225643	1.2711	1.48105	-0.428001	-0.261152	2.76007	2.42644	-0.0708652	0.823691	0.72705	1.9914	1.91581	1.39887	1.63662	1.61634	1.56104	2.46874	2.39138	1.57661	3.16667	1.92594	1.99813	1.98648	1.86015	1.88634	-1.10928
ENSG00000117643	MAN1C1	protein_coding	human	17.1749	19.3509	18.3004	18.6949	17.304	17.5242	14.1001	14.1592	14.3603	14.4101	15.8243	14.0748	13.8318	13.1708	14.4598	-0.532419	-0.589162	-0.117142	-0.472818	-0.892475	-0.294625	0.0760773	-0.301793	-0.181188	-0.0213918	0.474364	0.432927	-0.39133	0.599124	0.183946	0.470127	0.451773	0.459032	0.47154	0.488868	0.50126	0.516861	0.528755	0.532227	0.496349	0.487583	0.505529	0.547189	0.574764	0.555529	-1.1325
ENSG00000233478	AL031280.1	lncRNA	human	0	0	0	0	0	0	0	0	0	0	0	0	0	0	0	NA	NA	NA	NA	NA	NA	NA	NA	NA	NA	NA	NA	NA	NA	NA	NA	NA	NA	NA	NA	NA	NA	NA	NA	NA	NA	NA	NA	NA	NA	NA
ENSG00000162430	SELENON	protein_coding	human	2966.39	3352.14	2927.29	3141.75	3312.74	2982.92	2892.75	3437.71	2687.22	3073.99	3035.22	2684.74	3217.27	3045.25	2890.52	0.0100111	-0.0353716	0.159791	-0.0127049	0.0238033	0.15114	-0.00550592	0.0598551	-0.0097097	-0.00907856	0.196123	0.1665	0.0677189	0.129502	0.174041	0.0620751	0.0654072	0.0627808	0.0588597	0.0675977	0.0749197	0.0507064	0.0600478	0.0707078	0.0586707	0.0594725	0.0570068	0.055937	0.0722328	0.0667806	0.161274
ENSG00000255054	AL020996.2	protein_coding	human	0	0	0	0	0	0	0	0	0	0	0	0	0	0	0	NA	NA	NA	NA	NA	NA	NA	NA	NA	NA	NA	NA	NA	NA	NA	NA	NA	NA	NA	NA	NA	NA	NA	NA	NA	NA	NA	NA	NA	NA	NA
ENSG00000228172	AL020996.1	lncRNA	human	18.4646	17.6939	16.3469	18.0523	21.7236	18.7977	12.8341	14.842	12.1293	12.141	10.4295	11.6861	15.4291	16.4116	13.3077	-0.612241	-1.30642	-0.824348	-0.95504	-0.398667	-0.387876	-0.325376	0.917131	0.433735	-0.673958	0.508209	-0.194976	0.585353	0.0134922	0.576069	0.458616	0.497602	0.500609	0.472479	0.424066	0.456055	0.542583	0.540683	0.564836	0.572619	0.631258	0.575701	0.511032	0.489937	0.543573	-1.33497
ENSG00000117640	MTFR1L	protein_coding	human	472.709	537.412	453.087	510.528	543.136	477.271	436.888	527.593	390.396	457.252	439.085	386.471	500.92	467.612	439.403	-0.194509	-0.228146	-0.121422	-0.159591	-0.0942793	-0.0317031	0.0515917	0.135069	0.08939	0.00153307	0.108238	0.0895136	0.0960908	0.0655339	0.138805	0.10264	0.0989161	0.102175	0.0972909	0.0975114	0.114747	0.0978453	0.0932955	0.11406	0.0991488	0.0994234	0.10358	0.0931398	0.109357	0.110308	-1.89505
ENSG00000127423	AUNIP	protein_coding	human	312.092	381.684	318.369	341.285	375.866	313.045	345.284	456.791	316.989	383.436	386.031	319.034	410.506	374.053	342.207	0.302454	0.465153	0.522851	0.363862	0.50532	0.426339	0.0781072	0.0403142	-0.096435	0.199246	0.0585451	0.237183	0.172638	-0.0766305	0.0732868	0.119282	0.113496	0.122117	0.115982	0.118029	0.132344	0.106421	0.101987	0.126985	0.103485	0.107509	0.113616	0.105591	0.122082	0.122182	2.53562
ENSG00000272478	AL020996.3	lncRNA	human	0	0	0	0	0	0	0	0	0	0	0	0	0	0	0	NA	NA	NA	NA	NA	NA	NA	NA	NA	NA	NA	NA	NA	NA	NA	NA	NA	NA	NA	NA	NA	NA	NA	NA	NA	NA	NA	NA	NA	NA	NA
ENSG00000236528	AL033528.3	lncRNA	human	7.06635	11.2117	10.2078	9.46404	11.7904	9.15028	5.26179	11.4584	8.0839	6.6054	9.91856	6.34957	9.67562	9.30672	7.3125	-1.55639	-0.213074	0.0887891	-0.551034	0.00752422	-0.321728	1.01992	0.220964	-0.411187	1.37177	0.30415	1.66202	0.589678	-0.328025	0.243639	0.77559	0.583426	0.603925	0.638511	0.561465	0.661428	0.843791	0.565723	0.674802	0.774272	0.604287	0.79189	0.619452	0.640598	0.724504	-2.00671
ENSG00000182749	PAQR7	protein_coding	human	182.267	211.684	205.473	187.621	193.516	200.403	158.842	189.9	190.501	179.234	204.312	176.348	166.951	181.976	176.428	-0.213849	-0.16489	0.313903	-0.331629	-0.36139	0.19271	-0.100984	-0.195278	-0.121504	0.0845581	0.479536	0.544361	0.00123156	0.556456	0.534976	0.146898	0.148982	0.140066	0.145212	0.146684	0.149829	0.150805	0.154233	0.149042	0.15309	0.147914	0.146201	0.152015	0.155126	0.155112	-1.45576
ENSG00000207302	AL033528.1	misc_RNA	human	0	0	0	0	0	0	0	0	0	0	0	0	0	0	0	NA	NA	NA	NA	NA	NA	NA	NA	NA	NA	NA	NA	NA	NA	NA	NA	NA	NA	NA	NA	NA	NA	NA	NA	NA	NA	NA	NA	NA	NA	NA
ENSG00000117632	STMN1	protein_coding	human	3226.29	3483.97	2594.69	3352.39	3284.14	2623.76	3448.48	3670.68	2180.85	3581.01	2907.02	2694.14	3520.44	2763.42	2825.79	0.342059	0.177257	-0.074998	0.272097	0.107237	-0.10667	-0.052797	-0.0685607	-0.0320046	-0.129342	-0.250951	-0.400289	-0.133673	-0.211253	-0.36749	0.0512355	0.0670686	0.0618836	0.0516397	0.0567952	0.0730644	0.0457735	0.0632209	0.0794689	0.0621115	0.0703961	0.0574308	0.0503698	0.0721407	0.0709239	6.67622
ENSG00000229786	SNRPFP2	processed_pseudogene	human	0	0	0	0	0	0	0	0	0	0	0	0	0	0	0	NA	NA	NA	NA	NA	NA	NA	NA	NA	NA	NA	NA	NA	NA	NA	NA	NA	NA	NA	NA	NA	NA	NA	NA	NA	NA	NA	NA	NA	NA	NA
ENSG00000223624	AL033528.2	processed_pseudogene	human	0	0	0	0	0	0	0	0	0	0	0	0	0	0	0	NA	NA	NA	NA	NA	NA	NA	NA	NA	NA	NA	NA	NA	NA	NA	NA	NA	NA	NA	NA	NA	NA	NA	NA	NA	NA	NA	NA	NA	NA	NA
ENSG00000283938	MIR3917	miRNA	human	0	0	0	0	0	0	0	0	0	0	0	0	0	0	0	NA	NA	NA	NA	NA	NA	NA	NA	NA	NA	NA	NA	NA	NA	NA	NA	NA	NA	NA	NA	NA	NA	NA	NA	NA	NA	NA	NA	NA	NA	NA
ENSG00000158006	PAFAH2	protein_coding	human	486.357	564.382	459.773	483.357	552.742	470.195	445.354	589.201	407.104	517.979	489.351	421.859	505.446	488.86	428.215	0.0143342	0.046361	0.0431393	-0.200561	0.0745088	0.0428367	-0.198416	0.0290121	-0.000405912	0.0674101	-0.00193816	0.0453408	0.306231	-0.029495	0.254318	0.0979616	0.0924482	0.0978678	0.0940968	0.0933006	0.104234	0.0971421	0.0898075	0.107276	0.0947347	0.0953232	0.101467	0.0924634	0.10257	0.104696	0.146325
ENSG00000207237	RNU6-110P	snRNA	human	0	0	0	0	0	0	0	0	0	0	0	0	0	0	0	NA	NA	NA	NA	NA	NA	NA	NA	NA	NA	NA	NA	NA	NA	NA	NA	NA	NA	NA	NA	NA	NA	NA	NA	NA	NA	NA	NA	NA	NA	NA
ENSG00000252190	AL592064.1	scaRNA	human	0	0	0	0	0	0	0	0	0	0	0	0	0	0	0	NA	NA	NA	NA	NA	NA	NA	NA	NA	NA	NA	NA	NA	NA	NA	NA	NA	NA	NA	NA	NA	NA	NA	NA	NA	NA	NA	NA	NA	NA	NA
ENSG00000252691	AL592064.2	scaRNA	human	0	0	0	0	0	0	0	0	0	0	0	0	0	0	0	NA	NA	NA	NA	NA	NA	NA	NA	NA	NA	NA	NA	NA	NA	NA	NA	NA	NA	NA	NA	NA	NA	NA	NA	NA	NA	NA	NA	NA	NA	NA
ENSG00000158008	EXTL1	protein_coding	human	1.42054	2.93855	1.18448	2.81979	1.63937	1.92218	1.92904	2.25629	0.963875	1.9871	1.69389	0.501525	2.17111	1.34292	2.37519	-1.52329	0.488188	-2.23283	0.594808	-1.27754	-0.116045	2.13899	-1.77228	2.11467	2.0582	-2.73335	-0.702772	-1.84144	1.16912	-0.696388	1.69885	1.14924	1.91421	1.13524	1.54251	1.42175	1.53997	1.4244	2.14974	1.55319	1.75938	2.70055	1.40651	1.76206	1.30057	-0.896659
ENSG00000158014	SLC30A2	protein_coding	human	0.399197	1.07264	0.201532	0.185172	0.325465	0	0.556867	1.42731	0.175704	1.40362	1.1278	0.524306	0.505011	0.281761	0.160598	2.2309	3.42581	1.41939	1.03172	1.81076	NA	-1.16234	-1.66025	-1.02734	1.26254	-1.99228	-0.780951	0.805562	-1.4084	-0.628535	3.38303	2.43015	4.08047	4.08047	3.63764	NA	2.76439	3.9067	4.08047	3.89434	2.25939	2.83337	2.88931	3.87086	4.08047	0.659439
ENSG00000284309	AL391650.2	lncRNA	human	0	0	0.202873	0	0	0	0	0	0.177629	0	0.21295	0.186253	0	0	0	NA	NA	1.41939	NA	NA	NA	NA	NA	-1.02734	NA	1.55757	1.17731	NA	NA	NA	NA	NA	4.08047	NA	NA	NA	NA	NA	4.08047	NA	4.08047	4.08047	NA	NA	NA	NA
ENSG00000158022	TRIM63	protein_coding	human	0	0	0	0	0	0.330227	0	0	0.282557	0	0	0	0	0.334732	0.323165	NA	NA	NA	NA	NA	2.08048	NA	NA	1.62401	NA	NA	NA	NA	2.12513	2.02383	NA	NA	NA	NA	NA	3.72048	NA	NA	3.82153	NA	NA	NA	NA	3.61864	3.71779	NA
ENSG00000175087	PDIK1L	protein_coding	human	347.292	389.8	305.433	357.05	383.185	294.74	363.202	436.171	264.322	394.396	348.485	310.083	399.505	331.431	308.657	0.305579	0.251263	0.141887	0.203306	0.286556	-0.0260911	-0.085853	0.034506	-0.166824	-0.0175173	-0.107167	-0.146509	0.114527	-0.309584	-0.218056	0.119221	0.118134	0.135618	0.120095	0.114688	0.146945	0.106488	0.101369	0.150288	0.104964	0.121843	0.123001	0.103632	0.129981	0.1366	2.56312
ENSG00000197245	FAM110D	protein_coding	human	2.19968	1.82563	1.95547	2.02234	2.27526	2.10311	1.88658	1.72744	1.73501	1.69915	1.48905	1.81651	1.93381	2.02125	1.79796	0.0422711	-1.06945	-0.072514	-0.415541	-0.197658	0.0925498	-0.439008	0.886394	0.163507	-1.07589	0.99468	-0.0994512	0.254286	0.279265	0.515779	1.28046	1.46925	1.39672	1.33577	1.35627	1.33246	1.36397	1.62485	1.4834	1.49164	1.65721	1.43868	1.46679	1.46081	1.43303	0.0330123
ENSG00000282872	C1orf232	protein_coding	human	0	0	0	0	0	0	0	0	0	0	0	0	0	0	0	NA	NA	NA	NA	NA	NA	NA	NA	NA	NA	NA	NA	NA	NA	NA	NA	NA	NA	NA	NA	NA	NA	NA	NA	NA	NA	NA	NA	NA	NA	NA
ENSG00000236782	AL391650.1	protein_coding	human	2.35185	2.01757	0.96992	2.09288	1.93995	1.36926	2.18716	1.67069	0.322484	2.12686	0.707257	1.11679	1.76615	1.06965	1.22484	0.313647	-0.596631	-3.17973	-0.16083	-0.534626	-1.40245	-0.458663	0.0577724	1.78241	-0.883309	-2.62374	-3.4895	-0.342058	-0.85918	-1.22394	1.26658	1.42572	2.10667	1.38352	1.37102	1.76295	1.34064	1.52907	3.34019	1.37335	2.48482	2.00321	1.47871	1.88401	1.9014	0.247633
ENSG00000142684	ZNF593	protein_coding	human	360.076	391.669	327.223	390.281	384.128	319.881	403.839	435.936	302.783	406.678	370.466	338.861	431	355.248	359.731	0.376861	0.22847	0.30066	0.41443	0.268032	0.183144	0.0542075	0.0409687	-0.117798	-0.113698	0.0734789	-0.0595831	-0.11527	-0.0828331	-0.220227	0.109873	0.112203	0.118008	0.107747	0.114169	0.128337	0.0991194	0.107163	0.129169	0.103504	0.112274	0.110686	0.104189	0.124647	0.120219	3.42997
ENSG00000142675	CNKSR1	protein_coding	human	11.2721	16.5531	11.4375	12.2721	17.7722	14.2964	9.58956	20.3476	11.5734	13.3714	13.412	9.00122	15.7795	17.3851	12.5215	-0.451191	0.345558	-0.18984	-0.384457	0.543834	0.386341	0.0846483	0.189023	0.570233	0.828243	-0.523118	0.278966	0.961622	-0.157673	0.776256	0.588407	0.524519	0.608626	0.567397	0.467752	0.576702	0.626701	0.470111	0.651145	0.574767	0.60296	0.673291	0.505564	0.518693	0.616342	-0.766801
ENSG00000188782	CATSPER4	protein_coding	human	0	0	0	0	0	0	0	0	0	0	0	0	0	0	0	NA	NA	NA	NA	NA	NA	NA	NA	NA	NA	NA	NA	NA	NA	NA	NA	NA	NA	NA	NA	NA	NA	NA	NA	NA	NA	NA	NA	NA	NA	NA
ENSG00000236155	ZPLD2P	transcribed_unprocessed_pseudogene	human	0	0	0	0	0	0	0	0	0	0	0	0	0	0	0	NA	NA	NA	NA	NA	NA	NA	NA	NA	NA	NA	NA	NA	NA	NA	NA	NA	NA	NA	NA	NA	NA	NA	NA	NA	NA	NA	NA	NA	NA	NA
ENSG00000278572	AL355877.2	unprocessed_pseudogene	human	0.136856	0.157235	0.12825	0.146382	0.152193	0.131509	0	0	0	0	0	0	0	0	0	-0.703018	-1.09864	-0.50416	-0.89183	-1.00226	-0.569223	NA	NA	NA	NA	NA	NA	NA	NA	NA	4.08047	4.08047	4.08047	4.08047	4.08047	4.08047	NA	NA	NA	NA	NA	NA	NA	NA	NA	-0.172288
ENSG00000130695	CEP85	protein_coding	human	954.276	1233.73	970.914	1007.02	1183.51	978.51	920.517	1380.03	900.373	1125.45	1133.09	884.581	1140.23	1094.84	938.605	-0.0107161	0.316021	0.222303	-0.0443855	0.290681	0.183674	-0.0165875	-0.0245454	-0.039381	0.362714	-0.092442	0.249687	0.365838	-0.104728	0.238496	0.0771152	0.0740378	0.082152	0.0743447	0.0770223	0.0895272	0.0681212	0.0672326	0.0887433	0.0677471	0.0737231	0.0768018	0.0684164	0.0830225	0.0809415	-0.138962
ENSG00000270733	AL355877.1	processed_pseudogene	human	0.173599	0	0	0	0	0	0.168875	0	0	0.180183	0	0.14777	0	0	0	1.22054	NA	NA	NA	NA	NA	-1.13359	NA	NA	-1.32153	NA	-0.746246	NA	NA	NA	4.08047	NA	NA	NA	NA	NA	4.08047	NA	NA	4.08047	NA	4.08047	NA	NA	NA	0.299116
ENSG00000142669	SH3BGRL3	protein_coding	human	1296.85	1432.41	1095.14	1413.62	1395.64	1108.91	1458.05	1599.77	977.633	1480.47	1261.26	1140.33	1567.73	1242.13	1256.67	0.36739	0.265329	0.0933445	0.419865	0.283535	0.0676822	0.0688077	0.0198367	-0.0260289	-0.0666182	-0.17121	-0.258092	-0.104403	-0.213952	-0.341337	0.0937841	0.0928423	0.0959589	0.0888982	0.100776	0.105909	0.0642734	0.0723066	0.0864486	0.0667446	0.0681043	0.0723971	0.0721864	0.0899265	0.0798127	3.91741
ENSG00000158062	UBXN11	protein_coding	human	446.484	481.771	352.999	503.214	489.434	352.923	511.08	541.806	285.749	492.768	393.273	365.2	558.571	400.253	412.821	0.324436	0.169034	-0.145851	0.462244	0.287024	-0.216724	0.154462	0.118306	-0.0720394	-0.11755	-0.314177	-0.453943	-0.143702	-0.502488	-0.668942	0.107395	0.117362	0.120437	0.114036	0.111793	0.133404	0.1003	0.109195	0.132196	0.104177	0.117219	0.107153	0.106057	0.12403	0.126475	3.02095
ENSG00000169442	CD52	protein_coding	human	0	0	0	0	0.147916	0	0	0.155891	0	0	0	0	0.145929	0.128999	0	NA	NA	NA	NA	0.921293	NA	NA	1.0595	NA	NA	NA	NA	0.88249	-0.526457	NA	NA	NA	NA	NA	4.08047	NA	NA	4.08047	NA	NA	NA	NA	4.08047	4.08047	NA	NA
ENSG00000176092	CRYBG2	protein_coding	human	33.6165	39.9885	31.6664	34.5886	36.0161	39.8512	28.2727	35.1459	31.3214	32.8566	30.9559	25.925	29.9999	35.7901	34.3905	-0.297964	-0.18023	-0.278552	-0.413529	-0.411706	0.319984	-0.0976203	-0.230678	0.59721	0.152055	-0.095406	0.0366445	0.0307276	0.733893	0.742755	0.348814	0.330686	0.360576	0.354483	0.331765	0.323454	0.373246	0.336363	0.350832	0.347027	0.36379	0.382253	0.361853	0.326079	0.349037	-0.854219
ENSG00000225854	AL451139.1	processed_pseudogene	human	0	0	0	0	0	0	0	0	0	0	0	0	0	0	0	NA	NA	NA	NA	NA	NA	NA	NA	NA	NA	NA	NA	NA	NA	NA	NA	NA	NA	NA	NA	NA	NA	NA	NA	NA	NA	NA	NA	NA	NA	NA
ENSG00000176083	ZNF683	protein_coding	human	0	0	0	0	0	0	0	0	0	0	0	0	0	0	0	NA	NA	NA	NA	NA	NA	NA	NA	NA	NA	NA	NA	NA	NA	NA	NA	NA	NA	NA	NA	NA	NA	NA	NA	NA	NA	NA	NA	NA	NA	NA
ENSG00000131914	LIN28A	protein_coding	human	0.173599	0.721199	0.561903	0.925861	0.443749	0.903721	1.02111	1.20018	1.2612	0.847328	1.2052	0.663976	1.36666	1.30312	1.68618	1.22054	2.86062	2.85624	3.3566	2.27849	3.51288	2.14461	-0.517228	0.653386	1.65929	0.0435251	1.65524	-1.06454	1.20325	0.192993	4.08047	2.37974	2.74013	2.51351	3.21226	2.21719	2.27048	1.86482	1.70954	2.13489	1.76828	2.43355	3.87584	1.79617	1.66027	0.299116
ENSG00000117682	DHDDS	protein_coding	human	845.237	866.747	698.264	885.203	866.981	727.893	937.183	954.469	644.697	924.937	769.098	746.676	966.035	797.781	811.7	0.439521	0.142909	0.112431	0.391015	0.231205	0.163888	-0.0316253	0.0891554	0.0507644	-0.260811	-0.0292877	-0.310413	-0.128712	-0.0652751	-0.216951	0.0769718	0.0793448	0.0830446	0.0760878	0.0825627	0.0993396	0.0687027	0.075853	0.0982899	0.0722361	0.0784093	0.0766848	0.0742062	0.0969885	0.0925141	5.71016
ENSG00000223583	AL513365.1	processed_pseudogene	human	1.22462	0.551092	0.286742	0.512467	0.63583	0.670086	1.06307	0.515115	0.322484	1.13676	0.17073	0.780049	0.477633	0.640393	0.529788	1.58914	-0.957868	-1.41253	-0.835511	-0.143214	0.370608	-2.40064	0.800671	1.78241	-2.54215	-0.482655	-2.97819	0.709389	0.51845	1.21951	1.80836	2.67941	3.53436	2.73772	2.51089	2.39138	1.97868	2.88076	3.34019	1.92586	4.06596	2.22847	2.94544	2.51672	2.72354	0.878777
ENSG00000225891	DHDDS-AS1	lncRNA	human	13.228	16.0882	13.6568	16.5606	17.7698	16.0608	9.52093	12.8127	10.0767	8.61617	9.3867	7.51209	13.5231	13.3177	12.3436	-1.34155	-1.1401	-0.891669	-0.663927	-0.558168	-0.384376	0.69501	0.576555	0.508023	0.258361	0.226333	0.466075	0.138057	0.174598	0.290176	0.563917	0.505344	0.561669	0.478733	0.467111	0.48744	0.631856	0.562097	0.630747	0.667195	0.666465	0.737349	0.531553	0.536618	0.549377	-2.37899
ENSG00000198830	HMGN2	protein_coding	human	2034.94	2338.11	1664.47	2228.2	2205.04	1657.6	2316.07	2641.19	1432.2	2427.07	2018.71	1756.25	2506.11	1897.56	1917.88	0.394482	0.393083	0.0329689	0.457643	0.328866	-0.0415029	0.0797949	-0.0614559	-0.0749153	0.0333582	-0.358431	-0.345218	-0.0973515	-0.368348	-0.488347	0.0683882	0.0793075	0.0764768	0.0642354	0.070622	0.0937155	0.0500111	0.0655572	0.0920161	0.0667462	0.0741747	0.0641335	0.0506469	0.0834908	0.0812639	5.76828
ENSG00000224129	DPPA2P2	processed_pseudogene	human	0	0	0	0	0	0	0	0	0	0	0	0	0	0	0	NA	NA	NA	NA	NA	NA	NA	NA	NA	NA	NA	NA	NA	NA	NA	NA	NA	NA	NA	NA	NA	NA	NA	NA	NA	NA	NA	NA	NA	NA	NA
ENSG00000117676	RPS6KA1	protein_coding	human	832.402	945.05	804.305	893.582	918.357	849.953	821.816	955.997	749.059	865.46	836.402	736.686	902.575	856.683	832.923	0.00653402	-0.0266385	0.0975331	0.0205217	-0.0163085	0.188199	0.0305553	0.0111008	0.0896965	0.00250581	0.125439	0.107723	-0.00615993	0.206646	0.177363	0.0776629	0.080389	0.0823152	0.0771796	0.0871361	0.0948826	0.0754804	0.0848916	0.0969431	0.0778968	0.0832439	0.0815304	0.083757	0.100055	0.0926327	0.0841331
ENSG00000238705	MIR1976	miRNA	human	0	0	0	0	0	0	0	0	0	0	0	0	0	0	0	NA	NA	NA	NA	NA	NA	NA	NA	NA	NA	NA	NA	NA	NA	NA	NA	NA	NA	NA	NA	NA	NA	NA	NA	NA	NA	NA	NA	NA	NA	NA
ENSG00000243905	RN7SL679P	misc_RNA	human	0	0	0	0	0	0	0	0	0	0	0	0	0	0	0	NA	NA	NA	NA	NA	NA	NA	NA	NA	NA	NA	NA	NA	NA	NA	NA	NA	NA	NA	NA	NA	NA	NA	NA	NA	NA	NA	NA	NA	NA	NA
ENSG00000252802	AL627313.2	misc_RNA	human	0	0	0	0	0	0	0	0	0	0	0	0	0	0	0	NA	NA	NA	NA	NA	NA	NA	NA	NA	NA	NA	NA	NA	NA	NA	NA	NA	NA	NA	NA	NA	NA	NA	NA	NA	NA	NA	NA	NA	NA	NA
ENSG00000252429	RNU7-29P	snRNA	human	0	0	0	0	0	0	0	0	0	0	0	0	0	0	0	NA	NA	NA	NA	NA	NA	NA	NA	NA	NA	NA	NA	NA	NA	NA	NA	NA	NA	NA	NA	NA	NA	NA	NA	NA	NA	NA	NA	NA	NA	NA
ENSG00000229247	AL627313.1	processed_pseudogene	human	0	0	0	0	0	0	0	0	0	0	0	0	0	0	0	NA	NA	NA	NA	NA	NA	NA	NA	NA	NA	NA	NA	NA	NA	NA	NA	NA	NA	NA	NA	NA	NA	NA	NA	NA	NA	NA	NA	NA	NA	NA
ENSG00000238316	AL627082.2	snoRNA	human	0	0	0	0	0	0	0	0	0	0	0	0	0	0	0	NA	NA	NA	NA	NA	NA	NA	NA	NA	NA	NA	NA	NA	NA	NA	NA	NA	NA	NA	NA	NA	NA	NA	NA	NA	NA	NA	NA	NA	NA	NA
ENSG00000235069	AL627082.1	processed_pseudogene	human	0	0	0	0	0	0	0	0	0	0	0	0	0	0	0	NA	NA	NA	NA	NA	NA	NA	NA	NA	NA	NA	NA	NA	NA	NA	NA	NA	NA	NA	NA	NA	NA	NA	NA	NA	NA	NA	NA	NA	NA	NA
ENSG00000260063	AL512408.1	lncRNA	human	23.9906	21.275	17.1581	31.1798	19.1074	20.2257	33.8075	19.8468	16.9502	24.9033	17.8186	20.1613	29.8658	19.0066	29.4064	0.645749	-0.0357915	-0.0620784	1.08425	-0.2592	0.327632	0.45521	-0.223578	0.390282	-0.647743	-0.0251021	-0.691	-1.31448	0.590908	-0.747043	0.393922	0.434071	0.474392	0.355208	0.450613	0.436834	0.323832	0.453678	0.472715	0.389122	0.475471	0.43361	0.371311	0.453931	0.364561	1.63928
ENSG00000117713	ARID1A	protein_coding	human	4990.43	5754.94	4829.33	5356.47	5384.61	4842.7	5581.49	6476.4	4827.82	5973.49	5754.8	4995.13	6016.84	5422.54	5369.08	0.39532	0.406032	0.480445	0.409164	0.3193	0.432215	0.0315046	-0.0855968	-0.0493899	0.0468983	0.0757259	0.102104	-0.0589139	0.114985	0.0330397	0.0612345	0.0600605	0.0580718	0.059978	0.0640724	0.0801742	0.0513369	0.0488058	0.0706851	0.0512871	0.0461599	0.0501176	0.0535949	0.0735662	0.0726046	6.45584
ENSG00000060642	PIGV	protein_coding	human	302.175	330.403	285.415	327.241	322.837	287.203	276.206	293.744	227.439	275.97	261.163	239.813	292.811	255.819	260.583	-0.232929	-0.381115	-0.204052	-0.18843	-0.358924	-0.253461	0.0611489	0.0236892	-0.0499801	-0.111727	0.179076	0.0457665	-0.13874	0.107688	-0.0542591	0.120794	0.124516	0.128185	0.115751	0.123185	0.131528	0.115737	0.127859	0.139341	0.124017	0.133001	0.129635	0.119557	0.135116	0.128236	-1.92831
ENSG00000241188	RN7SL165P	misc_RNA	human	0.1497	0.386941	0.139937	0.15967	0.166899	0.142694	0	0.217613	0	0.198177	0.183172	0	0	0	0	-0.703018	-0.0369057	-0.50416	-0.89183	-1.00226	-0.569223	NA	-0.980163	NA	0.720002	-0.482655	NA	NA	NA	NA	4.08047	3.24566	4.08047	4.08047	4.08047	4.08047	NA	4.06602	NA	4.06582	4.06596	NA	NA	NA	NA	-0.172288
ENSG00000287810	AL034380.2	unprocessed_pseudogene	human	0	0	0	0	0	0	0	0	0	0	0	0	0	0	0	NA	NA	NA	NA	NA	NA	NA	NA	NA	NA	NA	NA	NA	NA	NA	NA	NA	NA	NA	NA	NA	NA	NA	NA	NA	NA	NA	NA	NA	NA	NA
ENSG00000204160	ZDHHC18	protein_coding	human	1252.66	1549.29	1037.03	1321.35	1491.7	1032.46	1538.9	2069.59	1035.7	1767.05	1509.88	1231.95	1801.57	1455.29	1300.26	0.786728	0.951476	0.496893	0.759399	0.940503	0.430885	-0.0101868	-0.00985545	-0.0666081	0.200279	-0.453397	-0.273199	0.212039	-0.507373	-0.31803	0.0675918	0.0686481	0.0766536	0.0648512	0.0724068	0.0821857	0.0568645	0.0651308	0.0847948	0.0619696	0.0707337	0.0700823	0.062628	0.0795138	0.0738261	11.6394
ENSG00000175793	SFN	protein_coding	human	3654.62	4625.02	2532.18	3912	4254.54	2527.33	5001.76	6588.48	2560.52	5744.49	4437.09	3541.71	5724.98	4123.2	3806.26	1.20326	1.39966	0.532211	1.20872	1.29813	0.473652	0.0227276	-0.100704	-0.0590733	0.23197	-0.866111	-0.654422	0.12022	-0.822003	-0.724565	0.0603891	0.0686231	0.0692963	0.0562377	0.0756654	0.0741302	0.0415625	0.0674832	0.0727878	0.0568122	0.0646883	0.0575237	0.0597738	0.0763563	0.0596671	19.9251
ENSG00000142751	GPN2	protein_coding	human	624.222	755.008	592.956	676.557	713.783	589.632	659.814	835.335	543.349	732.111	693.704	575.819	749.747	653.083	619.225	0.183754	0.320142	0.224088	0.224164	0.258407	0.149981	0.0572513	-0.0604546	-0.0750686	0.171897	-0.0947678	0.057033	0.0651266	-0.106685	-0.0639596	0.087073	0.0849146	0.0904587	0.0826832	0.0855818	0.105131	0.079565	0.079261	0.10427	0.0811791	0.0852031	0.0879102	0.0782646	0.099648	0.097457	2.11034
ENSG00000226698	AL034380.1	lncRNA	human	0	0	0	0	0.147916	0	0	0.155891	0	0	0	0	0.145929	0.128999	0	NA	NA	NA	NA	0.921293	NA	NA	1.0595	NA	NA	NA	NA	0.88249	-0.526457	NA	NA	NA	NA	NA	4.08047	NA	NA	4.08047	NA	NA	NA	NA	4.08047	4.08047	NA	NA
ENSG00000198746	GPATCH3	protein_coding	human	211.682	260.985	213.918	231.598	246.651	208.695	214.733	279.975	193.766	241.057	241.89	197.428	248.728	223.413	209.928	0.0332502	0.22846	0.240255	0.0960616	0.158707	0.11502	0.0792751	-0.0691834	-0.126164	0.23026	0.0131243	0.224047	0.0936097	-0.0414579	0.0293315	0.146251	0.128391	0.148197	0.135907	0.136637	0.146507	0.143629	0.12722	0.156543	0.135643	0.139058	0.156831	0.135139	0.145232	0.145223	0.227351
ENSG00000090273	NUDC	protein_coding	human	2328.84	2551.43	1976.34	2501.26	2389.5	1995.86	2571.96	2715	1757.72	2626.41	2245.32	2046.11	2649.62	2121.72	2217.2	0.350923	0.226161	0.0896666	0.36669	0.138406	0.0556917	0.0330097	-0.0856798	-0.0344408	-0.0893435	-0.134903	-0.244576	-0.197031	-0.0805424	-0.300269	0.0706577	0.073101	0.0737788	0.0674481	0.074449	0.0897406	0.054393	0.0586141	0.0837595	0.0590896	0.062312	0.0611584	0.0564053	0.0806156	0.0782969	4.96652
ENSG00000131910	NR0B2	protein_coding	human	0.2994	0.344826	0.279873	0.874857	0.663901	0.285387	0.511343	0.348541	0	0	0	0	0.883724	0.288374	0.481794	-1.58516	-1.98473	-1.38523	0.760964	-0.0278755	-1.44701	2.3732	1.9682	NA	NA	NA	NA	-0.745759	-1.43437	-2.21601	3.78133	3.6193	3.88909	2.39898	2.47506	3.94076	2.9992	3.26819	NA	NA	NA	NA	2.23079	3.52013	3.17774	-0.419206
ENSG00000175707	KDF1	protein_coding	human	0	0	0.403065	0	0	0.423011	0	0	0.713818	0	0.423873	0.371665	0	0.43006	0.415215	NA	NA	2.3568	NA	NA	2.37688	NA	NA	0.0110671	NA	2.49686	2.11895	NA	2.42144	2.32364	NA	NA	3.3748	NA	NA	3.38103	NA	NA	2.5484	NA	3.2833	3.41231	NA	3.28789	3.37483	NA
ENSG00000172746	RPL12P13	unprocessed_pseudogene	human	0	0	0	0	0	0	0	0	0	0	0	0	0	0	0	NA	NA	NA	NA	NA	NA	NA	NA	NA	NA	NA	NA	NA	NA	NA	NA	NA	NA	NA	NA	NA	NA	NA	NA	NA	NA	NA	NA	NA	NA	NA
ENSG00000224064	AL356390.1	processed_pseudogene	human	0	0	0	0	0	0	0	0	0	0	0	0	0	0	0	NA	NA	NA	NA	NA	NA	NA	NA	NA	NA	NA	NA	NA	NA	NA	NA	NA	NA	NA	NA	NA	NA	NA	NA	NA	NA	NA	NA	NA	NA	NA
ENSG00000225294	OSTCP2	processed_pseudogene	human	0.199599	0.41437	0.202873	0.325516	0	0	0.494091	0.420947	0.177629	0.590096	0.566852	0.35549	0.32724	0	0.282801	1.22054	2.043	1.41939	1.87838	NA	NA	0.68284	-2.07793	-1.02734	0.8171	-0.586936	0.215541	-1.88899	NA	-1.4746	4.08047	3.12702	4.08047	3.38925	NA	NA	2.70179	3.0634	4.08047	2.56115	2.63006	3.25443	3.32649	NA	3.59222	0.299116
ENSG00000253368	TRNP1	protein_coding	human	4822.88	4849.91	3540.74	5046.6	4823.48	3641.11	5787.44	5748.2	3224.9	5664.54	4286.08	4240.43	5877.56	4364.54	4549.8	0.722132	0.400393	0.110367	0.675544	0.468696	0.127162	-0.0296082	0.0694543	0.0162513	-0.286227	-0.28857	-0.595002	-0.175571	-0.339468	-0.537714	0.0577574	0.0621051	0.0635714	0.0554832	0.0703365	0.0721928	0.0400288	0.0591727	0.0669706	0.0482629	0.0548238	0.0510377	0.0554804	0.0719593	0.0589034	12.5028
ENSG00000158246	TENT5B	protein_coding	human	23.2598	31.4265	21.437	26.2611	29.907	20.0164	30.6194	44.0007	22.2379	35.7543	33.0496	25.2785	37.8741	30.2601	26.8964	0.851192	1.17807	0.81351	0.969763	1.16124	0.614292	0.134344	-0.00905267	-0.199297	0.358646	-0.362272	-0.0217209	0.224093	-0.54355	-0.343688	0.406396	0.381997	0.421218	0.389982	0.367637	0.446274	0.347238	0.313967	0.411977	0.340951	0.359098	0.379868	0.318255	0.365156	0.386969	2.09449
ENSG00000090020	SLC9A1	protein_coding	human	862.337	950.383	894.536	937.226	944.527	916.954	780.006	856.49	792.485	782.292	824.278	747.994	849.228	837.577	830.795	-0.273959	-0.401629	0.0365505	-0.21838	-0.320698	0.0431806	0.0724037	0.0813141	0.0056967	-0.091241	0.439137	0.32714	-0.0711441	0.366212	0.271694	0.07752	0.0833642	0.0787299	0.0753888	0.0789676	0.0930381	0.0738666	0.0811718	0.0931683	0.0811846	0.0830921	0.077929	0.0751162	0.0919829	0.0904286	-3.53404
ENSG00000229985	AL590640.2	processed_pseudogene	human	0	0	0	0	0	0	0	0	0	0	0	0	0	0	0	NA	NA	NA	NA	NA	NA	NA	NA	NA	NA	NA	NA	NA	NA	NA	NA	NA	NA	NA	NA	NA	NA	NA	NA	NA	NA	NA	NA	NA	NA	NA
ENSG00000214973	CHCHD3P3	processed_pseudogene	human	3.02056	2.53007	1.6189	2.72111	2.62417	1.19267	3.75561	3.30611	1.01284	3.65197	2.15952	2.57445	3.44161	1.8135	1.91145	1.28651	0.538201	-0.0468278	0.943746	0.748595	-1.18076	-0.323103	0.229904	-1.14619	-0.741347	-0.60122	-1.33239	-0.168117	-1.93266	-2.11467	1.13869	1.24808	1.57063	1.21755	1.19424	1.8552	0.982147	1.0599	2.01318	0.999618	1.38435	1.26894	1.03568	1.58175	1.6025	1.12981
ENSG00000225159	NPM1P39	processed_pseudogene	human	10.8064	11.3653	11.6298	12.9691	12.2557	8.94118	12.8584	12.951	9.74391	11.3908	12.2611	11.4691	14.4425	10.2067	10.8383	0.259907	0.0328823	0.602453	0.551676	0.308816	-0.142979	0.307816	0.275843	-0.745261	-0.190672	0.572279	0.360144	-0.211065	-0.449141	-0.682298	0.584221	0.573288	0.608393	0.537233	0.548676	0.658144	0.52985	0.535811	0.667758	0.560885	0.592186	0.605816	0.503779	0.615753	0.60407	0.444878
ENSG00000225990	SNRPEP7	processed_pseudogene	human	0	0	0	0	0	0	0	0	0	0	0	0	0	0	0	NA	NA	NA	NA	NA	NA	NA	NA	NA	NA	NA	NA	NA	NA	NA	NA	NA	NA	NA	NA	NA	NA	NA	NA	NA	NA	NA	NA	NA	NA	NA
ENSG00000224311	AL590640.1	lncRNA	human	0	0	0	0	0	0	0	0	0	0	0	0	0	0	0	NA	NA	NA	NA	NA	NA	NA	NA	NA	NA	NA	NA	NA	NA	NA	NA	NA	NA	NA	NA	NA	NA	NA	NA	NA	NA	NA	NA	NA	NA	NA
ENSG00000142784	WDTC1	protein_coding	human	848.222	974.45	823.996	890.708	952.441	864.467	688.101	847.23	656.669	752.22	735.476	640.437	771.278	756.285	705.5	-0.452731	-0.447284	-0.3285	-0.511878	-0.418388	-0.244736	-0.0424021	0.0294785	0.0820276	0.041641	0.120353	0.140784	0.124695	0.175374	0.276383	0.0791783	0.0827669	0.0863119	0.0817314	0.0794922	0.100107	0.0814147	0.0797834	0.105569	0.0814735	0.0890721	0.0867639	0.0811336	0.09794	0.101596	-5.71787
ENSG00000252098	AL590640.3	misc_RNA	human	0	0	0	0	0	0	0	0	0	0	0	0	0	0	0	NA	NA	NA	NA	NA	NA	NA	NA	NA	NA	NA	NA	NA	NA	NA	NA	NA	NA	NA	NA	NA	NA	NA	NA	NA	NA	NA	NA	NA	NA	NA
ENSG00000243659	FO393419.3	processed_pseudogene	human	0.914479	1.94482	0.87505	1.50664	0.973904	1.33025	0.82729	1.26651	0.686051	1.19111	1.12118	0.311222	0.863595	0.758056	1.22562	-1.93693	0.279006	-1.73805	-0.188923	-2.23719	-0.255461	1.7787	-2.54262	1.50508	2.28324	-2.04741	0.21554	-2.03065	2.00505	-0.0552308	2.08544	1.49654	2.11134	1.58476	2.04447	1.70705	2.241	2.05457	2.42516	2.05739	2.11724	3.41029	2.23664	2.37718	1.84743	-0.928784
ENSG00000186501	TMEM222	protein_coding	human	678.14	778.644	623.658	719.215	756.702	613.671	673.28	811.131	525.381	725.956	667.653	581.536	748.236	637.436	605.363	0.0575866	0.0573427	0.00972963	0.0402247	0.0677931	-0.10351	-0.000185975	0.0116724	-0.114318	0.0356152	-0.0465166	-0.0311741	0.0588954	-0.170347	-0.13374	0.085077	0.0833153	0.0932104	0.0833353	0.0865586	0.115473	0.0796458	0.0805724	0.11891	0.0796121	0.0883264	0.0909411	0.081793	0.11304	0.110726	0.676876
ENSG00000206888	RNU6-48P	snRNA	human	1.00118	0.663906	0.488621	0.608017	0.610758	0.901877	1.26927	0.996299	0.969764	1.36573	0.810093	1.06575	0.914022	1.17927	1.1517	2.42477	1.39179	1.2711	1.43974	1.36649	2.30057	-0.949664	0.00825626	1.00616	-1.03931	-0.0962272	-1.11989	-0.049318	0.918286	0.845928	2.14464	2.37225	2.95349	2.73122	2.51956	2.1589	1.85797	1.90484	2.01825	1.66553	2.17547	2.02735	2.14229	1.77694	1.89953	1.13062
ENSG00000241547	ACTG1P20	processed_pseudogene	human	11.2093	10.0739	8.15565	13.2524	11.7731	11.5883	13.5073	11.1233	8.97419	10.6091	7.509	8.61184	14.2498	12.4659	13.6655	0.351096	-0.303914	-0.388772	0.596561	0.202699	0.536092	0.262459	0.503102	0.926791	-0.616023	-0.0737099	-0.724448	-0.362299	0.33508	-0.0509536	0.572419	0.625588	0.682864	0.529816	0.554179	0.572165	0.512548	0.590237	0.653834	0.597363	0.723033	0.661805	0.501278	0.540795	0.520712	0.613354
ENSG00000142765	SYTL1	protein_coding	human	12.302	15.4664	13.8638	13.6118	14.5382	13.5163	7.37038	10.5366	9.30985	8.66574	10.563	8.2122	8.99576	9.36952	8.69183	-1.29279	-0.842383	-0.536454	-1.11677	-1.00706	-0.690451	0.19046	-0.158458	-0.156573	0.473736	0.315984	0.775934	0.139797	0.321087	0.437042	0.604077	0.531927	0.550866	0.582051	0.544446	0.57832	0.729129	0.611244	0.645974	0.666098	0.606163	0.683669	0.668648	0.654667	0.6987	-2.1401
ENSG00000142733	MAP3K6	protein_coding	human	474.959	496.691	396.969	538.867	492.108	414.502	500.196	474.42	317.018	459.374	380.464	367.329	517.838	394.238	435.961	0.0342547	-0.241253	-0.305009	0.203327	-0.173216	-0.24005	0.185921	0.0693227	0.0647082	-0.239863	-0.062199	-0.322565	-0.345373	-0.0648006	-0.432938	0.104458	0.0995256	0.108154	0.094942	0.101301	0.116325	0.0965103	0.0991911	0.121614	0.101309	0.106227	0.110936	0.0948132	0.115742	0.109407	0.327928
ENSG00000142748	FCN3	protein_coding	human	0	0	0.180185	0	0	0.165113	0	0	0.298098	0	0.18866	0.165187	0	0.167366	0.161583	NA	NA	1.41939	NA	NA	1.35433	NA	NA	-0.0655592	NA	1.55757	1.17731	NA	1.3971	1.29502	NA	NA	4.08047	NA	NA	4.08047	NA	NA	3.48432	NA	4.08047	4.08047	NA	4.08047	4.08047	NA
ENSG00000174950	CD164L2	protein_coding	human	0	0	0	0	0.162733	0.196875	0	0.169619	0.166821	0	0	0	0.159618	0.339878	0.190834	NA	NA	NA	NA	0.921293	1.35433	NA	1.0595	0.896211	NA	NA	NA	0.88249	0.435331	1.29502	NA	NA	NA	NA	4.08047	4.08047	NA	4.08047	4.08047	NA	NA	NA	4.08047	3.36081	4.08047	NA
ENSG00000231207	FO393419.1	processed_pseudogene	human	0	0	0	0	0	0	0	0	0	0	0	0	0	0	0	NA	NA	NA	NA	NA	NA	NA	NA	NA	NA	NA	NA	NA	NA	NA	NA	NA	NA	NA	NA	NA	NA	NA	NA	NA	NA	NA	NA	NA	NA	NA
ENSG00000181773	GPR3	protein_coding	human	55.448	60.9167	37.3638	67.4933	58.4149	33.9369	88.7729	90.5163	38.6019	84.3098	63.6689	57.4304	94.916	58.032	65.5611	1.56144	1.4969	0.879516	1.80632	1.45627	0.611968	0.259965	-0.0477569	-0.268043	-0.0233155	-0.617804	-0.665756	-0.318206	-0.840312	-1.18238	0.279461	0.290796	0.321197	0.256441	0.26659	0.347448	0.208038	0.229296	0.317365	0.238367	0.272829	0.261714	0.197362	0.268077	0.259098	5.58731
ENSG00000158195	WASF2	protein_coding	human	3817.96	4190.78	3301.64	3997	4098.38	3457.6	4055.34	4572.28	3038.5	4243.79	3687.7	3354.6	4346.46	3759.42	3663.14	0.300695	0.180934	0.0884019	0.249232	0.2086	0.155234	-0.0340313	0.0285907	0.0657747	-0.0838438	-0.091325	-0.195493	-0.00960994	-0.0511889	-0.0840481	0.0614047	0.0583926	0.059748	0.0502106	0.063431	0.0783446	0.0494448	0.055587	0.0766659	0.0580896	0.0565739	0.0603347	0.0510813	0.0773553	0.0691461	4.89693
ENSG00000241169	FO393419.2	lncRNA	human	0	0	0	0	0	0	0	0	0	0	0	0	0	0	0	NA	NA	NA	NA	NA	NA	NA	NA	NA	NA	NA	NA	NA	NA	NA	NA	NA	NA	NA	NA	NA	NA	NA	NA	NA	NA	NA	NA	NA	NA	NA
ENSG00000237429	BX293535.1	lncRNA	human	0.199599	0	0	0	0.182186	0	0.19321	0.19265	0	0.206365	0	0.169237	0.180468	0.159376	0	1.22054	NA	NA	NA	0.921293	NA	-1.13359	1.0595	NA	-1.32153	NA	-0.746246	0.88249	-0.526457	NA	4.08047	NA	NA	NA	4.08047	NA	4.08047	4.08047	NA	4.08047	NA	4.08047	4.08047	4.08047	NA	0.299116
ENSG00000126705	AHDC1	protein_coding	human	757.365	1110.02	817.017	792.83	1000.07	848.785	675.798	1233.64	775.946	961.767	1010.69	702.03	904.199	946.615	763.424	-0.20179	0.470591	0.208487	-0.263071	0.28851	0.250815	-0.0443863	-0.180551	0.0410248	0.708315	-0.261052	0.426979	0.583003	-0.0359628	0.523853	0.0844152	0.0767845	0.081382	0.07985	0.0792936	0.0966607	0.0795146	0.0688705	0.0930812	0.0744498	0.0725328	0.0810123	0.0732223	0.090369	0.091781	-2.39045
ENSG00000000938	FGR	protein_coding	human	0	0	0	0	0	0.196875	0	0	0.166821	0	0	0	0	0.198997	0.190834	NA	NA	NA	NA	NA	1.35433	NA	NA	0.896211	NA	NA	NA	NA	1.3971	1.29502	NA	NA	NA	NA	NA	4.08047	NA	NA	4.08047	NA	NA	NA	NA	4.08047	4.08047	NA
ENSG00000235912	AL031729.1	processed_pseudogene	human	0.608017	0.71659	0.609655	0.804773	0.668177	0.99039	0.480813	0.410264	0.665008	0.376285	0.395109	0.331868	0.520426	0.740769	0.854236	-1.17798	-1.50382	-0.979183	-0.478564	-1.4807	0.432085	0.718952	0.00170054	1.41854	-0.261152	0.498253	0.21554	-0.96997	1.91929	0.924877	2.53512	2.42671	2.53568	2.18898	2.45322	1.93431	2.72309	3.1344	2.32502	3.16667	3.1689	3.33357	2.68776	2.27783	2.07183	-0.464664
ENSG00000233975	LINC02574	lncRNA	human	0	0	0	0	0	0	0	0	0	0	0	0	0	0	0	NA	NA	NA	NA	NA	NA	NA	NA	NA	NA	NA	NA	NA	NA	NA	NA	NA	NA	NA	NA	NA	NA	NA	NA	NA	NA	NA	NA	NA	NA	NA
ENSG00000126709	IFI6	protein_coding	human	75.6359	93.9074	82.2899	70.771	69.9062	77.5414	57.6804	72.0459	70.2597	78.2005	85.1657	68.9833	50.0555	59.102	59.9768	-0.2765	-0.014078	0.169522	-0.739193	-0.942003	-0.0540145	-0.445443	-0.923778	-0.222692	0.295199	0.18276	0.461453	-0.172983	0.890052	0.694984	0.247432	0.225777	0.222829	0.243199	0.257184	0.248283	0.264061	0.257059	0.242756	0.243566	0.222486	0.243839	0.282235	0.280935	0.267191	-1.11748
ENSG00000225886	AL445490.1	lncRNA	human	0	0.0922998	0	0.171638	0	0.196875	0.15897	0.0939515	0.166821	0.085237	0.0788701	0	0.173057	0.198997	0.340021	NA	0.766694	NA	1.03172	NA	1.35433	0.789963	-0.806158	0.896211	0.54332	-0.30784	NA	-1.04106	1.3971	0.333251	NA	4.0717	NA	4.08047	NA	4.08047	4.08047	4.07175	4.08047	4.07162	4.07171	NA	4.08047	4.08047	3.40135	NA
ENSG00000206767	RNU6-949P	snRNA	human	0	0	0	0	0	0	0	0	0	0	0	0	0	0	0	NA	NA	NA	NA	NA	NA	NA	NA	NA	NA	NA	NA	NA	NA	NA	NA	NA	NA	NA	NA	NA	NA	NA	NA	NA	NA	NA	NA	NA	NA	NA
ENSG00000226662	CHMP1AP1	processed_pseudogene	human	0	0	0	0	0	0	0	0	0	0	0	0	0	0	0	NA	NA	NA	NA	NA	NA	NA	NA	NA	NA	NA	NA	NA	NA	NA	NA	NA	NA	NA	NA	NA	NA	NA	NA	NA	NA	NA	NA	NA	NA	NA
ENSG00000207095	RNU6-424P	snRNA	human	0	0	0	0	0	0	0	0	0	0	0	0	0	0	0	NA	NA	NA	NA	NA	NA	NA	NA	NA	NA	NA	NA	NA	NA	NA	NA	NA	NA	NA	NA	NA	NA	NA	NA	NA	NA	NA	NA	NA	NA	NA
ENSG00000287244	AL020997.5	lncRNA	human	1.66179	1.6469	1.78349	2.30676	1.68581	1.61585	1.61133	0.909949	1.15628	0.961565	1.14312	1.1887	1.62095	0.998766	1.55345	-0.949537	-1.57642	-0.390207	0.0096288	-1.31127	-0.856126	0.977908	0.279831	-0.462587	-0.61126	1.1893	0.571894	-1.28341	0.461782	-0.849686	1.64277	1.67523	1.50215	1.33111	1.63089	1.62104	1.54952	2.03978	1.70954	1.9775	1.79432	1.74858	1.56342	1.90145	1.55409	-0.57801
ENSG00000009780	FAM76A	protein_coding	human	256.206	292.699	210.026	263.88	275.987	202.785	272.731	324.898	172.753	300.27	249.696	218.466	293.28	227.986	217.875	0.351777	0.335091	-0.00624581	0.257982	0.270377	-0.172221	-0.0769456	-0.0628477	-0.166919	0.0180635	-0.341236	-0.342236	0.043663	-0.440131	-0.419474	0.130385	0.136868	0.156818	0.129808	0.13048	0.161125	0.117874	0.123843	0.175413	0.123985	0.150154	0.144714	0.118223	0.148024	0.149488	2.69799
ENSG00000231344	AL020997.1	processed_pseudogene	human	3.2147	2.97289	2.17417	3.85587	3.28227	2.33699	4.16753	3.46522	1.78136	3.3774	2.28758	2.52482	4.31531	2.72825	3.22564	0.565198	-0.0633262	-0.341438	0.825739	0.323152	-0.172801	0.277154	0.397636	0.169166	-0.601824	-0.283216	-0.892885	-0.476918	-0.498663	-0.990302	1.11453	1.17487	1.31563	1.02625	1.11168	1.28542	0.954665	1.09701	1.39113	1.08053	1.29185	1.2267	0.962063	1.19974	1.1128	0.50712
ENSG00000230833	RPEP3	processed_pseudogene	human	2.2555	1.57959	1.38502	2.44017	1.27401	1.03875	2.7335	0.890921	0.656164	1.95344	1.07547	1.68622	1.79931	0.456994	1.49405	0.652699	-0.696647	-0.539238	0.664806	-1.66097	-2.05195	0.023137	-0.92704	-1.50331	-1.31443	0.18535	-1.17458	-2.28726	-0.352461	-2.71187	1.38534	1.55051	1.64979	1.21987	1.8379	2.03398	1.23121	2.1832	2.45431	1.53189	1.89076	1.65964	1.63249	3.0165	1.80579	0.471147
ENSG00000117758	STX12	protein_coding	human	606.669	678.644	577.876	620.653	653.191	595.577	589.567	692.247	534.255	641.683	611.155	545.721	632.195	604.986	575.301	0.0998911	0.0298073	0.149288	-0.0218338	0.0107867	0.172451	-0.105008	-0.0181149	0.0225406	-0.0340485	0.120651	0.065903	0.0642265	0.164004	0.205176	0.0922597	0.0904631	0.0962966	0.0877427	0.0915314	0.0988468	0.0841388	0.0855546	0.101121	0.0866954	0.0914444	0.0936189	0.0840807	0.0950976	0.0927785	1.08272
ENSG00000269971	AL020997.2	lncRNA	human	1.87179	2.28143	2.97669	1.93333	2.681	3.14092	1.00703	2.03277	3.1083	1.25956	2.46233	2.0529	1.70621	2.94377	2.27244	-1.30095	-0.855802	0.471981	-1.47778	-0.338826	0.551416	-0.157358	0.534013	0.0777199	0.434507	1.31758	1.79125	1.18285	0.892686	2.04161	1.50068	1.34863	1.13698	1.56156	1.19725	1.10614	2.05758	1.40391	1.08014	1.76544	1.29822	1.44624	1.62082	1.13921	1.46466	-0.86691
ENSG00000270031	AL020997.3	lncRNA	human	0.647828	0.729866	1.02982	1.22183	1.35074	0.455424	0.82729	1.0546	0.510152	0.348581	0.771287	0.683308	1.53008	0.717629	0.619571	-1.27064	-1.1307	0.419891	0.495511	0.667741	-2.10547	1.7787	1.74941	-2.50949	0.131881	1.52747	1.69734	0.202946	-2.75096	-2.58442	2.48873	2.38789	1.8877	1.84075	1.67041	3.00725	2.241	1.95393	2.62187	3.23305	2.20068	2.29746	1.56033	2.31688	2.64898	-0.510556
ENSG00000223062	RNU6-1245P	snRNA	human	0	0	0.202873	0	0	0	0	0	0.177629	0	0.21295	0.186253	0	0	0	NA	NA	1.41939	NA	NA	NA	NA	NA	-1.02734	NA	1.55757	1.17731	NA	NA	NA	NA	NA	4.08047	NA	NA	NA	NA	NA	4.08047	NA	4.08047	4.08047	NA	NA	NA	NA
ENSG00000286433	AL020997.4	lncRNA	human	0.343205	0.79354	0.360024	0.366085	0.665823	0.161958	0.339322	1.11443	0.175704	0.736844	0.724126	0.333602	0.658101	0.417373	0.160598	0.258769	1.61787	0.457628	0.069955	1.40964	-0.569223	-0.171807	-0.17177	-1.02734	1.39772	-1.16121	0.21554	1.37302	-1.97659	-0.628535	3.35118	2.5337	3.29928	3.2961	2.45594	4.08047	3.28954	2.03855	4.08047	2.51424	2.56791	3.32746	2.45489	3.03704	4.08047	0.0772172
ENSG00000117751	PPP1R8	protein_coding	human	1045.03	1212.08	922.533	1057.95	1157.93	946.855	1079.38	1358.64	850.937	1224.53	1087.19	937.691	1191.89	1063.58	974.475	0.306915	0.32947	0.151638	0.166112	0.299156	0.164719	-0.123503	-0.0281249	0.0124156	0.0572691	-0.176393	-0.13896	0.164049	-0.132097	0.00951428	0.074654	0.0790369	0.0819138	0.0752908	0.0774713	0.0947199	0.0657278	0.0694036	0.0943882	0.0696106	0.0765228	0.0730752	0.0676252	0.0873401	0.0883679	4.11117
ENSG00000252947	SCARNA1	scaRNA	human	1.90336	4.45743	2.22052	3.89521	3.40491	2.89459	2.39867	4.47444	1.86479	2.83115	3.08235	0.995843	3.89619	2.8845	3.31204	-2.11843	0.511796	-0.907246	0.436871	-0.0429506	-0.102543	2.56185	-0.55002	0.813121	2.67654	-1.43123	1.23224	-0.450431	-0.0556621	-0.528283	1.57841	0.999907	1.35355	0.987385	1.0427	1.17175	1.46146	0.983388	1.45772	1.4558	1.2567	1.99148	0.97095	1.15022	1.09329	-1.34213
ENSG00000130775	THEMIS2	protein_coding	human	8.60814	11.5355	11.8212	10.0371	11.7937	11.1791	6.84164	11.2542	10.8444	8.0178	11.4336	8.74482	9.7571	10.9188	9.36298	-0.842615	-0.23096	0.373019	-0.522319	-0.114624	0.152135	0.338842	0.114234	-0.220267	0.639461	0.604725	1.23161	0.439589	0.269591	0.686824	0.686988	0.629878	0.601232	0.636269	0.572803	0.599053	0.729148	0.609327	0.598527	0.71729	0.632018	0.684406	0.616336	0.57661	0.638738	-1.22654
ENSG00000117748	RPA2	protein_coding	human	1003.64	1015.49	791.302	1031.57	971.299	804.491	1116.55	1083.76	699.718	1108.65	883.42	870.718	1093.95	857.384	909.281	0.505106	0.173841	0.0546304	0.410476	0.145561	0.0399476	-0.0780248	-0.0255777	-0.01479	-0.297529	-0.116884	-0.434056	-0.233456	-0.103264	-0.359428	0.0851528	0.0925184	0.0925898	0.0826839	0.0918988	0.103257	0.0646631	0.0780808	0.0949639	0.0743546	0.0819393	0.0749965	0.0703318	0.0918044	0.08603	5.93175
ENSG00000130768	SMPDL3B	protein_coding	human	55.5365	62.1245	43.2364	60.536	55.9878	48.4418	47.2008	47.1373	26.7756	47.7883	35.5587	32.1673	46.5468	35.7861	40.2496	-0.448335	-0.568794	-1.179	-0.382885	-0.815694	-0.777568	0.0820945	-0.247266	0.397266	-0.0864081	-0.615485	-0.714733	-0.401692	0.0365288	-0.387176	0.284179	0.28567	0.33924	0.282332	0.297124	0.332458	0.283251	0.304595	0.401539	0.285841	0.34913	0.347621	0.301793	0.35611	0.338046	-1.57765
ENSG00000227050	AL512288.1	lncRNA	human	0	0.1846	0	1.0569	0.182186	0.211506	0.976777	0.380553	0.181205	0.170474	0.15774	0	1.24425	0.374406	1.12555	NA	1.29666	NA	3.55672	0.921293	1.35433	3.31655	-0.396644	0.896211	1.07291	-0.83787	NA	-2.60387	0.435332	-2.19073	NA	4.05588	NA	2.20687	4.08047	4.08047	2.20503	3.19771	4.08047	4.05584	4.05589	NA	2.01048	3.24891	2.0983	NA
ENSG00000158156	XKR8	protein_coding	human	147.827	188.172	138.622	158.617	166.49	142.533	147.624	196.098	123.658	174.415	163.247	128.5	165.466	148.3	141.324	0.0401067	0.315244	0.0431218	0.052869	0.0750912	0.0612451	0.0290616	-0.239441	0.0176484	0.310941	-0.272013	0.0196068	0.0538537	-0.0117789	0.0190597	0.165806	0.152543	0.176719	0.1689	0.160274	0.174756	0.165986	0.144905	0.182798	0.149513	0.161628	0.175754	0.161518	0.167071	0.177229	0.24189
ENSG00000158161	EYA3	protein_coding	human	891.95	1069.83	923.166	929.208	1041.61	904.805	845.756	1132.67	843.988	971.084	1000.76	838.143	985.883	953.515	854.072	-0.02355	0.100943	0.25823	-0.0951468	0.11812	0.143433	-0.0541545	0.0176632	-0.115391	0.16052	0.158509	0.298544	0.243906	0.0280385	0.248746	0.0780096	0.0739318	0.0760626	0.0730126	0.0847841	0.0864355	0.0723473	0.0775667	0.0845559	0.0734315	0.0717618	0.0763459	0.0786429	0.0914071	0.0822045	-0.301886
ENSG00000238231	AL512288.2	processed_pseudogene	human	1.39147	3.35483	0.996431	1.59601	2.34148	2.11663	1.11944	3.83491	1.24794	2.71251	2.19681	0.606762	2.02101	2.49384	1.8251	-0.73712	1.23971	-1.97643	-0.494811	0.452427	0.616366	0.25862	-0.804074	2.5915	2.00978	-3.22315	-1.21702	0.984662	0.159934	1.11819	1.73693	1.13488	2.14601	1.56505	1.33182	1.46327	1.77001	1.02118	1.98784	1.2965	1.62119	2.49947	1.38476	1.29469	1.49945	-0.42438
ENSG00000240750	RN7SL559P	misc_RNA	human	2.46602	3.27128	2.27869	1.98504	2.1431	2.24979	2.70864	3.76922	2.64339	3.95468	3.66384	2.86194	2.42522	2.64566	2.4773	1.12455	1.43568	1.11685	0.51144	0.598961	1.0448	-0.589008	-0.827537	-0.074007	0.35041	-0.313947	0.0107134	0.117653	0.445832	0.540266	1.26847	1.11976	1.29514	1.36084	1.29359	1.29498	1.17923	0.992752	1.16139	0.9723	1.01001	1.15023	1.21135	1.15603	1.21792	0.886547
ENSG00000228589	SPCS2P4	processed_pseudogene	human	5.26369	6.18494	4.09165	6.45215	5.75762	5.80527	5.66663	5.88426	4.0186	5.38104	4.15491	3.51051	6.1613	5.54697	6.13553	-0.128249	-0.0150436	-0.749957	0.263796	-0.167142	0.27802	0.406728	-0.151274	1.0247	0.146965	-0.721571	-0.604811	-0.398553	0.447596	0.0257056	0.843652	0.799226	0.988922	0.784566	0.817022	0.811803	0.817716	0.819832	0.983867	0.830928	0.989945	1.03494	0.803105	0.828191	0.799272	-0.152016
ENSG00000228943	AL137792.2	processed_pseudogene	human	0	0	0	0	0	0	0	0	0	0	0	0	0	0	0	NA	NA	NA	NA	NA	NA	NA	NA	NA	NA	NA	NA	NA	NA	NA	NA	NA	NA	NA	NA	NA	NA	NA	NA	NA	NA	NA	NA	NA	NA	NA
ENSG00000214812	AL137792.1	processed_pseudogene	human	0	0	0.403065	0.153878	0.507652	0	0.141911	0.531889	0.351408	0	0.423873	0.371665	0.653886	0.441137	0.133614	NA	NA	2.3568	1.03172	2.44107	NA	0.789963	2.57496	-1.96446	NA	2.49686	2.11895	1.43521	-2.04454	-0.628535	NA	NA	3.3748	4.08047	2.8218	NA	4.08047	2.77821	3.50931	NA	3.2833	3.41231	2.46058	2.97901	4.08047	NA
ENSG00000253005	RNU6-176P	snRNA	human	0	0	0	0	0	0	0	0	0	0	0	0	0	0	0	NA	NA	NA	NA	NA	NA	NA	NA	NA	NA	NA	NA	NA	NA	NA	NA	NA	NA	NA	NA	NA	NA	NA	NA	NA	NA	NA	NA	NA	NA	NA
ENSG00000169403	PTAFR	protein_coding	human	13.5506	17.5016	15.26	15.509	16.2094	15.828	14.9894	19.9271	16.3939	16.8349	18.4294	14.6184	17.7225	17.7939	17.0387	0.149433	0.444458	0.629458	0.330121	0.343956	0.656761	0.198559	-0.0973265	0.0277756	0.333206	0.188378	0.498934	0.0472914	0.31534	0.34007	0.534401	0.481881	0.503251	0.523111	0.4913	0.505894	0.517665	0.44502	0.475988	0.476239	0.455575	0.503611	0.484163	0.46791	0.499218	0.279628
ENSG00000126698	DNAJC8	protein_coding	human	2284.9	2328	1940.72	2362.31	2319.69	2028.34	2331.35	2331.98	1696.4	2300.24	1947.9	1915.74	2364.48	2025.2	2062.13	0.2123	-0.129081	-0.0589488	0.125338	-0.0414807	0.00578026	-0.0697453	0.0881859	0.0641206	-0.305652	0.0716969	-0.254592	-0.135674	0.0496595	-0.109028	0.0674847	0.0670787	0.0659775	0.0610116	0.0791418	0.0746987	0.0546756	0.0697743	0.0691127	0.0618416	0.0597315	0.0616755	0.0667181	0.0804624	0.0647102	3.1459
ENSG00000130770	ATP5IF1	protein_coding	human	481.909	610.491	472.351	512.346	599.334	495.375	409.952	616.115	391.528	494.131	484.08	379.207	516.483	497.819	423.205	-0.369232	-0.0591513	-0.218889	-0.3802	-0.0193999	-0.139181	0.0056233	0.0406276	0.08003	0.345669	-0.158328	0.167002	0.39169	-0.116342	0.253148	0.0984177	0.0912752	0.09767	0.0985162	0.092617	0.114971	0.104852	0.0899057	0.121203	0.0965347	0.0967215	0.104719	0.0980089	0.114659	0.123082	-3.75168
ENSG00000270605	AL353622.1	lncRNA	human	15.0945	20.6782	17.911	15.8807	24.9066	20.9477	5.74764	19.104	13.8494	9.49478	12.8208	8.68375	14.4061	19.6076	11.8347	-1.96927	-0.958798	-0.758324	-2.0767	-0.222701	-0.280466	-0.0918553	0.744647	0.477527	1.03221	0.21203	1.22852	1.88903	-0.057013	1.80852	0.574819	0.469688	0.504063	0.564161	0.454091	0.473812	0.776944	0.500261	0.548793	0.640375	0.5587	0.674489	0.594248	0.500612	0.61943	-3.4259
ENSG00000271398	AL353622.2	lncRNA	human	0.456162	0.523664	0.832423	0.486966	0.950645	0.633035	0	0.467673	0.522078	0	0.425899	0.372507	0.437787	0.585993	0.190834	-2.18722	-2.58252	-0.0937428	-2.37588	-0.137107	-1.09074	NA	2.42075	-1.00975	NA	2.50236	2.12161	2.24041	-0.932241	1.29502	2.74645	2.65122	2.15825	2.70374	2.02311	2.41342	NA	3.15147	2.85363	NA	3.27744	3.40937	3.21282	2.74754	4.08047	-0.796379
ENSG00000130766	SESN2	protein_coding	human	238.874	314.12	333.145	268.807	329.466	337.718	160.786	284.298	312.309	195.416	297.456	229.986	240.8	312.92	259.305	-1.11179	-0.549816	0.238479	-0.885486	-0.297663	0.216655	0.243178	0.255575	-0.0222464	0.593389	0.790137	1.36737	0.619471	0.516119	1.11286	0.141005	0.127379	0.114576	0.124531	0.118523	0.118462	0.15921	0.134786	0.12193	0.157618	0.130016	0.143509	0.13344	0.125892	0.131816	-7.88475
ENSG00000130772	MED18	protein_coding	human	172.08	238.108	196.942	192.089	229.879	214.638	130.451	228.05	176.337	168.925	195.269	140.12	182.308	205.725	172.714	-0.807401	-0.16395	-0.115979	-0.637084	-0.170271	0.0678055	0.187644	-0.00505144	0.183216	0.67969	0.0488579	0.708055	0.498133	0.239905	0.715557	0.155881	0.135015	0.144422	0.150877	0.134484	0.146207	0.171884	0.131691	0.152417	0.152394	0.142145	0.164176	0.149227	0.143136	0.160731	-5.1796
ENSG00000204138	PHACTR4	protein_coding	human	2126.96	2471.82	2075.78	2222.88	2404.46	2115.48	2107.08	2636.5	1936.83	2331.76	2270.51	1956.18	2372.36	2244.69	2081.23	0.0929103	0.12577	0.209659	0.0335594	0.14036	0.201262	-0.0416683	0.0156373	-0.00918213	0.0688072	0.0854318	0.133727	0.137767	0.0631083	0.177936	0.0687133	0.0698622	0.0679712	0.0674415	0.0758277	0.078411	0.0561519	0.0618513	0.0671243	0.0581466	0.0566112	0.0569856	0.0628251	0.0732359	0.0680064	1.35214
ENSG00000206779	CR589951.1	misc_RNA	human	0	0	0	0	0	0	0	0	0	0	0	0	0	0	0	NA	NA	NA	NA	NA	NA	NA	NA	NA	NA	NA	NA	NA	NA	NA	NA	NA	NA	NA	NA	NA	NA	NA	NA	NA	NA	NA	NA	NA	NA	NA
ENSG00000229820	CR391992.1	processed_pseudogene	human	3.14637	4.08952	2.82023	3.74594	3.0151	3.25935	3.06977	3.20024	2.3581	3.34132	2.98674	2.24977	2.90763	2.50728	3.14813	-0.339084	0.00972071	-0.511704	-0.0302334	-0.86687	-0.132146	0.325013	-0.876222	0.37668	0.38657	-0.523689	-0.153676	-0.806853	0.743158	-0.0972594	1.16512	1.01225	1.17179	1.03204	1.22872	1.13947	1.13337	1.19596	1.25088	1.10939	1.13575	1.29802	1.2164	1.33351	1.12561	-0.29103
ENSG00000221216	RNU6ATAC27P	snRNA	human	2.34479	3.57097	3.25017	2.37148	2.28172	2.79552	0.998086	1.88449	2.32735	2.01244	2.98399	1.95268	0.786969	1.385	1.49044	-1.68259	-0.496244	-0.0811024	-1.94032	-2.62502	-0.612522	-0.269446	-2.16171	-0.536511	1.249	0.402959	1.62123	-0.651145	2.01708	1.34135	1.37547	1.04051	1.11726	1.38161	1.49869	1.16909	1.94902	1.5898	1.29575	1.43633	1.17405	1.51698	2.17774	1.74326	1.63179	-1.22328
ENSG00000180198	RCC1	protein_coding	human	2665.11	2933.3	2302.35	2878.3	2819.76	2265.84	3219.98	3523.05	2249.62	3299.13	2886.37	2607.64	3422.24	2742.96	2781.95	0.650172	0.546985	0.456557	0.676941	0.531995	0.360526	0.0435596	-0.0137499	-0.0965678	-0.0678468	-0.0888631	-0.177104	-0.113918	-0.168903	-0.305773	0.0547408	0.0607883	0.058266	0.0519636	0.0627858	0.072013	0.0441812	0.0567453	0.0702456	0.0533533	0.0563293	0.0511575	0.0508304	0.0707642	0.0646702	11.8773
ENSG00000242125	SNHG3	lncRNA	human	1638.29	2015.67	1406.64	1949.53	2007.8	1397.09	1907.65	2387.57	1180.3	1969.71	1708.52	1387.15	2292.44	1694.31	1644.19	0.21213	0.394213	-0.0278201	0.491256	0.465922	-0.1136	0.295627	0.0696714	-0.0863379	0.219783	-0.423014	-0.224003	0.00462239	-0.576622	-0.594646	0.151567	0.16099	0.158108	0.148307	0.0946978	0.10853	0.0564628	0.0678439	0.0791197	0.0698189	0.074311	0.0666566	0.0545212	0.0714651	0.0688908	1.39958
ENSG00000274266	SNORA73A	snoRNA	human	0	0	0	0	0	0	0	0	0	0	0	0	0	0	0	NA	NA	NA	NA	NA	NA	NA	NA	NA	NA	NA	NA	NA	NA	NA	NA	NA	NA	NA	NA	NA	NA	NA	NA	NA	NA	NA	NA	NA	NA	NA
ENSG00000200087	SNORA73B	snoRNA	human	297.702	367.589	282.491	379.169	314.818	287.675	370.428	383.123	267.409	359.826	340.291	277.283	392.844	299.199	354.174	0.218845	0.403949	0.259699	0.662184	0.0830971	0.248847	0.456452	-0.318381	-0.0106515	0.223482	-0.142892	0.0538341	-0.546825	0.168241	-0.401312	0.305691	0.155868	0.151282	0.128637	0.138319	0.159383	0.258279	0.132275	0.148945	0.307734	0.145303	0.277991	0.102851	0.134432	0.127717	0.715905
ENSG00000231468	PRDX3P2	processed_pseudogene	human	0.936223	1.07476	0.71342	0.814261	1.15754	0.941132	0.168875	0.528844	0.181205	0.365736	0.17073	0.14777	0.305547	0.484909	0.207607	-1.96481	-2.30704	-2.72886	-3.1163	-1.40319	-1.8317	-1.13359	0.856623	0.896211	-0.260296	-0.482655	-0.746246	1.71435	-0.404363	1.29502	2.07448	2.00093	2.32452	2.24333	1.82984	2.10208	4.08047	2.68017	4.08047	3.19517	4.06596	4.08047	3.41155	2.77025	4.08047	-0.947133
ENSG00000279443	AL513497.1	TEC	human	135.235	152.484	106.251	144.977	146.562	105.809	160.6	184.078	95.6097	168.912	136.726	121.063	174.057	131.179	129.589	0.605661	0.569364	0.16605	0.622108	0.548735	0.0971186	0.0344007	-0.0204266	-0.0690155	0.000543525	-0.401975	-0.422943	-0.0426598	-0.448425	-0.513755	0.176184	0.170882	0.194709	0.176699	0.166017	0.202818	0.165412	0.151494	0.207997	0.159875	0.178168	0.183692	0.157692	0.18076	0.192648	3.43767
ENSG00000180098	TRNAU1AP	protein_coding	human	191.646	253.55	212.132	211.785	237.238	211.959	167.945	251.757	187.57	203.751	224.662	170.939	209.601	209.686	187.472	-0.405797	0.0230778	0.10088	-0.296321	-0.0720023	0.0355502	0.125961	-0.0935829	-0.0660067	0.46457	0.0782925	0.523783	0.255612	0.109297	0.342464	0.151226	0.134718	0.150297	0.139516	0.135323	0.152159	0.151569	0.129654	0.163353	0.144577	0.145528	0.162704	0.135976	0.148144	0.153702	-2.68339
ENSG00000197989	SNHG12	lncRNA	human	341.401	433.029	286.558	406.673	414.423	286.566	421.332	534.39	255.897	447.503	383.638	303.422	500.072	368.142	360.821	0.416349	0.660567	0.129631	0.682528	0.630678	0.0654477	0.282774	-0.0291291	-0.0642506	0.279721	-0.529565	-0.270068	-0.0214969	-0.563225	-0.606504	0.130967	0.117972	0.137233	0.110884	0.11741	0.146889	0.109055	0.103621	0.150444	0.115204	0.121371	0.134336	0.0971748	0.130945	0.125503	3.17904
ENSG00000221539	SNORD99	snoRNA	human	9.49391	14.0989	9.3614	13.0489	11.6026	8.42966	12.7064	16.2796	8.21339	13.685	13.2625	9.17847	15.0346	10.1567	11.4124	0.234691	0.837615	0.358216	0.826816	0.463094	0.00597935	0.605221	-0.373223	-0.351461	0.635734	-0.478519	0.139713	-0.331295	-0.455539	-0.811036	0.649511	0.528025	0.624216	0.5724	0.566394	0.700138	0.59162	0.480724	0.690379	0.544269	0.532476	0.648751	0.52472	0.63798	0.644216	0.361335
ENSG00000278274	SNORA61	snoRNA	human	0	0	0	0	0	0	0	0	0	0	0	0	0	0	0	NA	NA	NA	NA	NA	NA	NA	NA	NA	NA	NA	NA	NA	NA	NA	NA	NA	NA	NA	NA	NA	NA	NA	NA	NA	NA	NA	NA	NA	NA	NA
ENSG00000273544	SNORA44	snoRNA	human	0	0	0	0	0	0	0	0	0	0	0	0	0	0	0	NA	NA	NA	NA	NA	NA	NA	NA	NA	NA	NA	NA	NA	NA	NA	NA	NA	NA	NA	NA	NA	NA	NA	NA	NA	NA	NA	NA	NA	NA	NA
ENSG00000274582	SNORA16A	snoRNA	human	0	0	0	0	0	0	0	0	0	0	0	0	0	0	0	NA	NA	NA	NA	NA	NA	NA	NA	NA	NA	NA	NA	NA	NA	NA	NA	NA	NA	NA	NA	NA	NA	NA	NA	NA	NA	NA	NA	NA	NA	NA
ENSG00000280498	SNORA16A	snoRNA	human	0	0	0	0	0	0	0	0	0	0	0	0	0	0	0	NA	NA	NA	NA	NA	NA	NA	NA	NA	NA	NA	NA	NA	NA	NA	NA	NA	NA	NA	NA	NA	NA	NA	NA	NA	NA	NA	NA	NA	NA	NA
ENSG00000120656	TAF12	protein_coding	human	540.148	583.588	492.379	561.248	572.101	483.712	548.684	603.985	429.69	569.134	519.076	479.36	579.58	498.688	489.198	0.184107	0.011067	0.113472	0.110688	0.0496902	-0.000540731	-0.0562036	0.0392166	-0.11509	-0.137536	0.103936	-0.0540043	-0.0300305	-0.0481143	-0.101217	0.0995013	0.0972745	0.0998841	0.0955972	0.105342	0.113482	0.0900113	0.0955254	0.108766	0.0916393	0.092457	0.0958286	0.0958404	0.113267	0.105773	1.8503
ENSG00000188060	RAB42	protein_coding	human	13.4657	19.6002	17.8416	13.0734	19.1821	17.9744	11.9868	24.3567	19.9124	17.9451	22.2381	16.3176	17.4438	21.879	16.3718	-0.00861671	0.624149	0.872577	-0.305263	0.632465	0.843169	-0.280474	0.00537712	-0.0295668	0.671529	0.246888	0.8988	0.974429	0.213025	1.1615	0.557	0.459422	0.483592	0.561291	0.460497	0.484727	0.573046	0.392846	0.437622	0.469001	0.414228	0.499389	0.480761	0.418135	0.503569	-0.0154698
ENSG00000229388	LINC01715	lncRNA	human	8.54137	11.99	8.08704	10.292	10.7576	9.78873	10.2052	14.4208	9.05727	11.7827	11.0973	8.04391	12.5268	11.7653	11.2581	0.278693	0.75351	0.307466	0.577936	0.574774	0.709147	0.313792	-0.176272	0.398073	0.502523	-0.439611	0.0454953	0.0268086	0.134271	0.139083	0.6803	0.594153	0.703346	0.646892	0.643347	0.67736	0.608377	0.537547	0.660085	0.556499	0.585744	0.666788	0.586297	0.615019	0.617918	0.409661
ENSG00000274978	RNU11	snRNA	human	0	0	0	0	0.162733	0	0	0.169619	0	0	0	0	0.159618	0.14088	0	NA	NA	NA	NA	0.921293	NA	NA	1.0595	NA	NA	NA	NA	0.88249	-0.526457	NA	NA	NA	NA	NA	4.08047	NA	NA	4.08047	NA	NA	NA	NA	4.08047	4.08047	NA	NA
ENSG00000270103	AL360012.1	lncRNA	human	0	0	0	0	0	0	0	0	0	0	0	0	0	0	0	NA	NA	NA	NA	NA	NA	NA	NA	NA	NA	NA	NA	NA	NA	NA	NA	NA	NA	NA	NA	NA	NA	NA	NA	NA	NA	NA	NA	NA	NA	NA
ENSG00000162419	GMEB1	protein_coding	human	533.161	643.874	507.086	570.634	624.927	503.385	584.345	761.108	487.432	653.86	619.842	516.342	678.542	598.008	548.631	0.336209	0.465217	0.380475	0.342504	0.471493	0.302411	0.0234775	0.00681573	-0.0783957	0.164907	-0.0834692	0.0609229	0.159447	-0.166221	-0.0296909	0.0917959	0.087602	0.0956572	0.0924601	0.0991222	0.102847	0.087721	0.0891035	0.10251	0.0830684	0.0873805	0.091644	0.0949627	0.105119	0.10052	3.66257
ENSG00000252777	AL645729.1	scaRNA	human	0.336455	0.157235	0.12825	0.503192	0.314925	0.131509	0.522628	0.169619	0	0.206365	0	0.169237	0.518451	0.14088	0.309785	0.258768	-1.09864	-0.50416	1.01736	-0.0404759	-0.569223	0.774289	1.0595	NA	-1.32153	NA	-0.746246	-1.02689	-0.526457	-1.5838	3.37481	4.08047	4.08047	2.75196	3.43647	4.08047	2.65416	4.08047	NA	4.08047	NA	4.08047	2.68932	4.08047	3.47105	0.0766765
ENSG00000198492	YTHDF2	protein_coding	human	2197.66	2293.79	1844.64	2373.06	2209.12	1871.98	2542.7	2522.78	1717.53	2484.72	2104.44	2002.86	2583.41	2053.69	2190.55	0.494181	0.24932	0.215953	0.521956	0.2362	0.196227	0.0446869	-0.0118561	-0.0200254	-0.209258	-0.032145	-0.261596	-0.25473	-0.0378069	-0.314999	0.056821	0.0607908	0.0627867	0.0535693	0.0614734	0.0712138	0.0466218	0.055692	0.0719048	0.0539282	0.0594564	0.0561878	0.0510407	0.0683842	0.0635941	8.69715
ENSG00000116329	OPRD1	protein_coding	human	1.20595	1.39445	0.499961	0.64834	0.828085	1.12141	1.15085	1.53921	0.871756	1.86935	1.08992	0.93921	0.773529	1.23881	1.06411	1.51891	1.47599	-0.491148	-0.0734525	0.465738	1.42751	-1.55186	-0.989132	1.9068	-0.0278859	-1.95509	-1.97727	0.554701	0.955477	1.48902	1.9222	1.75831	2.74574	2.51913	2.15015	1.98269	2.00595	1.61249	2.2301	1.45427	1.9855	2.18332	2.30315	1.82592	2.09974	0.790192
ENSG00000233427	AL009181.2	lncRNA	human	0.447312	0.68367	0.459373	0.464402	0.979407	0.459892	0.327845	1.08662	0.344449	0.521131	0.52843	0.334023	0.83954	0.787627	0.340021	-0.526793	0.356622	-0.330402	-0.718089	1.0679	-0.397499	-0.171807	0.638407	-0.0655584	0.91195	-0.674609	0.21554	1.84846	-1.49314	0.333251	3.04023	2.59842	3.01627	3.01938	2.02383	3.06976	3.32944	1.89459	3.30977	2.78113	2.81589	3.32598	2.15213	2.20377	3.40135	-0.173274
ENSG00000199756	AL009181.1	misc_RNA	human	0	0	0	0	0	0	0	0	0	0	0	0	0	0	0	NA	NA	NA	NA	NA	NA	NA	NA	NA	NA	NA	NA	NA	NA	NA	NA	NA	NA	NA	NA	NA	NA	NA	NA	NA	NA	NA	NA	NA	NA	NA
ENSG00000159023	EPB41	protein_coding	human	765.623	963.126	839.472	819.571	930.559	854.108	615.32	899.898	722.466	734.657	815.42	648.392	759.243	799.172	703.4	-0.532869	-0.232277	-0.0258908	-0.522238	-0.23528	-0.039384	0.0276624	-0.00245922	-0.014095	0.336305	0.207771	0.52368	0.317905	0.198349	0.493364	0.082566	0.0810802	0.0812393	0.0817248	0.0881528	0.0893557	0.0826634	0.0828604	0.0878062	0.0804185	0.0790776	0.0818875	0.0861144	0.0929476	0.0893559	-6.45385
ENSG00000225616	AL138785.2	processed_pseudogene	human	0.373198	0.214529	0.180185	0	0.147916	0.165113	0.362084	0.373504	0.298098	0.584725	0.371833	0.482194	0.145929	0.296364	0.161583	2.14914	0.941774	1.41939	NA	0.921293	1.35433	-2.05774	-0.00133566	-0.0655592	-1.20501	0.496291	-0.708932	0.88249	0.435329	1.29502	3.20414	4.06594	4.08047	NA	4.08047	4.08047	3.16541	3.23743	3.48432	2.55745	3.23612	2.73283	4.08047	3.52995	4.08047	0.670738
ENSG00000206704	AL138785.1	misc_RNA	human	0	0	0	0	0	0	0	0	0	0	0	0	0	0	0	NA	NA	NA	NA	NA	NA	NA	NA	NA	NA	NA	NA	NA	NA	NA	NA	NA	NA	NA	NA	NA	NA	NA	NA	NA	NA	NA	NA	NA	NA	NA
ENSG00000277958	AL138785.3	misc_RNA	human	0.169606	0.194015	0.158492	0.352552	0.369991	0.161958	0.15897	0.19265	0	0	0	0	0.353525	0.159376	0.149187	-0.703018	-1.09864	-0.50416	0.0699548	-0.040475	-0.569223	0.789963	1.0595	NA	NA	NA	NA	-0.0792794	-0.526457	-0.628535	4.08047	4.08047	4.08047	3.33996	3.24684	4.08047	4.08047	4.08047	NA	NA	NA	NA	3.28368	4.08047	4.08047	-0.172288
ENSG00000253304	TMEM200B	protein_coding	human	4.44504	8.73381	8.19694	5.66747	7.9213	7.92569	2.60064	8.91003	8.12177	5.23517	9.09366	5.24307	5.8019	8.0556	6.0603	-1.98664	0.182874	0.540561	-1.02905	0.0120599	0.385791	0.982981	-0.169257	-0.154627	2.20831	0.358142	2.54849	1.07146	0.377072	1.43144	1.05295	0.655089	0.686383	0.829501	0.687905	0.73322	1.24676	0.64816	0.717738	0.981547	0.645065	1.00794	0.820051	0.723518	0.855151	-1.88674
ENSG00000225750	AL357500.1	lncRNA	human	3.27805	3.05587	2.19296	4.36206	2.20607	3.52459	4.23776	1.86942	2.43375	3.02882	1.91891	2.19337	3.25731	2.54269	4.39452	0.224198	-0.517977	-0.882551	0.750848	-1.75891	0.510842	0.540613	-1.26363	1.3915	-0.704451	-0.395166	-1.08629	-2.48259	2.27129	-0.227369	1.06739	1.18063	1.35021	0.966476	1.40376	1.03605	0.970545	1.56494	1.29678	1.17401	1.49692	1.35476	1.27851	1.35639	0.960061	0.210044
ENSG00000116350	SRSF4	protein_coding	human	1447.92	1696.24	1477.98	1571.27	1610.1	1484.21	1404.7	1681.57	1343.29	1510.69	1541.89	1318.57	1554.99	1467.3	1431.08	-0.0756112	-0.019037	0.17248	-0.0278365	-0.0731712	0.122547	0.0649697	-0.0528811	-0.0502845	0.0922811	0.192846	0.264659	-0.0144652	0.198234	0.160925	0.0648083	0.0646782	0.0645136	0.0671921	0.0683922	0.07362	0.0663952	0.0650197	0.0734998	0.0640623	0.0634884	0.0642614	0.0695302	0.0756712	0.0770154	-1.16669
ENSG00000277916	AL357500.2	misc_RNA	human	0	0	0	0	0	0	0	0	0	0	0	0	0	0	0	NA	NA	NA	NA	NA	NA	NA	NA	NA	NA	NA	NA	NA	NA	NA	NA	NA	NA	NA	NA	NA	NA	NA	NA	NA	NA	NA	NA	NA	NA	NA
ENSG00000116353	MECR	protein_coding	human	267.896	300.109	235.415	279.127	290.84	246.837	262.834	306.02	203.062	281.389	247.326	220.934	284.199	250.7	240.602	0.0713175	0.00111417	-0.110134	0.00554783	0.00567911	-0.0329698	-0.0484721	0.00597299	0.0767205	-0.0343072	-0.110355	-0.164827	0.0312978	-0.0366105	-0.0274606	0.125773	0.122067	0.137372	0.122079	0.119642	0.137478	0.123236	0.117274	0.151171	0.12253	0.135733	0.139907	0.118465	0.133357	0.137423	0.567034
ENSG00000237934	AL590729.1	lncRNA	human	0	0.399683	0	0	0	0	0	0.406667	0	0.371108	0.34146	0	0	0	0	NA	2.01226	NA	NA	NA	NA	NA	-2.04989	NA	1.79266	-1.55765	NA	NA	NA	NA	NA	3.42718	NA	NA	NA	NA	NA	3.3502	NA	3.39494	3.57323	NA	NA	NA	NA	NA
ENSG00000060656	PTPRU	protein_coding	human	837.926	907.833	859.599	894.994	875.852	878.563	631.946	639.655	658.07	626.362	665.889	620.796	644.82	654.57	675.46	-0.678171	-0.900271	-0.355857	-0.677292	-0.921867	-0.356171	0.0176771	-0.018609	-0.00198575	-0.186664	0.546778	0.339057	-0.213063	0.566851	0.330689	0.0781943	0.0816589	0.0827199	0.080858	0.0859383	0.100012	0.0852075	0.0942834	0.106898	0.0862093	0.0908684	0.0882053	0.0939714	0.11039	0.105761	-8.6729
ENSG00000230523	LINC01756	lncRNA	human	0	0	0	0	0	0	0	0	0	0	0	0	0	0	0	NA	NA	NA	NA	NA	NA	NA	NA	NA	NA	NA	NA	NA	NA	NA	NA	NA	NA	NA	NA	NA	NA	NA	NA	NA	NA	NA	NA	NA	NA	NA
ENSG00000225011	AL671862.1	unprocessed_pseudogene	human	0	0	0	0	0	0	0	0	0	0	0	0	0	0	0	NA	NA	NA	NA	NA	NA	NA	NA	NA	NA	NA	NA	NA	NA	NA	NA	NA	NA	NA	NA	NA	NA	NA	NA	NA	NA	NA	NA	NA	NA	NA
ENSG00000228176	AC092265.1	lncRNA	human	1.00603	1.25171	0.637106	1.389	1.20271	0.828598	1.30653	1.39988	0.464919	1.17584	0.779173	0.605027	1.52464	0.943111	1.1056	0.144446	0.371236	-1.10187	0.770387	0.31724	-0.307697	0.62107	-0.0491416	0.775926	0.247385	-1.44562	-1.21277	-0.415011	-0.616906	-1.05004	1.98007	1.74131	2.50445	1.67258	1.83065	2.19846	1.66589	1.62181	2.78065	1.72639	2.18207	2.50157	1.56187	2.04856	1.87273	0.07295
ENSG00000284676	AL645944.2	lncRNA	human	0	0	0	0	0	0	0	0	0	0	0	0	0	0	0	NA	NA	NA	NA	NA	NA	NA	NA	NA	NA	NA	NA	NA	NA	NA	NA	NA	NA	NA	NA	NA	NA	NA	NA	NA	NA	NA	NA	NA	NA	NA
ENSG00000270927	AL645944.1	processed_pseudogene	human	0	0	0	0	0	0	0	0	0	0	0	0	0	0	0	NA	NA	NA	NA	NA	NA	NA	NA	NA	NA	NA	NA	NA	NA	NA	NA	NA	NA	NA	NA	NA	NA	NA	NA	NA	NA	NA	NA	NA	NA	NA
ENSG00000233399	LINC01648	lncRNA	human	0	0	0	0	0	0	0	0	0	0	0	0	0	0	0	NA	NA	NA	NA	NA	NA	NA	NA	NA	NA	NA	NA	NA	NA	NA	NA	NA	NA	NA	NA	NA	NA	NA	NA	NA	NA	NA	NA	NA	NA	NA
ENSG00000233372	AL137076.1	lncRNA	human	0	0	0	0	0	0	0	0	0	0	0	0	0	0	0	NA	NA	NA	NA	NA	NA	NA	NA	NA	NA	NA	NA	NA	NA	NA	NA	NA	NA	NA	NA	NA	NA	NA	NA	NA	NA	NA	NA	NA	NA	NA
ENSG00000231251	AL021921.1	processed_pseudogene	human	0	0	0	0	0	0	0	0	0	0	0	0	0	0	0	NA	NA	NA	NA	NA	NA	NA	NA	NA	NA	NA	NA	NA	NA	NA	NA	NA	NA	NA	NA	NA	NA	NA	NA	NA	NA	NA	NA	NA	NA	NA
ENSG00000236335	AL161638.2	lncRNA	human	0	0	0	0	0	0	0	0	0	0	0	0	0	0	0	NA	NA	NA	NA	NA	NA	NA	NA	NA	NA	NA	NA	NA	NA	NA	NA	NA	NA	NA	NA	NA	NA	NA	NA	NA	NA	NA	NA	NA	NA	NA
ENSG00000231949	AL161638.1	lncRNA	human	0	0	0	0	0	0	0	0	0	0	0	0	0	0	0	NA	NA	NA	NA	NA	NA	NA	NA	NA	NA	NA	NA	NA	NA	NA	NA	NA	NA	NA	NA	NA	NA	NA	NA	NA	NA	NA	NA	NA	NA	NA
ENSG00000162510	MATN1	protein_coding	human	2.38925	1.31131	1.31859	2.74673	1.76923	1.57339	3.28035	1.30843	1.17294	1.99555	0.918741	1.86108	2.75236	1.57191	2.41593	1.02241	-1.16017	-0.376681	1.16722	-0.0407958	0.0580388	0.149208	1.11786	0.431595	-2.10686	0.790989	-1.36419	-1.17636	0.0983205	-1.09844	1.31843	1.80891	1.77892	1.24462	1.56033	1.68805	1.05033	1.78843	1.85637	1.46483	2.0314	1.48035	1.22879	1.66053	1.33861	0.775473
ENSG00000186056	MATN1-AS1	lncRNA	human	51.0083	68.0291	51.9547	56.8787	66.6086	57.5827	40.8778	66.1455	43.388	50.1634	51.2578	37.6182	54.9894	55.7698	47.3732	-0.666383	-0.152846	-0.366873	-0.515404	-0.127786	-0.112029	0.167543	0.0250225	0.254265	0.548587	-0.212068	0.316054	0.419775	0.0187046	0.413336	0.286011	0.257988	0.283869	0.29185	0.248239	0.279588	0.315743	0.244323	0.297321	0.278234	0.279293	0.309172	0.27831	0.264376	0.310107	-2.32992
ENSG00000287510	AL137857.1	lncRNA	human	0	0	0	0	0	0.361988	0	0	0.308099	0	0	0	0	0.366363	0.352416	NA	NA	NA	NA	NA	2.19249	NA	NA	1.73095	NA	NA	NA	NA	2.23423	2.12988	NA	NA	NA	NA	NA	3.30694	NA	NA	3.39699	NA	NA	NA	NA	3.22478	3.311	NA
ENSG00000162511	LAPTM5	protein_coding	human	2.97725	2.83363	2.59811	2.72215	2.53306	2.85225	2.93638	2.58966	2.63684	3.05385	2.66918	2.75604	2.49526	2.64534	2.794	0.43695	-0.0631224	0.261859	0.0388478	-0.284713	0.483343	-0.385493	-0.222787	0.212625	-0.462589	0.327513	-0.156999	-0.306199	0.772043	0.440295	1.22093	1.17542	1.2733	1.39035	1.22199	1.23786	2.8421	1.2038	1.30926	1.17684	1.24395	1.30439	1.41856	1.25658	1.45747	0.357884
ENSG00000264773	MIR4420	miRNA	human	0	0	0	0	0	0	0	0	0	0	0	0	0	0	0	NA	NA	NA	NA	NA	NA	NA	NA	NA	NA	NA	NA	NA	NA	NA	NA	NA	NA	NA	NA	NA	NA	NA	NA	NA	NA	NA	NA	NA	NA	NA
ENSG00000229607	AL137027.1	lncRNA	human	0	0	0	0	0	0	0	0	0	0	0	0	0	0	0	NA	NA	NA	NA	NA	NA	NA	NA	NA	NA	NA	NA	NA	NA	NA	NA	NA	NA	NA	NA	NA	NA	NA	NA	NA	NA	NA	NA	NA	NA	NA
ENSG00000223382	LINC01778	lncRNA	human	3.25108	3.70387	2.975	3.13562	3.4262	3.34927	3.13055	3.86814	3.00837	3.65318	3.34519	2.93712	3.28142	3.47706	3.20526	0.239169	0.183438	0.155659	-0.066442	0.0838865	0.409319	-0.289978	-0.0959527	0.252245	-0.0208521	-0.028512	-0.0668904	0.182136	0.324671	0.485495	1.07259	1.00849	1.1014	1.09064	1.03334	1.05466	1.08461	0.980657	1.07958	1.00094	1.04313	1.10676	1.06086	1.02424	1.07961	0.222983
ENSG00000222784	RN7SKP91	misc_RNA	human	0	0	0	0	0	0	0	0	0	0	0	0	0	0	0	NA	NA	NA	NA	NA	NA	NA	NA	NA	NA	NA	NA	NA	NA	NA	NA	NA	NA	NA	NA	NA	NA	NA	NA	NA	NA	NA	NA	NA	NA	NA
ENSG00000235143	AL445235.1	lncRNA	human	0	0	0	0	0	0	0	0	0	0	0	0	0	0	0	NA	NA	NA	NA	NA	NA	NA	NA	NA	NA	NA	NA	NA	NA	NA	NA	NA	NA	NA	NA	NA	NA	NA	NA	NA	NA	NA	NA	NA	NA	NA
ENSG00000162512	SDC3	protein_coding	human	904.89	962.894	800.417	969.07	917.215	833.021	823.589	808.065	616.107	808.729	708.829	673.888	824.22	701.826	750.685	-0.215562	-0.45948	-0.395575	-0.205937	-0.520465	-0.335223	0.0269203	-0.0602942	0.0597726	-0.20686	0.0641187	-0.1633	-0.2834	0.186944	-0.118841	0.0849884	0.0901029	0.087951	0.0817451	0.0891472	0.0961726	0.0736221	0.0852873	0.0921842	0.0814568	0.085504	0.0811549	0.0786842	0.0924367	0.0867641	-2.53638
ENSG00000266210	RN7SL371P	misc_RNA	human	0	0	0	0	0	0	0	0	0	0	0	0	0	0	0	NA	NA	NA	NA	NA	NA	NA	NA	NA	NA	NA	NA	NA	NA	NA	NA	NA	NA	NA	NA	NA	NA	NA	NA	NA	NA	NA	NA	NA	NA	NA
ENSG00000134644	PUM1	protein_coding	human	3124.29	3651.37	2960.27	3303.39	3514.64	3048.44	3005.8	3727.87	2613.12	3310.84	3134.89	2683.2	3368.71	3099.51	2913.96	-0.0240438	0.0255864	0.0133056	-0.0524775	0.0115391	0.0342159	-0.011309	-0.0125979	0.0200811	0.0852183	-0.010756	0.054093	0.0951653	0.0249119	0.096692	0.0529228	0.057411	0.0538546	0.0505399	0.0576969	0.0725986	0.0459433	0.0543054	0.0696556	0.0533183	0.053998	0.0503813	0.0503458	0.071053	0.0668024	-0.454317
ENSG00000237329	AL356320.2	processed_pseudogene	human	0	0	0	0	0	0	0	0	0	0	0	0	0	0	0	NA	NA	NA	NA	NA	NA	NA	NA	NA	NA	NA	NA	NA	NA	NA	NA	NA	NA	NA	NA	NA	NA	NA	NA	NA	NA	NA	NA	NA	NA	NA
ENSG00000232768	AL356320.1	processed_pseudogene	human	0	0	0	0	0	0	0	0	0	0	0	0	0	0	0	NA	NA	NA	NA	NA	NA	NA	NA	NA	NA	NA	NA	NA	NA	NA	NA	NA	NA	NA	NA	NA	NA	NA	NA	NA	NA	NA	NA	NA	NA	NA
ENSG00000215900	SELENOWP1	processed_pseudogene	human	0	0	0	0	0	0	0	0	0	0	0	0	0	0	0	NA	NA	NA	NA	NA	NA	NA	NA	NA	NA	NA	NA	NA	NA	NA	NA	NA	NA	NA	NA	NA	NA	NA	NA	NA	NA	NA	NA	NA	NA	NA
ENSG00000225142	AC114495.1	processed_pseudogene	human	0	0	0	0	0	0	0	0	0	0	0	0	0	0	0	NA	NA	NA	NA	NA	NA	NA	NA	NA	NA	NA	NA	NA	NA	NA	NA	NA	NA	NA	NA	NA	NA	NA	NA	NA	NA	NA	NA	NA	NA	NA
ENSG00000084628	NKAIN1	protein_coding	human	23.5816	30.4493	22.9067	29.0756	26.3701	23.6331	27.7927	32.4604	21.7984	29.0425	28.0048	21.88	30.8529	25.1559	27.3926	0.151048	0.460203	0.249146	0.527976	0.15292	0.276487	0.392739	-0.306887	0.0268506	0.341342	-0.207327	0.114225	-0.344366	0.125851	-0.239375	0.415741	0.370033	0.425187	0.396238	0.412026	0.448874	0.382693	0.359408	0.442409	0.355492	0.369567	0.413742	0.385116	0.434529	0.419332	0.363322
ENSG00000060688	SNRNP40	protein_coding	human	1322.17	1484.21	1191.95	1420.9	1467.12	1233.93	1414.54	1638.82	1106.17	1474.65	1332.27	1185.52	1562.9	1357.18	1313.68	0.247712	0.184089	0.147643	0.26441	0.243237	0.182359	0.0334039	0.0607831	0.0341435	-0.0282534	-0.034852	-0.0835505	0.010127	-0.0585826	-0.0715579	0.0691417	0.0708882	0.07016	0.0655278	0.0706578	0.0795654	0.0599636	0.0639453	0.0765526	0.0656364	0.0665356	0.0657251	0.0609841	0.074893	0.0725182	3.58267
ENSG00000229447	AC114495.2	processed_pseudogene	human	6.91697	10.7608	6.08675	9.98746	9.78089	6.46157	7.30151	10.9107	3.60522	7.8564	6.9086	3.92131	10.102	6.50689	6.75323	-0.823364	0.165857	-1.09426	0.144881	-0.023099	-0.919038	0.987802	-0.186991	0.171905	1.02582	-1.25858	-0.251608	-0.136659	-0.897099	-1.05715	0.749403	0.623718	0.842302	0.622699	0.628085	0.798221	0.721015	0.614753	1.02823	0.720127	0.820119	0.979717	0.61404	0.785837	0.777661	-1.09869
ENSG00000121766	ZCCHC17	protein_coding	human	446.94	477.513	373.654	452.81	466.208	404.56	466.737	514.728	349.287	491.053	412.941	386.03	486.783	433.923	421.167	0.341496	0.14709	0.0353501	0.202354	0.172973	0.19486	-0.122448	0.0269123	0.158787	-0.158822	-0.110603	-0.2896	0.00181377	0.0243133	0.00294993	0.102815	0.100473	0.108102	0.0976485	0.103093	0.112167	0.0942349	0.0958483	0.114358	0.0970603	0.102676	0.105703	0.0945817	0.108824	0.105168	3.32144
ENSG00000229044	AL451070.1	lncRNA	human	0	0	0.180185	0	0	0	0	0	0.15682	0	0.18866	0.165187	0	0	0	NA	NA	1.41939	NA	NA	NA	NA	NA	-1.02734	NA	1.55757	1.17731	NA	NA	NA	NA	NA	4.08047	NA	NA	NA	NA	NA	4.08047	NA	4.08047	4.08047	NA	NA	NA	NA
ENSG00000121769	FABP3	protein_coding	human	0.169606	0.286315	0.158492	0.334792	0.187804	0.161958	0.141911	0.0939515	0	0.085237	0.0788701	0	0.154182	0	0.133614	-0.703018	-0.193035	-0.50416	0.0699545	-1.00226	-0.569223	0.789963	-0.806158	NA	0.54332	-0.30784	NA	-1.04106	NA	-0.628535	4.08047	3.60511	4.08047	3.40168	4.08047	4.08047	4.08047	4.07175	NA	4.07162	4.07171	NA	4.08047	NA	4.08047	-0.172288
ENSG00000168528	SERINC2	protein_coding	human	1003.17	1067.57	859.892	1042.59	1001.94	888.451	910.912	912.702	651.758	925.867	784.389	745.611	897.236	756.402	796.188	-0.13484	-0.370004	-0.413148	-0.216679	-0.478765	-0.376579	-0.064236	-0.108485	0.0352178	-0.198218	-0.0427102	-0.261602	-0.230483	0.103751	-0.150097	0.0859129	0.0929601	0.0883941	0.0797768	0.0863811	0.102029	0.072687	0.0858491	0.0993439	0.0864292	0.0898944	0.0832965	0.073642	0.09601	0.0910896	-1.56949
ENSG00000215899	AC209007.1	processed_pseudogene	human	0	0	0	0	0	0	0	0	0	0	0	0	0	0	0	NA	NA	NA	NA	NA	NA	NA	NA	NA	NA	NA	NA	NA	NA	NA	NA	NA	NA	NA	NA	NA	NA	NA	NA	NA	NA	NA	NA	NA	NA	NA
ENSG00000206981	RNU6-40P	snRNA	human	0	0	0	0	0	0	0	0	0	0	0	0	0	0	0	NA	NA	NA	NA	NA	NA	NA	NA	NA	NA	NA	NA	NA	NA	NA	NA	NA	NA	NA	NA	NA	NA	NA	NA	NA	NA	NA	NA	NA	NA	NA
ENSG00000260386	LDC1P	transcribed_unitary_pseudogene	human	0	0	0	0	0	0.165113	0	0	0.141278	0	0	0	0	0.167366	0.161583	NA	NA	NA	NA	NA	1.35433	NA	NA	0.896211	NA	NA	NA	NA	1.3971	1.29502	NA	NA	NA	NA	NA	4.08047	NA	NA	4.08047	NA	NA	NA	NA	4.08047	4.08047	NA
ENSG00000265961	AC209007.2	misc_RNA	human	0	0	0	0	0	0	0	0	0	0	0	0	0	0	0	NA	NA	NA	NA	NA	NA	NA	NA	NA	NA	NA	NA	NA	NA	NA	NA	NA	NA	NA	NA	NA	NA	NA	NA	NA	NA	NA	NA	NA	NA	NA
ENSG00000284543	LINC01226	lncRNA	human	0.469006	0.631141	1.18179	0.654132	0.684335	0.809333	0.141911	0.263571	0.956187	0.085237	0.857801	0.681814	0.3138	0.507244	0.48603	-2.22142	-1.70062	0.799956	-1.44392	-1.55552	-0.265706	0.789963	0.15387	-1.06034	0.54332	2.48358	3.01725	-0.07928	1.27829	1.17394	2.91662	2.51511	1.86681	2.49408	2.43722	2.21236	4.08047	3.65912	2.04124	4.07162	2.24456	2.511	3.42486	2.73252	2.79785	-0.76164
ENSG00000229167	AC114488.1	lncRNA	human	5.51965	5.10169	3.42558	4.59489	5.64735	4.84377	4.42523	4.92646	2.79539	4.8743	2.74942	3.30395	4.43089	4.69039	3.78891	0.134426	-0.483378	-1.3583	-0.639598	-0.0939763	-0.129826	-0.752147	0.387169	1.22996	-0.579496	-0.852468	-1.47072	0.568177	-0.0286015	0.523619	0.828739	0.875646	1.11218	0.979897	0.830705	0.895197	0.967545	0.885837	1.17621	0.86383	1.18859	1.10791	0.991643	0.901392	1.06245	0.162205
ENSG00000142910	TINAGL1	protein_coding	human	47.9779	49.0114	30.9821	52.5597	41.1578	35.4396	59.8364	50.8894	27.7796	57.1458	38.9163	38.3513	54.2039	36.7726	46.6265	0.732584	0.427597	-0.25644	0.793366	0.0684105	0.0634609	0.0777434	-0.356863	0.321634	-0.273499	-0.684665	-0.970871	-0.694349	-0.00286617	-0.719185	0.281812	0.294851	0.350707	0.274246	0.302944	0.342841	0.247435	0.287086	0.377444	0.26463	0.330474	0.317093	0.26754	0.33364	0.304982	2.59955
ENSG00000121764	HCRTR1	protein_coding	human	0.173599	0	0.58459	0.325516	0.182186	0.590624	0.469756	0.19265	1.01061	0.180183	0.613546	0.685042	0.507708	0.756367	0.855302	1.22054	NA	2.90142	1.87838	0.921293	2.87778	0.682311	1.0595	-0.0394017	-1.32153	3.03961	1.69734	-0.933133	1.95216	0.985646	4.08047	NA	2.54017	3.38925	4.08047	2.97124	2.74349	4.08047	1.97905	4.08047	2.48556	2.29593	2.70896	2.53392	2.29444	0.299116
ENSG00000162517	PEF1	protein_coding	human	1103.05	1151.28	918.595	1181.92	1144.84	959.302	1125.29	1133.97	753.853	1094.46	905.927	874.405	1165.13	941.145	975.441	0.109506	-0.168647	-0.234455	0.119071	-0.0885591	-0.166689	0.0262449	0.0807615	0.0670898	-0.242363	-0.0648406	-0.327406	-0.176585	-0.075953	-0.275139	0.0801662	0.0796863	0.0818893	0.0724415	0.0839084	0.0899281	0.0689323	0.0767229	0.0895095	0.0759188	0.0781655	0.0799854	0.0720075	0.0892778	0.080576	1.36598
ENSG00000235790	PEF1-AS1	lncRNA	human	1.42485	1.49256	1.85515	0.912365	0.972562	1.10292	0.840483	0.880021	1.4016	1.36505	1.82789	1.70253	0.33465	0.589436	0.548829	-0.0125459	-0.185144	0.795464	-2.07591	-2.18874	-0.77004	-2.05578	-1.97484	-1.59685	-0.137684	0.961757	0.833083	-0.0792796	1.44645	1.3499	1.69915	1.66278	1.44952	2.21128	2.15198	2.06076	2.24783	2.22931	1.7768	1.70055	1.45877	1.5072	3.3475	2.76969	2.86664	-0.00738358
ENSG00000264078	AC114488.2	lncRNA	human	0.692503	0.366428	0.501301	0.512222	0.354703	0.304651	0.521055	0	0.177629	0.386548	0.21295	0.50326	0.173057	0	0.149187	0.237206	-2.05461	-0.49111	-0.878639	-1.95812	-1.52519	-1.09216	NA	-1.02734	-2.24887	1.55757	-0.708569	-1.04106	NA	-0.628535	2.33018	3.25935	2.74348	2.73708	3.24536	3.52367	2.65713	NA	4.08047	3.08678	4.08047	2.69758	4.08047	NA	4.08047	0.101797
ENSG00000084636	COL16A1	protein_coding	human	175.929	192.777	141.721	198.579	205.664	147.277	217.821	249.089	135.364	214.096	176.336	160.336	250.837	193.136	186.308	0.602987	0.492656	0.22426	0.734418	0.719201	0.262414	0.148082	0.226898	0.0383344	-0.0745256	-0.266999	-0.362307	0.0154329	-0.455939	-0.461486	0.157671	0.153011	0.175008	0.146158	0.144219	0.185777	0.139164	0.133246	0.193845	0.144307	0.161749	0.166588	0.127822	0.164661	0.167525	3.82434
ENSG00000121753	ADGRB2	protein_coding	human	566.425	691.365	601.466	601.683	686.98	617.553	432.798	621.571	490.069	504.673	546.636	445.929	535.736	557.668	485.039	-0.631234	-0.409794	-0.205612	-0.648478	-0.330263	-0.193603	0.000128263	0.0790451	0.0111014	0.258698	0.205575	0.441989	0.348801	0.138741	0.465181	0.10504	0.105339	0.115245	0.106501	0.104508	0.120225	0.0990917	0.0964074	0.123195	0.0972881	0.109123	0.10935	0.098458	0.111438	0.114499	-6.00946
ENSG00000266580	MIR4254	miRNA	human	1.8752	2.17309	1.9097	2.98043	3.08201	1.9955	2.6457	3.16	1.76224	1.89071	1.93198	1.66621	3.90094	2.80297	2.70221	-0.0991252	0.0171987	0.132074	0.908861	0.910049	0.229837	1.0095	0.833233	0.105708	0.163741	0.10403	0.245162	0.0304312	-0.644672	-0.646622	1.48785	1.47465	1.48311	1.27612	1.19148	1.54625	1.2261	1.12107	1.46158	1.39571	1.40821	1.43086	1.00355	1.19303	1.27999	-0.0666231
ENSG00000254545	AL354919.2	lncRNA	human	0.319306	0.795485	0.681486	0.512222	0.354703	0.304651	0.15897	0.435227	0.334448	0.396355	0.767955	0.35144	0.173057	0	0.149187	-1.66076	0.117064	0.39667	-0.878639	-1.95812	-1.52519	0.789963	-2.1281	-1.90509	1.86905	0.280214	2.05276	-1.04106	NA	-0.628535	3.3912	2.37731	2.34437	2.73708	3.24536	3.52367	4.08047	3.26732	3.29573	3.313	2.37075	3.2177	4.08047	NA	4.08047	-0.489726
ENSG00000134668	SPOCD1	protein_coding	human	86.3724	104.523	48.1138	92.9453	90.1587	55.6121	132.225	156.097	58.0646	145.846	102.069	84.7657	140.573	97.6377	99.2487	1.79342	1.89547	0.735594	1.80894	1.67627	1.00668	0.0344189	-0.22058	0.272364	0.14014	-1.16255	-1.04462	-0.103392	-0.669685	-0.79564	0.233387	0.227916	0.301086	0.22295	0.234697	0.28024	0.169673	0.177941	0.272166	0.175108	0.225545	0.231316	0.172883	0.217167	0.206861	7.68434
ENSG00000203620	AL354919.1	lncRNA	human	0.136856	0.157235	0.12825	0.146382	0.300109	0.508128	0	0.155891	0.322484	0	0	0	0.145929	0.511395	0.36919	-0.703018	-1.09864	-0.50416	-0.89183	-0.0404762	1.27495	NA	1.0595	1.78241	NA	NA	NA	0.88249	1.31931	2.18154	4.08047	4.08047	4.08047	4.08047	3.49657	2.77862	NA	4.08047	3.34019	NA	NA	NA	4.08047	2.72456	3.25522	-0.172288
ENSG00000269967	AL136115.2	lncRNA	human	13.7408	16.8439	11.9165	14.1852	16.2708	13.4362	14.5969	20.0719	11.9625	17.104	15.0031	12.2673	17.1535	16.0453	14.1521	0.338036	0.47674	0.139441	0.249817	0.50919	0.395388	-0.0706919	0.0399205	0.255657	0.172686	-0.337153	-0.181295	0.29036	-0.111118	0.155911	0.525199	0.490753	0.564912	0.520466	0.479451	0.53633	0.502775	0.439145	0.556162	0.473622	0.516272	0.550612	0.46554	0.480611	0.520276	0.643635
ENSG00000184007	PTP4A2	protein_coding	human	9739.76	9545.72	7920.78	9831.91	9432.31	7952.94	10636.9	10172.6	7097.55	10439.3	8530.98	8643.77	10407.6	8441.46	8778.82	0.494592	0.078244	0.130134	0.353692	0.135943	0.0803256	-0.124011	0.0585336	-0.0503539	-0.380661	0.0533283	-0.347956	-0.186685	-0.0533661	-0.262824	0.0601214	0.0616326	0.0580259	0.05236	0.0723449	0.071607	0.0419455	0.0614357	0.0626059	0.0529602	0.0492395	0.0494471	0.0561838	0.0744952	0.0569993	8.22656
ENSG00000228634	AL136115.1	lncRNA	human	0.1497	0.172413	0.139937	0.15967	0.166899	0.142694	0	0	0	0	0	0	0	0	0	-0.703018	-1.09864	-0.50416	-0.89183	-1.00226	-0.569223	NA	NA	NA	NA	NA	NA	NA	NA	NA	4.08047	4.08047	4.08047	4.08047	4.08047	4.08047	NA	NA	NA	NA	NA	NA	NA	NA	NA	-0.172288
ENSG00000284702	AL136115.3	lncRNA	human	0	0	0	0	0	0	0	0	0	0	0	0	0	0	0	NA	NA	NA	NA	NA	NA	NA	NA	NA	NA	NA	NA	NA	NA	NA	NA	NA	NA	NA	NA	NA	NA	NA	NA	NA	NA	NA	NA	NA	NA	NA
ENSG00000121774	KHDRBS1	protein_coding	human	5540.57	6108.55	4889.93	5785.82	5862.1	4875.63	5785.46	6470.83	4303.95	6091.21	5391.46	4883.16	6113.51	5153.13	5084.27	0.2546	0.144363	0.0962347	0.195597	0.121111	0.0258037	-0.0418926	-0.0218614	-0.0706056	-0.0744214	-0.0467351	-0.141723	-0.0433418	-0.0928818	-0.158616	0.0509308	0.0527218	0.0505152	0.0454688	0.0526971	0.0722766	0.0401229	0.0461689	0.071559	0.0485999	0.047777	0.0467506	0.0416963	0.0698584	0.0675329	4.99893
ENSG00000203325	AL445248.1	lncRNA	human	0.343522	0	0.202873	0.370344	0.147916	0.165113	0.677803	0.155891	0.318907	0.356215	0.21295	0.478324	0.51748	0.296364	0.482779	2.05262	NA	1.41939	2.03239	0.921293	1.35433	-0.042006	1.0595	-0.0655588	-2.15552	1.55757	-0.623929	-1.06747	0.435329	-0.657862	3.58393	NA	4.08047	3.50447	4.08047	4.08047	2.56646	4.08047	3.40107	3.44055	4.08047	2.92289	2.8647	3.52995	2.99254	0.57273
ENSG00000121775	TMEM39B	protein_coding	human	334.908	350.274	296.569	363.844	353.775	301.512	367.83	377.467	271.07	356.16	315.967	300.627	388.893	322.999	331.036	0.298033	0.0492914	0.152577	0.345483	0.163716	0.136827	0.0649399	0.11518	-0.0170499	-0.212857	0.104645	-0.128534	-0.150289	-0.0254177	-0.198736	0.122855	0.115968	0.123769	0.114333	0.112521	0.135369	0.116329	0.108779	0.139571	0.118469	0.121147	0.128197	0.108352	0.128903	0.131425	2.42589
ENSG00000266203	MIR5585	miRNA	human	0.308617	0.157235	0.509968	0.146382	0.152193	0.328383	0.168454	0	0.499344	0.178107	0.400597	0.497054	0	0.198997	0.190834	0.258768	-1.09864	1.33323	-0.89183	-1.00226	0.392563	-1.13359	NA	-0.939527	-1.32153	2.4314	1.09185	NA	1.3971	1.29502	3.48065	4.08047	2.73068	4.08047	4.08047	3.47306	4.08047	NA	2.71914	4.08047	3.10356	2.70893	NA	4.08047	4.08047	0.0743447
ENSG00000276493	AL445248.2	misc_RNA	human	0	0	0	0	0	0	0	0	0	0	0	0	0	0	0	NA	NA	NA	NA	NA	NA	NA	NA	NA	NA	NA	NA	NA	NA	NA	NA	NA	NA	NA	NA	NA	NA	NA	NA	NA	NA	NA	NA	NA	NA	NA
ENSG00000025800	KPNA6	protein_coding	human	4300.94	4758.71	3934	4508.61	4585.6	4060.95	4383.09	4929.25	3593.44	4611.1	4220.41	3809.45	4660.56	4187.85	4113.17	0.168785	0.0661937	0.107276	0.119084	0.0533208	0.134359	-0.0320425	-0.011775	0.026352	-0.0663486	0.0421487	-0.044602	-0.0346588	0.0830314	0.0256558	0.0604997	0.0590947	0.056818	0.0537117	0.0597316	0.0680519	0.0463096	0.0465498	0.0592656	0.0523515	0.0472553	0.0509474	0.0445047	0.0590392	0.056559	2.78985
ENSG00000250135	AL049795.2	lncRNA	human	0	0	0	0	0	0	0	0	0	0	0	0	0	0	0	NA	NA	NA	NA	NA	NA	NA	NA	NA	NA	NA	NA	NA	NA	NA	NA	NA	NA	NA	NA	NA	NA	NA	NA	NA	NA	NA	NA	NA	NA	NA
ENSG00000084652	TXLNA	protein_coding	human	3755.31	4101.95	3237.63	4166.78	3965.16	3224.02	4313.23	4534.77	2918.79	4270.04	3706.65	3383.65	4564.7	3566.95	3736.78	0.385503	0.254503	0.170744	0.482348	0.252227	0.0986385	0.11397	-0.000800386	-0.0727987	-0.0957042	-0.0820249	-0.198056	-0.199036	-0.151358	-0.373317	0.056287	0.0677139	0.0586443	0.0534501	0.0645439	0.0693464	0.0401678	0.0600158	0.0614496	0.0566238	0.0589293	0.0468648	0.0484264	0.0643499	0.0564473	6.84888
ENSG00000160050	CCDC28B	protein_coding	human	28.4258	34.3651	34.6492	28.1517	34.5431	34.7369	19.6926	30.761	31.6011	24.8712	31.6982	26.3661	24.7532	31.7259	26.1415	-0.660904	-0.44056	0.180779	-0.932893	-0.338125	0.122154	-0.257758	0.104026	-0.0582122	0.251197	0.622635	0.859867	0.626875	0.462538	1.07042	0.391336	0.344981	0.330565	0.3905	0.329461	0.367985	0.465657	0.353801	0.371785	0.4122	0.350535	0.396164	0.401488	0.373819	0.436989	-1.68884
ENSG00000224066	AL049795.1	lncRNA	human	21.9757	25.8619	22.4494	21.2657	27.0325	20.1535	12.4262	20.6568	12.9468	16.0725	17.009	14.3488	16.3825	15.7023	10.9647	-0.978118	-0.860658	-0.635568	-1.44423	-0.584142	-1.1655	-0.449946	0.28285	-0.531938	0.150129	0.229685	0.360125	0.894035	-0.581331	0.290194	0.435347	0.401721	0.428127	0.457503	0.416497	0.474182	0.5344	0.454096	0.534127	0.467819	0.462193	0.496722	0.514351	0.529325	0.588331	-2.24676
ENSG00000160051	IQCC	protein_coding	human	80.709	101.871	74.4209	80.2699	104.143	76.9841	77.1377	123.003	67.6815	96.9966	89.4804	71.0704	99.7255	94.0317	73.1053	0.125743	0.371971	0.088981	-0.0748818	0.518765	0.122267	-0.183197	0.150101	0.0327531	0.282731	-0.281126	-0.0196691	0.624669	-0.393303	0.207685	0.234219	0.205734	0.232096	0.225502	0.20046	0.237151	0.227546	0.179428	0.236782	0.207946	0.208681	0.236594	0.196989	0.208062	0.233057	0.536862
ENSG00000222046	DCDC2B	protein_coding	human	0.623011	1.17815	0.95968	0.637607	0.6192	0.735938	0.363657	0.858692	0.773825	0.845808	1.18078	0.685864	0.331704	0.46373	0.483763	-1.14603	0.487995	0.488611	-1.33588	-1.44697	-0.250886	-0.171807	-1.94502	-0.73578	1.68285	-0.0031571	1.65636	-0.0792797	1.17941	1.07998	2.51605	1.77148	2.00842	2.51164	2.50914	2.40101	3.21152	2.13005	2.30298	2.10751	1.74707	2.41064	3.35797	3.00304	2.99475	-0.455489
ENSG00000160055	TMEM234	protein_coding	human	197.069	259.678	187.759	226.969	250.742	200.535	176.749	259.781	147.709	203.861	193.825	143.996	226.559	199.449	179.423	-0.475674	-0.0351963	-0.418793	-0.230823	-0.0508161	-0.278349	0.261273	-0.0166017	0.139472	0.47616	-0.383003	0.0736831	0.211314	-0.226378	-0.0377065	0.160299	0.143687	0.160363	0.147369	0.139462	0.16672	0.152834	0.128079	0.171216	0.147787	0.149188	0.168144	0.131988	0.150418	0.159587	-2.96742
ENSG00000084623	EIF3I	protein_coding	human	3659.27	3902.42	3060.59	3853.56	3793.95	3130.36	3807.61	4005.29	2582.02	3854.26	3227.35	3032.26	3945.27	3201.34	3256.7	0.219299	0.0126827	-0.0971752	0.182447	0.0267127	-0.0951818	-0.0196761	0.015487	0.00127994	-0.171224	-0.108511	-0.299796	-0.12465	-0.119727	-0.267273	0.0624154	0.0684719	0.0696516	0.0571686	0.0691253	0.0725232	0.0451881	0.0601864	0.0721443	0.0581362	0.065895	0.0610473	0.0520153	0.0673517	0.0579931	3.51354
ENSG00000220785	MTMR9LP	transcribed_unprocessed_pseudogene	human	41.2054	52.9346	46.9155	42.1177	52.7585	45.5477	18.1627	36.7836	29.0802	26.5105	33.5036	25.0361	26.996	31.9463	23.2206	-1.6069	-1.01008	-0.706704	-1.90536	-0.919325	-0.924809	-0.277128	0.0966247	-0.21813	0.623649	0.306679	0.9185	1.01549	-0.00119571	0.992847	0.372094	0.318894	0.31937	0.367884	0.320241	0.34076	0.480243	0.350985	0.361949	0.407019	0.344471	0.405708	0.409638	0.370962	0.431406	-4.31854
ENSG00000183615	FAM167B	protein_coding	human	12.156	17.9118	13.633	12.0836	18.2473	13.9562	5.91921	17.0377	9.58476	10.8829	12.5143	7.96795	11.2372	13.1579	7.9074	-1.33595	-0.299991	-0.571136	-1.75756	-0.175295	-0.555037	-0.399695	0.125805	0.0133329	1.06235	-0.26266	0.782225	1.61234	-0.377304	1.20625	0.578878	0.46998	0.531216	0.612175	0.457669	0.531415	0.781345	0.479824	0.613331	0.5981	0.554333	0.672817	0.624681	0.540554	0.716528	-2.30783
ENSG00000182866	LCK	protein_coding	human	0.696497	0.172413	0.320122	0.15967	0.314815	0.142694	0.530959	0.155891	0.15682	0.56673	0.18866	0.629963	0.145929	0.128999	0	1.74492	-1.09864	0.457627	-0.89183	-0.0404759	-0.569223	-2.61715	1.0595	-1.02734	-2.80849	1.55757	-1.27103	0.88249	-0.526457	NA	2.43487	4.08047	3.43938	4.08047	3.43689	4.08047	2.73108	4.08047	4.08047	2.66667	4.08047	2.47243	4.08047	4.08047	NA	0.716638
ENSG00000277617	AL121991.1	misc_RNA	human	0	0	0	0	0	0	0	0	0	0	0	0	0	0	0	NA	NA	NA	NA	NA	NA	NA	NA	NA	NA	NA	NA	NA	NA	NA	NA	NA	NA	NA	NA	NA	NA	NA	NA	NA	NA	NA	NA	NA	NA	NA
ENSG00000252450	AL109945.2	misc_RNA	human	0	0	0	0	0	0	0	0	0	0	0	0	0	0	0	NA	NA	NA	NA	NA	NA	NA	NA	NA	NA	NA	NA	NA	NA	NA	NA	NA	NA	NA	NA	NA	NA	NA	NA	NA	NA	NA	NA	NA	NA	NA
ENSG00000116478	HDAC1	protein_coding	human	1993.27	2092.05	1792.42	2067.11	2038.76	1860.07	1984.22	2046.63	1597.61	2003.67	1800.16	1714.05	2022.7	1817.02	1840.12	0.129751	-0.132475	0.0187324	0.0485061	-0.108665	0.0623984	-0.064344	0.0256127	0.0433102	-0.227147	0.152659	-0.0943248	-0.125725	0.173371	0.024695	0.0597299	0.0677394	0.0654711	0.0576964	0.0653653	0.0759495	0.0503077	0.062922	0.0761031	0.0604388	0.0660856	0.0591187	0.0551843	0.073524	0.0692116	2.17229
ENSG00000175130	MARCKSL1	protein_coding	human	2157.95	2507.69	1973.09	2245.39	2430.16	2096.27	1971.39	2477.8	1675.38	2197.22	2006.59	1725.48	2213.93	2063.25	1904.65	-0.121526	-0.0870022	-0.191306	-0.199809	-0.0821729	-0.0746083	-0.0609538	0.00671552	0.1154	0.070122	-0.102947	-0.0531693	0.148998	0.00924277	0.134943	0.0688527	0.0725396	0.0733962	0.06491	0.0708183	0.0862367	0.0521639	0.0585947	0.0814746	0.0608434	0.0658487	0.0633102	0.053139	0.0761912	0.0731196	-1.76501
ENSG00000233775	AL109945.1	lncRNA	human	0.932229	2.61887	2.06244	1.32069	1.72917	1.66195	0.300881	2.30825	1.69531	1.43461	2.57412	1.09519	1.01457	1.38752	1.03366	-3.21202	0.452977	0.454778	-1.56811	-0.599536	-0.206496	1.63829	-1.06155	-0.662475	3.7327	0.00699516	3.68095	1.01645	0.389288	1.37385	2.13648	1.26341	1.33536	1.77302	1.51592	1.49399	3.3856	1.40921	1.45459	1.88249	1.25315	2.01561	2.01394	1.67106	1.93737	-1.50342
ENSG00000162526	TSSK3	protein_coding	human	12.478	17.7841	15.0164	16.2212	20.332	15.458	10.6141	19.7829	12.5319	11.7049	14.4124	9.99455	18.0694	17.049	13.4906	-1.03985	-0.206578	-0.14117	-0.326624	0.225725	-0.127734	0.730464	0.424254	0.014283	0.858767	0.0687881	0.914675	0.584752	-0.350145	0.210451	0.595215	0.492668	0.518287	0.507263	0.440376	0.515667	0.613068	0.444596	0.537968	0.594367	0.521091	0.626356	0.458371	0.46597	0.534762	-1.74702
ENSG00000225828	FAM229A	protein_coding	human	115.799	130.665	100.286	124.913	140.933	99.1183	96.3816	124.1	62.3143	99.8625	84.9793	75.6492	118.749	92.9933	80.099	-0.466695	-0.512465	-0.749743	-0.43577	-0.173662	-0.891795	0.0468471	0.333736	-0.143296	-0.00733442	-0.237253	-0.266531	0.292727	-0.716567	-0.446532	0.225534	0.219484	0.240088	0.224248	0.208688	0.26051	0.207915	0.187061	0.263142	0.201866	0.22039	0.226271	0.192409	0.228298	0.247563	-2.06929
ENSG00000160058	BSDC1	protein_coding	human	867.503	1087.59	824.587	947.144	1043.76	840.715	790.464	1096.11	663.341	910.649	864.377	684.81	953.031	843.143	761.478	-0.268719	0.00444883	-0.217725	-0.197301	-0.0270788	-0.22684	0.088451	-0.0306048	-0.0095074	0.308663	-0.220781	0.0677162	0.201344	-0.197552	-0.018737	0.0794405	0.0789417	0.0780909	0.0716178	0.0739638	0.0871993	0.0758439	0.0768924	0.0911139	0.0821155	0.081947	0.0831163	0.0708749	0.0861227	0.0854129	-3.38264
ENSG00000224333	GAPDHP20	processed_pseudogene	human	0	0	0	0	0	0	0	0	0	0	0	0	0	0	0	NA	NA	NA	NA	NA	NA	NA	NA	NA	NA	NA	NA	NA	NA	NA	NA	NA	NA	NA	NA	NA	NA	NA	NA	NA	NA	NA	NA	NA	NA	NA
ENSG00000270850	AL356986.1	processed_pseudogene	human	0.171761	0	0	0	0	0	0.168454	0	0	0.178107	0	0.146035	0	0	0	1.22054	NA	NA	NA	NA	NA	-1.13359	NA	NA	-1.32153	NA	-0.746246	NA	NA	NA	4.08047	NA	NA	NA	NA	NA	4.08047	NA	NA	4.08047	NA	4.08047	NA	NA	NA	0.299116
ENSG00000229259	LRRC37A12P	unprocessed_pseudogene	human	0	0	0	0	0	0	0	0	0	0	0	0	0	0	0	NA	NA	NA	NA	NA	NA	NA	NA	NA	NA	NA	NA	NA	NA	NA	NA	NA	NA	NA	NA	NA	NA	NA	NA	NA	NA	NA	NA	NA	NA	NA
ENSG00000263529	RN7SL122P	misc_RNA	human	0	0	0	0	0	0	0	0	0	0	0	0	0	0	0	NA	NA	NA	NA	NA	NA	NA	NA	NA	NA	NA	NA	NA	NA	NA	NA	NA	NA	NA	NA	NA	NA	NA	NA	NA	NA	NA	NA	NA	NA	NA
ENSG00000254553	AL033529.1	protein_coding	human	0	0	0	0	0	0	0	0	0	0	0	0	0	0	0	NA	NA	NA	NA	NA	NA	NA	NA	NA	NA	NA	NA	NA	NA	NA	NA	NA	NA	NA	NA	NA	NA	NA	NA	NA	NA	NA	NA	NA	NA	NA
ENSG00000273274	ZBTB8B	protein_coding	human	1.65349	4.32062	2.14788	1.73637	2.73159	2.33876	0.363657	3.87434	1.50149	2.65923	3.09458	0.893184	1.29005	1.93942	1.08981	-2.87925	0.683821	-0.769703	-3.06689	-0.486231	-0.52339	-0.171807	-1.1581	0.241186	3.58489	-1.44503	2.12403	2.59742	-0.0304195	2.54944	1.80519	1.04264	1.43308	1.79293	1.21098	1.32201	3.21152	1.06626	1.5832	1.59372	1.26175	2.2208	1.88567	1.36251	2.01333	-1.59499
ENSG00000160062	ZBTB8A	protein_coding	human	143.576	157.747	119.31	159.257	144.384	121.677	165.097	167.081	106.595	164.372	138.066	125.476	167.692	128.788	141.577	0.384484	0.282229	0.0733109	0.480834	0.119336	0.0633275	0.114881	-0.163214	-0.010063	-0.0647798	-0.208436	-0.294507	-0.330589	-0.0550419	-0.407806	0.178636	0.171519	0.18789	0.166634	0.173458	0.199293	0.159917	0.160611	0.201417	0.163855	0.174382	0.181916	0.157166	0.188079	0.182714	2.15233
ENSG00000176261	ZBTB8OS	protein_coding	human	430.785	441.979	344.834	431.573	430.532	357.664	427.029	435.99	280.475	436.72	347.961	341.977	425.486	351.016	352.766	0.212788	-0.104251	-0.240135	0.0381944	-0.0851533	-0.191237	-0.157429	0.0202559	0.0478282	-0.281155	-0.134562	-0.436442	-0.0922198	-0.103565	-0.218677	0.0991157	0.101258	0.112793	0.100563	0.103697	0.11801	0.0965754	0.101436	0.128216	0.0969594	0.111563	0.109559	0.101739	0.118565	0.116955	2.14686
ENSG00000200591	AC114489.1	misc_RNA	human	0	0	0	0	0	0	0	0	0	0	0	0	0	0	0	NA	NA	NA	NA	NA	NA	NA	NA	NA	NA	NA	NA	NA	NA	NA	NA	NA	NA	NA	NA	NA	NA	NA	NA	NA	NA	NA	NA	NA	NA	NA
ENSG00000162521	RBBP4	protein_coding	human	4380.16	4644.46	3788.61	4549.36	4470.72	3872.33	4493.55	4686.7	3301.58	4582.56	3965.48	3738.97	4583.03	3891.88	3959.8	0.215547	-0.00701423	-0.00216741	0.140522	-0.0221979	-0.0027321	-0.0582097	-0.0137137	-0.000998408	-0.18695	0.00627416	-0.200988	-0.131524	0.0217276	-0.132754	0.0515749	0.0560364	0.0545252	0.0520305	0.0568287	0.0649807	0.0438817	0.0487939	0.0614055	0.0474956	0.0502217	0.0462331	0.0483011	0.0607458	0.0595866	4.1793
ENSG00000162520	SYNC	protein_coding	human	253.265	335.738	213.676	259.776	331.054	213.418	250.143	407.554	171.709	320.023	274.372	205.451	325.798	270.943	209.55	0.135208	0.516248	-0.162396	0.025497	0.554053	-0.234716	-0.0925503	0.0373028	-0.0731121	0.418313	-0.677945	-0.281176	0.559601	-0.786736	-0.249905	0.129989	0.127217	0.141788	0.132731	0.125966	0.14999	0.125507	0.116325	0.154502	0.119886	0.131702	0.135742	0.121363	0.137632	0.147197	1.04015
ENSG00000224409	AC114489.2	lncRNA	human	12.4464	14.0363	12.2135	13.07	13.8463	13.6566	6.71538	7.99236	7.74049	7.16606	7.30074	6.5491	7.43455	8.61517	8.07674	-1.32162	-1.35926	-1.10539	-1.42328	-1.30748	-0.760562	-0.0848478	0.0657878	0.351482	-0.0256317	0.274523	0.235893	0.139623	0.564182	0.680078	0.624248	0.554038	0.576563	0.561908	0.558287	0.563788	0.777208	0.713922	0.704152	0.773766	0.718161	0.791897	0.714931	0.701148	0.70136	-2.11714
ENSG00000162522	KIAA1522	protein_coding	human	4273.76	5189.85	3936.86	4590.25	5015.13	3980.35	4301.97	5664.06	3418.46	4842.43	4461.43	3675.48	5021.99	4351.43	3981.31	0.061819	0.215963	0.0180316	0.0788679	0.211666	-0.013695	0.0341245	-0.00295087	-0.0326389	0.190027	-0.196673	-0.0270741	0.164082	-0.223284	-0.0823095	0.0505657	0.0533504	0.0531496	0.04725	0.052809	0.0666496	0.0406634	0.0458164	0.0647085	0.0469376	0.0500358	0.0480463	0.0423226	0.0620154	0.0591648	1.22255
ENSG00000134684	YARS1	protein_coding	human	3229.03	3528.15	2957.95	3444.16	3491.79	3155.64	3246.04	3587.56	2709.96	3314	3035.47	2777.27	3496.23	3196.28	3149.3	0.0785469	-0.066397	0.0187907	0.0760025	0.000509546	0.139106	0.0143317	0.0674692	0.119941	-0.109467	0.0866489	-0.0430343	-0.044489	0.141211	0.074031	0.052045	0.066952	0.0573112	0.0496541	0.0702329	0.0660965	0.0434247	0.071621	0.067463	0.0610652	0.0656691	0.0520493	0.0608175	0.0760091	0.0605636	1.50921
ENSG00000116497	S100PBP	protein_coding	human	815.605	1132.52	874.728	856.912	1084.44	912.969	692.274	1226.54	798.282	936.483	990.876	717.81	941.711	986.805	787.468	-0.340982	0.217498	0.0733986	-0.392972	0.189952	0.130096	-0.0348584	-0.0262515	0.0564591	0.594111	-0.14287	0.431071	0.613779	-0.0575773	0.533779	0.0790718	0.0743988	0.0816804	0.0854215	0.076418	0.085409	0.0857072	0.0680328	0.0879584	0.072714	0.0758737	0.081587	0.0812476	0.0811702	0.0931001	-4.31231
ENSG00000160097	FNDC5	protein_coding	human	5.09753	6.07578	7.34933	4.90792	4.9792	4.89779	5.03023	6.08408	6.86938	6.12288	8.427	7.18843	4.89224	4.88341	4.80276	0.323378	0.39721	1.29774	0.040739	-0.0471673	0.307042	-0.267139	-0.443835	-0.992628	0.107832	0.903717	0.985883	-0.05733	0.357386	0.278531	0.854753	0.797003	0.721393	0.864655	0.841494	0.8735	0.857801	0.789149	0.741312	0.790007	0.676232	0.728179	0.856559	0.862715	0.887444	0.378329
ENSG00000121905	HPCA	protein_coding	human	3.39581	3.38618	3.47555	3.43947	4.16478	3.75527	2.40362	2.96415	2.84371	2.28925	2.45853	2.52386	3.05128	3.40585	2.7849	-0.692066	-1.34163	-0.343118	-0.890292	-0.296214	-0.200142	-0.180858	1.03115	0.147047	-0.60127	0.983772	0.360065	0.618441	0.104752	0.703917	1.06403	1.09605	1.03496	1.06462	0.96444	1.00335	1.24183	1.18216	1.13201	1.27579	1.24749	1.21035	1.1472	1.07549	1.17928	-0.650421
ENSG00000121900	TMEM54	protein_coding	human	429.297	485.028	402.443	445.688	462.357	428.984	395.938	462.342	356.09	429.304	402.504	356.487	423.833	408.916	394.21	-0.0891771	-0.130038	-0.080974	-0.17214	-0.182852	0.0398044	-0.0659346	-0.0534322	0.119892	-0.00340519	0.0491253	0.0250833	0.0208543	0.22442	0.222111	0.111035	0.111119	0.113442	0.112194	0.10834	0.121252	0.105002	0.100445	0.117078	0.103323	0.10719	0.107757	0.102939	0.111575	0.117413	-0.803147
ENSG00000287691	AL031602.2	lncRNA	human	0	0	0	0	0	0	0	0	0	0	0	0	0	0	0	NA	NA	NA	NA	NA	NA	NA	NA	NA	NA	NA	NA	NA	NA	NA	NA	NA	NA	NA	NA	NA	NA	NA	NA	NA	NA	NA	NA	NA	NA	NA
ENSG00000116514	RNF19B	protein_coding	human	783.737	907.238	705.227	799.461	897.879	745.858	889.582	1136.9	742.213	996.569	902.528	780.546	1011.51	933.156	841.561	0.59545	0.613527	0.502068	0.482969	0.667269	0.583399	-0.0958028	0.0544227	0.0806664	0.0536338	-0.110182	-0.0767391	0.215101	-0.0814981	0.110309	0.0800243	0.0795339	0.0852572	0.0839545	0.0877957	0.096265	0.0759134	0.0775611	0.094014	0.0720791	0.0772385	0.0782213	0.0831451	0.095306	0.093402	7.44087
ENSG00000278966	AL031602.1	TEC	human	0	0	0	0.171638	0	0	0.15897	0	0	0	0	0	0.173057	0	0.149187	NA	NA	NA	1.03172	NA	NA	0.789963	NA	NA	NA	NA	NA	-1.04106	NA	-0.628535	NA	NA	NA	4.08047	NA	NA	4.08047	NA	NA	NA	NA	NA	4.08047	NA	4.08047	NA
ENSG00000217644	AL355864.1	processed_pseudogene	human	0	0	0	0	0	0	0	0	0	0	0	0	0	0	0	NA	NA	NA	NA	NA	NA	NA	NA	NA	NA	NA	NA	NA	NA	NA	NA	NA	NA	NA	NA	NA	NA	NA	NA	NA	NA	NA	NA	NA	NA	NA
ENSG00000239670	AL355864.2	unprocessed_pseudogene	human	0	0	0	0	0	0	0	0	0	0	0	0	0	0	0	NA	NA	NA	NA	NA	NA	NA	NA	NA	NA	NA	NA	NA	NA	NA	NA	NA	NA	NA	NA	NA	NA	NA	NA	NA	NA	NA	NA	NA	NA	NA
ENSG00000236065	AL020995.1	lncRNA	human	0	0	0	0	0	0	0	0	0	0	0	0	0	0	0	NA	NA	NA	NA	NA	NA	NA	NA	NA	NA	NA	NA	NA	NA	NA	NA	NA	NA	NA	NA	NA	NA	NA	NA	NA	NA	NA	NA	NA	NA	NA
ENSG00000004455	AK2	protein_coding	human	3327.52	3360.48	2583.03	3473.34	3312.71	2670.1	3606.39	3512.47	2166.33	3515.56	2736.75	2723.76	3612.13	2783.26	2926.02	0.374264	0.0261808	-0.143534	0.316278	0.0792004	-0.109858	-0.0411977	0.054125	0.0331779	-0.31259	-0.168148	-0.501278	-0.205936	-0.186723	-0.41545	0.0597713	0.0637385	0.0598924	0.0532706	0.0673344	0.0696042	0.0469388	0.0612201	0.0653222	0.0579881	0.0579559	0.0547993	0.0543271	0.0702809	0.0591498	6.26161
ENSG00000276645	AL020995.2	misc_RNA	human	1.43375	1.23733	2.22373	3.15247	1.43733	2.02936	2.90225	1.095	2.50341	1.12649	1.98261	2.03506	3.03012	1.92047	3.38715	-0.0195211	-1.18422	1.17914	1.60019	-0.328768	0.933322	1.64664	0.876058	-0.248932	-1.15597	2.46618	1.22122	-1.90624	1.26818	-0.665365	1.63905	1.91909	1.35344	1.18742	1.63133	1.52381	1.18025	1.87851	1.24433	1.84121	1.54984	1.33795	1.17895	1.47019	1.11011	-0.01191
ENSG00000142920	AZIN2	protein_coding	human	28.0556	40.6769	30.8232	31.9884	43.0632	33.1164	21.672	44.6983	25.8293	29.036	31.8569	21.476	35.6668	36.2876	26.6955	-0.831438	-0.0304923	-0.257256	-0.582206	0.208212	-0.119686	0.266607	0.2386	0.140249	0.835801	-0.223814	0.590113	0.821893	-0.326984	0.474287	0.37333	0.312157	0.370454	0.348811	0.296483	0.350639	0.404476	0.289952	0.397965	0.36093	0.361977	0.427425	0.324759	0.326486	0.381365	-2.22709
ENSG00000278997	AL662907.1	TEC	human	3.32175	4.30234	2.58026	2.93293	4.85573	3.98973	3.02878	6.00899	3.2287	4.30478	3.46767	2.65529	4.51299	5.39513	3.6758	0.28811	0.577897	-0.244031	-0.24106	0.952747	0.825265	-0.510904	0.383048	1.0724	0.32865	-0.827861	-0.517144	1.22703	-0.132474	1.07724	1.04268	0.930364	1.19054	1.10233	0.882855	0.998063	1.07388	0.780791	1.11093	0.909387	1.05482	1.16996	0.92431	0.848769	1.03802	0.276316
ENSG00000116525	TRIM62	protein_coding	human	133.163	176.042	140.884	139.625	175.922	139.616	110.668	187.547	118.848	142.457	150.09	113.612	150.005	148.466	117.104	-0.388624	0.0526823	-0.0104279	-0.451254	0.13102	-0.101686	-0.0457792	0.07795	-0.0916569	0.476984	-0.0616211	0.395141	0.613696	-0.230738	0.360208	0.173753	0.158844	0.171646	0.169431	0.153879	0.1755	0.180559	0.149493	0.183251	0.167665	0.167645	0.183468	0.160327	0.166138	0.183492	-2.23664
ENSG00000279179	AL662907.2	TEC	human	1.74568	1.89833	1.70613	1.6055	1.8109	1.54027	0.83184	1.03361	0.843794	1.04832	1.05876	1.00205	0.799566	0.815367	0.664468	-1.14148	-1.52289	-0.945376	-1.94352	-1.46573	-1.57238	-0.792662	0.0179124	-0.627636	-0.311697	0.548317	0.211974	0.514393	-0.0926727	0.401031	1.50727	1.49408	1.47391	1.64919	1.48927	1.72985	2.12386	1.96605	2.13093	1.9281	1.87177	1.87604	2.16765	2.27991	2.51064	-0.757317
ENSG00000284721	AL662907.3	lncRNA	human	0	0	0	0	0	0	0	0	0	0	0	0	0	0	0	NA	NA	NA	NA	NA	NA	NA	NA	NA	NA	NA	NA	NA	NA	NA	NA	NA	NA	NA	NA	NA	NA	NA	NA	NA	NA	NA	NA	NA	NA	NA
ENSG00000160094	ZNF362	protein_coding	human	514.657	573.662	470.704	535.977	575.173	484.667	468.996	559.681	385.338	499.723	456.272	410.248	522.391	471.187	438.256	-0.131187	-0.21221	-0.200207	-0.206366	-0.1126	-0.17578	-0.05793	0.0999586	0.0237268	-0.0449491	0.0139968	-0.0523405	0.124949	-0.0608032	0.0411244	0.0952213	0.102956	0.101203	0.092053	0.0938883	0.105484	0.0926278	0.100874	0.112782	0.102767	0.109759	0.103127	0.091574	0.104412	0.10474	-1.3777
ENSG00000270115	AL513327.3	lncRNA	human	10.3377	12.3577	11.9459	12.8517	14.3802	10.0064	8.64931	11.8667	7.8853	7.92517	9.78694	8.17125	12.3958	9.53344	8.3016	-0.927302	-0.778842	-0.185373	-0.364573	-0.157763	-0.879643	0.578962	0.624178	-0.69401	0.184836	0.59541	0.759002	0.238241	-0.721348	-0.50312	0.657335	0.597496	0.601778	0.595943	0.566554	0.677667	0.662999	0.578108	0.684126	0.669112	0.609444	0.670381	0.575222	0.656177	0.691857	-1.4107
ENSG00000184389	A3GALT2	protein_coding	human	0.286556	0.94386	1.05565	1.7426	0.86565	0.471077	1.32357	1.20223	0.854602	0.569285	1.35113	0.723526	1.9833	0.677124	1.43722	-1.53304	0.75957	1.50877	2.16559	0.703335	-0.445827	3.74914	-0.0567379	-1.97413	2.39561	0.798408	3.08563	-1.46743	-1.17242	-2.62604	3.53108	2.11727	1.91459	1.69137	2.25651	2.84592	1.94592	1.99485	2.13979	2.67944	1.71292	2.31052	1.58814	2.62674	1.90428	-0.434157
ENSG00000225313	AL513327.1	lncRNA	human	0	0.214529	0.58593	0.541982	0.650931	0.376619	0.499865	0.89609	0.834561	0.198177	0.797732	0.537693	1.18308	0.945918	0.839573	NA	0.941774	2.90412	2.58554	2.81065	2.23649	2.34295	1.90569	-0.664925	0.720002	2.01156	2.66044	0.265061	-0.564303	-0.323033	NA	4.06594	2.70276	2.791	2.79348	3.25941	2.79023	2.37941	2.13945	4.06582	2.31937	2.73393	1.9675	2.19261	2.17402	NA
ENSG00000134686	PHC2	protein_coding	human	1419.66	1680.14	1391.05	1503.26	1584.04	1414.35	1668.29	2059.51	1502.8	1845.57	1791.57	1523.6	1852.53	1723.79	1640.01	0.607793	0.678264	0.717379	0.588452	0.617178	0.703751	-0.00223662	-0.0597852	-0.0147534	0.105692	0.0407913	0.12637	0.0596783	0.0887015	0.125287	0.0667345	0.0789621	0.0671485	0.0655552	0.0742123	0.0869639	0.0560131	0.0738469	0.0804976	0.0701469	0.0712432	0.0588941	0.0632921	0.0845527	0.0790342	9.10763
ENSG00000284154	MIR3605	miRNA	human	4.18932	5.53614	4.2096	4.2259	5.51392	4.6739	2.69146	5.13113	3.26035	3.80372	3.85378	2.81533	3.83873	4.32172	3.21886	-0.856091	-0.394336	-0.540708	-1.07235	-0.242748	-0.281382	-0.200895	0.157726	0.258896	0.503796	-0.153911	0.3254	0.859271	-0.0359795	0.801048	1.01398	0.886821	1.01485	0.996792	0.861107	0.940104	1.14791	0.873214	1.06835	1.01208	1.02284	1.16584	0.986106	0.922367	1.06619	-0.844289
ENSG00000222112	RN7SKP16	misc_RNA	human	8.84477	15.3522	11.8326	15.2285	14.4367	13.8981	11.3542	17.309	12.7589	11.2484	14.203	8.51901	17.0161	15.4799	16.0494	-0.907174	0.447661	0.253833	0.564274	0.315131	0.601248	1.48644	-0.134882	0.347371	1.38309	-0.192613	1.17726	-0.219528	0.289607	0.0479213	0.661398	0.532698	0.56039	0.501852	0.52311	0.530121	0.591297	0.503841	0.530273	0.620616	0.537381	0.658141	0.47473	0.501266	0.482524	-1.3716
ENSG00000233246	AL513327.2	lncRNA	human	5.24006	5.85309	5.629	4.64958	7.04835	6.69021	4.18427	7.14691	6.27914	5.2631	5.69097	5.08611	5.85602	7.76809	5.6228	-0.0627017	-0.0592562	0.321955	-0.640386	0.453406	0.696916	-0.559423	0.495894	0.375851	0.0426317	0.379301	0.403313	1.12626	0.24302	1.34623	0.883062	0.8521	0.858701	0.94735	0.743699	0.785195	0.959365	0.736368	0.781129	0.861328	0.846971	0.878226	0.820482	0.683124	0.857997	-0.0710048
ENSG00000234512	TLR12P	unitary_pseudogene	human	0	0	0	0	0	0	0	0	0	0	0	0	0	0	0	NA	NA	NA	NA	NA	NA	NA	NA	NA	NA	NA	NA	NA	NA	NA	NA	NA	NA	NA	NA	NA	NA	NA	NA	NA	NA	NA	NA	NA	NA	NA
ENSG00000121903	ZSCAN20	protein_coding	human	131.779	213.73	185.392	144.187	209.399	180.831	90.5512	233.756	173.702	151.271	205.973	133.258	162.24	196.728	139.459	-0.970024	0.178929	0.346296	-0.867875	0.21519	0.222148	0.119234	0.0379481	-0.124997	1.18526	0.168464	1.33318	1.11424	0.00897865	1.1006	0.176599	0.139151	0.148422	0.168738	0.143802	0.155147	0.204264	0.137726	0.157198	0.166623	0.141962	0.17742	0.166188	0.153838	0.177571	-5.4928
ENSG00000235907	AC115285.1	processed_pseudogene	human	0	0	0	0	0	0	0	0	0	0	0	0	0	0	0	NA	NA	NA	NA	NA	NA	NA	NA	NA	NA	NA	NA	NA	NA	NA	NA	NA	NA	NA	NA	NA	NA	NA	NA	NA	NA	NA	NA	NA	NA	NA
ENSG00000121904	CSMD2	protein_coding	human	0.838582	0.833753	0.139937	1.16751	0.349085	0.913062	1.60542	0.865741	0.656125	1.32624	0.565081	0.585875	1.19378	0.939766	1.62624	2.09937	1.91036	-0.50416	2.53886	-0.0404753	2.30052	0.441235	-1.95559	2.80364	-0.121017	-2.3874	-2.58275	-2.54926	2.3422	-0.23458	2.28893	2.29178	4.08047	1.95814	3.31332	2.15206	1.52214	2.23892	2.39177	1.71358	2.68262	2.64067	1.92668	2.10543	1.49108	0.917183
ENSG00000227000	HSPD1P14	processed_pseudogene	human	0	0	0	0	0	0	0	0	0	0	0	0	0	0	0	NA	NA	NA	NA	NA	NA	NA	NA	NA	NA	NA	NA	NA	NA	NA	NA	NA	NA	NA	NA	NA	NA	NA	NA	NA	NA	NA	NA	NA	NA	NA
ENSG00000176256	HMGB4	protein_coding	human	0	0	0	0	0	0	0	0	0	0	0	0	0	0	0	NA	NA	NA	NA	NA	NA	NA	NA	NA	NA	NA	NA	NA	NA	NA	NA	NA	NA	NA	NA	NA	NA	NA	NA	NA	NA	NA	NA	NA	NA	NA
ENSG00000231163	CSMD2-AS1	lncRNA	human	0	0	0	0	0	0	0	0	0	0	0	0	0	0	0	NA	NA	NA	NA	NA	NA	NA	NA	NA	NA	NA	NA	NA	NA	NA	NA	NA	NA	NA	NA	NA	NA	NA	NA	NA	NA	NA	NA	NA	NA	NA
ENSG00000201148	RNA5SP42	rRNA_pseudogene	human	0	0	0	0	0	0	0	0	0	0	0	0	0	0	0	NA	NA	NA	NA	NA	NA	NA	NA	NA	NA	NA	NA	NA	NA	NA	NA	NA	NA	NA	NA	NA	NA	NA	NA	NA	NA	NA	NA	NA	NA	NA
ENSG00000142698	C1orf94	protein_coding	human	0.171761	0	0.202873	0	0.344919	0	0.168454	0.36227	0.177629	0.178107	0.21295	0.332288	0.340086	0.300256	0	1.22054	NA	1.41939	NA	1.87764	NA	-1.13359	2.01413	-1.02734	-1.32153	1.55757	0.21554	1.83874	-1.48386	NA	4.08047	NA	4.08047	NA	3.27836	NA	4.08047	3.22271	4.08047	4.08047	4.08047	3.33208	3.27965	3.4673	NA	0.299116
ENSG00000270241	AC115286.1	processed_pseudogene	human	0	0	0	0	0	0	0	0	0	0	0	0	0	0	0	NA	NA	NA	NA	NA	NA	NA	NA	NA	NA	NA	NA	NA	NA	NA	NA	NA	NA	NA	NA	NA	NA	NA	NA	NA	NA	NA	NA	NA	NA	NA
ENSG00000287703	AC099565.1	lncRNA	human	0	0	0	0	0	0.361988	0	0	0.308099	0	0	0	0	0.366363	0.352416	NA	NA	NA	NA	NA	2.19249	NA	NA	1.73095	NA	NA	NA	NA	2.23423	2.12988	NA	NA	NA	NA	NA	3.30694	NA	NA	3.39699	NA	NA	NA	NA	3.22478	3.311	NA
ENSG00000207941	MIR552	miRNA	human	0	0	0	0	0	0	0	0	0	0	0	0	0	0	0	NA	NA	NA	NA	NA	NA	NA	NA	NA	NA	NA	NA	NA	NA	NA	NA	NA	NA	NA	NA	NA	NA	NA	NA	NA	NA	NA	NA	NA	NA	NA
ENSG00000163866	SMIM12	protein_coding	human	693.537	786.299	582.077	726.35	766.596	598.308	787.957	940.041	553.669	848.686	723.712	637.545	868.053	722.434	685.104	0.522933	0.48679	0.246775	0.474451	0.509302	0.261793	-0.0318399	0.0244074	0.0149015	-0.000919635	-0.238648	-0.259549	0.0661504	-0.244839	-0.201765	0.0855086	0.0854248	0.0912348	0.0809568	0.0842463	0.0985775	0.0753653	0.0767951	0.0991744	0.0799768	0.0852137	0.0860559	0.0741082	0.0913097	0.0902489	6.11556
ENSG00000189280	GJB5	protein_coding	human	1.5075	2.47245	1.79035	2.63292	2.42166	1.85153	1.28156	1.94078	0.959763	1.04556	1.36767	0.641595	2.13561	1.39764	1.60742	-2.78331	-0.53929	-1.16121	-0.261114	-0.64569	-1.17102	2.54649	-0.0848558	0.0111122	2.20104	-0.565381	1.60853	-0.356527	-0.51636	-0.903083	1.78858	1.27948	1.55974	1.16495	1.23237	1.45573	1.85159	1.44129	2.00832	2.0881	1.84858	2.62699	1.29857	1.61267	1.52287	-1.55615
ENSG00000189433	GJB4	protein_coding	human	2.03407	2.60561	1.29946	2.12215	1.91049	0.907237	2.48119	2.92428	0.693932	2.96004	2.13286	1.65455	2.40413	1.14425	1.34486	0.777314	1.06043	-0.227727	0.743397	0.40862	-1.80306	-0.0121073	-0.646931	-1.58476	0.327545	-1.28782	-0.994323	-0.299831	-2.20573	-2.5376	1.34116	1.22875	1.7807	1.30611	1.38713	2.1207	1.18851	1.16332	2.57866	1.11441	1.48346	1.6131	1.23829	1.98047	1.86389	0.579582
ENSG00000255811	AL121988.1	lncRNA	human	0.629761	0.615963	0.629551	0.486966	1.17728	0.601274	0.168875	0.795459	0.318907	0.26542	0.29182	0.334023	0.659321	0.749383	0.161583	-1.22457	-1.6661	-1.02565	-2.37588	0.39579	-1.09083	-1.13359	2.05941	-0.0655588	-0.41623	0.65142	0.21554	2.80333	-1.48368	1.29502	2.37962	2.39757	2.38207	2.70374	1.78749	2.44853	4.08047	2.30143	3.40107	3.57404	3.5168	3.32598	2.56013	2.36737	4.08047	-0.514607
ENSG00000188910	GJB3	protein_coding	human	44.6486	61.8016	26.1126	46.0467	58.7361	31.7288	64.3222	98.7689	31.8262	80.2654	58.5163	43.0606	80.2209	61.9257	50.4129	1.60502	1.94919	0.616782	1.54131	1.92019	1.00223	-0.045226	-0.0244465	0.382522	0.378869	-1.32761	-0.969428	0.409604	-0.919011	-0.531167	0.331137	0.293537	0.40628	0.320944	0.293564	0.381453	0.24274	0.196969	0.350733	0.222447	0.274456	0.309628	0.21562	0.260138	0.28359	4.847
ENSG00000187513	GJA4	protein_coding	human	0	0.214529	0	0	0	0	0	0.217613	0	0.198177	0.183172	0	0	0	0	NA	0.941774	NA	NA	NA	NA	NA	-0.980163	NA	0.720002	-0.482655	NA	NA	NA	NA	NA	4.06594	NA	NA	NA	NA	NA	4.06602	NA	4.06582	4.06596	NA	NA	NA	NA	NA
ENSG00000230163	AL122010.1	lncRNA	human	0	0	0	0.171638	0	0	0.15897	0	0	0	0	0	0.173057	0	0.149187	NA	NA	NA	1.03172	NA	NA	0.789963	NA	NA	NA	NA	NA	-1.04106	NA	-0.628535	NA	NA	NA	4.08047	NA	NA	4.08047	NA	NA	NA	NA	NA	4.08047	NA	4.08047	NA
ENSG00000116544	DLGAP3	protein_coding	human	6.41903	5.61735	6.0177	6.74733	6.41192	7.33916	6.79735	5.6814	6.79172	5.75863	5.42351	6.02649	6.81541	7.41537	7.64404	0.272329	-0.497915	0.290991	0.254823	0.00199871	0.722936	0.000495239	0.500196	0.433074	-0.734629	0.78821	0.0355111	-0.220253	0.722761	0.48081	0.778114	0.84448	0.776238	0.746469	0.765756	0.755185	0.747815	0.843125	0.757893	0.83669	0.844071	0.784753	0.745368	0.751858	0.737314	0.349987
ENSG00000284773	AC114490.3	protein_coding	human	5.6274	6.96184	5.26353	6.19738	9.03907	7.61747	3.08823	6.91909	4.32677	3.58593	3.34957	2.54516	6.16552	7.57286	5.10691	-1.50504	-1.11907	-1.50069	-1.29019	-0.0659663	-0.133574	0.219479	1.0584	1.37014	0.42041	-0.379644	0.019816	1.25872	-0.0678606	1.17266	0.878611	0.771208	0.942477	0.842481	0.648518	0.729309	1.10154	0.750607	0.997654	1.01097	1.09721	1.22268	0.82014	0.705944	0.908701	-1.71298
ENSG00000241014	AC114490.1	transcribed_unitary_pseudogene	human	2.20491	3.4275	3.71529	2.46605	3.02379	3.38251	1.11902	2.72092	3.36952	1.9156	3.51513	2.4031	1.79884	2.7908	2.29881	-1.65957	-0.378517	0.446268	-1.41745	-0.702967	0.122281	0.259311	-0.324684	-0.327352	1.31777	0.825702	2.11635	0.746908	0.828326	1.55126	1.39672	1.02997	0.980816	1.26745	1.09177	1.09145	1.7702	1.13992	1.06519	1.43653	1.00857	1.35134	1.40195	1.18706	1.36121	-1.18818
ENSG00000271741	AC114490.2	protein_coding	human	0	0.0922998	0	0	0	0	0	0.0939515	0	0.085237	0.0788701	0	0	0	0	NA	0.766694	NA	NA	NA	NA	NA	-0.806158	NA	0.54332	-0.30784	NA	NA	NA	NA	NA	4.0717	NA	NA	NA	NA	NA	4.07175	NA	4.07162	4.07171	NA	NA	NA	NA	NA
ENSG00000243749	TMEM35B	protein_coding	human	0	0	0	0	0	0	0	0	0	0	0	0	0	0	0	NA	NA	NA	NA	NA	NA	NA	NA	NA	NA	NA	NA	NA	NA	NA	NA	NA	NA	NA	NA	NA	NA	NA	NA	NA	NA	NA	NA	NA	NA	NA
ENSG00000163867	ZMYM6	protein_coding	human	229.403	271.425	204.003	237.291	253.277	205.964	214.427	270.434	163.83	244.651	217.582	183.496	235.798	203.931	190.626	-0.04154	0.0487509	-0.195442	-0.136518	-0.0618167	-0.22961	-0.0779964	-0.109444	-0.0349187	0.125897	-0.242584	-0.13729	0.10589	-0.165484	-0.0822347	0.132493	0.125967	0.141582	0.129155	0.127429	0.150958	0.131313	0.123886	0.162815	0.12754	0.137879	0.145019	0.127809	0.148853	0.151817	-0.313526
ENSG00000197056	ZMYM1	protein_coding	human	972.895	1193.24	876.592	980.8	1154.84	874.271	975.046	1380.74	779.838	1172.23	1060.2	866.67	1152.67	1024.22	871.955	0.229555	0.398259	0.128523	0.0728916	0.40073	0.0598483	-0.139615	0.00421529	-0.0687113	0.204545	-0.268207	-0.0845763	0.358929	-0.338372	-0.00197072	0.0829437	0.0769546	0.0793204	0.073	0.0753217	0.0883877	0.0738631	0.0686225	0.0876365	0.0782485	0.0747355	0.0815661	0.0665161	0.0820013	0.0823	2.7676
ENSG00000233940	RPL12P45	processed_pseudogene	human	0	0	0.201532	0	0	0	0	0	0.175704	0	0.211936	0.185832	0	0	0	NA	NA	1.41939	NA	NA	NA	NA	NA	-1.02734	NA	1.55757	1.17731	NA	NA	NA	NA	NA	4.08047	NA	NA	NA	NA	NA	4.08047	NA	4.08047	4.08047	NA	NA	NA	NA
ENSG00000228348	EFCAB14P1	processed_pseudogene	human	0.815278	1.82385	0.762217	0.870035	1.70689	1.18772	0	1.74865	0.348026	0.82254	0.760695	0	0.791561	1.11316	0.398441	-3.00873	0.0188912	-2.81017	-3.19635	-0.123268	-0.951972	NA	-0.15318	1.87355	3.01784	-2.78093	NA	3.07758	-0.816344	2.27167	2.41492	1.56656	2.47033	2.37872	1.52338	1.96361	NA	1.46021	3.24851	2.30173	2.40079	NA	2.22982	1.84399	3.16689	-1.24589
ENSG00000284640	AL590434.2	lncRNA	human	0	0.1846	0.180185	0	0	1.19338	0	0.187903	1.17536	0.170474	0.346401	0.165187	0	1.21045	1.16607	NA	1.29666	1.41939	NA	NA	3.88486	NA	-1.33638	2.46309	1.07291	0.10551	1.17731	NA	3.92743	3.82619	NA	4.05588	4.08047	NA	NA	2.02864	NA	4.05592	1.93695	4.05584	3.2992	4.08047	NA	1.99047	2.02839	NA
ENSG00000116560	SFPQ	protein_coding	human	14373.3	15047.7	12210.6	14560.4	14138.4	11977.6	15818.7	16307.6	11198.2	16372.8	14031	13298.7	15707.9	12966.6	13307.4	0.509962	0.274749	0.264776	0.378695	0.195748	0.153671	-0.11429	-0.0778288	-0.110916	-0.199505	-0.00853157	-0.228545	-0.151938	-0.0393862	-0.213691	0.0465352	0.0555733	0.0483238	0.0458716	0.0566124	0.0789546	0.0346836	0.0508637	0.076334	0.0459227	0.0472344	0.036899	0.0447115	0.0779365	0.0741472	10.9586
ENSG00000201868	AL590434.1	misc_RNA	human	0	0	0	0	0	0	0	0	0	0	0	0	0	0	0	NA	NA	NA	NA	NA	NA	NA	NA	NA	NA	NA	NA	NA	NA	NA	NA	NA	NA	NA	NA	NA	NA	NA	NA	NA	NA	NA	NA	NA	NA	NA
ENSG00000146463	ZMYM4	protein_coding	human	2673.18	2950.34	2569.47	2742.6	2930.76	2605.89	2569.31	3021.89	2328.55	2752.35	2647.33	2394.83	2805.67	2657.22	2489.76	0.0586552	-0.0556109	0.135058	-0.0551731	0.0202792	0.113336	-0.0964343	0.0769252	-0.0220569	-0.0782787	0.191955	0.0931055	0.106486	0.0954658	0.179269	0.0592421	0.057811	0.0552958	0.0548807	0.0600567	0.0678619	0.0545102	0.0555285	0.0662655	0.0586948	0.0544443	0.0565222	0.0551955	0.067674	0.0663215	0.990093
ENSG00000240374	RN7SL503P	misc_RNA	human	0	0	0	0	0	0	0	0	0	0	0	0	0	0	0	NA	NA	NA	NA	NA	NA	NA	NA	NA	NA	NA	NA	NA	NA	NA	NA	NA	NA	NA	NA	NA	NA	NA	NA	NA	NA	NA	NA	NA	NA	NA
ENSG00000201542	AL160000.1	snoRNA	human	1.16188	0.815315	1.00092	0.627556	0.970208	0.424975	0.841324	0.815997	0.512077	1.02825	0.876602	1.14851	0.626508	0.417373	0.133614	0.688703	-0.785535	0.48555	-1.38287	-0.0415003	-2.0217	-2.05748	0.749329	-2.51394	-1.44586	1.2754	-0.189688	1.37278	-1.97659	-0.628535	1.7826	2.19587	1.98443	2.52441	1.99178	3.08107	2.12962	2.16988	2.79631	1.8961	2.12509	1.76487	2.49109	3.03704	4.08047	0.386347
ENSG00000229994	RPL5P4	processed_pseudogene	human	5.04603	7.86543	5.69205	5.29032	6.23419	4.09978	4.42866	8.1395	3.98825	6.752	7.30895	4.83178	5.51776	4.26985	3.49223	-0.236081	0.559912	0.28702	-0.30296	0.0796064	-0.806681	-0.0461732	-0.473932	-1.09708	0.829955	-0.271801	0.538045	0.408871	-0.880798	-0.499541	0.88619	0.708686	0.814017	0.913018	0.777807	1.04231	0.98306	0.68135	1.02284	0.765415	0.715534	0.884772	0.879854	1.00215	1.17323	-0.2664
ENSG00000227409	ZMYM4-AS1	lncRNA	human	0	0	0.202873	0	0	0	0	0	0.177629	0	0.21295	0.186253	0	0	0	NA	NA	1.41939	NA	NA	NA	NA	NA	-1.02734	NA	1.55757	1.17731	NA	NA	NA	NA	NA	4.08047	NA	NA	NA	NA	NA	4.08047	NA	4.08047	4.08047	NA	NA	NA	NA
ENSG00000278702	AL356362.1	misc_RNA	human	0.171761	0	0	0	0	0	0.168454	0	0	0.178107	0	0.146035	0	0	0	1.22054	NA	NA	NA	NA	NA	-1.13359	NA	NA	-1.32153	NA	-0.746246	NA	NA	NA	4.08047	NA	NA	NA	NA	NA	4.08047	NA	NA	4.08047	NA	4.08047	NA	NA	NA	0.299116
[truncated: 59,524 more rows]
[truncated: 44 more columns]
